# Supplementary material for: Hypoxia-driven deSUMOylation of EXOSC10 promotes adaptive changes in the transcriptome profile
Source: bioRxiv preprint, doi:10.1101/2023.06.23.546038, version 1 (2023-06-23)
Supplement: Suppl. Excel File 1 [file 546038_file10.xlsx]

## Sheet: hypoxvsnormoxpadj005.txt
V1	V2	V3	V4	V6	baseMean	log2FoldChange	lfcSE	stat	pvalue	padj
chr6	34537802	34556333	SPDEF	-	35.4177	-1.94601	0.423039	-4.60007	4.22342e-06	0.000138022
chr9	123356170	123380324	CRB2	+	17.8425	-1.73955	0.579124	-3.00377	0.00266659	0.026501
chr1	6424776	6461367	ESPN	+	30.6007	-1.7283	0.446375	-3.87185	0.000108013	0.00209393
chr2	132671788	133568463	NCKAP5	-	17.6426	-1.65676	0.522722	-3.16948	0.00152712	0.0175111
chr12	109734166	109773508	FAM222A-AS1	-	32.6302	-1.64001	0.417171	-3.93126	8.45032e-05	0.00171332
chr11	17547259	17647150	OTOG	+	78.5604	-1.58847	0.275937	-5.75663	8.58106e-09	5.34201e-07
chr7	16791811	16833433	AGR2	-	155.116	-1.45841	0.246358	-5.91986	3.22209e-09	2.12562e-07
chr10	71212570	71302864	UNC5B	+	158.347	-1.4533	0.274879	-5.28705	1.24302e-07	6.02098e-06
chr8	8561386	8574038	ENSG00000253130	+	17.681	-1.43602	0.511451	-2.80774	0.00498908	0.0420835
chr19	35319261	35347361	CD22	+	19.9831	-1.41615	0.477575	-2.9653	0.00302385	0.0291501
chr1	62236165	62319434	KANK4	-	25.817	-1.41433	0.433473	-3.2628	0.00110317	0.0136488
chr10	132036336	132184858	JAKMIP3	+	17.2454	-1.41049	0.50467	-2.79488	0.00519185	0.0432166
chr19	4502192	4518486	PLIN4	-	43.1509	-1.40327	0.380186	-3.69099	0.000223379	0.00383428
chr7	100837314	100852637	SLC12A9-AS1	-	47.4479	-1.40297	0.314375	-4.46271	8.09289e-06	0.000242102
chr17	17033531	17042305	ENSG00000287910	-	22.2982	-1.33077	0.436318	-3.05001	0.00228833	0.0234777
chr18	50795120	50825402	MRO	-	131.277	-1.30355	0.202693	-6.43117	1.26626e-10	1.07632e-08
chr5	134506552	134509230	LINC01843	+	21.6482	-1.29987	0.448518	-2.89813	0.00375392	0.0343526
chr5	139795808	139844466	PSD2	+	42.624	-1.29842	0.341419	-3.80302	0.000142943	0.00263803
chr1	241995490	241999098	MAP1LC3C	-	18.9965	-1.29336	0.466845	-2.77043	0.00559825	0.0456326
chr3	46130890	46266706	CCR3	+	42.791	-1.28459	0.331415	-3.87607	0.000106157	0.00207387
chr17	55264960	55325187	HLF	+	40.3163	-1.25533	0.340225	-3.68971	0.000224508	0.0038425
chrM	14149	14673	MT-ND6	-	427.196	-1.23356	0.196175	-6.28806	3.21458e-10	2.57166e-08
chr8	105546089	106060524	ZFPM2-AS1	-	23.536	-1.20664	0.439033	-2.74841	0.00598851	0.0477568
chr1	6412418	6424670	HES2	-	41.5488	-1.20531	0.347638	-3.46714	0.000526022	0.0075857
chr2	119429901	119438504	TMEM37	+	505.684	-1.20467	0.194369	-6.19783	5.72463e-10	4.25258e-08
chr2	29097705	29199777	CLIP4	+	375.733	-1.19014	0.254132	-4.68315	2.82494e-06	9.74237e-05
chr10	18140424	18543557	CACNB2	+	7459.42	-1.18892	0.391014	-3.0406	0.00236106	0.0240735
chr17	82359247	82363775	TEX19	+	30.3342	-1.18226	0.37529	-3.15027	0.0016312	0.0184044
chr5	70415352	70448015	GTF2H2B	+	33.6383	-1.17189	0.379291	-3.08969	0.00200363	0.0213992
chr1	207179296	207184062	ENSG00000243636	+	23.9502	-1.17097	0.421608	-2.77739	0.00547971	0.0449983
chr17	41500981	41505705	KRT13	-	31.995	-1.16585	0.3769	-3.09326	0.00197971	0.0212129
chr11	118700415	118750263	ENSG00000255422	+	106.632	-1.15694	0.226966	-5.09743	3.44288e-07	1.51418e-05
chrX	78129748	78139650	TAF9B	-	679.816	-1.15512	0.196481	-5.87903	4.12682e-09	2.68243e-07
chr17	9910606	10198606	GAS7	-	46.4917	-1.15354	0.358509	-3.21759	0.0012927	0.0153286
chr10	132433733	132441484	ENSG00000234311	-	28.5174	-1.14794	0.387759	-2.96045	0.00307186	0.0294366
chr7	43112629	43566001	HECW1	+	373.808	-1.14384	0.174116	-6.56944	5.05037e-11	4.53251e-09
chr6	19323428	19839080	LNC-LBCS	-	151.674	-1.12464	0.249632	-4.50518	6.63161e-06	0.000204263
chr22	21102984	21122286	BCRP2	+	178.624	-1.1183	0.188034	-5.94733	2.72557e-09	1.83225e-07
chr14	52791756	52930185	ENSG00000285664	+	214.597	-1.10999	0.194738	-5.69991	1.19874e-08	7.2017e-07
chr7	101362875	101559024	COL26A1	+	61.3872	-1.08172	0.309947	-3.49001	0.000482997	0.00713996
chr11	17493895	17544416	USH1C	-	908.479	-1.07078	0.159272	-6.72297	1.78058e-11	1.7109e-09
chr11	61752636	61788518	MYRF	+	61.9483	-1.06315	0.309883	-3.4308	0.000601806	0.00848479
chr17	78107397	78132407	TMC6	-	1473.42	-1.0485	0.141949	-7.38641	1.50842e-13	1.96094e-11
chr1	6467122	6520074	PLEKHG5	-	88.2214	-1.03944	0.266472	-3.90076	9.58914e-05	0.00190063
chr1	196651852	196795393	ENSG00000289697	+	38.8682	-1.03854	0.345151	-3.00895	0.00262156	0.0262008
chr1	196651754	196752476	CFH	+	38.7245	-1.03026	0.346072	-2.97703	0.0029106	0.0284149
chr1	190097658	190478404	BRINP3	-	4050.34	-1.0152	0.358837	-2.82914	0.00466737	0.0403319
chr21	15928296	16646364	MIR99AHG	+	4138.39	-1.00145	0.174836	-5.72795	1.01653e-08	6.24037e-07
chr4	52872982	53366066	SCFD2	-	1634.78	-0.999817	0.184953	-5.4058	6.45184e-08	3.31595e-06
chr10	86935540	86969481	MMRN2	-	343.082	-0.991004	0.177589	-5.58032	2.40083e-08	1.36047e-06
chr8	142981738	143018447	LY6E-DT	-	111.23	-0.986669	0.237596	-4.15271	3.28556e-05	0.000790321
chr7	93130056	93148385	SAMD9L	-	260.908	-0.9725	0.1785	-5.44818	5.08878e-08	2.69646e-06
chr2	71453561	71686763	DYSF	+	99.3457	-0.971395	0.286307	-3.39285	0.000691704	0.00946543
chr2	74832655	74833987	HK2-DT	-	139.978	-0.971152	0.224826	-4.31957	1.56336e-05	0.000425888
chr5	61201304	61304811	LINC02057	-	48.0709	-0.951445	0.316279	-3.00825	0.00262759	0.0262314
chr6	143422832	143450695	ADAT2	-	579.358	-0.941724	0.13683	-6.88245	5.88326e-12	5.97662e-10
chr1	100251528	100266182	RTCA-AS1	-	122.766	-0.93456	0.205738	-4.54248	5.55959e-06	0.000177746
chr20	31605283	31606515	ID1	+	1536.91	-0.926835	0.18832	-4.92161	8.58352e-07	3.47269e-05
chr6	28634861	28649538	ENSG00000287279	+	40.7839	-0.926344	0.336516	-2.75275	0.00590974	0.0473422
chr16	68316801	68319036	ENSG00000259797	+	44.1306	-0.924327	0.310612	-2.97582	0.00292205	0.0284952
chr19	2867335	2883445	ZNF556	+	218.61	-0.921791	0.187167	-4.92496	8.43793e-07	3.43739e-05
chr17	35756249	35795707	MMP28	-	209.896	-0.92081	0.214656	-4.28971	1.78909e-05	0.000477091
chr17	69414697	69553865	MAP2K6	+	1645.19	-0.91801	0.134615	-6.81952	9.13455e-12	9.07297e-10
chr1	41361922	41383590	FOXO6	+	50.1843	-0.906031	0.314839	-2.87776	0.00400509	0.0358816
chr3	185506262	185552588	LIPH	-	162.66	-0.887261	0.201827	-4.39615	1.10186e-05	0.000314209
chrX	46599251	46759118	SLC9A7	-	141.065	-0.885802	0.207346	-4.27209	1.93652e-05	0.000507978
chr1	117929720	117966543	WDR3	+	6084.22	-0.877805	0.153933	-5.7025	1.1806e-08	7.12391e-07
chr3	9902612	9916402	IL17RE	+	135.815	-0.874596	0.217853	-4.01462	5.95428e-05	0.00128224
chr2	96143169	96145440	DUSP2	-	501.481	-0.871277	0.193468	-4.50347	6.68523e-06	0.000205556
chr21	26393635	26569252	CYYR1-AS1	+	88.2379	-0.871197	0.308275	-2.82604	0.00471272	0.0405849
chr12	6346843	6377730	SCNN1A	-	104.803	-0.870874	0.239503	-3.63617	0.000276721	0.00455532
chr10	86968432	86983934	ADIRF	+	122.907	-0.855992	0.237573	-3.60307	0.000314482	0.00506379
chr5	90471748	90514557	POLR3G	+	594.661	-0.852098	0.141306	-6.03017	1.63784e-09	1.15366e-07
chr2	190189735	190344193	HIBCH	-	1233.6	-0.841487	0.157287	-5.35	8.79566e-08	4.4053e-06
chrM	8366	8572	MT-ATP8	+	161.242	-0.839945	0.206038	-4.07664	4.56907e-05	0.00103832
chr4	38822897	38856817	TLR6	-	118.589	-0.836742	0.208249	-4.01799	5.86973e-05	0.00127259
chr1	89524829	89597861	LRRC8B	+	640.395	-0.835951	0.167621	-4.98715	6.12773e-07	2.56119e-05
chr12	47753916	47782751	SLC48A1	+	228.053	-0.835872	0.187562	-4.45651	8.3303e-06	0.000247946
chr5	177950335	177963960	ENSG00000249684	+	69.878	-0.835853	0.2588	-3.22973	0.00123909	0.0148623
chr13	51222334	51284239	FAM124A	+	89.4001	-0.829738	0.242691	-3.41891	0.000628721	0.00878719
chr1	37350934	37474432	ZC3H12A-DT	-	276.617	-0.829722	0.177176	-4.68304	2.82658e-06	9.74237e-05
chr4	65319563	65670495	EPHA5	-	3087.88	-0.829575	0.176995	-4.687	2.77238e-06	9.61091e-05
chr4	784957	826129	CPLX1	-	66.6923	-0.828047	0.285579	-2.89954	0.00373713	0.0342403
chr21	26378552	26471698	ENSG00000232692	+	80.7882	-0.827763	0.284658	-2.90792	0.00363841	0.0335645
chr19	11767000	11784078	ZNF441	+	124.992	-0.82187	0.20572	-3.9951	6.46683e-05	0.00137172
chr17	15571491	15651653	ENSG00000251537	-	1788.51	-0.818338	0.186023	-4.39911	1.08693e-05	0.000311158
chr1	75789477	75789548	SNORD45B	+	131.179	-0.812543	0.227841	-3.56628	0.000362091	0.0056453
chr7	150400702	150412470	ENSG00000284691	+	56.5359	-0.810849	0.295127	-2.74746	0.00600586	0.0478736
chr1	186828949	186988981	PLA2G4A	+	1527.78	-0.808203	0.14875	-5.4333	5.53214e-08	2.90232e-06
chr10	86958599	86963258	SNCG	+	1758.04	-0.807101	0.183666	-4.39439	1.11082e-05	0.000315744
chr1	148263476	148263632	RNVU1-22	+	56.2964	-0.806426	0.287392	-2.80601	0.00501586	0.0422452
chr22	21009808	21028013	P2RX6	+	149.285	-0.803527	0.216373	-3.71361	0.000204323	0.00357024
chr1	101025844	101090513	DPH5-DT	+	868.224	-0.799827	0.161557	-4.95075	7.39274e-07	3.0467e-05
chr20	63698642	63708025	ARFRP1	-	1412.32	-0.797337	0.119847	-6.65295	2.87285e-11	2.67327e-09
chr1	150698060	150720895	HORMAD1	-	190.022	-0.796608	0.176658	-4.50932	6.50356e-06	0.000201371
chr3	86876388	86991149	VGLL3	-	4333.87	-0.794162	0.193257	-4.10935	3.96775e-05	0.000927908
chr6	125119049	125264407	TPD52L1	+	970.119	-0.790372	0.135832	-5.81873	5.92967e-09	3.7711e-07
chr13	41127569	41132802	KBTBD6	-	1717.49	-0.783436	0.132643	-5.90636	3.4974e-09	2.2817e-07
chr1	108272943	108337853	SLC25A24P1	+	123.042	-0.782929	0.27271	-2.87092	0.00409281	0.0365274
chr7	129144707	129169699	TSPAN33	+	149.102	-0.782842	0.195045	-4.01364	5.97896e-05	0.00128598
chr3	155762617	155806278	C3orf33	-	287.363	-0.780274	0.16425	-4.75053	2.02885e-06	7.33541e-05
chr2	171999943	172082430	METAP1D	+	567.654	-0.778189	0.175144	-4.44313	8.86593e-06	0.000261686
chr11	64823052	64844653	CDC42BPG	-	84.8351	-0.777463	0.247481	-3.1415	0.00168084	0.0188442
chr6	4994717	5004063	RPP40	-	1014.6	-0.775457	0.161161	-4.8117	1.49651e-06	5.6656e-05
chr8	22219703	22232101	PHYHIP	-	174.604	-0.766389	0.213981	-3.58157	0.00034153	0.00539611
chr1	159958035	159984750	LINC01133	+	95.4047	-0.763826	0.257965	-2.96097	0.0030667	0.0294243
chr4	108742048	108763054	ETNPPL	-	471.288	-0.761656	0.170595	-4.46472	8.01752e-06	0.000240662
chr12	116738178	116853631	RNFT2	+	248.913	-0.761024	0.160128	-4.75259	2.00824e-06	7.27575e-05
chr16	50246137	50318135	ADCY7	+	336.221	-0.759104	0.190658	-3.9815	6.84823e-05	0.00142948
chr2	55865967	55924139	EFEMP1	-	5546.86	-0.757377	0.173346	-4.36917	1.24718e-05	0.000351135
chr12	49568218	49644666	PRPF40B	+	798.369	-0.756416	0.160364	-4.71687	2.39502e-06	8.44076e-05
chr14	72609034	72894101	DPF3	-	198.795	-0.755005	0.202112	-3.73557	0.000187287	0.00333937
chr19	14031762	14053218	IL27RA	+	967.421	-0.744745	0.175942	-4.23289	2.30704e-05	0.000589429
chr1	44850522	44986722	EIF2B3	-	2154.27	-0.743005	0.117294	-6.33457	2.38001e-10	1.95715e-08
chr19	17747718	17788568	FCHO1	+	170.47	-0.738437	0.223501	-3.30396	0.0009533	0.012178
chr17	15627960	15684311	TRIM16	-	2326.29	-0.73543	0.169746	-4.33253	1.47406e-05	0.00040721
chr17	59220467	59275970	GDPD1	+	71.35	-0.733294	0.259249	-2.82853	0.00467618	0.0403759
chr5	71035016	71067689	GTF2H2	-	108.005	-0.731054	0.225767	-3.23809	0.00120331	0.0145318
chr10	71747556	71773520	VSIR	-	237.168	-0.726213	0.185171	-3.92186	8.78679e-05	0.00177341
chr16	88706483	88715396	CTU2	+	434.636	-0.724925	0.16558	-4.37809	1.19725e-05	0.000339002
chr20	1226044	1296421	RAD21L1	+	212.263	-0.719198	0.190768	-3.77001	0.000163243	0.00296501
chr19	47349355	47350224	ENSG00000288827	+	73.8474	-0.713175	0.250578	-2.84612	0.00442553	0.0388827
chr12	3077355	3286564	TSPAN9	+	461.538	-0.709417	0.160692	-4.41477	1.01116e-05	0.000292498
chr16	722582	726954	CCDC78	-	174.42	-0.709259	0.203072	-3.49265	0.000478254	0.00709952
chr4	38790677	38856817	TLR1	-	163.128	-0.708158	0.197969	-3.57711	0.000347414	0.00547929
chr8	98117293	98159835	POP1	+	2502.3	-0.705332	0.143276	-4.92288	8.52798e-07	3.46249e-05
chr7	72558744	72828200	TYW1B	-	367.805	-0.700924	0.175486	-3.99419	6.49153e-05	0.00137285
chr17	62627670	62693597	MRC2	+	1208.95	-0.700814	0.151522	-4.62517	3.74285e-06	0.000124386
chr15	87576929	87579866	LINC00052	+	275.843	-0.700508	0.162416	-4.31305	1.61018e-05	0.000437295
chr5	115267190	115296693	CCDC112	-	491.481	-0.698374	0.17295	-4.038	5.39085e-05	0.00118841
chr3	122411846	122416062	WDR5B	-	239.17	-0.697485	0.172486	-4.04372	5.26094e-05	0.00116122
chr11	95089846	95132645	ENDOD1	+	1289.25	-0.691613	0.134798	-5.13072	2.88643e-07	1.30184e-05
chr19	43766533	43780976	KCNN4	-	730.254	-0.69074	0.16662	-4.14561	3.38904e-05	0.000807524
chr11	119364359	119526664	USP2-AS1	+	220.107	-0.690448	0.206078	-3.35041	0.000806912	0.0106704
chr8	66430185	66445324	ENSG00000285655	+	400.314	-0.68855	0.177763	-3.87341	0.000107324	0.00208624
chr4	1793293	1808872	FGFR3	+	477.281	-0.688421	0.169185	-4.06904	4.72064e-05	0.00106591
chr1	64470129	64693058	CACHD1	+	435.714	-0.686583	0.172244	-3.9861	6.71675e-05	0.00141466
chr11	62853663	62853732	SNORD30	-	77.4475	-0.686477	0.242362	-2.83245	0.00461933	0.0400342
chr10	59650764	59736002	SLC16A9	-	200.726	-0.686364	0.223633	-3.06915	0.00214667	0.0224974
chrM	4470	5511	MT-ND2	+	502.509	-0.686284	0.180625	-3.79949	0.000144992	0.00267027
chr17	54968727	55173632	STXBP4	+	1098.45	-0.685097	0.141439	-4.84377	1.27399e-06	4.92871e-05
chr5	103120149	103212799	PPIP5K2	+	3187.51	-0.68389	0.122209	-5.59607	2.19261e-08	1.25862e-06
chr7	1738630	1742291	ELFN1-AS1	-	123.888	-0.683056	0.217245	-3.14417	0.00166556	0.0187203
chr6	26402237	26415208	BTN3A1	+	612.796	-0.681852	0.144613	-4.71501	2.41702e-06	8.49559e-05
chr15	80152490	80186946	FAH	+	663.278	-0.681539	0.182017	-3.74437	0.000180847	0.00324606
chr8	143566192	143572772	MROH6	-	475.219	-0.680431	0.169563	-4.01285	5.99896e-05	0.00128827
chr10	97584323	97612802	HOGA1	+	343.216	-0.680216	0.195726	-3.47535	0.000510184	0.00741781
chr2	10439968	10448327	ODC1	-	4265.85	-0.679127	0.17068	-3.97894	6.92233e-05	0.00144154
chr10	102226299	102229589	ELOVL3	+	91.0188	-0.6756	0.233194	-2.89716	0.00376555	0.0344056
chr6	10694972	10709782	PAK1IP1	+	2196.25	-0.672666	0.155327	-4.33064	1.48674e-05	0.000409434
chr5	154190730	154420984	GALNT10	+	1703.95	-0.671025	0.148684	-4.51308	6.38918e-06	0.000198525
chr10	86965345	86971311	ADIRF-AS1	-	143.344	-0.670758	0.198395	-3.38092	0.000722449	0.00980268
chr9	116423112	117415070	ASTN2	-	552.79	-0.669546	0.177331	-3.77568	0.000159569	0.00290844
chr16	1963745	1964095	ENSG00000255513	-	83.3933	-0.667656	0.239046	-2.793	0.00522215	0.0434483
chr21	14819699	14918552	LINC02246	-	342.415	-0.665802	0.190628	-3.49268	0.000478204	0.00709952
chr3	51933429	51941904	RRP9	-	1478.62	-0.665337	0.160598	-4.14286	3.42998e-05	0.000813987
chr22	29480218	29491390	NEFH	+	588.038	-0.664936	0.175949	-3.77915	0.000157366	0.00287123
chr5	65722205	65871725	NLN	+	3282	-0.663846	0.145023	-4.57752	4.70521e-06	0.000152919
chr3	49907160	49930173	MON1A	-	533.258	-0.663537	0.163001	-4.07074	4.68631e-05	0.00105951
chr5	177939622	177983054	ENSG00000250101	+	121.267	-0.662865	0.214049	-3.09679	0.00195628	0.0210255
chr6	47231532	47309905	TNFRSF21	-	313.47	-0.662773	0.159738	-4.14913	3.33737e-05	0.000798475
chr5	176383946	176388927	NOP16	-	1897.4	-0.661499	0.172015	-3.84559	0.000120264	0.00228139
chr4	83535914	83605875	GPAT3	+	363.273	-0.659926	0.158111	-4.17383	2.9952e-05	0.000735489
chr10	26697701	26746798	PDSS1	+	1237.69	-0.655047	0.14974	-4.37457	1.21671e-05	0.000343633
chr3	50267558	50277546	SEMA3B	+	3166.51	-0.652382	0.169841	-3.84113	0.00012247	0.00231579
chr2	43774039	43810010	DYNC2LI1	+	609.745	-0.650656	0.132611	-4.90652	9.27074e-07	3.7083e-05
chr1	207165496	207183910	C4BPAP1	+	101.933	-0.648055	0.233913	-2.7705	0.00559711	0.0456326
chr11	111874056	111881243	FDXACB1	-	108.294	-0.647956	0.224288	-2.88895	0.00386537	0.0351361
chr9	15163622	15307360	TTC39B	-	220.373	-0.645822	0.177984	-3.62853	0.000285035	0.0046671
chr2	222566899	222656092	FARSB	-	3283.66	-0.645538	0.115924	-5.56863	2.56743e-08	1.44102e-06
chr12	109088188	109093631	ALKBH2	-	675.622	-0.643128	0.151493	-4.24528	2.18324e-05	0.000561043
chr12	13196723	13219941	EMP1	+	180.127	-0.641048	0.196849	-3.25655	0.00112775	0.0138643
chr2	218658764	218663443	BCS1L	+	683.675	-0.638989	0.139628	-4.57636	4.73138e-06	0.000153207
chr2	230165186	230225729	SP110	-	199.211	-0.637228	0.178515	-3.56961	0.000357514	0.00558688
chr8	124488485	124539458	TATDN1	-	778.603	-0.637202	0.131514	-4.84513	1.26531e-06	4.90585e-05
chr5	44742420	44808777	MRPS30-DT	-	249.955	-0.637109	0.180884	-3.5222	0.000427979	0.00650616
chr20	63520765	63522206	PPDPF	+	285.925	-0.636648	0.196259	-3.24392	0.00117897	0.014316
chr4	113418054	113761927	CAMK2D	-	2025.8	-0.636167	0.157579	-4.03713	5.41096e-05	0.00119135
chr8	103414714	103443453	DCAF13	+	2638.28	-0.635854	0.145977	-4.35584	1.32557e-05	0.000369654
chr15	72159806	72197787	GRAMD2A	-	215.29	-0.634228	0.185962	-3.41052	0.000648397	0.00899817
chr6	56955107	57027346	BEND6	+	188.718	-0.634074	0.190039	-3.33655	0.000848255	0.0111008
chr8	33485182	33501262	MAK16	+	1439.95	-0.632637	0.14354	-4.4074	1.04619e-05	0.000301247
chr9	93184122	93320572	WNK2	+	550.785	-0.632054	0.172037	-3.67394	0.000238836	0.00403692
chr20	6074845	6123214	FERMT1	-	1197.92	-0.630431	0.141497	-4.45545	8.3719e-06	0.000248765
chrX	150361422	150514178	MAMLD1	+	1779.41	-0.629732	0.168634	-3.73431	0.000188227	0.00334325
chr4	145599042	145660033	MMAA	+	139.977	-0.629283	0.202819	-3.10269	0.0019177	0.0206837
chr19	45406644	45410737	POLR1G	+	1124.17	-0.627768	0.174562	-3.59625	0.000322839	0.00516076
chr19	19776561	19836196	ZNF56P	+	401.913	-0.627114	0.149096	-4.2061	2.59811e-05	0.000646056
chr9	98120975	98192637	CORO2A	-	144.654	-0.626847	0.224162	-2.7964	0.00516754	0.0430636
chr7	97966377	97970404	ENSG00000285725	-	149.241	-0.624941	0.200844	-3.11157	0.00186097	0.0203099
chr2	171783405	171999859	SLC25A12	-	1441.83	-0.624768	0.117905	-5.2989	1.16505e-07	5.75367e-06
chr6	41683978	41736259	TFEB	-	481.845	-0.624348	0.167205	-3.73402	0.00018845	0.00334325
chr17	18697998	18736118	TRIM16L	+	1647.56	-0.624164	0.183302	-3.40512	0.00066136	0.00914933
chr3	50155045	50189075	SEMA3F	+	2299.92	-0.623114	0.132107	-4.71673	2.39664e-06	8.44076e-05
chr15	62390526	62844631	TLN2	+	3522.23	-0.622127	0.14387	-4.32422	1.53076e-05	0.000418296
chr15	89608789	89663086	KIF7	-	338.706	-0.621868	0.146646	-4.24059	2.22928e-05	0.000571213
chr11	44564427	44620358	CD82	+	231.375	-0.621366	0.19092	-3.25458	0.00113558	0.0139059
chr4	138164097	138242349	SLC7A11	-	1702	-0.620671	0.120089	-5.16842	2.36082e-07	1.07853e-05
chr16	89711856	89718165	VPS9D1-AS1	+	125.003	-0.620466	0.208669	-2.97344	0.00294478	0.0285973
chr1	93885199	93909456	GCLM	-	4811.58	-0.618365	0.157779	-3.9192	8.88443e-05	0.00178903
chr9	136546212	136549893	NALT1	+	193.873	-0.617994	0.191466	-3.2277	0.0012479	0.0149174
chr10	112149865	112215377	GPAM	-	1318.74	-0.617635	0.116927	-5.28224	1.27616e-07	6.14781e-06
chr16	74671855	74700960	MLKL	-	974.816	-0.617375	0.136789	-4.51335	6.38103e-06	0.000198525
chr10	99782640	99852594	ABCC2	+	7114.34	-0.617185	0.124014	-4.97673	6.46677e-07	2.69018e-05
chr1	89633140	89933250	ENSG00000271949	+	4786.82	-0.616889	0.193404	-3.18965	0.00142447	0.0166565
chr10	103396626	103446294	PDCD11	+	5711.16	-0.616793	0.136804	-4.50859	6.52593e-06	0.00020171
chr8	144137774	144140851	HGH1	+	1984.6	-0.616594	0.14299	-4.31215	1.61675e-05	0.000438406
chr9	113876282	114056593	ZNF618	+	586.887	-0.615023	0.152742	-4.02655	5.66006e-05	0.00124002
chr14	60981114	61114316	SLC38A6	+	732.2	-0.614549	0.130805	-4.69822	2.62433e-06	9.1515e-05
chr17	47897330	47941410	SP2-AS1	-	210.629	-0.613981	0.195634	-3.13842	0.00169861	0.0189832
chr4	146253975	146522372	SLC10A7	-	753.494	-0.611989	0.197659	-3.09618	0.00196031	0.021056
chr1	232983435	233295725	PCNX2	-	1314.74	-0.611666	0.149763	-4.08423	4.42241e-05	0.00101018
chr3	113828182	113947174	GRAMD1C	+	435.308	-0.611585	0.145198	-4.21208	2.53029e-05	0.000636352
chr12	109116587	109268226	ACACB	+	3066.26	-0.611312	0.135012	-4.52785	5.95879e-06	0.000187458
chr5	131170944	131205428	LYRM7	+	804.878	-0.60839	0.14434	-4.21498	2.498e-05	0.000630924
chr11	74988279	75018893	NEU3	+	1582.92	-0.60754	0.123469	-4.92061	8.62761e-07	3.47463e-05
chr12	12927712	12984645	GPRC5D-AS1	+	389.822	-0.606819	0.175904	-3.44972	0.000561164	0.00800112
chrM	12337	14148	MT-ND5	+	1341	-0.605945	0.165655	-3.65787	0.000254324	0.00424996
chr2	43230851	43596038	THADA	-	2975.87	-0.605648	0.130685	-4.63442	3.57943e-06	0.00011918
chr12	121839527	121863596	HPD	-	9295.43	-0.604882	0.122611	-4.93334	8.08351e-07	3.30061e-05
chr11	108665058	108940999	DDX10	+	3128.51	-0.6044	0.156681	-3.85752	0.000114544	0.00219408
chrM	8527	9207	MT-ATP6	+	969.737	-0.603841	0.154137	-3.91756	8.94491e-05	0.00179575
chr6	118894152	118909171	ASF1A	+	1037.39	-0.602276	0.13638	-4.41615	1.00473e-05	0.000291206
chr13	87671371	87696272	SLITRK5	+	465.29	-0.600961	0.140036	-4.29147	1.77492e-05	0.000474026
chr19	34926903	34945170	ZNF30	+	239.319	-0.60089	0.181517	-3.31037	0.000931722	0.0119553
chr2	164653624	164843679	COBLL1	-	1289.33	-0.596677	0.17304	-3.44819	0.000564348	0.00804003
chr9	33461353	33473930	NOL6	-	4901.57	-0.596468	0.14854	-4.01554	5.93094e-05	0.00127877
chr20	33657087	33674463	NECAB3	-	3034.06	-0.594997	0.12678	-4.69313	2.69051e-06	9.36383e-05
chr14	102224500	102305190	MOK	-	248.494	-0.594423	0.158654	-3.74667	0.000179195	0.00322888
chr7	92604921	92836573	CDK6	-	6234.13	-0.594348	0.121891	-4.87607	1.0822e-06	4.2424e-05
chr3	69168782	69542583	FRMD4B	-	377.715	-0.592677	0.155424	-3.81328	0.000137135	0.0025468
chr5	64766368	65102412	CWC27	+	2174.26	-0.592052	0.15891	-3.7257	0.000194771	0.00343667
chr12	64759484	64881033	TBC1D30	+	450.099	-0.589876	0.158008	-3.73321	0.000189054	0.00334918
chrX	115694880	115969148	DANT2	-	3460.13	-0.58863	0.192482	-3.0581	0.00222746	0.0230571
chr12	55835433	55842966	MMP19	-	152.763	-0.588112	0.208245	-2.82414	0.00474078	0.0407274
chr8	144262045	144291438	BOP1	-	3444	-0.587695	0.148984	-3.94467	7.99096e-05	0.00163892
chr11	61680391	61747001	DAGLA	+	573.34	-0.587271	0.16352	-3.59143	0.000328864	0.00524285
chr20	13221274	13300651	ISM1	+	263.148	-0.586911	0.180828	-3.24569	0.00117166	0.0142371
chr20	36890229	36951893	SAMHD1	-	762.514	-0.586903	0.153473	-3.82414	0.00013123	0.00245778
chr22	18150118	18177397	USP18	+	274.053	-0.586641	0.171034	-3.42997	0.000603639	0.00850386
chr2	19910263	19990105	WDR35	-	856.196	-0.586202	0.171644	-3.41521	0.000637321	0.00887931
chr1	151806071	151831845	RORC	-	664.679	-0.585697	0.192099	-3.04893	0.00229659	0.0235247
chr5	154818492	154859252	FAXDC2	-	125.763	-0.583355	0.207987	-2.80476	0.00503537	0.0423728
chr5	91380349	91616105	ARRDC3-AS1	+	527.331	-0.583164	0.176065	-3.31221	0.000925621	0.0118932
chr11	85647967	85656547	TMEM126A	+	1041.82	-0.5826	0.1513	-3.85063	0.000117816	0.00224702
chr13	99606669	99909459	CLYBL	+	428.835	-0.582217	0.186528	-3.12135	0.00180025	0.0198679
chr11	14643804	14872044	PDE3B	+	3589.42	-0.579503	0.147425	-3.93082	8.4656e-05	0.00171445
chr1	156594301	156601496	GPATCH4	-	3037.52	-0.57931	0.146005	-3.96775	7.25539e-05	0.00150558
chr7	97969005	97972254	CCZ1P1	-	120.539	-0.578928	0.209983	-2.75702	0.00583309	0.046813
chr10	101781325	101783446	NPM3	-	1269.67	-0.578048	0.173171	-3.33802	0.000843764	0.0110621
chr8	96239398	96261610	MTERF3	-	1088.36	-0.577809	0.129331	-4.46766	7.90788e-06	0.000237774
chr5	154887411	154938211	GEMIN5	-	2936.45	-0.57726	0.138743	-4.16064	3.17363e-05	0.000767574
chr11	125946044	125958647	VSIG10L2	+	206.12	-0.577103	0.173683	-3.32274	0.000891392	0.0115626
chr6	18155329	18223854	KDM1B	+	955.378	-0.576336	0.134563	-4.28302	1.84372e-05	0.000489444
chr12	113422380	113438276	SDSL	+	175.749	-0.57345	0.178247	-3.21717	0.00129463	0.0153412
chr1	220786990	220884503	ENSG00000286231	+	8505.11	-0.571816	0.165962	-3.44546	0.000570093	0.0081088
chr1	26432282	26471306	DHDDS	+	891.828	-0.571586	0.127291	-4.49039	7.10914e-06	0.000216706
chrM	3307	4262	MT-ND1	+	544.259	-0.571568	0.150176	-3.80599	0.00014124	0.00260932
chr8	66429014	66430733	RRS1	+	936.347	-0.571559	0.156349	-3.65565	0.000256527	0.00428272
chr4	39459004	39485109	LIAS	+	526.86	-0.571198	0.15167	-3.76607	0.000165837	0.00300717
chr5	60945177	61154531	NDUFAF2	+	1906.52	-0.570915	0.206261	-2.76793	0.00564141	0.0458429
chr17	76470891	76501790	RHBDF2	-	1145.57	-0.570086	0.141899	-4.01755	5.88067e-05	0.00127259
chr19	44228729	44305046	ZNF235	-	422.286	-0.569804	0.170761	-3.33685	0.000847351	0.0110972
chr1	207801518	207879115	MIR29B2CHG	-	512.597	-0.566614	0.168073	-3.37125	0.000748288	0.010053
chr13	50082169	50906856	DLEU1	+	1026.83	-0.566161	0.148298	-3.81774	0.000134682	0.00250915
chr1	220786352	220819659	MTARC1	+	7950.1	-0.566144	0.165455	-3.42174	0.000622221	0.00871011
chr1	161184302	161199054	ADAMTS4	-	224.991	-0.565321	0.206906	-2.73226	0.0062901	0.0497133
chr1	75787889	75787972	SNORD45A	+	200.241	-0.56523	0.186278	-3.03433	0.00241073	0.0244952
chr1	75786197	75795086	RABGGTB	+	16489	-0.564664	0.120577	-4.68302	2.82683e-06	9.74237e-05
chr8	143574785	143578649	NAPRT	-	3353.6	-0.564127	0.152599	-3.6968	0.000218337	0.00377086
chr1	150996549	151008376	MINDY1	-	280.149	-0.563696	0.157786	-3.57254	0.000353538	0.00553147
chr17	48892765	48895871	ATP5MC1	+	3108.84	-0.563315	0.17795	-3.16557	0.00154777	0.0176947
chr22	28883572	29057488	ZNRF3	+	2340.02	-0.56305	0.15162	-3.71356	0.00020436	0.00357024
chr1	222557902	222589933	TAF1A	-	633.101	-0.562239	0.135291	-4.15577	3.24201e-05	0.000781974
chr12	123633739	123662604	GTF2H3	+	2080.1	-0.558729	0.139645	-4.00107	6.3057e-05	0.0013471
chr6	5261044	5829192	FARS2	+	6615.91	-0.558539	0.193757	-2.88268	0.00394309	0.0355603
chr4	169094259	169270956	SH3RF1	-	3823.38	-0.558192	0.155705	-3.58493	0.000337171	0.00533678
chr14	103529196	103537073	TRMT61A	+	627.101	-0.556246	0.14937	-3.72394	0.000196137	0.00345389
chr5	10275875	10307902	CMBL	-	3147.85	-0.556136	0.122576	-4.53708	5.70388e-06	0.000181702
chr3	32105689	32168709	GPD1L	+	2472.38	-0.554894	0.125641	-4.41652	1.00305e-05	0.000291197
chr21	42843094	42879568	WDR4	-	2418.48	-0.554226	0.12245	-4.52613	6.00729e-06	0.000188246
chr17	27456448	27626438	KSR1	+	474.507	-0.551768	0.162112	-3.40361	0.000665009	0.00918543
chr14	102341102	102362916	CINP	-	701.03	-0.551702	0.149492	-3.6905	0.000223811	0.00383428
chr11	62761565	62766710	POLR2G	+	1600.77	-0.551657	0.141878	-3.88824	0.000100972	0.00199017
chr6	82892390	83065841	UBE3D	-	726.454	-0.548967	0.176662	-3.10744	0.00188717	0.0205451
chr2	217799588	218033982	TNS1	-	1295.8	-0.548493	0.168616	-3.25291	0.00114228	0.0139568
chr11	107502727	107565742	ALKBH8	-	665.23	-0.548105	0.14457	-3.79128	0.000149873	0.0027477
chr10	94333226	94362959	NOC3L	-	3111.59	-0.54803	0.129712	-4.22498	2.38958e-05	0.000608757
chr4	26576437	26756223	TBC1D19	+	447.414	-0.547485	0.156552	-3.49715	0.000470257	0.00701604
chr2	178112424	178139011	RBM45	+	701.888	-0.547306	0.140173	-3.90451	9.44178e-05	0.00188197
chrM	10470	10766	MT-ND4L	+	711.271	-0.547112	0.135182	-4.04722	5.18302e-05	0.0011512
chr4	127623271	127726737	INTU	+	373.282	-0.546654	0.153638	-3.55806	0.000373611	0.00579933
chr20	33702758	33720319	PXMP4	-	363.429	-0.545628	0.178446	-3.05766	0.00223071	0.0230772
chrX	129906121	129929761	UTP14A	+	2451.93	-0.544472	0.136278	-3.9953	6.4613e-05	0.00137172
chr11	93733228	93733300	SNORD5	-	147.234	-0.544061	0.196562	-2.76788	0.0056422	0.0458429
chr1	224434660	224740554	CNIH3	+	639.466	-0.543583	0.159466	-3.40878	0.000652543	0.00904151
chr7	121348878	121396364	FAM3C	-	575.459	-0.543557	0.154187	-3.52531	0.00042298	0.00643884
chr10	23694746	24547848	KIAA1217	+	410.176	-0.543487	0.151779	-3.58079	0.000342556	0.00540748
chr17	42950526	42964498	AARSD1	-	1202.67	-0.542821	0.134784	-4.02734	5.64119e-05	0.00123742
chr12	974133	991190	ENSG00000250132	-	152.39	-0.542413	0.187753	-2.88897	0.00386504	0.0351361
chr14	71320449	71741229	SIPA1L1	+	4122.06	-0.542003	0.182176	-2.97516	0.00292833	0.0285296
chr20	1266280	1309328	SNPH	+	466.066	-0.541569	0.139849	-3.87254	0.000107709	0.00209033
chr4	114598770	114678225	UGT8	+	2163.94	-0.54144	0.128511	-4.21317	2.51815e-05	0.000634202
chr13	41566835	41961120	VWA8	-	4008.28	-0.541155	0.151668	-3.56803	0.000359679	0.00561264
chr3	46668995	46693704	ALS2CL	-	388.669	-0.540513	0.153502	-3.52121	0.000429578	0.00652486
chr12	64759496	64977509	ENSG00000288591	+	473.44	-0.540287	0.158362	-3.41172	0.000645536	0.0089796
chr1	110362851	110391082	SLC16A4	-	237.748	-0.539806	0.165246	-3.26669	0.00108814	0.01351
chr2	238060924	238099413	SCLY	+	951.41	-0.53953	0.146194	-3.69051	0.000223807	0.00383428
chr1	89821014	89936611	LRRC8D	+	7769.68	-0.53939	0.129474	-4.16601	3.09981e-05	0.000754886
chr17	40058290	40093867	THRA	+	887.668	-0.539308	0.149088	-3.61738	0.000297601	0.00484046
chr1	92080305	92184725	BTBD8	+	240.855	-0.539262	0.17072	-3.15875	0.00158447	0.0180035
chr1	100872372	100895179	EXTL2	-	1962.45	-0.536664	0.11989	-4.47629	7.59513e-06	0.00022915
chr11	31369840	31432835	DNAJC24	+	854.221	-0.536648	0.157319	-3.41121	0.000646758	0.00898953
chr2	171315746	171434802	METTL8	-	1249.02	-0.536583	0.148948	-3.60248	0.000315198	0.0050707
chr17	82942149	83051809	B3GNTL1	-	462.411	-0.535571	0.173661	-3.084	0.00204237	0.0216482
chr1	164555584	164899296	PBX1	+	6703.75	-0.534211	0.158719	-3.36576	0.000763327	0.0102162
chr1	99703970	99766635	FRRS1	-	1009.55	-0.534142	0.136827	-3.90379	9.46982e-05	0.00188543
chr5	153990148	154038936	FAM114A2	-	539.463	-0.534096	0.137892	-3.87329	0.000107376	0.00208624
chr17	16217191	16351797	PIGL	+	781.649	-0.533679	0.14986	-3.56118	0.000369195	0.00574087
chr7	134646811	134679816	BPGM	+	556.218	-0.533598	0.132979	-4.01265	6.00414e-05	0.00128827
chr13	36168217	36214588	SOHLH2	-	1769.03	-0.532612	0.124957	-4.26237	2.0227e-05	0.000525129
chr4	141636583	141733987	IL15	+	1461.66	-0.53077	0.171834	-3.08885	0.00200932	0.0214004
chr3	11790442	11846919	TAMM41	-	1024.36	-0.530517	0.134678	-3.93916	8.17686e-05	0.00166744
chr12	88492793	88580851	KITLG	-	14475.7	-0.530485	0.120301	-4.40964	1.03542e-05	0.000298634
chr11	83184491	83193794	ANKRD42-DT	-	667.705	-0.529612	0.131763	-4.01943	5.8338e-05	0.00126709
chr16	5084284	5097795	EEF2KMT	-	395.167	-0.528933	0.177219	-2.98462	0.00283929	0.0278852
chr3	12484421	12541549	TSEN2	+	2402.51	-0.528489	0.136093	-3.88329	0.000103053	0.00202441
chr17	72645949	73092712	SLC39A11	-	2304.52	-0.527268	0.15584	-3.38339	0.000715956	0.00972952
chr9	37510892	37576380	FBXO10	-	205.809	-0.527155	0.192562	-2.73759	0.00618914	0.0491573
chr1	197504748	197775696	DENND1B	-	4531.8	-0.526641	0.154492	-3.40886	0.000652357	0.00904151
chr4	125314918	125492932	FAT4	+	945.276	-0.525223	0.134588	-3.90245	9.5225e-05	0.00189379
chr21	14961235	15065936	NRIP1	-	5383.76	-0.525156	0.144152	-3.64307	0.000269408	0.00445986
chr5	139846779	140043299	NRG2	-	927.161	-0.524504	0.148986	-3.5205	0.000430726	0.00653668
chr8	10764961	10839884	PINX1	-	597.345	-0.524003	0.140318	-3.73439	0.000188169	0.00334325
chr2	218859805	218874233	WNT6	+	542.907	-0.523372	0.173571	-3.01533	0.00256703	0.0257577
chr3	36826819	36945057	TRANK1	-	298.714	-0.52281	0.163897	-3.18988	0.00142334	0.0166543
chr12	57768471	57772119	METTL1	-	476.926	-0.52278	0.152975	-3.41741	0.000632201	0.00882187
chr2	38751534	38785002	GEMIN6	+	626.017	-0.52216	0.166627	-3.1337	0.00172619	0.019259
chr12	52232520	52252186	KRT7	+	10037.8	-0.521976	0.163786	-3.18695	0.00143782	0.0167793
chr7	22854126	22872952	SNHG26	+	340.747	-0.521581	0.189147	-2.75753	0.00582391	0.0467818
chr18	49822789	50195164	MYO5B	-	4158.4	-0.52118	0.114959	-4.53362	5.79812e-06	0.000183966
chr1	19251805	19260128	MRTO4	+	2455.55	-0.520796	0.154091	-3.37979	0.000725418	0.00982789
chrX	139581770	139708216	MCF2	-	508.769	-0.519813	0.138985	-3.74006	0.000183973	0.0032953
chr9	2720469	2844095	PUM3	-	6477.6	-0.519223	0.141389	-3.67231	0.000240371	0.00405125
chr16	4796968	4802880	ROGDI	-	448.51	-0.518571	0.16347	-3.17226	0.00151257	0.0174091
chr11	86791059	86952910	PRSS23	+	8559.61	-0.518014	0.111719	-4.63676	3.53919e-06	0.000118285
chr8	10725399	10839847	PINX1	-	617.409	-0.51784	0.139635	-3.70853	0.000208466	0.00363121
chr12	6328757	6342114	TNFRSF1A	-	2118.7	-0.517372	0.142266	-3.63665	0.000276204	0.00455106
chr15	66490135	66497780	SNAPC5	-	1224.35	-0.516906	0.147809	-3.49713	0.000470296	0.00701604
chr21	36156782	36294274	DOP1B	+	879.386	-0.516715	0.145325	-3.55559	0.000377134	0.00583353
chr3	180983697	180989774	DNAJC19	-	756.183	-0.516361	0.143914	-3.58799	0.000333243	0.00529357
chr14	31489956	31861224	NUBPL	+	1127.5	-0.515723	0.164699	-3.13131	0.0017403	0.0193635
chr1	29192657	29230942	MECR	-	561.519	-0.51557	0.136062	-3.78921	0.000151124	0.00276592
chr11	31509755	31790324	ELP4	+	2546.42	-0.514381	0.16441	-3.12864	0.00175616	0.0194908
chr11	70372246	70398488	CTTN-DT	-	264.079	-0.514112	0.172816	-2.97492	0.00293065	0.0285319
chr4	4267701	4290154	LYAR	-	1188.94	-0.512917	0.151483	-3.38598	0.000709256	0.00965331
chr14	20256558	20305960	TTC5	-	485.844	-0.511517	0.150885	-3.3901	0.000698675	0.00953131
chrX	64185117	64205708	AMER1	-	843.731	-0.511399	0.158576	-3.22494	0.00126	0.0150519
chr22	21417371	21451463	HIC2	+	222.395	-0.510857	0.165177	-3.09279	0.00198284	0.0212335
chr12	101280105	101386618	UTP20	+	6788.34	-0.510416	0.133309	-3.82881	0.000128765	0.00241674
chr6	99369401	99394195	COQ3	-	735.498	-0.510004	0.140646	-3.62616	0.000287664	0.00469613
chr8	141207166	141308305	SLC45A4	-	3963.22	-0.509805	0.155629	-3.27577	0.00105376	0.0132319
chr11	20387558	20509338	PRMT3	+	2471.21	-0.509262	0.139552	-3.64926	0.000262998	0.00437011
chr11	3339261	3379222	ZNF195	-	1644.32	-0.507943	0.123792	-4.1032	4.07471e-05	0.000949155
chr21	14818843	15014430	ENSG00000235609	-	4126.33	-0.507601	0.127445	-3.98292	6.80747e-05	0.00142602
chr15	43796142	43804427	HYPK	+	1361.42	-0.506023	0.180572	-2.80234	0.0050734	0.0425915
chr20	4852356	5010293	SLC23A2	-	867.292	-0.504445	0.130997	-3.8508	0.000117732	0.00224702
chr5	16473038	16617101	RETREG1	-	379.234	-0.504238	0.141067	-3.57446	0.000350946	0.00551288
chr4	139301446	139420033	NAA15	+	4988.74	-0.503973	0.121553	-4.14611	3.38171e-05	0.000807524
chr16	69337996	69343106	NIP7	+	1634.25	-0.503671	0.154703	-3.25572	0.00113104	0.0138867
chr6	17759183	17987635	KIF13A	-	15160.2	-0.50303	0.137248	-3.66511	0.000247228	0.00414313
chr22	25564675	25729294	GRK3	+	279.724	-0.502972	0.15391	-3.26796	0.00108324	0.0134999
chr17	82057506	82065887	DUS1L	-	5851.3	-0.500987	0.143078	-3.50151	0.000462636	0.0069612
chr21	45493572	45573365	SLC19A1	-	1292.24	-0.500786	0.145091	-3.45152	0.00055743	0.00796071
chr10	92046692	92291078	CPEB3	-	1466.6	-0.500416	0.164124	-3.04901	0.00229599	0.0235247
chr15	66336191	66386746	TIPIN	-	958.832	-0.499272	0.143685	-3.47476	0.000511313	0.00742812
chr1	156737303	156741590	MRPL24	-	2982.73	-0.499192	0.147834	-3.3767	0.000733607	0.00989513
chr1	218285293	218337983	RRP15	+	2344.56	-0.498974	0.128581	-3.88063	0.000104187	0.0020399
chr20	63657810	63696253	RTEL1	+	2315.69	-0.49817	0.111245	-4.47813	7.53006e-06	0.000227575
chr15	82752884	82757208	ENSG00000252690	+	389.238	-0.49689	0.155641	-3.19255	0.00141022	0.0165226
chr5	96875986	96919703	ERAP2	+	298.65	-0.495592	0.160733	-3.08332	0.00204707	0.021685
chr16	4777939	4801423	ENSG00000285952	-	399.209	-0.495496	0.161649	-3.06527	0.00217475	0.0226861
chr14	91779746	91867536	TC2N	-	891.045	-0.49485	0.117593	-4.20815	2.57473e-05	0.000642048
chr5	113022099	113488823	MCC	-	3054.85	-0.494437	0.119113	-4.151	3.31019e-05	0.000795166
chr13	44939249	44989471	NUFIP1	-	802.952	-0.494174	0.149282	-3.31035	0.000931809	0.0119553
chr9	96313444	96383711	SLC35D2	-	1002.24	-0.4941	0.142219	-3.47423	0.000512326	0.00743673
chr16	67987746	68079320	DUS2	+	1268.62	-0.493951	0.12073	-4.09136	4.28854e-05	0.000986386
chr1	227730425	227735411	JMJD4	-	1438.98	-0.49376	0.137197	-3.5989	0.000319568	0.00513166
chr20	63659300	63698684	RTEL1-TNFRSF6B	+	2315.87	-0.492642	0.110362	-4.46387	8.04926e-06	0.000241205
chr1	236549005	236604516	HEATR1	-	9558.7	-0.492292	0.121567	-4.04955	5.13156e-05	0.00114409
chr22	29436534	29478868	RFPL1S	-	336.817	-0.492235	0.148444	-3.31595	0.000913308	0.0117863
chr22	31618491	31662221	PISD	-	3333.57	-0.492038	0.118729	-4.1442	3.40998e-05	0.00081142
chr13	36168794	36297842	CCDC169-SOHLH2	-	1813.12	-0.491946	0.113571	-4.33161	1.48023e-05	0.000408276
chr20	3753508	3767781	C20orf27	-	977.499	-0.490893	0.152362	-3.22188	0.00127352	0.0151622
chr15	45023147	45077185	SORD	+	820.814	-0.48983	0.156686	-3.12618	0.00177093	0.0196124
chr3	48856926	48898904	SLC25A20	-	520.707	-0.489555	0.158704	-3.08471	0.0020375	0.0216095
chr15	41387218	41409403	NDUFAF1	-	977.527	-0.489197	0.13753	-3.55702	0.000375081	0.00581172
chr2	55634061	55693863	PNPT1	-	5306.63	-0.488012	0.132463	-3.68412	0.00022949	0.00390239
chr6	99520976	99589899	TSTD3	+	822.646	-0.487362	0.135392	-3.59964	0.000318662	0.00512176
chr19	12891160	12914207	GCDH	+	1228.5	-0.487069	0.118993	-4.09326	4.2535e-05	0.000980468
chr9	23690104	23826337	ELAVL2	-	1517.47	-0.487056	0.156815	-3.10592	0.00189686	0.0205999
chr5	73565443	73583380	UTP15	+	2231.18	-0.486809	0.150436	-3.23599	0.0012122	0.0145992
chr9	98069275	98119222	TRIM14	-	355.223	-0.486734	0.16122	-3.01906	0.00253557	0.0255144
chr14	105472962	105480162	CRIP2	+	1564.3	-0.484801	0.159838	-3.03307	0.00242078	0.0245832
chr12	911736	990053	RAD52	-	1047.36	-0.484484	0.121574	-3.98509	6.74553e-05	0.00141808
chr8	37843268	37849861	BRF2	-	361.627	-0.483973	0.151076	-3.20351	0.00135764	0.0159914
chr9	96235331	96352058	ENSG00000285269	-	753.979	-0.483643	0.139353	-3.47064	0.000519218	0.00751209
chr15	33858782	34075155	AVEN	-	1832.83	-0.483602	0.173553	-2.78647	0.00532853	0.0441563
chr19	47778677	47784686	SELENOW	+	794.193	-0.483001	0.161954	-2.98233	0.00286064	0.0280045
chr1	112466541	112530165	WNT2B	+	262.342	-0.48286	0.168656	-2.86299	0.00419661	0.0372531
chrX	130202707	130268899	ZNF280C	-	578.943	-0.482858	0.154763	-3.11998	0.00180864	0.0199481
chr1	70144805	70205579	LRRC40	-	5425.5	-0.482385	0.114625	-4.20837	2.57215e-05	0.000642048
chr7	19695461	19709037	POLR1F	-	1806.07	-0.481618	0.125619	-3.83395	0.000126101	0.00237429
chr17	47941506	47949308	PNPO	+	855.696	-0.481065	0.167449	-2.87291	0.00406711	0.0363531
chr16	2039815	2047866	NTHL1	-	1097.62	-0.479969	0.147607	-3.25166	0.00114734	0.0139897
chr1	45326895	45328710	HPDL	+	1110.33	-0.479757	0.156551	-3.06454	0.00218006	0.0227179
chr7	44983019	44986961	SNHG15	-	1383.8	-0.479617	0.139729	-3.43248	0.000598099	0.00846628
chr2	32628032	32821051	TTC27	+	2887.71	-0.479259	0.131901	-3.63347	0.000279637	0.00459478
chr17	28041737	28196381	NLK	+	3645.45	-0.478798	0.163959	-2.92022	0.00349783	0.0325857
chr1	63367575	63438553	ALG6	+	2896.45	-0.477954	0.11991	-3.98594	6.72125e-05	0.00141466
chr13	102784281	102798976	POGLUT2	-	401.353	-0.47776	0.14507	-3.2933	0.000990179	0.0125674
chr7	100300020	100336307	PMS2P1	-	306.085	-0.477759	0.152173	-3.13957	0.00169196	0.018939
chr2	61145068	61164828	C2orf74	+	375.03	-0.477719	0.144457	-3.307	0.000943021	0.0120641
chr17	42824385	42843760	PSME3	+	2771.94	-0.477511	0.136592	-3.49588	0.000472497	0.00703769
chr12	6375045	6391571	LTBR	+	2864.93	-0.477178	0.146042	-3.26742	0.00108534	0.01351
chr6	18128311	18155077	TPMT	-	1443.59	-0.47705	0.118751	-4.01723	5.88873e-05	0.00127272
chr18	23598926	23662911	ANKRD29	-	210.683	-0.476958	0.168751	-2.82641	0.00470734	0.0405849
chr16	68843531	69085182	TANGO6	+	2764.68	-0.476771	0.138909	-3.43225	0.000598604	0.00846665
chr5	32689070	32791724	NPR3	+	15339.1	-0.476041	0.128164	-3.71432	0.000203753	0.00357023
chr22	38468078	38483447	KDELR3	+	566.144	-0.474867	0.164775	-2.88191	0.0039527	0.0355784
chr6	106629578	106668417	QRSL1	+	1909.44	-0.474267	0.132715	-3.57357	0.000352146	0.00551699
chr6	41905354	41921139	MED20	-	660.796	-0.47352	0.135333	-3.49892	0.000467154	0.00701128
chr8	8234341	8244667	ALG1L13P	-	1353.09	-0.473114	0.12774	-3.70373	0.000212449	0.00368677
chr3	170888418	170908644	EIF5A2	-	304.598	-0.472758	0.160882	-2.93855	0.00329752	0.0310768
chr3	178960121	179072215	ZMAT3	-	2649.58	-0.472701	0.140573	-3.36268	0.000771893	0.0102841
chr12	94306449	94459988	CEP83	-	2054.23	-0.472624	0.158083	-2.98972	0.00279232	0.0275339
chr2	188291669	188595931	GULP1	+	1362.88	-0.471622	0.169259	-2.7864	0.00532973	0.0441563
chr4	122826708	122898236	FGF2	+	827.633	-0.4711	0.154429	-3.0506	0.00228385	0.0234516
chr6	34417454	34426069	RPS10	-	1221.49	-0.471082	0.126311	-3.72953	0.000191838	0.003389
chr5	132311285	132370170	MIR3936HG	-	1905.05	-0.470456	0.170091	-2.76591	0.00567638	0.0459938
chr10	119140767	119165714	SFXN4	-	1934.34	-0.470091	0.131529	-3.57404	0.000351521	0.00551454
chr17	77958703	78108822	TNRC6C	+	304.122	-0.470048	0.170013	-2.76478	0.00569607	0.0461111
chr14	31446036	31457506	DTD2	-	762.672	-0.469566	0.155926	-3.01146	0.00259991	0.0260433
chr19	11384341	11419328	RGL3	-	489.437	-0.46907	0.160401	-2.92436	0.00345166	0.0322886
chr6	30058899	30064909	POLR1H	+	723.66	-0.469065	0.163827	-2.86317	0.00419422	0.0372531
chr17	81703367	81707517	MRPL12	+	2767.91	-0.468693	0.153352	-3.05632	0.00224069	0.0231534
chr12	106357748	106510198	POLR3B	+	1961.2	-0.468251	0.111269	-4.20828	2.57326e-05	0.000642048
chr21	28872191	28885371	N6AMT1	-	401.335	-0.468203	0.147724	-3.16945	0.00152727	0.0175111
chr1	43970000	43973369	DPH2	+	1730.96	-0.467727	0.143833	-3.25187	0.0011465	0.013989
chr5	60866454	60945073	ERCC8	-	1365.34	-0.466804	0.133194	-3.5047	0.000457125	0.00689588
chr1	120150898	120176520	SEC22B	-	3068.88	-0.466744	0.13345	-3.49751	0.000469619	0.00701604
chr1	15490832	15526534	CASP9	-	753.149	-0.466521	0.139933	-3.33388	0.000856444	0.0111914
chr12	109023089	109088023	USP30	+	395.566	-0.465549	0.141144	-3.29839	0.000972403	0.0123862
chr17	36601583	36608964	MRM1	+	791.776	-0.464906	0.136699	-3.40094	0.000671556	0.00925418
chr11	67303478	67312607	SSH3	+	478.749	-0.464162	0.135389	-3.42836	0.000607238	0.00854775
chr8	143289676	143299952	ZNF696	+	596.596	-0.463993	0.146267	-3.17224	0.00151267	0.0174091
chr19	10310045	10316015	FDX2	-	749.532	-0.46397	0.144073	-3.22038	0.00128019	0.0152211
chr5	79612120	79688246	TENT2	+	3575.88	-0.463603	0.141553	-3.27513	0.00105614	0.013243
chr5	139647299	139683882	CXXC5	+	707.918	-0.462976	0.144346	-3.2074	0.00133941	0.0157977
chr2	112541915	112579818	POLR1B	+	4124.22	-0.46282	0.137839	-3.35769	0.000785975	0.0104403
chr17	42950526	42980528	PTGES3L-AARSD1	-	1320.93	-0.46281	0.134135	-3.45033	0.0005599	0.00798954
chr7	98214624	98252232	TECPR1	-	538.164	-0.462676	0.135958	-3.40307	0.000666333	0.00919654
chr19	32405543	32485895	DPY19L3	+	1235.84	-0.462125	0.134677	-3.43135	0.000600577	0.00848479
chr12	55997180	56006641	SUOX	+	644.414	-0.461553	0.154418	-2.98899	0.00279899	0.0275842
chr10	133355158	133358025	FUOM	-	563.551	-0.461489	0.150408	-3.06824	0.00215324	0.0225529
chr5	122843439	123029354	SNX24	+	1608.74	-0.460432	0.168567	-2.73145	0.00630559	0.0497691
chr7	66995173	67239514	TYW1	+	1345.1	-0.460257	0.126433	-3.64031	0.000272312	0.0044995
chr3	142465315	142472337	ENSG00000244327	-	420.534	-0.460235	0.144677	-3.18111	0.0014671	0.0170534
chr1	182789293	182830384	NPL	+	295.961	-0.460081	0.156218	-2.94513	0.00322822	0.0305846
chr20	646615	653200	SRXN1	-	2107	-0.460008	0.142378	-3.23089	0.00123407	0.0148222
chr20	646626	675800	ENSG00000270299	-	2108.99	-0.459888	0.142427	-3.22895	0.00124245	0.0148825
chr2	111006015	111523376	MIR4435-2HG	-	996.975	-0.459848	0.146614	-3.13645	0.00171009	0.0190994
chr9	128819651	128829794	SPOUT1	-	1631.53	-0.459502	0.134977	-3.4043	0.000663333	0.00916945
chr17	50478860	50485974	RSAD1	+	1056.15	-0.456731	0.135198	-3.37822	0.00072956	0.0098538
chr6	110958706	110967890	GTF3C6	+	1800.6	-0.456107	0.160298	-2.84536	0.00443608	0.0389037
chr6	143843338	143863812	LTV1	+	2540.75	-0.456028	0.113988	-4.00067	6.31643e-05	0.0013471
chr1	154962298	154974395	SHC1	-	3924.38	-0.455668	0.146987	-3.10006	0.00193483	0.0208203
chr2	53767804	53775196	CHAC2	+	706.304	-0.45533	0.131242	-3.46938	0.000521665	0.00754133
chr12	63779833	63809792	RXYLT1	+	822.448	-0.454645	0.133973	-3.39356	0.000689897	0.00945533
chr10	93667883	93702592	FRA10AC1	-	910.85	-0.454458	0.125181	-3.6304	0.000282984	0.00464116
chr19	34404399	34426168	PDCD2L	+	527.336	-0.453668	0.153427	-2.95689	0.00310758	0.0297144
chr4	70704204	70808619	RUFY3	+	1260.83	-0.453257	0.142553	-3.17958	0.00147488	0.0171214
chr3	129893811	129918578	TMCC1-DT	+	370.239	-0.453178	0.142548	-3.17912	0.00147721	0.0171372
chr14	39114285	39136973	GEMIN2	+	578.339	-0.452919	0.152156	-2.97667	0.00291398	0.0284322
chr17	43800799	43833170	MPP3	-	2002.45	-0.452394	0.133489	-3.389	0.000701468	0.00956203
chr1	38862493	38873368	MYCBP	-	1377.37	-0.452065	0.140602	-3.2152	0.00130352	0.015422
chr8	73290242	73295789	RPL7	-	487.981	-0.451529	0.13619	-3.31544	0.000915006	0.0117882
chr18	35452230	35497979	INO80C	-	603.29	-0.451424	0.15612	-2.89151	0.0038339	0.0349162
chr18	23197144	23437961	TMEM241	-	710.155	-0.451338	0.14794	-3.05082	0.00228216	0.0234516
chr14	58427385	58551297	KIAA0586	+	2003.95	-0.450449	0.114122	-3.94709	7.91069e-05	0.0016244
chr1	154983338	154993111	FLAD1	+	1628.13	-0.450182	0.144357	-3.11853	0.00181753	0.0200166
chr17	74862497	74873031	FDXR	-	716.334	-0.450086	0.160673	-2.80125	0.00509051	0.0426946
chr6	87590067	87667453	ORC3	+	2147.23	-0.449112	0.126268	-3.5568	0.000375395	0.00581172
chr17	75525080	75575209	LLGL2	+	3014.3	-0.449055	0.133622	-3.36065	0.000777597	0.0103446
chr12	39293228	39443390	KIF21A	-	4623.47	-0.448943	0.113509	-3.95514	7.64899e-05	0.00157799
chr6	32821833	32838739	TAP2	-	1222.64	-0.448855	0.158899	-2.82478	0.00473134	0.0406858
chr1	23706901	23778325	ELOA-AS1	-	295.362	-0.44877	0.156282	-2.87154	0.00408477	0.0364741
chr17	30248203	30292056	BLMH	-	1637.83	-0.448748	0.125064	-3.58815	0.000333034	0.00529357
chr3	53088483	53130453	RFT1	-	1340.28	-0.448471	0.115253	-3.8912	9.97507e-05	0.00197049
chr11	117178736	117197445	SIDT2	+	934.904	-0.448443	0.144484	-3.10374	0.00191088	0.0206434
chr2	226835581	226999215	RHBDD1	+	831.048	-0.448295	0.159748	-2.80625	0.00501214	0.0422377
chr12	51093656	51173135	TFCP2	-	2297.1	-0.44823	0.128545	-3.48696	0.000488552	0.007198
chr18	35443871	35497940	ENSG00000267140	-	608.319	-0.447363	0.155982	-2.86803	0.00413031	0.0367879
chr12	108562582	108569368	ISCU	+	1739.34	-0.447341	0.13628	-3.28251	0.00102887	0.0129746
chr9	124658412	124698635	MIR181A2HG	+	494.096	-0.447252	0.148492	-3.01195	0.00259573	0.0260162
chr17	19648136	19685760	ALDH3A2	+	4814.27	-0.445996	0.144286	-3.09105	0.00199451	0.0213326
chr6	32813767	32838822	ENSG00000250264	-	1241.43	-0.444212	0.157668	-2.81739	0.00484163	0.0413327
chr6	57172326	57189833	BAG2	+	3483.91	-0.443897	0.126906	-3.49783	0.000469059	0.00701604
chr4	78887127	78939438	PAQR3	-	584.282	-0.443701	0.13982	-3.17336	0.00150683	0.0173782
chr19	10602457	10644557	SLC44A2	+	1815.37	-0.44353	0.150348	-2.95003	0.00317738	0.0302185
chr9	4984390	5129948	JAK2	+	1895.06	-0.44339	0.145067	-3.05644	0.0022398	0.0231534
chr1	74198235	74544393	FPGT-TNNI3K	+	1241.39	-0.442772	0.126617	-3.49693	0.000470646	0.00701604
chr1	85649417	85708433	ZNHIT6	-	3970.56	-0.44264	0.122698	-3.60755	0.000309102	0.00499079
chr3	183919934	184017939	ABCC5	-	2966.2	-0.442544	0.111609	-3.96512	7.33577e-05	0.00152047
chr1	74198238	74234086	FPGT	+	1235.99	-0.441931	0.126862	-3.48355	0.000494813	0.00726602
chr11	8612037	8682694	TRIM66	-	1034.06	-0.4419	0.14838	-2.97816	0.00289986	0.0283257
chr10	125823546	125853695	BCCIP	+	3020.15	-0.441892	0.120304	-3.67314	0.000239588	0.00404576
chr1	222815022	223005995	DISP1	+	3888.63	-0.441745	0.152742	-2.8921	0.00382671	0.0348923
chr3	3126933	3153435	TRNT1	+	2629.34	-0.440133	0.117216	-3.75487	0.000173429	0.0031352
chr3	126704240	126960420	CHCHD6	+	1494.37	-0.439566	0.15131	-2.90507	0.00367174	0.0338106
chr8	30729131	30767006	UBXN8	+	1144.41	-0.439098	0.129447	-3.39211	0.000693568	0.00948359
chr14	77708071	77761104	SLIRP	+	1691.24	-0.438823	0.151939	-2.88815	0.00387514	0.0351887
chr20	38962299	39039723	DHX35	+	1739.97	-0.438784	0.112283	-3.90784	9.31261e-05	0.00186252
chr2	68157888	68176238	PNO1	+	1442.2	-0.438675	0.143113	-3.06524	0.00217494	0.0226861
chr14	35121846	35277622	PRORP	+	2345.62	-0.438627	0.115411	-3.80057	0.000144364	0.00266148
chr2	202874261	203014798	WDR12	-	2416.88	-0.437702	0.133685	-3.27414	0.00105984	0.01328
chr20	13714322	13784919	ESF1	-	1389.9	-0.437072	0.141595	-3.08677	0.00202341	0.0215117
chr2	162318840	162371595	GCA	+	439.187	-0.436688	0.151338	-2.88551	0.00390775	0.0353578
chr3	114005833	114088422	QTRT2	+	2931.87	-0.436392	0.118332	-3.68787	0.000226137	0.00386281
chr12	104986316	105074197	NOPCHAP1	+	1370.97	-0.436247	0.134491	-3.24369	0.0011799	0.0143176
chr12	30709552	30823302	CAPRIN2	-	943.076	-0.435979	0.117937	-3.69672	0.000218403	0.00377086
chr12	29500840	29784759	TMTC1	-	3003.46	-0.43566	0.117808	-3.69805	0.000217264	0.00375854
chr2	105038069	105099960	MRPS9	+	2332.38	-0.435487	0.123295	-3.53207	0.000412318	0.00631632
chr5	139274102	139284899	SNHG4	+	3545.85	-0.43539	0.147871	-2.94439	0.00323594	0.0305943
chr6	78867551	78946440	IRAK1BP1	+	653.252	-0.434695	0.147608	-2.94494	0.00323019	0.0305846
chr7	12330885	12403941	VWDE	-	939.156	-0.434561	0.150774	-2.8822	0.00394911	0.0355681
chrX	54530183	54621521	GNL3L	+	4157.81	-0.43443	0.120069	-3.61816	0.000296705	0.00483034
chr11	65314866	65322417	CDC42EP2	+	582.067	-0.43391	0.15656	-2.77153	0.00557932	0.0455623
chr1	145964690	145978848	POLR3GL	+	379.999	-0.433461	0.144832	-2.99285	0.00276382	0.0272985
chr1	11054584	11060020	SRM	-	1238.47	-0.433159	0.152277	-2.84455	0.00444739	0.038945
chr10	97356358	97426076	RRP12	-	3809.74	-0.433143	0.157174	-2.75581	0.00585468	0.046965
chr2	55287842	55419895	CCDC88A	-	4107.88	-0.432901	0.120586	-3.58996	0.000330726	0.00526778
chr6	31777518	31795752	VARS1	-	7595.14	-0.432819	0.151054	-2.86532	0.00416588	0.0370674
chr11	88265069	88359684	CTSC	-	4048.2	-0.432789	0.117602	-3.68013	0.000233119	0.00394693
chr1	94974405	95072951	ALG14	-	1073.49	-0.431494	0.124321	-3.47081	0.000518896	0.00751209
chr1	944203	959309	NOC2L	-	5456.55	-0.431428	0.157308	-2.74256	0.00609621	0.0484845
chr8	107249482	107498055	ANGPT1	-	994.469	-0.430097	0.131741	-3.26472	0.00109573	0.0135912
chrX	101390824	101396155	RPL36A	+	605.693	-0.42996	0.144664	-2.97212	0.00295747	0.0286667
chr2	3188925	3377830	EIPR1	-	1262.69	-0.429864	0.119668	-3.59215	0.000327963	0.00523321
chr6	26365159	26378320	BTN3A2	+	668.049	-0.428781	0.133344	-3.2156	0.00130171	0.0154148
chr1	100989623	101026088	DPH5	-	4801.85	-0.428128	0.110912	-3.86006	0.000113361	0.00217736
chr4	25312774	25370383	ZCCHC4	+	791.652	-0.427761	0.14166	-3.01962	0.00253088	0.0254818
chr2	190880821	190965552	GLS	+	3576.34	-0.427066	0.114051	-3.74451	0.000180749	0.00324606
chr2	169528508	169573875	FASTKD1	-	1282.54	-0.426964	0.116274	-3.67204	0.000240619	0.00405156
chr7	80742538	80922359	SEMA3C	-	4421.05	-0.426953	0.116826	-3.65462	0.000257566	0.004296
chr6	143857318	143938471	ENSG00000280148	+	1713.28	-0.426945	0.121749	-3.50675	0.000453614	0.00685462
chr11	60842113	60851081	CCDC86	+	1820.31	-0.424149	0.142692	-2.97248	0.00295404	0.0286492
chr1	111439890	111449256	WDR77	-	4814.62	-0.424104	0.145106	-2.92271	0.00346998	0.0324256
chr17	39687914	39730426	ERBB2	+	4567.66	-0.424072	0.118806	-3.56946	0.000357712	0.00558688
chr15	82750564	82757206	SNHG21	+	504.137	-0.423823	0.151458	-2.79828	0.00513762	0.0429222
chr2	28894667	28948219	WDR43	+	9027.79	-0.423811	0.123683	-3.42658	0.000611228	0.00859024
chr2	160272151	160493807	RBMS1	-	3781.13	-0.422792	0.142813	-2.96045	0.00307186	0.0294366
chr19	45349837	45370918	ERCC2	-	1662.42	-0.422722	0.142655	-2.96324	0.00304414	0.029298
chr9	74980790	75028423	CARNMT1	-	2006.68	-0.422445	0.128229	-3.29445	0.000986144	0.0125342
chr15	45631148	45691281	SQOR	+	923.378	-0.421443	0.14805	-2.84662	0.0044186	0.0388827
chr12	6556863	6568691	NOP2	-	3650.93	-0.421317	0.132711	-3.1747	0.0014999	0.0173208
chr2	197500140	197503449	HSPE1	+	2047.22	-0.421164	0.136652	-3.08203	0.00205593	0.0217658
chrM	9207	9990	MT-CO3	+	21197.1	-0.420337	0.136453	-3.08045	0.0020669	0.0218297
chr1	77979175	78017964	DNAJB4	+	5524.29	-0.419836	0.122913	-3.41573	0.000636118	0.00886953
chr2	223667680	223838027	AP1S3	-	926.215	-0.419682	0.134873	-3.11169	0.0018602	0.0203099
chr9	128819663	128881931	ENSG00000286112	-	3205.63	-0.419621	0.113938	-3.6829	0.000230599	0.00391155
chr10	102132994	102150333	PPRC1	+	2561.59	-0.419398	0.11219	-3.73829	0.000185274	0.00330873
chr3	142449007	142578733	ATR	-	6862.65	-0.418986	0.120229	-3.4849	0.000492314	0.0072363
chr17	77086716	77099902	SNHG20	+	1282.53	-0.418723	0.134383	-3.11589	0.00183389	0.0201354
chr1	74705482	74733408	CRYZ	-	2579.06	-0.417993	0.148834	-2.80844	0.00497815	0.0420515
chr2	24067586	24076373	SF3B6	-	1951.12	-0.417991	0.148219	-2.8201	0.00480093	0.0411158
chr2	55236595	55269347	MTIF2	-	3121.36	-0.417927	0.132306	-3.1588	0.00158422	0.0180035
chr8	30831544	30913008	TEX15	-	2134.56	-0.417815	0.123948	-3.3709	0.000749229	0.010058
chr4	101023409	101348278	PPP3CA	-	5198.81	-0.417735	0.148601	-2.81112	0.00493694	0.0418433
chr8	129839593	130017504	CYRIB	-	6237.21	-0.41653	0.120827	-3.44732	0.000566175	0.00805956
chr1	212363928	212414901	PACC1	-	595.22	-0.416035	0.126946	-3.27726	0.00104819	0.0131807
chr12	6970913	6979936	EMG1	+	3268.35	-0.415257	0.138581	-2.9965	0.00273095	0.0270191
chr14	31334312	31457441	ENSG00000203546	-	8884.66	-0.415034	0.131178	-3.16389	0.00155673	0.0177699
chr8	143612618	143618048	GFUS	-	1943.22	-0.414937	0.13605	-3.04988	0.00228935	0.0234777
chr17	8247618	8270491	PFAS	+	5853.29	-0.414876	0.130842	-3.17082	0.00152009	0.0174515
chr11	62851978	62855953	SNHG1	-	3969.42	-0.414566	0.114356	-3.62524	0.000288696	0.00470863
chr11	125893485	125903221	PUS3	-	470.095	-0.414532	0.14567	-2.84569	0.00443149	0.0388827
chr11	90200429	90223077	CHORDC1	-	4223.58	-0.414241	0.116893	-3.54378	0.00039444	0.00606936
chr5	138946724	139293557	SIL1	-	3013.93	-0.413486	0.12296	-3.36277	0.000771634	0.0102841
chr11	103109410	103479863	DYNC2H1	+	2912.63	-0.412981	0.131957	-3.12966	0.00175008	0.0194356
chr7	64519878	64563075	ZNF680	-	1347.23	-0.412604	0.146853	-2.80963	0.00495977	0.0419769
chr3	123201927	123274136	SEC22A	+	1263.27	-0.412446	0.142249	-2.89947	0.00373794	0.0342403
chr17	2405562	2511891	METTL16	-	2646.21	-0.411997	0.117901	-3.49442	0.000475091	0.00706443
chr14	67240713	67336061	PALS1	+	3189.98	-0.411887	0.129287	-3.18584	0.00144334	0.0168327
chr2	37231631	37253403	NDUFAF7	+	1284.8	-0.411295	0.121736	-3.37859	0.000728594	0.00984827
chr13	20777329	20903048	XPO4	-	4434.66	-0.410817	0.119738	-3.43097	0.000601419	0.00848479
chr8	91070196	91087095	OTUD6B	+	1544.11	-0.410609	0.122491	-3.35216	0.000801829	0.0106269
chr3	38496127	38542161	EXOG	+	616.933	-0.410192	0.13311	-3.08159	0.00205898	0.0217719
chr7	105532169	105567677	RINT1	+	1632.44	-0.409224	0.122862	-3.33075	0.000866112	0.0112844
chr5	69280175	69332809	CCDC125	-	819.784	-0.408822	0.123102	-3.32099	0.000896978	0.011618
chr12	132710819	132722734	PGAM5	+	4268.43	-0.408562	0.138389	-2.95228	0.00315438	0.0300969
chr12	6970921	6997428	ENSG00000290146	+	3500.82	-0.40847	0.134479	-3.03743	0.00238603	0.0242861
chr10	92826831	93059493	EXOC6	+	2493.82	-0.408444	0.128809	-3.17094	0.00151947	0.0174515
chr4	109713916	109801999	ENSG00000285330	-	602.076	-0.408255	0.136792	-2.98448	0.00284056	0.0278852
chr5	62347284	62403943	DIMT1	-	1748.82	-0.408216	0.145813	-2.79958	0.00511693	0.0428349
chr11	123723914	123741675	ZNF202	-	702.712	-0.407946	0.135312	-3.01486	0.00257101	0.025783
chr17	43398993	43401137	ARL4D	+	576.974	-0.40742	0.144042	-2.82848	0.00467703	0.0403759
chr9	125200542	125234161	RABEPK	+	1404.95	-0.40717	0.144627	-2.81532	0.00487294	0.0415398
chr16	46796603	46831180	C16orf87	-	814.958	-0.407036	0.130255	-3.12492	0.00177856	0.0196653
chr12	120578764	120581402	POP5	-	1372.75	-0.40686	0.132983	-3.05948	0.00221718	0.0229776
chr15	78565520	78595269	CHRNA5	+	805.695	-0.406456	0.131572	-3.08923	0.00200677	0.0213992
chr7	996986	1138260	C7orf50	-	2215	-0.406132	0.115487	-3.5167	0.000436949	0.00662544
chr8	38263130	38269243	PLPP5	-	403.706	-0.405755	0.139191	-2.91509	0.00355588	0.0329869
chr16	760734	768865	MSLN	+	3923.96	-0.405146	0.137006	-2.95714	0.00310507	0.0297066
chr14	31291788	31420550	HEATR5A	-	13282.4	-0.404178	0.129293	-3.12606	0.00177166	0.0196124
chr19	10305427	10316009	ENSG00000167807	-	829.964	-0.403673	0.13996	-2.88421	0.003924	0.0354503
chr13	49660674	49691486	EBPL	-	1149.46	-0.402662	0.127814	-3.15037	0.00163064	0.0184044
chr1	246540561	246566261	TFB2M	-	1668.87	-0.402624	0.144817	-2.78023	0.00543211	0.044732
chr12	48337180	48351414	ZNF641	-	1424.37	-0.40151	0.129316	-3.10488	0.00190357	0.0206346
chr3	149517235	149736714	WWTR1	-	5413.01	-0.400569	0.133187	-3.00756	0.00263353	0.0262539
chr20	2652593	2658393	NOP56	+	6090.27	-0.400516	0.118496	-3.37999	0.000724879	0.00982789
chr3	9917074	9933630	IL17RC	+	1423.39	-0.400447	0.140341	-2.85339	0.00432553	0.0381804
chr11	78435620	78575194	NARS2	-	2356.85	-0.399468	0.142576	-2.80179	0.00508193	0.0426429
chr12	132144457	132152473	NOC4L	+	1106.44	-0.399322	0.141955	-2.81301	0.00490796	0.0417176
chr5	72320367	72368395	PTCD2	+	1054.54	-0.399264	0.118675	-3.36436	0.000767202	0.0102603
chr1	109090764	109096934	TMEM167B	+	1121.27	-0.399104	0.138041	-2.89119	0.00383789	0.0349222
chr17	82018702	82024107	CENPX	-	2723.09	-0.398451	0.136586	-2.91722	0.00353166	0.0328285
chr2	84821650	84907008	TRABD2A	-	3024.13	-0.397802	0.10537	-3.77529	0.000159824	0.00291007
chr8	143603210	143609773	PYCR3	-	868.011	-0.397187	0.141555	-2.80589	0.00501782	0.0422452
chr8	25184689	25418082	DOCK5	+	10472.5	-0.396904	0.133031	-2.98354	0.00284936	0.0279486
chr6	99432325	99521728	USP45	-	1238.7	-0.396771	0.142744	-2.7796	0.00544261	0.0447605
chr7	90335223	90391453	GTPBP10	+	1295.47	-0.396685	0.11859	-3.34501	0.000822811	0.01084
chr1	211571568	211579161	SLC30A1	-	5401.56	-0.396658	0.112138	-3.53723	0.000404351	0.00620566
chr3	172630249	172711218	NCEH1	-	1570.5	-0.396178	0.115473	-3.43093	0.000601524	0.00848479
chr3	148991408	149031775	GYG1	+	1014.49	-0.396124	0.139491	-2.83977	0.00451457	0.0392996
chr6	142301854	142446266	ADGRG6	+	1507.19	-0.395672	0.13698	-2.88855	0.00387023	0.0351622
chr7	51016212	51316818	COBL	-	6449.65	-0.39546	0.143227	-2.76108	0.00576106	0.0465519
chr16	1363205	1414751	UNKL	-	2359.79	-0.395193	0.136932	-2.88606	0.00390099	0.0353509
chr14	103121476	103137439	TNFAIP2	+	1702.62	-0.39508	0.139066	-2.84095	0.00449789	0.0392004
chr21	32311018	32393012	URB1	-	6908.88	-0.394527	0.100782	-3.91466	9.05329e-05	0.00181271
chr3	120684938	120742993	RABL3	-	1066.39	-0.394339	0.122338	-3.22335	0.00126701	0.0150948
chr1	77979542	78138444	GIPC2	+	5807.01	-0.394144	0.124124	-3.17542	0.00149621	0.0173009
chr14	81260652	81436465	STON2	-	3825.73	-0.393866	0.114376	-3.44359	0.000574047	0.00815192
chr1	156721891	156728766	ISG20L2	-	1113.44	-0.393639	0.129017	-3.05106	0.00228031	0.0234516
chrX	57592011	57597477	ZXDB	+	2083.84	-0.39299	0.127601	-3.07985	0.00207108	0.0218346
chr8	37736601	37758422	ERLIN2	+	1415.2	-0.392517	0.128946	-3.04406	0.00233411	0.0238645
chr15	55611544	55743152	PRTG	-	1620.03	-0.392391	0.139145	-2.82001	0.00480227	0.0411158
chr12	51351247	51392867	GALNT6	-	3319.33	-0.392248	0.127797	-3.06931	0.00214555	0.0224974
chr2	112211529	112255136	ZC3H8	-	1311.36	-0.392147	0.134524	-2.91506	0.00355617	0.0329869
chr1	100266216	100292769	RTCA	+	5130.79	-0.391954	0.113041	-3.46735	0.000525609	0.0075857
chr22	50217689	50245023	TUBGCP6	-	1840.66	-0.391881	0.123978	-3.16088	0.00157291	0.0179067
chr8	108443601	108489196	EMC2	+	1878.71	-0.391827	0.125349	-3.12589	0.00177266	0.0196124
chr7	16753755	16784536	TSPAN13	+	2704.91	-0.391781	0.122766	-3.19128	0.00141645	0.0165846
chr14	60971441	60981170	TRMT5	-	708.121	-0.391245	0.137858	-2.83802	0.00453945	0.0394774
chr6	87408012	87511634	ENSG00000213204	+	656.941	-0.390825	0.127323	-3.06955	0.00214383	0.0224974
chr14	77426675	77457952	VIPAS39	-	558.059	-0.390716	0.140496	-2.78097	0.00541967	0.0446712
chr4	109709989	109730070	PLA2G12A	-	926.094	-0.390304	0.120102	-3.24976	0.00115502	0.0140542
chr9	132592997	132670401	DDX31	-	2634.91	-0.389837	0.1149	-3.39285	0.000691695	0.00946543
chr14	52775193	52791668	GNPNAT1	-	3278.43	-0.389137	0.120896	-3.21879	0.00128735	0.0152754
chr17	34980512	35009743	LIG3	+	3260.35	-0.388687	0.111959	-3.47169	0.000517194	0.00749507
chr7	37920640	37951936	EPDR1	+	929.69	-0.388677	0.136625	-2.84484	0.00444335	0.0389288
chr3	46979666	47009704	NBEAL2	+	1411.73	-0.38833	0.128141	-3.03048	0.00244166	0.0247385
chr2	189441446	189475552	WDR75	+	3230.95	-0.388108	0.125755	-3.08623	0.00202713	0.0215382
chr3	142964497	143060725	U2SURP	+	13602.2	-0.387644	0.113562	-3.41351	0.00064132	0.00892798
chr22	20982269	20999032	LZTR1	+	1860.61	-0.387423	0.127	-3.05056	0.00228414	0.0234516
chr2	183117513	183161680	NUP35	+	1391.01	-0.386853	0.131375	-2.94465	0.00323318	0.0305846
chr16	56451521	56479104	OGFOD1	+	3106.35	-0.386819	0.138026	-2.8025	0.00507084	0.0425903
chr5	79976716	79991262	MTX3	-	1506.35	-0.386665	0.118558	-3.26141	0.00110861	0.0136873
chr5	132692628	132737638	KIF3A	-	754.467	-0.386498	0.132916	-2.90784	0.00363931	0.0335645
chr11	3087107	3166739	OSBPL5	-	3105.1	-0.386472	0.125475	-3.08007	0.00206953	0.0218313
chr12	4487735	4538508	C12orf4	-	1063.44	-0.386426	0.132626	-2.91365	0.00357231	0.0330682
chr1	62784132	62865516	ATG4C	+	1619.6	-0.386033	0.124045	-3.11203	0.00185804	0.0203045
chr6	107065182	107115515	BEND3	-	868.829	-0.385769	0.131312	-2.93781	0.00330543	0.0311277
chr7	104126341	104208047	ORC5	-	3015.44	-0.38482	0.126139	-3.05076	0.00228266	0.0234516
chr5	55256055	55307694	DHX29	-	4148.06	-0.38475	0.105428	-3.64942	0.000262829	0.00437011
chr4	74114174	74303099	MTHFD2L	+	886.87	-0.384263	0.140646	-2.73213	0.00629257	0.0497133
chr16	82147798	82170224	MPHOSPH6	-	981.906	-0.383873	0.133135	-2.88334	0.0039348	0.0355116
chr9	4792944	4885917	RCL1	+	2211.36	-0.38324	0.120497	-3.18049	0.00147024	0.0170788
chr10	30309801	30374448	MTPAP	-	2371.41	-0.38295	0.113664	-3.36913	0.000754046	0.0101073
chr18	62187255	62310249	RELCH	+	2888.7	-0.382637	0.109945	-3.48026	0.000500929	0.00731936
chr15	43369221	43409771	TUBGCP4	+	1849.39	-0.382474	0.121225	-3.15506	0.00160464	0.0181859
chr4	52590960	52659301	USP46	-	889.26	-0.381964	0.124386	-3.0708	0.00213485	0.0224401
chr17	4710596	4721499	ARRB2	+	770.922	-0.381843	0.133334	-2.86382	0.00418571	0.0372251
chr17	2755705	3037741	RAP1GAP2	+	4985.57	-0.381754	0.108938	-3.50433	0.000457751	0.00689944
chr6	83067666	83171350	DOP1A	+	1194.12	-0.381346	0.12254	-3.11201	0.00185818	0.0203045
chr22	20979462	20998121	ENSG00000285314	+	1598	-0.381319	0.128784	-2.96092	0.00306725	0.0294243
chr12	94895297	95003748	NDUFA12	-	1982.91	-0.381085	0.131558	-2.89672	0.00377091	0.0344368
chr1	66999350	67054148	SLC35D1	-	4497.31	-0.379635	0.105528	-3.59747	0.000321332	0.00514596
chr18	50879080	50954257	ME2	+	2492.56	-0.379124	0.124251	-3.05129	0.00227864	0.0234516
chr7	30424527	30478784	NOD1	-	1067.88	-0.37834	0.126154	-2.99904	0.00270833	0.0268555
chr1	92246402	92298987	GLMN	-	3276.67	-0.378314	0.137618	-2.74901	0.00597764	0.0476919
chr1	203861599	203871152	SNRPE	+	2013.22	-0.377554	0.135838	-2.77944	0.00544525	0.0447605
chr19	2997639	3047635	TLE2	-	1564.14	-0.377529	0.129269	-2.92049	0.00349478	0.0325857
chr19	13104902	13117567	TRMT1	-	4444.84	-0.377486	0.127898	-2.95146	0.00316276	0.0301496
chr7	38178245	38230670	STARD3NL	+	1231.61	-0.377417	0.119941	-3.1467	0.00165127	0.0185952
chr3	97941818	97972457	RIOX2	-	2181.29	-0.376984	0.126278	-2.98534	0.0028326	0.0278533
chr17	14069490	14231736	COX10	+	2106.24	-0.376911	0.133554	-2.82215	0.00477022	0.0409207
chr15	44537125	44563029	EIF3J	+	3935.98	-0.37684	0.116199	-3.24307	0.0011825	0.0143225
chr2	71130310	71150101	MPHOSPH10	+	2103.4	-0.376276	0.121457	-3.09801	0.00194824	0.0209518
chr14	96279195	96363341	ATG2B	-	1465.3	-0.375883	0.12666	-2.96766	0.00300077	0.0289534
chr2	42169353	42332548	EML4	+	9497.84	-0.375314	0.11202	-3.35041	0.00080692	0.0106704
chr4	47485275	47593486	ATP10D	+	1334.28	-0.374897	0.116267	-3.22445	0.00126214	0.0150571
chr2	121726945	121736911	NIFK	-	2353.33	-0.37464	0.134583	-2.7837	0.00537421	0.0443452
chr1	93866284	93879918	DNTTIP2	-	5982.98	-0.374596	0.132934	-2.81792	0.00483365	0.0412845
chr3	193593144	193697811	OPA1	+	7978.94	-0.374453	0.114583	-3.26796	0.00108326	0.0134999
chr11	3797724	3826371	PGAP2	+	1109.7	-0.374341	0.120118	-3.11644	0.00183048	0.0201262
chr9	128832942	128882494	KYAT1	-	1560.15	-0.373962	0.121459	-3.07891	0.0020776	0.0218903
chr1	193012250	193060080	UCHL5	-	5081.32	-0.373666	0.107186	-3.48616	0.000490016	0.00721355
chr7	103312289	103344830	DNAJC2	-	4172.19	-0.373632	0.13145	-2.8424	0.00447751	0.0391118
chr17	30477362	30527592	GOSR1	+	1959.8	-0.373587	0.117558	-3.17791	0.00148341	0.0171979
chr2	197486584	197516737	HSPD1	-	26197.3	-0.373113	0.134009	-2.78423	0.00536551	0.0443074
chr8	81656914	81686331	IMPA1	-	1948.81	-0.373065	0.119135	-3.13146	0.00173939	0.0193635
chr2	39249266	39437301	MAP4K3	-	3414.9	-0.372722	0.123063	-3.02871	0.002456	0.0248695
chr6	31827738	31830254	HSPA1B	+	2433.73	-0.372686	0.134113	-2.7789	0.00545428	0.0448103
chr13	45120510	45284893	GTF2F2	+	1682.66	-0.371378	0.118541	-3.1329	0.00173087	0.0192949
chr2	10302889	10427617	HPCAL1	+	2869.65	-0.371034	0.111341	-3.33241	0.00086097	0.0112422
chr16	23520754	23557731	EARS2	-	2105.08	-0.370991	0.130978	-2.83246	0.00461913	0.0400342
chr12	22448583	22544546	C2CD5	-	1611.88	-0.370969	0.134057	-2.76724	0.00565335	0.0458913
chr4	106315544	106349456	AIMP1	+	3020.66	-0.370765	0.121899	-3.04158	0.00235342	0.0240234
chr3	150602875	150630436	SELENOT	+	1301.39	-0.370412	0.119347	-3.10367	0.00191138	0.0206434
chr6	31815543	31817946	HSPA1A	+	3380.09	-0.369878	0.128668	-2.87467	0.0040445	0.0361932
chr20	11890723	11926609	BTBD3	+	11560.8	-0.369773	0.106632	-3.46774	0.000524857	0.00758127
chr16	3382081	3401065	ZSCAN32	-	743.954	-0.369714	0.123962	-2.98247	0.00285931	0.0280045
chr3	131462212	131502983	MRPL3	-	6795.85	-0.369678	0.124768	-2.96291	0.00304745	0.0292985
chr1	10456522	10472529	DFFA	-	2521.95	-0.369129	0.118962	-3.10291	0.00191627	0.0206835
chr3	100363431	100401089	TOMM70	-	5631.02	-0.36874	0.129787	-2.84111	0.00449566	0.0392004
chr4	112285509	112442621	ALPK1	+	515.955	-0.368181	0.131042	-2.80963	0.00495983	0.0419769
chr1	100133150	100150496	TRMT13	+	1954.52	-0.36807	0.125622	-2.92998	0.00338981	0.0318378
chr6	56457987	56954830	DST	-	6260.07	-0.367146	0.109896	-3.34085	0.000835215	0.0109707
chr17	63682336	63741986	STRADA	-	885.505	-0.366928	0.127367	-2.88087	0.00396573	0.0356452
chr19	10701430	10713437	QTRT1	+	1471.51	-0.366277	0.129958	-2.81842	0.00482609	0.0412598
chr1	225486765	225653142	ENAH	-	8425.79	-0.366054	0.105175	-3.48044	0.000500591	0.00731936
chr7	100826820	100867010	SLC12A9	+	910.657	-0.365731	0.124234	-2.94389	0.00324112	0.0306269
chr13	52412602	52450634	VPS36	-	2139.79	-0.365359	0.117627	-3.10609	0.00189576	0.0205999
chr10	110919367	111017307	SHOC2	+	4979.79	-0.365247	0.123827	-2.94966	0.00318119	0.0302221
chr2	202265736	202303661	NOP58	+	6902.87	-0.365136	0.125067	-2.91952	0.00350567	0.0326212
chr3	45388561	45554726	LARS2	+	4684.01	-0.36356	0.111451	-3.26205	0.0011061	0.0136755
chr11	119096025	119108331	DPAGT1	-	709.666	-0.363392	0.131056	-2.7728	0.00555756	0.0454476
chr22	24952716	25197448	KIAA1671	+	5192.89	-0.363032	0.118097	-3.07403	0.00211189	0.0222252
chr17	75109952	75130272	ARMC7	+	622.622	-0.36257	0.131237	-2.7627	0.00573255	0.0463639
chr5	7851186	7906025	MTRR	+	5717.11	-0.362389	0.116317	-3.11552	0.00183619	0.0201354
chr5	95461755	95555050	TTC37	-	8328.51	-0.361774	0.103602	-3.49195	0.000479499	0.00710764
chr11	18069935	18106087	SAAL1	-	959.16	-0.361657	0.122489	-2.95258	0.00315135	0.0300842
chr12	121712752	121783001	TMEM120B	+	1766.87	-0.359795	0.125528	-2.86627	0.00415345	0.0369753
chr2	237967014	238099412	UBE2F-SCLY	+	1932.31	-0.359406	0.117802	-3.05094	0.00228124	0.0234516
chr16	47461123	47701523	PHKB	+	4576.03	-0.359278	0.108076	-3.3243	0.000886393	0.0115231
chr19	16496394	16521352	C19orf44	+	549.157	-0.358618	0.130756	-2.74266	0.00609433	0.0484845
chr1	31296982	31364953	ZCCHC17	+	2018.59	-0.357985	0.113624	-3.15061	0.0016293	0.0184044
chr12	56101331	56109289	ENSG00000257411	+	3003.62	-0.357439	0.130025	-2.749	0.00597767	0.0476919
chr10	87094161	87191465	SHLD2	+	2698.43	-0.357383	0.125612	-2.84514	0.00443913	0.0389111
chr1	241628851	241640369	CHML	-	5594.56	-0.356175	0.118509	-3.00546	0.00265183	0.0263989
chr16	19410496	19499113	TMC5	+	2113.03	-0.356002	0.112422	-3.16666	0.001542	0.0176456
chr2	86020216	86106155	POLR1A	-	4913.1	-0.355544	0.109156	-3.25721	0.00112513	0.0138526
chr6	106570771	106629498	RTN4IP1	-	1042.79	-0.355509	0.128344	-2.76997	0.00560619	0.0456552
chr22	43955442	44010531	SAMM50	+	3400.39	-0.355236	0.128733	-2.75947	0.00578946	0.046651
chr9	105558122	105653820	FKTN	+	1857.12	-0.355042	0.111059	-3.19688	0.00138922	0.0162983
chr19	36214602	36238771	ZNF146	+	4160.37	-0.354754	0.115144	-3.08096	0.00206338	0.0218054
chr15	55318960	55355648	PIGB	+	1471.23	-0.354222	0.113448	-3.12232	0.00179429	0.0198145
chr7	56051685	56063989	CCT6A	+	20200.1	-0.35322	0.12603	-2.80267	0.00506807	0.0425903
chr9	37512547	37592469	ENSG00000256966	-	3145.98	-0.353058	0.124667	-2.83201	0.00462564	0.0400692
chr16	68310951	68360852	PRMT7	+	4917.67	-0.352399	0.127011	-2.77456	0.00552756	0.0452651
chr14	60144119	60169856	DHRS7	-	913.636	-0.351518	0.127072	-2.76629	0.00566983	0.0459643
chr2	10562347	10689987	NOL10	-	2432.37	-0.351463	0.116428	-3.0187	0.00253859	0.0255303
chr6	87470623	87512336	SLC35A1	+	784.004	-0.351406	0.121533	-2.89145	0.00383467	0.0349162
chr5	31400494	31532196	DROSHA	-	6888.83	-0.350896	0.121536	-2.88718	0.00388713	0.0352614
chr1	108560089	108644900	FAM102B	+	3956.14	-0.350487	0.113289	-3.09373	0.00197657	0.021205
chr9	96490241	96619843	CDC14B	-	983.523	-0.350299	0.126578	-2.76744	0.00564976	0.0458832
chr9	137554444	137578925	DPH7	-	996.017	-0.349185	0.119344	-2.92587	0.00343498	0.0321496
chr10	125719515	125764143	EDRF1	+	2677.97	-0.349169	0.110522	-3.15928	0.00158162	0.0179942
chr6	151398898	151452158	RMND1	-	1693.48	-0.347958	0.126964	-2.74059	0.00613289	0.0487324
chr1	114567557	114581629	BCAS2	-	3328.97	-0.347072	0.125728	-2.76051	0.00577117	0.046591
chr22	40769630	40819399	SLC25A17	-	2477.65	-0.34702	0.120391	-2.88243	0.00394623	0.0355603
chr10	5684731	5763779	TASOR2	+	8138.24	-0.346713	0.105825	-3.27627	0.00105186	0.0132175
chr11	77322017	77474635	PAK1	-	1483.88	-0.345416	0.113734	-3.03705	0.00238907	0.0243031
chr4	99896248	99946618	DNAJB14	-	2301.41	-0.344733	0.12459	-2.76693	0.00565871	0.0459137
chr6	34284887	34426071	RPS10-NUDT3	-	3910.33	-0.343943	0.115772	-2.97085	0.00296974	0.0287634
chr7	103074881	103099759	ARMC10	+	1090.84	-0.343325	0.122937	-2.79269	0.00522723	0.0434701
chr4	163494442	163520539	TMA16	+	1202.96	-0.343242	0.12418	-2.76406	0.00570868	0.046192
chr15	50275389	50355408	GABPB1	-	2548.33	-0.342541	0.109704	-3.12241	0.00179374	0.0198145
chr11	86302211	86345943	HIKESHI	+	1217.85	-0.341875	0.118384	-2.88784	0.00387893	0.035205
chr17	42113111	42121367	KAT2A	-	2422.33	-0.341749	0.123417	-2.76905	0.00562199	0.0457417
chr14	30622291	30737694	SCFD1	+	2776.25	-0.341686	0.111703	-3.05887	0.00222176	0.0230116
chr20	35302566	35412031	UQCC1	-	2591.6	-0.340776	0.107654	-3.16548	0.00154828	0.0176947
chr6	96521595	96555276	UFL1	+	1419.06	-0.340532	0.111989	-3.04077	0.0023597	0.0240735
chr1	28587829	28648291	TAF12	-	855.835	-0.340483	0.118928	-2.86294	0.00419729	0.0372531
chr12	62260338	62417431	USP15	+	5239.1	-0.338987	0.112683	-3.00833	0.00262686	0.0262314
chrX	16786432	16844519	TXLNG	+	3682.91	-0.337982	0.112879	-2.99421	0.00275158	0.0271928
chr8	89924515	90003228	NBN	-	4563.91	-0.336101	0.116796	-2.87767	0.00400624	0.0358816
chr1	248850006	248859144	ZNF692	-	1422.72	-0.335606	0.122007	-2.7507	0.00594674	0.0475813
chr1	229626247	229660200	URB2	+	3579.15	-0.335383	0.111858	-2.99829	0.00271502	0.0269067
chr9	116153791	116402321	PAPPA	+	2244.75	-0.335121	0.119377	-2.80725	0.00499662	0.0421269
chr7	12211270	12243367	TMEM106B	+	1962.74	-0.334508	0.118176	-2.83061	0.004646	0.0402062
chr13	39655627	39791665	COG6	+	1190.88	-0.334349	0.119396	-2.80035	0.00510475	0.0427735
chr2	200305881	200482264	SPATS2L	+	2439.48	-0.333562	0.115629	-2.88475	0.0039173	0.03541
chr5	43444252	43483893	TMEM267	-	2059.69	-0.33346	0.119512	-2.79019	0.00526779	0.0437251
chr2	38797729	38875934	DHX57	-	1706.42	-0.332471	0.117354	-2.83306	0.00461048	0.0400163
chr11	93729948	93784391	TAF1D	-	14346.2	-0.332266	0.116217	-2.859	0.00424973	0.0376147
chr22	42555212	42582039	RRP7BP	-	1687.82	-0.330913	0.118504	-2.79242	0.00523151	0.0434853
chr19	9560329	9584504	ZNF121	-	5520.46	-0.330882	0.117294	-2.82096	0.00478795	0.0410329
chrX	151953124	151974680	GABRE	-	1511.07	-0.330277	0.117134	-2.81966	0.00480753	0.0411409
chr1	27970344	28088637	EYA3	-	1676.3	-0.329815	0.119626	-2.75706	0.00583228	0.046813
chr5	113513694	113595285	YTHDC2	+	5019.93	-0.328595	0.110008	-2.98701	0.00281718	0.0277326
chr20	33358839	33401561	CDK5RAP1	-	2347.58	-0.327944	0.115777	-2.83256	0.00461775	0.0400342
chr8	30578318	30658236	GTF2E2	-	1533.15	-0.327563	0.114119	-2.87037	0.0040999	0.0365538
chr2	75652000	75710985	GCFC2	-	1841.41	-0.327468	0.117022	-2.79835	0.00513648	0.0429222
chr16	8788823	8862534	PMM2	+	3210.38	-0.327188	0.113922	-2.87202	0.00407851	0.0364367
chr13	52652709	52700909	SUGT1	+	2764.78	-0.326446	0.110212	-2.96198	0.00305672	0.0293711
chr21	39380332	39515506	GET1-SH3BGR	+	1164.8	-0.326443	0.114007	-2.86337	0.00419163	0.0372531
chrX	139726346	139945276	ATP11C	-	7461.52	-0.325242	0.102001	-3.18861	0.00142957	0.0167051
chr11	109864295	110296712	RDX	-	6247.7	-0.324383	0.108329	-2.99442	0.00274968	0.0271893
chr3	113716458	113746300	NAA50	-	10142	-0.3231	0.111263	-2.90394	0.00368502	0.03388
chr10	99702558	99756134	CUTC	+	2168.59	-0.322111	0.110086	-2.92601	0.00343343	0.0321496
chr4	25377263	25418498	ANAPC4	+	1708.36	-0.321785	0.111784	-2.87864	0.00399395	0.0358078
chr2	161308425	161411717	PSMD14	+	6257.47	-0.320378	0.108447	-2.95423	0.0031345	0.0299395
chr2	46915869	47076137	TTC7A	+	4487.54	-0.320239	0.10991	-2.91364	0.00357241	0.0330682
chr12	51047962	51060424	LETMD1	+	2757.64	-0.320086	0.107305	-2.98296	0.00285477	0.027978
chr5	140245035	140303113	PFDN1	-	1519.09	-0.31892	0.113448	-2.81116	0.00493632	0.0418433
chr16	69131291	69231130	UTP4	+	2567.03	-0.31859	0.111572	-2.85546	0.00429745	0.0379515
chr15	64165525	64356173	CSNK1G1	-	2244.49	-0.317548	0.116199	-2.73278	0.00628014	0.0496792
chr2	200908977	200963680	ORC2	-	2725.21	-0.316529	0.111782	-2.83166	0.00463077	0.040094
chr11	95165513	95232541	SESN3	-	4355.13	-0.31454	0.107985	-2.91281	0.00358194	0.0331391
chr4	44678420	44700928	GUF1	+	1771.28	-0.314437	0.114313	-2.75065	0.00594767	0.0475813
chr2	196763035	196799725	GTF3C3	-	2411.22	-0.313186	0.108998	-2.87331	0.00406199	0.0363257
chr5	55307989	55425579	MTREX	+	8267.32	-0.312006	0.108285	-2.88135	0.0039598	0.03561
chr12	103965822	103988874	TDG	+	1647.17	-0.310366	0.108444	-2.86199	0.00420996	0.0373281
chr5	74721206	74767147	GFM2	-	4151.72	-0.308316	0.111753	-2.75889	0.00579976	0.0466514
chr15	75903876	75942511	FBXO22	+	2954.3	-0.303352	0.110995	-2.73301	0.00627582	0.0496672
chr9	35161992	35405338	UNC13B	+	3916.25	-0.303282	0.105949	-2.86254	0.00420266	0.037282
chr18	9102630	9134345	NDUFV2	+	3395.71	-0.302676	0.108709	-2.78427	0.00536482	0.0443074
chr1	108881885	108963527	CLCC1	-	5624.1	-0.297731	0.102159	-2.91439	0.0035638	0.0330231
chr1	75724431	75787575	ACADM	+	12149.2	-0.294929	0.103704	-2.84397	0.00445557	0.038978
chr1	77088989	77219430	PIGK	-	6657.3	-0.293761	0.102012	-2.87968	0.00398083	0.0357083
chr5	32226994	32312987	MTMR12	-	4139.1	-0.293271	0.107342	-2.73212	0.00629289	0.0497133
chr1	108815898	108963484	AKNAD1	-	5674.27	-0.286992	0.101833	-2.81826	0.0048285	0.0412604
chr10	92451684	92574096	IDE	-	9076.3	-0.280902	0.101065	-2.77941	0.00544569	0.0447605
chr10	12068954	12123221	DHTKD1	+	7113.74	0.299961	0.101689	2.94979	0.00317993	0.0302221
chr2	25042076	25159135	EFR3B	+	2637.14	0.302163	0.109142	2.76854	0.00563078	0.0457922
chr3	50329782	50340980	RASSF1	-	2509.14	0.308182	0.109188	2.82248	0.00476531	0.0408984
chr18	21529284	21600884	ESCO1	-	2422.62	0.308726	0.110797	2.78641	0.00532956	0.0441563
chr8	94879770	94896678	CCNE2	-	2720.54	0.31447	0.11186	2.81127	0.00493462	0.0418433
chr22	30925130	30968774	MORC2	-	2567.25	0.314525	0.114194	2.75431	0.00588152	0.0471588
chr7	32868172	32894131	KBTBD2	-	2651.42	0.315421	0.113137	2.78795	0.0053042	0.0440067
chr11	61792980	61867354	FADS2	+	13871.2	0.316822	0.106647	2.97075	0.0029707	0.0287634
chr22	37010859	37020183	TST	-	1265.27	0.319404	0.113141	2.82307	0.00475657	0.0408432
chr14	24429286	24441843	KHNYN	+	2841.52	0.319748	0.109984	2.90722	0.00364654	0.0336136
chr19	33795933	33815763	KCTD15	+	2645.12	0.320944	0.106079	3.02553	0.00248196	0.0250515
chr9	136800366	136829466	ENSG00000272679	+	1993.2	0.321088	0.111306	2.88473	0.00391754	0.03541
chr5	128083766	128189677	SLC12A2	+	1974.78	0.322485	0.114617	2.81357	0.00489942	0.0416651
chr6	2765393	2786952	WRNIP1	+	7283.32	0.323065	0.102634	3.14775	0.00164534	0.0185402
chr16	636817	648474	MCRIP2	+	3536.83	0.323717	0.114205	2.83454	0.00458921	0.0398513
chr19	1573596	1592865	MBD3	-	7331.13	0.32482	0.10864	2.98987	0.00279094	0.0275339
chr19	45527767	45602212	OPA3	-	1769.55	0.326523	0.11674	2.79701	0.00515775	0.0430137
chr14	64503712	64533690	ZBTB1	+	2454.75	0.33028	0.112133	2.94542	0.00322517	0.0305742
chr18	670318	712662	ENOSF1	-	6372.9	0.33158	0.109629	3.02458	0.0024898	0.025111
chr20	62231922	62296213	OSBPL2	+	2454.98	0.332081	0.119815	2.77161	0.00557794	0.0455623
chr11	9664077	9752993	SWAP70	+	4673.37	0.332158	0.113906	2.91607	0.00354472	0.0329325
chr5	168548495	168579368	PANK3	-	8077.63	0.332834	0.104165	3.19526	0.00139703	0.016379
chr1	43991500	44031467	SLC6A9	-	3111.63	0.333167	0.113758	2.92873	0.00340354	0.0319229
chr16	1776712	1793700	SPSB3	-	1196.13	0.333856	0.116747	2.85965	0.00424111	0.0375666
chr13	110712736	110723339	ING1	+	733.116	0.334123	0.121075	2.75963	0.00578667	0.046651
chr19	17511636	17521288	PGLS	+	1806.12	0.33533	0.116443	2.87978	0.00397947	0.0357083
chr5	168552277	168553727	SLC2A3P1	-	1010.48	0.337953	0.118296	2.85684	0.00427882	0.0378058
chr22	38733290	38794143	SUN2	-	2600.01	0.340622	0.124111	2.7445	0.00606031	0.0482641
chr19	58573503	58605223	CENPBD2P	+	1018.65	0.342285	0.121757	2.81122	0.00493545	0.0418433
chr6	143536845	143831185	PHACTR2	+	4238.39	0.343208	0.121066	2.83488	0.00458428	0.039828
chr17	76726830	76733936	METTL23	+	2193.63	0.343858	0.116767	2.94482	0.00323145	0.0305846
chr16	2211593	2214840	PGP	-	2694.64	0.344454	0.125088	2.75369	0.00589282	0.0472281
chr5	154445997	154461053	SAP30L	+	1102.69	0.344744	0.119552	2.88363	0.00393123	0.0354975
chr14	73715122	73790285	MIDEAS	-	2056.83	0.345247	0.121322	2.8457	0.00443136	0.0388827
chrX	101408222	101414133	HNRNPH2	+	4003.39	0.346466	0.121934	2.84142	0.00449133	0.0391938
chr17	18840085	18931287	PRPSAP2	+	2508.48	0.348253	0.119376	2.91728	0.00353094	0.0328285
chr12	57055643	57088063	NEMP1	-	3501.78	0.349095	0.107101	3.25951	0.00111605	0.0137696
chr19	17309518	17323298	DDA1	+	1457.48	0.349276	0.126054	2.77085	0.00559097	0.0456326
chr21	33205282	33265675	IFNAR2	+	1088.73	0.350099	0.120394	2.90794	0.00363818	0.0335645
chr22	41833079	41907307	SREBF2	+	6747.02	0.350285	0.111817	3.13266	0.00173232	0.019299
chr5	1456480	1523962	LPCAT1	-	11202.6	0.351457	0.103045	3.41071	0.000647944	0.00899817
chr14	69854131	70032366	SMOC1	+	9036.21	0.351713	0.125228	2.80858	0.00497602	0.0420515
chr16	57758217	57863053	KIFC3	-	10439.4	0.351714	0.113821	3.09006	0.00200118	0.0213911
chr1	9148011	9198906	MIR34AHG	-	613.415	0.351826	0.12873	2.73306	0.00627486	0.0496672
chr22	45133020	45163811	NUP50-DT	-	1172.59	0.353041	0.121973	2.89443	0.00379853	0.0346533
chr6	26158122	26171349	H2BC5	+	8807.97	0.353513	0.122263	2.8914	0.00383526	0.0349162
chr1	214281102	214337131	SMYD2	+	3544.4	0.354132	0.119599	2.96098	0.00306658	0.0294243
chr17	42980565	42995142	RUNDC1	+	1674.21	0.354513	0.116627	3.03972	0.00236795	0.0241299
chr17	42199176	42288633	STAT5B	-	2118.83	0.354526	0.117753	3.01076	0.00260591	0.0260591
chr16	31074422	31084196	ZNF646	+	1863.27	0.356659	0.116575	3.05949	0.00221718	0.0229776
chrX	17737449	17754988	SCML1	+	3400.44	0.356928	0.113705	3.13907	0.00169483	0.018953
chr3	141324213	141449792	ZBTB38	+	4201.82	0.358501	0.113017	3.17209	0.00151345	0.0174091
chr4	185204237	185370185	SNX25	+	4940.03	0.360237	0.112116	3.21308	0.00131319	0.0155092
chr12	121429096	121581023	KDM2B	-	1938.78	0.360501	0.110768	3.25456	0.0011357	0.0139059
chr3	15601341	15722311	BTD	+	1345.66	0.361212	0.120387	3.00041	0.00269615	0.0267798
chr12	12685498	12722369	CDKN1B	+	3501.08	0.361778	0.120904	2.99228	0.002769	0.0273344
chr8	52622458	52745843	RB1CC1	-	7466.03	0.362263	0.124061	2.92003	0.00350001	0.0325857
chr6	110874770	110898879	AMD1	+	10443.7	0.362444	0.119071	3.04392	0.00233515	0.0238645
chr8	22578279	22598025	PDLIM2	+	1434.7	0.363037	0.118527	3.06291	0.00219198	0.0227966
chr7	1542235	1560821	TMEM184A	-	1312.25	0.363428	0.128457	2.82919	0.00466659	0.0403319
chr16	69118010	69132588	CHTF8	-	3633.26	0.363634	0.11771	3.08923	0.00200678	0.0213992
chr16	69118010	69132588	DERPC	-	3633.26	0.363634	0.11771	3.08923	0.00200678	0.0213992
chr17	76732978	76738522	ENSG00000267168	+	1584.31	0.363673	0.121704	2.98818	0.00280648	0.0276427
chr17	76389456	76453152	UBE2O	-	3915.73	0.364131	0.112949	3.22386	0.00126477	0.0150783
chr11	102396332	102470384	TMEM123	-	6933.37	0.364495	0.115493	3.15599	0.00159955	0.0181516
chr7	77793728	77798434	TMEM60	-	825.038	0.364526	0.132548	2.75015	0.00595677	0.0476326
chr5	196868	218153	CCDC127	-	2301.17	0.365461	0.115205	3.17228	0.00151248	0.0174091
chr19	15114984	15125786	ILVBL	-	1925.36	0.366099	0.12761	2.86889	0.00411912	0.0367067
chr15	58771192	58861900	MINDY2	+	1202.24	0.366463	0.124508	2.94329	0.00324748	0.0306706
chr4	88457119	88506163	HERC5	+	2576.37	0.368221	0.126972	2.90002	0.00373139	0.0342173
chr17	9644698	9729687	USP43	+	3184.84	0.368418	0.117142	3.14506	0.00166055	0.0186759
chr15	99565417	99716488	MEF2A	+	3267.32	0.368608	0.133467	2.76179	0.00574846	0.0464713
chr11	57387365	57424059	ENSG00000254979	-	17529.5	0.369038	0.115306	3.20051	0.00137184	0.0161479
chr1	54849627	54887195	DHCR24	-	21141.8	0.369918	0.128436	2.88018	0.0039745	0.0356878
chr5	180467269	180483286	ENSG00000289839	+	467.783	0.370081	0.133348	2.7753	0.0055151	0.0452259
chr21	33324387	33359864	IFNAR1	+	2035.03	0.370415	0.11995	3.08807	0.00201462	0.0214311
chr1	16246840	16352480	FBXO42	-	1778.31	0.370572	0.134284	2.75961	0.00578696	0.046651
chr5	218303	257082	SDHA	+	25030.6	0.370736	0.109131	3.39715	0.000680919	0.00933953
chr5	218298	314955	ENSG00000286001	+	48727.2	0.37147	0.10847	3.42462	0.000615653	0.00864555
chr9	100442271	100577636	MSANTD3-TMEFF1	+	1741.01	0.371748	0.126857	2.93045	0.00338468	0.0318135
chr11	57406954	57427580	SLC43A3	-	20925.8	0.372208	0.114772	3.24301	0.00118274	0.0143225
chr5	271621	314974	PDCD6	+	23503.3	0.373221	0.109725	3.40143	0.000670336	0.00924457
chr17	40287879	40304657	CDC6	+	7937.75	0.373778	0.122028	3.06304	0.00219099	0.0227966
chr19	49446298	49453497	PIH1D1	-	3445.23	0.374136	0.133839	2.79541	0.00518338	0.0431663
chr11	67119263	67258082	KDM2A	+	3420.82	0.374371	0.120666	3.10255	0.00191862	0.0206837
chr19	7348937	7472485	ARHGEF18	+	4853.68	0.37445	0.120033	3.11955	0.00181125	0.0199645
chr11	73264498	73305103	P2RY6	+	8099.05	0.374594	0.133114	2.81408	0.0048917	0.0416261
chr14	75013769	75051532	MLH3	-	1653.12	0.374833	0.12673	2.95773	0.00309917	0.0296662
chr10	97332497	97334729	FRAT2	-	1342.54	0.374859	0.123684	3.03078	0.00243923	0.024728
chr22	19175581	19178739	SLC25A1	-	5062.61	0.375566	0.135492	2.77187	0.00557345	0.0455564
chr6	43171269	43181506	SRF	+	1312.37	0.37614	0.123295	3.05073	0.00228286	0.0234516
chr1	35808016	35857890	AGO4	+	728.45	0.376142	0.134184	2.80319	0.00506005	0.0425602
chr1	85265776	85276632	BCL10	-	1952.74	0.376422	0.133766	2.81403	0.00489248	0.0416261
chr14	64449106	64505213	ZBTB25	-	902.505	0.377968	0.127367	2.96756	0.00300178	0.0289534
chr1	11806096	11848079	CLCN6	+	877.243	0.378137	0.124729	3.03166	0.00243211	0.0246699
chr16	10743786	10769351	NUBP1	+	2435.44	0.378279	0.127943	2.95661	0.0031104	0.0297253
chr17	44141906	44162476	HROB	+	887.332	0.379594	0.12218	3.10684	0.00189097	0.0205644
chr7	36324152	36390125	KIAA0895	-	2246.56	0.380227	0.124215	3.06103	0.00220578	0.0228997
chr6	157981863	158099176	SYNJ2	+	1693.45	0.380593	0.120111	3.16866	0.00153141	0.0175473
chr11	5225464	5229395	HBB	-	569.589	0.38073	0.138474	2.74946	0.0059693	0.0476896
chr5	181254077	181261150	TRIM52	-	853.235	0.38078	0.122405	3.11083	0.00186561	0.0203479
chr11	33039417	33105943	TCP11L1	+	1241.02	0.381158	0.121896	3.12691	0.00176653	0.0195936
chr1	109309568	109397918	SORT1	-	4846.81	0.381468	0.125825	3.03172	0.00243164	0.0246699
chr8	22987417	23020509	RHOBTB2	+	2011.32	0.381473	0.121509	3.13947	0.00169252	0.018939
chr10	30434021	30461833	MAP3K8	+	3080.84	0.38196	0.104194	3.66587	0.000246497	0.00414027
chr11	1274371	1309654	TOLLIP	-	918.474	0.382565	0.129681	2.95004	0.0031773	0.0302185
chr3	50292831	50299405	HYAL3	-	1055.58	0.383486	0.137103	2.79707	0.00515685	0.0430137
chr17	21428263	21574517	LINC02693	-	2598.86	0.383612	0.112817	3.40031	0.000673094	0.00926531
chr19	58467056	58475436	ZNF324	+	682.705	0.384049	0.139118	2.76059	0.00576962	0.046591
chr1	19312326	19329300	SLC66A1	+	616.173	0.384608	0.133272	2.88588	0.0039032	0.0353528
chr6	73489308	73525587	EEF1A1	-	22860.7	0.384646	0.135396	2.84089	0.00449873	0.0392004
chr9	127785679	127790792	CDK9	+	1245.18	0.384754	0.140655	2.73545	0.00622951	0.0494113
chr11	120111286	120185529	TRIM29	-	4472.94	0.385262	0.138907	2.77353	0.0055452	0.0453675
chr18	13726660	13764556	RNMT	+	2485.93	0.386025	0.12982	2.97354	0.00294382	0.0285973
chr4	151409176	151670503	FHIP1A	+	3873.73	0.386739	0.140129	2.75988	0.00578229	0.046651
chr22	42615730	42720870	CYB5R3	-	4330.87	0.386877	0.132204	2.92636	0.00342949	0.0321492
chr1	224175756	224193441	DEGS1	+	15084.3	0.38716	0.118029	3.2802	0.00103732	0.0130532
chr16	15949138	16143257	ABCC1	+	2425.32	0.387693	0.128763	3.01089	0.00260482	0.0260591
chr8	144148016	144261927	MROH1	+	2876.66	0.388042	0.11152	3.47957	0.000502215	0.00732604
chr2	46541806	46584688	RHOQ	+	822.632	0.388519	0.136839	2.83923	0.00452223	0.039347
chr10	58191517	58267894	IPMK	-	2014.93	0.388556	0.129668	2.99655	0.00273055	0.0270191
chr18	54269517	54321266	POLI	+	706.373	0.389633	0.13789	2.82568	0.00471811	0.0405918
chr1	229321011	229343294	CCSAP	-	2610.19	0.389753	0.140175	2.78048	0.00542779	0.0447173
chr3	113442718	113515187	SPICE1	-	1825.63	0.38996	0.14169	2.75221	0.00591948	0.0473987
chr1	205789094	205813748	SLC41A1	-	1933.84	0.390426	0.122032	3.19936	0.00137731	0.0161908
chr11	66466327	66477337	PELI3	+	580.673	0.39057	0.131069	2.97988	0.00288366	0.0282142
chr19	18531751	18544077	FKBP8	-	7022.15	0.391368	0.135807	2.88179	0.00395427	0.0355784
chr12	57089043	57095476	NAB2	+	984.611	0.39155	0.141948	2.75841	0.00580834	0.0466779
chr1	185157080	185291781	SWT1	+	565.857	0.392034	0.133854	2.92882	0.00340255	0.0319229
chr19	782755	786092	LINC01836	+	473.83	0.393817	0.135629	2.90363	0.00368861	0.0338954
chr15	74954418	74956772	RPP25	-	2213.65	0.393929	0.118093	3.33576	0.000850654	0.0111239
chr1	44739818	44767767	KIF2C	+	11176.2	0.394123	0.112995	3.48797	0.000486703	0.00718273
chr1	27234632	27308636	WDTC1	+	716.973	0.394429	0.128849	3.06117	0.00220476	0.0228997
chr18	22169589	22202528	GATA6	+	560.794	0.395066	0.138808	2.84614	0.00442528	0.0388827
chr8	144876497	144902168	ZNF250	-	619.783	0.39533	0.138906	2.84603	0.00442679	0.0388827
chr16	2969270	2973484	PAQR4	+	1334.53	0.395569	0.118507	3.33793	0.000844051	0.0110621
chr3	72371825	72446621	RYBP	-	2238.42	0.396347	0.136131	2.9115	0.00359693	0.033243
chr17	5105269	5123162	ZNF232	-	834.892	0.398469	0.12217	3.26158	0.00110793	0.0136873
chrX	23664262	23686397	PRDX4	+	11565.3	0.398706	0.141423	2.81924	0.00481369	0.0411737
chr17	80260852	80398794	RNF213	+	16436.4	0.399179	0.113887	3.50503	0.00045655	0.00689309
chr12	110124335	110218793	IFT81	+	1154.46	0.400009	0.13556	2.95078	0.00316969	0.0301778
chr3	112086335	112131004	C3orf52	+	1411.58	0.400446	0.123139	3.25199	0.00114601	0.013989
chr7	99472890	99503650	ZNF789	+	1171.65	0.400527	0.113619	3.52519	0.000423186	0.00643884
chr12	121777754	121803403	RHOF	-	4151.42	0.400813	0.121792	3.29096	0.000998458	0.0126502
chr22	38219291	38273010	TMEM184B	-	3127.61	0.40095	0.120833	3.31822	0.000905925	0.011709
chr17	42313324	42388540	STAT3	-	9139.21	0.401401	0.128799	3.11651	0.00183008	0.0201262
chr1	27404230	27490167	WASF2	-	2682.12	0.40165	0.119286	3.36713	0.000759549	0.0101734
chr11	60924460	60937159	TMEM132A	+	1400.31	0.401718	0.115521	3.47745	0.000506204	0.00737206
chr9	5231419	5235304	INSL4	+	1794.52	0.401875	0.116664	3.44474	0.000571611	0.00812386
chr11	369499	382117	B4GALNT4	+	696.417	0.40188	0.140635	2.85761	0.00426838	0.0377325
chr12	12611827	12645108	CREBL2	+	3645.46	0.403192	0.130414	3.09164	0.00199054	0.0213031
chr16	22206278	22288738	EEF2K	+	3594.04	0.403323	0.129467	3.11525	0.00183789	0.0201354
chr5	179862066	179907897	TBC1D9B	-	6449.05	0.403824	0.123615	3.2668	0.0010877	0.01351
chr4	55395957	55453397	TMEM165	+	4415.61	0.404028	0.130974	3.08479	0.00203697	0.0216095
chr5	470456	524449	SLC9A3	-	2026.36	0.404351	0.115599	3.49787	0.000468991	0.00701604
chr8	126556323	127419050	PCAT1	+	7290.07	0.40463	0.135576	2.98453	0.00284017	0.0278852
chr1	109100193	109100619	ENSG00000270066	+	9435.35	0.405042	0.130576	3.10196	0.00192243	0.0207121
chr1	109100193	109100612	SCARNA2	+	9431	0.405054	0.130634	3.10067	0.00193081	0.0207897
chr1	154944076	154956123	PBXIP1	-	1518.35	0.405289	0.134596	3.01116	0.00260248	0.0260543
chr17	38705273	38729795	MLLT6	+	4529.53	0.40593	0.106546	3.80989	0.000139029	0.00257386
chrX	154428633	154436516	ATP6AP1	+	4970.08	0.407497	0.137297	2.96799	0.00299758	0.0289534
chr5	466124	473098	PP7080	-	2067.59	0.407815	0.115637	3.52669	0.000420789	0.00641894
chr1	40861054	40862363	CITED4	-	1572.03	0.408947	0.142917	2.86144	0.00421721	0.0373736
chr8	6708642	6761503	AGPAT5	+	2237.92	0.409095	0.139256	2.93771	0.00330644	0.0311277
chr3	184710364	184712064	MAGEF1	-	961.587	0.409296	0.137428	2.97826	0.00289894	0.0283257
chr18	2885296	3013144	LPIN2	-	3068.85	0.409417	0.117484	3.48487	0.000492379	0.0072363
chr2	176104216	176109754	HOXD11	+	395.435	0.4104	0.146166	2.80777	0.00498861	0.0420835
chr20	25612935	25624014	NANP	-	598.11	0.410582	0.140506	2.92216	0.00347616	0.0324662
chr11	104942866	104969366	CASP4	-	739.918	0.410671	0.126823	3.23814	0.0012031	0.0145318
chr5	38682581	38845829	OSMR-DT	-	2204.61	0.410782	0.147532	2.78436	0.0053633	0.0443074
chr19	1554672	1568325	MEX3D	-	781.724	0.411112	0.134157	3.06442	0.00218095	0.0227179
chr22	17137511	17165287	HDHD5	-	2564.65	0.411716	0.134094	3.07034	0.00213813	0.0224611
chr6	143807092	143844617	ENSG00000257065	+	2386.13	0.411886	0.122084	3.37379	0.000741403	0.00997565
chr17	45132600	45144181	ACBD4	+	337.419	0.413224	0.149776	2.75894	0.00579893	0.0466514
chr15	59132434	59372871	MYO1E	-	25846.7	0.413236	0.125656	3.28862	0.0010068	0.0127327
chr10	28522652	28533066	WAC-AS1	-	841.567	0.414432	0.125054	3.31401	0.000919674	0.0118253
chr22	30488902	30505711	SEC14L4	-	1804.66	0.414566	0.147176	2.81682	0.00485023	0.0413861
chr1	9728926	9823984	CLSTN1	-	6220.32	0.415947	0.12642	3.2902	0.00100117	0.0126704
chr9	133459965	133470848	CACFD1	+	405.428	0.416047	0.150778	2.75934	0.0057918	0.046651
chr3	140941830	140980995	SLC25A36	+	5411.74	0.416646	0.127896	3.25769	0.00112324	0.0138389
chr2	158968640	159232659	TANC1	+	8404.45	0.416824	0.150478	2.77	0.00560567	0.0456552
chr9	128818500	128822676	ENDOG	+	992.285	0.417291	0.136372	3.05996	0.0022137	0.0229684
chr12	62603366	62604408	ENSG00000275180	+	440.788	0.418841	0.146968	2.84988	0.00437352	0.0385848
chr3	113361901	113515151	ENSG00000285943	-	2849.69	0.419112	0.149842	2.79703	0.00515743	0.0430137
chr16	88803789	88809258	CDT1	+	2629.78	0.419685	0.12145	3.45562	0.00054903	0.00785979
chr18	63327726	63367228	KDSR	-	2146.17	0.419925	0.11139	3.76985	0.000163344	0.00296501
chr22	45502238	45601135	FBLN1	+	6213.73	0.420282	0.113722	3.69569	0.000219293	0.00377937
chr10	27154824	27187953	MASTL	+	3729.5	0.420842	0.115758	3.63555	0.000277392	0.00456212
chr22	20917407	20953747	CRKL	+	5141.63	0.421761	0.128838	3.27357	0.00106197	0.0132972
chr3	150741125	150763477	SIAH2	-	1512.57	0.422704	0.130943	3.22816	0.00124591	0.0149037
chr2	73254682	73284478	FBXO41	-	1366.99	0.422767	0.145742	2.90079	0.00372228	0.0341515
chr12	114670255	114684175	TBX3	-	1338.03	0.423166	0.150545	2.8109	0.00494028	0.0418515
chr11	59713456	59805882	STX3	+	1324.72	0.424392	0.113765	3.73041	0.000191167	0.00338321
chr17	45148475	45152099	HEXIM1	+	2388.58	0.424728	0.121997	3.48146	0.000498682	0.0072986
chr19	7112255	7294414	INSR	-	2750.06	0.424979	0.109604	3.87741	0.000105573	0.00206475
chr17	59565558	59608345	DHX40	+	3661.71	0.426522	0.141817	3.00756	0.00263355	0.0262539
chr10	125836337	125896436	DHX32	-	4420.86	0.428492	0.13403	3.19699	0.00138871	0.0162983
chr10	98410939	98446963	HPS1	-	1306.36	0.430412	0.120779	3.56363	0.000365766	0.00569758
chr10	97677424	97687241	AVPI1	-	6288.56	0.430594	0.11972	3.59666	0.000322327	0.00515723
chr12	109553715	109573580	MMAB	-	3336.36	0.431242	0.120649	3.57435	0.000351103	0.00551288
chr1	6613731	6624030	PHF13	+	668.864	0.431502	0.144879	2.97837	0.0028979	0.0283257
chr16	3018445	3022383	TNFRSF12A	+	1462.97	0.431824	0.153776	2.80813	0.00498296	0.042072
chr22	30693782	30907824	OSBP2	+	6097.73	0.43251	0.121692	3.55415	0.000379204	0.00586042
chr3	39141855	39154562	CSRNP1	-	820.607	0.432704	0.155391	2.78461	0.00535922	0.0443074
chr3	184361710	184368596	POLR2H	+	2899.83	0.432925	0.142319	3.04195	0.00235055	0.0240079
chr17	81900958	81911432	PCYT2	-	3710.13	0.434325	0.132106	3.2877	0.0010101	0.0127652
chr12	53479669	53500063	MAP3K12	-	541.722	0.434876	0.137887	3.15385	0.0016113	0.018238
chr4	76435229	76783253	SHROOM3	+	2040.66	0.435037	0.108899	3.99488	6.47283e-05	0.00137172
chr11	71453109	71524107	NADSYN1	+	1937.2	0.435335	0.133768	3.25441	0.00113628	0.0139059
chr13	44399540	44405984	TUSC8	-	474.2	0.436182	0.139521	3.12628	0.00177033	0.0196124
chr16	1510427	1612072	IFT140	-	2282.24	0.436239	0.113491	3.84383	0.000121129	0.0022929
chr10	3775996	3785281	KLF6	-	1168.43	0.436431	0.131121	3.32845	0.000873306	0.0113613
chr1	38838198	38859772	RRAGC	-	1300.55	0.437564	0.141846	3.08478	0.00203704	0.0216095
chr6	108559835	108684774	FOXO3	+	2587.48	0.437627	0.160214	2.73152	0.00630434	0.0497691
chr11	78171249	78188626	KCTD21	-	560.536	0.437683	0.132269	3.30903	0.000936184	0.011994
chr15	63121833	63142061	LACTB	+	943.769	0.438499	0.14127	3.10397	0.00190944	0.0206434
chr21	46229196	46259390	MCM3AP-AS1	+	963.343	0.438994	0.128279	3.42218	0.000621208	0.00870972
chr10	98414002	98446920	ENSG00000289758	-	1287.49	0.439005	0.122177	3.59318	0.000326667	0.00521723
chr10	73785606	73801797	ZSWIM8	+	2457.35	0.439134	0.136722	3.21188	0.00131871	0.0155639
chr11	694438	727727	EPS8L2	+	1947.44	0.43942	0.124597	3.52672	0.000420736	0.00641894
chrX	47232866	47248328	USP11	+	3981.69	0.439437	0.138691	3.16846	0.00153249	0.0175482
chr19	45641494	45642840	EML2-AS1	+	978.732	0.43946	0.135046	3.25415	0.00113733	0.0139059
chr1	1232237	1235041	B3GALT6	+	653.075	0.441007	0.139434	3.16284	0.00156239	0.0178099
chr16	28532708	28539008	NUPR1	-	883.251	0.441692	0.15653	2.82177	0.00477596	0.04095
chr11	64894546	64917211	ATG2A	-	2157.22	0.442146	0.132219	3.34405	0.000825661	0.0108614
chr22	37639693	37666932	ENSG00000285304	+	1530.03	0.442257	0.125219	3.53187	0.000412633	0.00631632
chrX	154401236	154412112	DNASE1L1	-	1329.63	0.442451	0.133806	3.30666	0.000944154	0.0120699
chr16	1795620	1827157	HAGH	-	2715.92	0.442604	0.136804	3.23532	0.00121507	0.0146239
chr6	158972871	159000202	RSPH3	-	407.229	0.442622	0.155361	2.84899	0.0043858	0.0386545
chr1	36088892	36093932	ADPRS	+	1531.15	0.443169	0.142248	3.11547	0.00183649	0.0201354
chr17	18260597	18266552	MIEF2	+	792.876	0.443211	0.129122	3.43251	0.000598026	0.00846628
chr17	28546708	28552631	UNC119	-	994.381	0.443561	0.142402	3.11484	0.00184043	0.0201354
chr1	201518703	201584367	RPS10P7	+	360.01	0.44379	0.146084	3.03792	0.0023822	0.0242611
chr7	143279957	143288048	TMEM139	+	920.014	0.444476	0.134676	3.30033	0.000965695	0.0123205
chr19	13795443	13832254	ZSWIM4	+	581.119	0.444794	0.134391	3.3097	0.000933961	0.0119742
chr11	126304060	126350005	DCPS	+	3577.07	0.445103	0.110014	4.04588	5.21275e-05	0.00115491
chr1	248838210	248849517	ZNF672	+	2233.28	0.445244	0.11739	3.79286	0.00014892	0.00273691
chr18	76978827	77133683	MBP	-	879.152	0.445261	0.148433	2.99975	0.002702	0.0268077
chr3	142815922	142889206	PCOLCE2	-	1180.55	0.44529	0.137704	3.23367	0.00122209	0.0146983
chr19	58559125	58574797	MZF1-AS1	+	771.155	0.446576	0.14386	3.10424	0.00190768	0.0206434
chr11	66563464	66568879	CTSF	-	1397.09	0.4476	0.128183	3.4919	0.000479605	0.00710764
chr22	20241415	20283246	RTN4R	-	362.179	0.447913	0.163817	2.73423	0.00625267	0.0495727
chr11	59107185	59127412	FAM111B	+	2130.47	0.449272	0.114684	3.91747	8.9483e-05	0.00179575
chr14	50632058	50668306	SAV1	-	1419.46	0.449483	0.121969	3.68522	0.000228509	0.00389588
chr2	135905881	135986100	DARS1	-	4433.65	0.449637	0.120031	3.74602	0.000179664	0.00323139
chr19	10718055	10833488	DNM2	+	8954.23	0.449955	0.124697	3.60838	0.000308119	0.00497947
chr19	7515292	7521025	ZNF358	+	641.102	0.451033	0.148568	3.03587	0.0023984	0.0243839
chr5	149271859	149343637	AFAP1L1	+	429.563	0.451111	0.142959	3.15552	0.0016021	0.0181687
chr4	1249300	1288291	CTBP1-DT	+	376.889	0.45136	0.163166	2.76627	0.00567014	0.0459643
chr6	150865679	151101887	MTHFD1L	+	5091.92	0.451854	0.117391	3.84914	0.000118531	0.00225336
chr17	81843159	81860856	P4HB	-	28673.7	0.45206	0.162836	2.77616	0.00550043	0.0451265
chr16	4608883	4615027	UBALD1	-	564.842	0.452191	0.129301	3.49721	0.000470148	0.00701604
chr11	65386621	65413525	FRMD8	+	1486.88	0.452584	0.121353	3.72948	0.000191877	0.003389
chr17	76265348	76271298	UBALD2	+	589.188	0.452762	0.140824	3.21508	0.00130407	0.015422
chr16	11249619	11381662	RMI2	+	842.994	0.453105	0.122339	3.70369	0.00021249	0.00368677
chr20	325552	330224	SOX12	+	392.155	0.453882	0.161446	2.81136	0.00493329	0.0418433
chr6	44258166	44265788	NFKBIE	-	405.288	0.454491	0.156641	2.90149	0.00371391	0.0340924
chr16	370788	387113	PGAP6	-	1060.48	0.454674	0.143708	3.16387	0.00155688	0.0177699
chr3	107522936	107811339	BBX	+	10008.8	0.454805	0.138203	3.29085	0.000998847	0.0126502
chr1	153728050	153774808	INTS3	+	9810.45	0.455202	0.124184	3.66553	0.000246824	0.00414027
chr22	43923792	43964488	PNPLA3	+	2224.43	0.45609	0.106638	4.27699	1.89441e-05	0.000499523
chr1	153959099	153968184	SLC39A1	-	6704.52	0.456172	0.136943	3.33112	0.000864983	0.0112799
chr12	57755103	57760411	MARCHF9	+	305.013	0.456529	0.157644	2.89595	0.0037801	0.0345029
chr20	50118254	50153734	PEDS1	-	2365.62	0.45669	0.128736	3.54748	0.000388932	0.00600551
chr16	66878589	66895754	PDP2	+	1035.57	0.457065	0.141743	3.2246	0.00126151	0.0150571
chrX	13689128	13710504	RAB9A	+	3604.67	0.45722	0.121984	3.74819	0.000178118	0.00321339
chr15	89575469	89631056	TICRR	+	4192.61	0.457569	0.120656	3.79234	0.000149237	0.00273989
chrX	71095851	71103532	FOXO4	+	239.01	0.458374	0.165502	2.7696	0.00561249	0.0456855
chr10	17228241	17237593	VIM	+	44644.1	0.458482	0.151516	3.02596	0.00247843	0.0250392
chr14	35401079	35404749	NFKBIA	-	2306.45	0.458622	0.132745	3.45492	0.000550446	0.0078737
chr17	7225342	7234517	DVL2	-	3575.8	0.459748	0.127261	3.61265	0.00030308	0.0049115
chr19	3976056	3985463	EEF2	-	133083	0.459873	0.135249	3.40018	0.000673412	0.00926531
chr14	75578620	75663214	FLVCR2	+	759.562	0.461023	0.13938	3.30767	0.000940746	0.0120437
chr12	6942978	6946003	C12orf57	+	1084.09	0.462056	0.165236	2.79633	0.0051686	0.0430636
chr2	219209772	219218994	ABCB6	-	3000.46	0.463206	0.149742	3.09335	0.00197909	0.0212129
chr9	81583683	81689547	TLE1	-	293.555	0.464321	0.157511	2.94785	0.00319988	0.0303671
chr5	111662621	111997464	NREP	-	551.358	0.465488	0.157967	2.94675	0.0032113	0.0304592
chrX	10156975	10237660	CLCN4	+	436.179	0.465503	0.155901	2.98588	0.0028276	0.0278197
chr3	127672935	127680926	ABTB1	+	231.156	0.465981	0.166531	2.79816	0.00513949	0.0429222
chr20	53567071	53609907	ZNF217	-	2343.53	0.466486	0.136329	3.42177	0.000622148	0.00871011
chr16	57092583	57148369	CPNE2	+	669.002	0.466964	0.135056	3.45757	0.000545078	0.00783284
chr1	155127876	155134899	EFNA1	+	3977.46	0.467616	0.141911	3.29514	0.000983715	0.0125213
chr20	33407957	33443763	SNTA1	-	1087.09	0.468668	0.1475	3.17741	0.00148599	0.0172164
chr21	41167801	41282530	BACE2	+	31305.4	0.469638	0.109124	4.3037	1.67965e-05	0.000449944
chr15	74598500	74645414	CLK3	+	2906.73	0.469935	0.144361	3.25527	0.00113283	0.0138989
chr17	18315293	18328056	SMCR8	+	3497.73	0.470319	0.113325	4.15018	3.3221e-05	0.000796943
chr12	102012840	102062149	WASHC3	-	916.278	0.47063	0.138773	3.39135	0.000695485	0.00950245
chr10	97713173	97718150	MARVELD1	+	1453.69	0.470828	0.122935	3.8299	0.000128194	0.00240857
chr1	113761832	113812476	RSBN1	-	2318.77	0.471463	0.131876	3.57506	0.000350152	0.00550773
chr17	28897781	28903079	DHRS13	-	1109.87	0.471546	0.134156	3.51491	0.000439898	0.00666444
chrX	37836757	37847571	DYNLT3	-	1402.39	0.472131	0.141736	3.33107	0.00086513	0.0112799
chr17	8140472	8156506	PER1	-	922.357	0.472663	0.157353	3.00384	0.00266599	0.026501
chr20	45325288	45348424	SDC4	-	3256.37	0.47274	0.127971	3.69413	0.000220641	0.00379838
chr1	9234774	9271337	H6PD	+	703.148	0.47276	0.154434	3.06125	0.00220414	0.0228997
chr6	31158547	31167159	TCF19	+	2385.21	0.473322	0.128499	3.68345	0.000230096	0.00390787
chr1	233614106	233672514	KCNK1	+	3789.21	0.473613	0.107664	4.39897	1.08765e-05	0.000311158
chr16	88813734	88856970	GALNS	-	1809.04	0.47381	0.150639	3.14534	0.00165892	0.0186694
chr20	21125983	21246622	KIZ	+	977.421	0.473851	0.158826	2.98345	0.00285019	0.0279486
chr6	146543833	146554953	RAB32	+	830.416	0.474449	0.150071	3.16149	0.00156964	0.017881
chr3	169764520	169765060	TERC	-	5928.05	0.474775	0.136338	3.48234	0.000497061	0.00728693
chr16	56932142	56944864	HERPUD1	+	4535.03	0.475019	0.146924	3.2331	0.00122455	0.0147179
chr3	169764610	169765047	Telomerase-vert	-	5922.34	0.475118	0.136432	3.48245	0.000496847	0.00728693
chrX	109624244	109733403	ACSL4	-	5853.47	0.475256	0.12867	3.6936	0.000221104	0.00380264
chr12	122774526	122827528	CCDC62	+	258.971	0.476514	0.1635	2.91447	0.00356299	0.0330231
chr16	67170154	67175735	NOL3	+	1205.96	0.477095	0.143907	3.3153	0.000915452	0.0117882
chr16	1826967	1840207	FAHD1	+	1188.95	0.477114	0.130268	3.66255	0.000249717	0.00418087
chr20	362835	397559	TRIB3	+	2103.12	0.477252	0.157745	3.02547	0.00248248	0.0250515
chr14	23272422	23299447	HOMEZ	-	679.392	0.477546	0.138127	3.4573	0.000545612	0.00783284
chr14	104136454	104180894	KIF26A	+	2211.26	0.478008	0.124044	3.85352	0.000116431	0.00222541
chr6	73413515	73452297	CGAS	-	2384.28	0.478257	0.117565	4.06801	4.74158e-05	0.00106898
chr2	175923882	176002839	LNPK	-	4557.4	0.479399	0.143144	3.34907	0.000810846	0.0107063
chr14	70722526	70809534	MAP3K9	-	1231.75	0.479424	0.137172	3.49507	0.000473935	0.00705318
chr17	2303383	2325260	SRR	+	672.032	0.479616	0.135929	3.52842	0.000418045	0.00639363
chr17	80169992	80209331	CARD14	+	2151.91	0.479824	0.131866	3.63871	0.000274007	0.00451908
chr6	33299694	33314284	TAPBP	-	5483.33	0.480016	0.130296	3.68406	0.000229553	0.00390239
chr6	31114750	31140092	PSORS1C1	+	343.485	0.480203	0.165359	2.904	0.00368434	0.03388
chrX	75156388	75304885	UPRT	+	753.807	0.480532	0.142892	3.3629	0.000771277	0.0102841
chr6	32178405	32180793	RNF5	+	1354.96	0.481215	0.146639	3.28162	0.00103212	0.0130063
chr2	176108790	176119937	HOXD10	+	1294.54	0.48139	0.128088	3.75828	0.000171088	0.00309604
chr14	20457681	20461465	PIP4P1	-	1043.31	0.481706	0.126213	3.81662	0.000135293	0.00251522
chr8	22589274	22602084	ENSG00000248235	+	1380.25	0.481798	0.112951	4.26555	1.99407e-05	0.000519989
chr2	73073382	73156721	RAB11FIP5	-	1336.14	0.484125	0.138788	3.48824	0.000486209	0.00718144
chr2	217730	266398	SH3YL1	-	349.705	0.486243	0.165334	2.94098	0.00327177	0.0308671
chr17	80415165	80438086	ENDOV	+	936.428	0.486257	0.120796	4.02545	5.68657e-05	0.00124275
chr19	42325609	42378769	MEGF8	+	1767.09	0.486463	0.130838	3.71805	0.000200763	0.00352482
chr20	45926518	45935055	ENSG00000285796	-	299.464	0.487629	0.168984	2.88564	0.00390615	0.0353578
chr17	80339898	80342058	ENSG00000280248	+	327.995	0.48816	0.149146	3.27303	0.00106401	0.0133133
chr11	65714005	65720818	RNASEH2C	-	2241.98	0.48866	0.143366	3.40849	0.000653246	0.00904416
chr15	63608618	63833948	HERC1	-	9605.26	0.488954	0.130916	3.73488	0.000187802	0.00334325
chr13	73054976	73077541	KLF5	+	1167.37	0.489271	0.170204	2.87462	0.00404512	0.0361932
chr6	108984309	109094846	SESN1	-	1449.05	0.489595	0.135416	3.61549	0.000299777	0.00487138
chr4	83090048	83137075	PLAC8	-	2499.44	0.4902	0.156112	3.14005	0.0016892	0.0189258
chr17	43014607	43025123	VAT1	-	3729.09	0.491243	0.172551	2.84695	0.00441409	0.0388651
chr16	1444934	1475077	CLCN7	-	6101.42	0.491469	0.109614	4.48363	7.33851e-06	0.000222929
chr3	129087569	129122801	RAB43	-	313.137	0.49192	0.158465	3.10427	0.00190748	0.0206434
chr17	62136972	62140639	POLRMTP1	-	698.933	0.491957	0.151785	3.24114	0.00119052	0.0144069
chr7	156994051	157010663	MNX1	-	386.39	0.493859	0.151156	3.26721	0.00108612	0.01351
chr12	109850945	109880541	GLTP	-	872.331	0.494009	0.14727	3.35444	0.000795246	0.0105476
chr22	37658723	37666932	PDXP	+	1459.93	0.494339	0.127201	3.88628	0.000101793	0.00200412
chr18	79964582	79970822	HSBP1L1	+	898.063	0.494707	0.13639	3.62714	0.000286578	0.00468272
chr21	41986831	42010387	ZBTB21	-	1660.48	0.49522	0.119527	4.14317	3.4254e-05	0.000813987
chr1	44030414	44115913	ENSG00000230615	+	3912.85	0.495664	0.154206	3.21429	0.00130767	0.0154543
chr18	23506184	23586506	NPC1	-	3294.72	0.495909	0.12634	3.92519	8.66599e-05	0.00175103
chr16	87773304	87779374	ENSG00000260498	-	655.763	0.497381	0.13789	3.60708	0.000309662	0.00499527
chr12	122834453	122862961	HIP1R	+	2328.86	0.497833	0.119588	4.1629	3.14228e-05	0.000762077
chr8	80485619	80526265	ZBTB10	+	2137.18	0.499004	0.147781	3.37665	0.000733739	0.00989513
chr12	101877580	102012130	DRAM1	+	1423.03	0.499532	0.12344	4.04674	5.19349e-05	0.00115208
chr1	156728442	156736960	METTL25B	+	950.554	0.49974	0.131241	3.80781	0.000140205	0.00259291
chr19	571277	583494	BSG	+	31662	0.499829	0.148606	3.36344	0.000769772	0.0102791
chr16	87836532	87837663	ENSG00000260466	+	496.483	0.50034	0.138184	3.62082	0.000293667	0.00478529
chr2	200870907	200889303	PPIL3	-	1463.6	0.501509	0.141819	3.53627	0.000405822	0.00622285
chrX	154835788	155026940	F8	-	234.828	0.502124	0.167119	3.00459	0.00265937	0.026459
chr16	4510669	4538828	CDIP1	-	1053.27	0.502471	0.118175	4.25193	2.11932e-05	0.000546204
chr11	9138825	9265959	DENND5A	-	7708.3	0.502815	0.119955	4.19171	2.76862e-05	0.000682695
chr19	16549831	16572415	SLC35E1	-	3061.7	0.502899	0.144518	3.47984	0.000501712	0.00732475
chr17	40309180	40357643	RARA	+	1294.76	0.503388	0.162985	3.08857	0.00201125	0.0214081
chr2	97664217	97703066	C2orf92	+	493.816	0.503436	0.150712	3.34039	0.000836604	0.0109808
chr3	186930325	187078553	ST6GAL1	+	2867.31	0.503805	0.130507	3.86037	0.000113218	0.00217736
chr9	87148644	87159556	LINC02872	+	197.164	0.50435	0.17846	2.82612	0.00471157	0.0405849
chr9	111631334	111654351	DNAJC25	+	1146.65	0.504379	0.14842	3.39833	0.000677998	0.00931391
chr14	33924227	34462774	EGLN3	-	6308.9	0.504844	0.133165	3.79111	0.000149973	0.0027477
chr5	18704433	18746173	LINC02100	-	485.631	0.50555	0.160295	3.15388	0.00161118	0.018238
chr19	49487510	49493057	RPL13A	+	34950.7	0.506139	0.131127	3.85992	0.000113425	0.00217736
chr16	10528422	10580632	EMP2	-	10673.8	0.508105	0.112132	4.53131	5.86203e-06	0.000185073
chr18	21650901	21704780	ABHD3	-	4603.16	0.508498	0.108732	4.67662	2.91646e-06	0.000100122
chr19	3572777	3579088	HMG20B	+	8054.66	0.509182	0.113824	4.4734	7.69873e-06	0.00023188
chr7	36389821	36453791	ANLN	+	16415.9	0.509401	0.126639	4.02246	5.75945e-05	0.00125713
chr10	28050993	28334486	MPP7	-	5590	0.509611	0.120062	4.24458	2.19005e-05	0.000561975
chr1	207034366	207081024	PFKFB2	+	6286.87	0.510465	0.118465	4.309	1.63991e-05	0.000443327
chr1	1724838	1745992	SLC35E2A	-	350.587	0.511894	0.151628	3.376	0.000735483	0.00990353
chr19	42268537	42295797	CIC	+	2234.33	0.51305	0.13908	3.68889	0.000225236	0.00385123
chrX	134460165	134520513	HPRT1	+	2109.67	0.513223	0.118417	4.33403	1.46401e-05	0.000405066
chr2	1631887	1744852	PXDN	-	6363.69	0.513703	0.1168	4.39813	1.09187e-05	0.000311863
chr11	33076149	33079454	LINC00294	+	209.087	0.513715	0.184099	2.79043	0.00526383	0.0437128
chr19	2163933	2232578	DOT1L	+	3038.38	0.514359	0.130805	3.93225	8.4154e-05	0.00171016
chr5	154857553	154876792	CNOT8	+	2014.82	0.514524	0.142385	3.61361	0.000301958	0.00490232
chr22	19756703	19783593	TBX1	+	629.88	0.514543	0.126277	4.07471	4.60722e-05	0.0010443
chrX	108155607	108439497	COL4A6	-	484.379	0.515029	0.148103	3.47749	0.000506124	0.00737206
chr20	35953617	35959472	SCAND1	-	789.969	0.515829	0.177343	2.90865	0.00362992	0.0335303
chr3	183015218	183116075	MCCC1	-	3266.22	0.516244	0.1124	4.5929	4.37134e-06	0.000142593
chr5	115578496	115602479	TICAM2	-	241.614	0.51702	0.174187	2.9682	0.00299554	0.0289534
chr21	44300051	44327376	PFKL	+	10015.2	0.517144	0.129787	3.98456	6.76057e-05	0.00141956
chr1	234604269	234610178	IRF2BP2	-	4327.6	0.517788	0.131177	3.94724	7.90561e-05	0.0016244
chr3	11556069	11771350	VGLL4	-	3733.83	0.518114	0.131866	3.9291	8.52643e-05	0.0017248
chr17	6643311	6651634	MED31	-	1227.18	0.518324	0.144953	3.5758	0.000349158	0.00549698
chr19	14119512	14136613	ASF1B	-	3020.2	0.518341	0.112535	4.60605	4.10381e-06	0.000134362
chr4	158769026	158908050	FNIP2	+	1070.85	0.519227	0.153128	3.3908	0.000696891	0.00951431
chr18	3347696	3383532	LINC01895	-	2800.37	0.520337	0.120597	4.31468	1.59837e-05	0.000434757
chr9	36214441	36277042	GNE	-	3929	0.520795	0.109254	4.76685	1.87132e-06	6.84988e-05
chr3	52221081	52231190	ENSG00000173366	-	900.371	0.521054	0.163734	3.18231	0.00146104	0.0170053
chr5	95885098	95961851	ELL2	-	5809.56	0.521493	0.145935	3.57346	0.000352301	0.00551699
chr19	1177558	1228431	STK11	+	191.676	0.52158	0.185315	2.81456	0.00488441	0.0415975
chr16	56865207	56915850	SLC12A3	+	8725.61	0.521817	0.145049	3.59752	0.000321268	0.00514596
chr15	32519848	32536926	WHAMMP1	-	239.571	0.522032	0.175896	2.96785	0.00299888	0.0289534
chr22	36281280	36388010	MYH9	-	38667	0.522274	0.135708	3.84852	0.000118835	0.00225671
chr15	75639085	75648706	IMP3	-	2284.29	0.522294	0.147582	3.53902	0.00040162	0.00616911
chr1	42959049	42996814	SLC2A1-DT	+	752.94	0.522473	0.159881	3.26789	0.00108351	0.0134999
chr17	48048329	48061545	NFE2L1	+	4880.04	0.524092	0.149744	3.49991	0.00046541	0.00699699
chr3	120094895	120136783	GSK3B-DT	+	483.195	0.524579	0.142443	3.68272	0.000230755	0.00391155
chr4	6693878	6697170	S100P	+	4993.3	0.525012	0.176468	2.97511	0.00292881	0.0285296
chr9	34989641	34998900	DNAJB5	+	201.323	0.525671	0.192316	2.73337	0.00626902	0.0496578
chr19	38815422	38831841	ECH1	-	5728.39	0.525704	0.137963	3.81047	0.000138705	0.00257302
chr18	74590317	74598885	ZNF407-AS1	-	196.426	0.525926	0.188961	2.78325	0.00538165	0.0443785
chr20	44694892	44746021	KCNK15-AS1	-	192.594	0.526119	0.179799	2.92616	0.00343178	0.0321496
chr3	127571232	127598267	TPRA1	-	4447.16	0.526817	0.123686	4.2593	2.05069e-05	0.000531616
chr12	14762504	14767931	ENSG00000261324	-	189.861	0.527052	0.180319	2.92289	0.00346803	0.0324245
chr2	219209772	219222738	ENSG00000284820	-	4189.35	0.527066	0.14816	3.55742	0.000374517	0.00580829
chr19	5691834	5720572	LONP1	-	17584.6	0.52733	0.139359	3.78397	0.000154346	0.00282196
chr2	95122087	95165668	ZNF514	-	210.075	0.52747	0.168511	3.13019	0.00174693	0.0194128
chrX	135032355	135033546	RTL8C	+	1511.41	0.528493	0.161348	3.27548	0.00105483	0.0132359
chr7	116524994	116561179	CAV1	+	3378.57	0.529111	0.128265	4.12514	3.70507e-05	0.000871085
chr1	201507241	201534784	CSRP1-AS1	+	768.845	0.530414	0.126071	4.20727	2.58471e-05	0.000643629
chr12	132725503	132761832	ANKLE2	-	6598.56	0.531354	0.112824	4.70961	2.48197e-06	8.70658e-05
chr18	58044226	58401540	NEDD4L	+	3052.81	0.531426	0.153716	3.4572	0.000545818	0.00783284
chr6	113857345	113863475	MARCKS	+	3936.43	0.532799	0.146877	3.62752	0.000286158	0.00468018
chr1	77888513	77943895	NEXN	+	558.865	0.533887	0.143538	3.71947	0.000199639	0.00351206
chr12	124911604	124917368	UBC	-	13726	0.534143	0.159631	3.34612	0.000819518	0.0108128
chr17	58095672	58101479	ENSG00000279207	+	175.755	0.534426	0.184012	2.9043	0.00368075	0.0338759
chr19	13882348	13906452	BRME1	-	286.715	0.535013	0.166212	3.21886	0.00128703	0.0152754
chr1	31409565	31434680	SERINC2	+	571.684	0.535527	0.181989	2.94263	0.00325434	0.030719
chr6	30489509	30494194	HLA-E	+	2126.13	0.535885	0.144427	3.71041	0.000206921	0.00360785
chr1	235327350	235344532	GGPS1	+	2074.13	0.536478	0.130596	4.10793	3.99218e-05	0.000932327
chr3	167735243	167825569	SERPINI1	+	3717.95	0.536972	0.129272	4.15383	3.26954e-05	0.000787541
chr6	3722614	3751713	PXDC1	-	3674.06	0.537296	0.103377	5.19744	2.02052e-07	9.32712e-06
chr15	100849561	100861756	ENSG00000232386	+	737.76	0.537318	0.137723	3.90144	9.56239e-05	0.00189913
chr5	178113532	178126081	N4BP3	+	780.68	0.537584	0.131965	4.07369	4.62735e-05	0.00104752
chr17	7404874	7419860	NLGN2	+	681.074	0.537845	0.138572	3.88135	0.000103876	0.00203607
chr12	57771492	57782541	EEF1AKMT3	+	191.731	0.537857	0.18878	2.84912	0.00438401	0.0386545
chr22	39223359	39244982	PDGFB	-	407.367	0.538226	0.183375	2.93511	0.00333425	0.0313728
chr17	78174091	78187233	TK1	-	6624.44	0.538699	0.140115	3.84469	0.000120704	0.0022873
chr1	181088700	181092900	IER5	+	1087.12	0.538977	0.131893	4.08647	4.37977e-05	0.00100174
chr12	109999186	110039763	ANKRD13A	+	2291.29	0.538987	0.124174	4.34057	1.42113e-05	0.000394277
chr18	23134564	23260470	CABLES1	+	1965.92	0.539093	0.123962	4.34888	1.36836e-05	0.000380387
chr14	67659820	67690367	ENSG00000258466	-	3166.38	0.539605	0.130439	4.13685	3.52102e-05	0.000833354
chr11	75260129	75262466	ENSG00000279117	-	260.175	0.539786	0.170076	3.1738	0.00150459	0.0173636
chr6	27247701	27256624	PRSS16	+	194.502	0.540046	0.188132	2.87057	0.00409734	0.0365495
chr12	46358188	46372773	SLC38A2	-	44043	0.540642	0.117251	4.611	4.00742e-06	0.000131694
chr2	201621646	201623430	ENO1P4	-	129.554	0.541551	0.195821	2.76554	0.00568291	0.0460256
chr14	24138959	24141591	EMC9	-	411.278	0.541874	0.179544	3.01806	0.00254399	0.0255701
chr17	9822206	9892099	GLP2R	+	2936.95	0.542146	0.113973	4.75681	1.96674e-06	7.15473e-05
chr4	88725955	89111398	FAM13A	-	3423.46	0.542708	0.133455	4.06659	4.77065e-05	0.00107309
chr16	29663279	29698699	QPRT	+	1598.22	0.542959	0.128862	4.21349	2.51455e-05	0.000634198
chr16	46884362	46931289	GPT2	+	1710.97	0.543175	0.1698	3.19891	0.00137947	0.0162053
chr1	65792514	66374579	PDE4B	+	7298.07	0.543185	0.130204	4.17181	3.0219e-05	0.000739988
chr17	17202649	17237185	ENSG00000264187	-	1783.7	0.543285	0.120297	4.5162	6.29582e-06	0.000196314
chr9	99104038	99154192	TGFBR1	+	20624.1	0.544071	0.136482	3.98641	6.7081e-05	0.00141466
chr17	28950513	29057216	PIPOX	+	213.975	0.544711	0.179886	3.02809	0.00246101	0.0249041
chr16	31083439	31094956	ENSG00000255439	-	4241.87	0.545022	0.147221	3.70207	0.000213845	0.00370302
chr15	89518523	89591956	ENSG00000259713	+	1187.36	0.545209	0.141975	3.84017	0.00012295	0.00232239
chr11	57338352	57372396	P2RX3	+	236.438	0.546227	0.183931	2.96974	0.00298052	0.0288426
chr16	69398402	69466264	CYB5B	+	7911.97	0.546917	0.146412	3.73547	0.000187367	0.00333937
chr11	65375192	65383701	SLC25A45	-	447.163	0.546956	0.158271	3.45581	0.000548645	0.00785979
chr12	110468415	110490385	FAM216A	+	1203.13	0.548336	0.138303	3.96475	7.34727e-05	0.00152107
chr19	49877666	49888750	TBC1D17	+	1283.42	0.54855	0.118157	4.64255	3.44133e-06	0.000115891
chr17	59331655	59401729	YPEL2	+	205.699	0.549712	0.181546	3.02794	0.00246224	0.0249041
chr15	40906811	40910337	ENSG00000251161	+	199.843	0.550806	0.20098	2.74061	0.00613257	0.0487324
chr7	88270892	88306894	STEAP4	-	4840.1	0.551828	0.173255	3.18506	0.00144724	0.016867
chr6	105993463	106109939	PRDM1	+	428.278	0.5519	0.196051	2.81508	0.00487645	0.0415497
chr11	67627938	67629937	NUDT8	-	188.77	0.552164	0.177254	3.1151	0.00183882	0.0201354
chr11	61799627	61829318	FADS1	-	11795.1	0.552361	0.113276	4.87624	1.08127e-06	4.2424e-05
chr22	49960768	49964072	PIM3	+	4059.91	0.553316	0.111678	4.95455	7.24967e-07	2.99473e-05
chr15	98880659	98893535	ENSG00000259621	-	164.844	0.553334	0.196528	2.81554	0.00486952	0.0415307
chr19	39825350	39834201	DYRK1B	-	327.312	0.553903	0.171168	3.23603	0.00121204	0.0145992
chr1	44635238	44674481	TMEM53	-	280.414	0.553964	0.168149	3.29448	0.000986047	0.0125342
chr2	73228010	73233239	PRADC1	-	828.684	0.554001	0.179354	3.08886	0.00200923	0.0214004
chr3	52228612	52246788	TWF2	-	1378.5	0.554003	0.154887	3.57683	0.000347791	0.00548034
chr11	118253416	118264536	MPZL2	-	762.229	0.554139	0.164124	3.37635	0.000734546	0.00989846
chr16	87383953	87404779	MAP1LC3B	+	757.952	0.555339	0.149337	3.71871	0.000200246	0.00351923
chr19	32978592	33064888	RHPN2	-	1239.07	0.555446	0.136863	4.05842	4.94055e-05	0.00110568
chr5	173707614	173746279	LINC01484	-	802.699	0.556703	0.159081	3.4995	0.000466129	0.00700184
chr16	84819985	84920768	CRISPLD2	+	441.962	0.557365	0.203749	2.73555	0.00622767	0.0494113
chr1	151982915	151993859	S100A10	-	2781.12	0.557527	0.160546	3.4727	0.000515248	0.00747299
chr2	218398256	218405941	CTDSP1	+	1865.65	0.558235	0.119835	4.65835	3.18751e-06	0.00010796
chr19	45764785	45769252	SIX5	-	977.384	0.558453	0.133537	4.18201	2.88942e-05	0.000711491
chr16	30757423	30762221	CFAP119	-	240.942	0.559158	0.192976	2.89756	0.00376077	0.0343975
chr16	31090842	31095980	VKORC1	-	3875.23	0.55985	0.149699	3.73982	0.000184149	0.0032953
chr9	129094142	129111189	CRAT	-	636.476	0.559979	0.132551	4.22462	2.39344e-05	0.000608864
chr4	128269237	128288829	PGRMC2	-	2171.21	0.560272	0.12495	4.48395	7.32729e-06	0.000222929
chr15	40764068	40767708	GCHFR	+	2058.7	0.560338	0.142059	3.9444	7.99992e-05	0.00163892
chr19	1782075	1812276	ATP8B3	-	615.296	0.560437	0.145571	3.84992	0.000118158	0.00225112
chr14	44897275	44907257	C14orf28	+	135.596	0.560671	0.202113	2.77404	0.0055364	0.0453165
chr4	2793071	2841098	SH3BP2	+	790.409	0.561118	0.182166	3.08026	0.00206821	0.0218304
chr2	98793846	98936259	CRACDL	-	353.567	0.561389	0.142384	3.94277	8.0545e-05	0.00164819
chrX	119870475	119871733	RNF113A	-	612.676	0.561638	0.16608	3.38172	0.000720333	0.00978148
chr1	169105697	169310992	ATP1B1	+	10052.2	0.562499	0.128884	4.36438	1.27484e-05	0.000358333
chr6	2663629	2770330	MYLK4	-	670.344	0.564401	0.198429	2.84435	0.00445024	0.0389506
chr19	589881	617159	HCN2	+	920.218	0.564644	0.14588	3.8706	0.000108566	0.00210005
chr8	102648784	102655725	KLF10	-	1555.61	0.564832	0.161484	3.49777	0.000469169	0.00701604
chr14	22598290	22612963	ABHD4	+	426.335	0.565724	0.151856	3.7254	0.000195003	0.00343733
chr12	77021248	77065569	E2F7	-	2553.23	0.565787	0.131913	4.2891	1.79402e-05	0.000477685
chr1	155135344	155138857	SLC50A1	+	2541.09	0.566234	0.132803	4.26372	2.01047e-05	0.000523493
chr17	68420948	68457513	WIPI1	-	651.73	0.567599	0.13165	4.31142	1.62211e-05	0.000439186
chr2	28392448	28417317	FOSL2	+	4373.52	0.5676	0.146192	3.88257	0.000103358	0.00202817
chr4	183505058	183512429	ING2	+	518.287	0.567951	0.142001	3.99964	6.34399e-05	0.00135135
chr3	183697797	183812624	YEATS2	+	4210.83	0.568771	0.14064	4.04418	5.25075e-05	0.00116042
chr8	125430358	125438403	TRIB1	+	631.519	0.569132	0.138798	4.10043	4.12382e-05	0.000956813
chr8	120535745	120813273	SNTB1	-	1375.1	0.572208	0.156701	3.6516	0.000260612	0.00434272
chr17	35243071	35273655	SLFN5	+	1763.71	0.572312	0.148679	3.84931	0.000118453	0.00225336
chr1	28592200	28595449	RAB42	+	664.624	0.572609	0.161518	3.54517	0.000392365	0.00604269
chr21	44849585	44873903	PTTG1IP	-	4539.04	0.573299	0.133182	4.30462	1.67272e-05	0.000449447
chr3	196706277	196712250	CEP19	-	219.872	0.575357	0.166035	3.46527	0.000529708	0.00763263
chr3	113286930	113441610	CFAP44	-	1842.93	0.576926	0.181353	3.18123	0.00146649	0.0170534
chr14	93182199	93184923	MOAP1	-	453.922	0.577115	0.14515	3.976	7.00854e-05	0.00145606
chr19	18279694	18281622	JUND	-	1598.42	0.577122	0.140699	4.10183	4.09904e-05	0.000953184
chr21	29194071	29630751	BACH1	+	7986.75	0.578969	0.160609	3.60483	0.000312357	0.00503416
chr2	237627587	237813682	LRRFIP1	+	4310.85	0.580393	0.127169	4.56396	5.01965e-06	0.000161948
chr7	128455840	128493859	ENSG00000273184	+	1755.75	0.581377	0.171818	3.38369	0.000715195	0.00972665
chrX	15825806	15854931	AP1S2	-	816.135	0.581513	0.13604	4.27456	1.91515e-05	0.000503867
chr6	73593379	73653992	SLC17A5	-	1175.71	0.581569	0.128477	4.52662	5.99343e-06	0.000188213
chr11	14877440	14892231	CYP2R1	-	796.972	0.581691	0.130857	4.44523	8.77981e-06	0.000260012
chr12	14767999	14771131	H4-16	-	2322.81	0.582781	0.143967	4.04802	5.16526e-05	0.0011487
chr16	634427	636366	METTL26	-	2396.71	0.58345	0.148028	3.94148	8.09803e-05	0.00165327
chr17	82078338	82098294	FASN	-	40756.8	0.583783	0.157965	3.69565	0.000219323	0.00377937
chr6	10404502	10407928	TFAP2A-AS2	+	154.136	0.584549	0.201765	2.89718	0.00376533	0.0344056
chr1	100036632	100038042	ENSG00000288826	-	223.708	0.584796	0.181564	3.22088	0.00127799	0.0152052
chr1	96446930	96448318	EEF1A1P11	+	129.498	0.584841	0.205897	2.84046	0.00450483	0.0392342
chr9	86948629	87002033	GAS1RR	+	644.427	0.58491	0.148185	3.94717	7.9082e-05	0.0016244
chr3	105366909	105576900	ALCAM	+	1719.83	0.585102	0.148758	3.93324	8.38069e-05	0.00170507
chr20	50190830	50192668	CEBPB	+	1175.17	0.585959	0.187157	3.13084	0.00174308	0.0193822
chr22	35380361	35394214	HMOX1	+	1299.31	0.586995	0.151076	3.88543	0.000102148	0.00200888
chr12	10158301	10172138	OLR1	-	2055.82	0.589762	0.199049	2.9629	0.00304751	0.0292985
chr1	45016399	45306209	ZSWIM5	-	1257.24	0.592035	0.187158	3.1633	0.00155994	0.0177934
chr16	89046172	89052975	ENSG00000256982	-	307.738	0.592409	0.207301	2.85773	0.00426685	0.0377325
chr22	38291918	38398522	TPTEP2-CSNK1E	-	7081.19	0.592468	0.120084	4.93378	8.06537e-07	3.30061e-05
chr17	81303771	81309278	LINC00482	-	281.445	0.592523	0.154423	3.83702	0.000124535	0.00234731
chr11	67006778	67050863	SYT12	+	3161.13	0.593198	0.125605	4.72273	2.32696e-06	8.22812e-05
chr7	141074064	141480380	TMEM178B	+	5013.35	0.59371	0.194959	3.04531	0.00232438	0.0237818
chr17	7581964	7584098	ENSG00000233223	-	255.427	0.593771	0.177598	3.34335	0.00082774	0.0108806
chr19	5782960	5784746	PRR22	-	131.421	0.594451	0.199891	2.97387	0.00294071	0.0285973
chr16	87780134	87806476	ENSG00000260177	-	3224.19	0.596343	0.114172	5.22321	1.75846e-07	8.22477e-06
chr19	12763003	12872740	HOOK2	-	13515.3	0.596652	0.144493	4.12929	3.63878e-05	0.000856639
chr4	88523810	88708450	HERC3	+	797.11	0.596991	0.181386	3.29129	0.000997308	0.0126488
chr1	205504596	205532793	CDK18	+	954.364	0.597334	0.140025	4.26592	1.99082e-05	0.000519907
chr4	85100496	85100823	RN7SKP48	+	119.4	0.597693	0.212612	2.81119	0.00493579	0.0418433
chr10	100996618	101007836	LZTS2	+	3468.13	0.598208	0.127946	4.67547	2.93279e-06	0.000100488
chr17	28455752	28614197	RSKR	-	17675.4	0.599684	0.146474	4.09414	4.23732e-05	0.000978014
chr19	12796820	12801800	PRDX2	-	12572.7	0.600604	0.146813	4.09095	4.29605e-05	0.000986419
chr7	92112176	92245924	ENSG00000289027	-	14785.1	0.600769	0.124064	4.84241	1.28271e-06	4.95161e-05
chr11	13276652	13387266	ARNTL	+	1692.55	0.600808	0.184913	3.24913	0.00115758	0.0140756
chr17	8188345	8190180	BORCS6	-	502.667	0.601205	0.149642	4.01761	5.87907e-05	0.00127259
chr1	28259518	28282491	SESN2	+	543.773	0.601875	0.191176	3.14828	0.00164237	0.0185186
chr11	74171267	74254703	PPME1	+	5431.35	0.60413	0.124849	4.83888	1.30571e-06	5.00757e-05
chr4	26163455	26435131	RBPJ	+	2356.95	0.604218	0.136245	4.43479	9.216e-06	0.000270214
chr11	46856717	46918642	LRP4	-	569.492	0.605133	0.143455	4.21828	2.46176e-05	0.000624446
chr11	74876286	74920022	RPL31P46	+	220.936	0.605309	0.21621	2.79963	0.00511604	0.0428349
chr11	121292681	121313410	SC5D	+	1390.52	0.6063	0.149049	4.06778	4.7463e-05	0.00106898
chr1	155277463	155289848	HCN3	+	418.414	0.607068	0.162037	3.74647	0.000179342	0.00322888
chr19	2476122	2478259	GADD45B	+	409.317	0.607507	0.1627	3.73391	0.000188531	0.00334325
chr16	50742050	50801935	CYLD	+	2039.76	0.607929	0.124598	4.87912	1.06559e-06	4.20528e-05
chr11	74490519	74493724	LIPT2	-	132.595	0.608663	0.214046	2.84361	0.0044606	0.0389859
chr12	98645290	98735433	APAF1	+	2579.5	0.608836	0.138916	4.38277	1.1718e-05	0.000332544
chr19	44747705	44760044	BCL3	+	431.134	0.609156	0.19766	3.08184	0.00205726	0.0217668
chr21	34787801	36004667	RUNX1	-	1248.14	0.611189	0.170588	3.58283	0.000339887	0.00537496
chr17	76376584	76387860	SPHK1	+	549.894	0.612407	0.138602	4.41845	9.94131e-06	0.000289083
chr7	1082208	1093815	GPER1	+	188.788	0.612415	0.202275	3.02764	0.00246472	0.024915
chr22	50523926	50524780	ENSG00000272821	+	130.699	0.612466	0.199791	3.06553	0.00217288	0.0226861
chr10	104309698	104338465	ITPRIP	-	3596.33	0.613324	0.147206	4.16642	3.09419e-05	0.000754555
chr10	109864766	109923553	XPNPEP1	-	4237.45	0.614251	0.160048	3.83792	0.000124082	0.00234126
chr20	59123381	59259113	ZNF831	+	17176.5	0.61484	0.141658	4.34031	1.42279e-05	0.000394277
chr15	66386837	66491656	MAP2K1	+	3050.31	0.615205	0.13972	4.40311	1.06709e-05	0.000306269
chr19	12833951	12874952	MAST1	+	244.697	0.615536	0.182998	3.36361	0.000769292	0.0102791
chr19	8374372	8390685	RAB11B-AS1	-	237.294	0.616297	0.17479	3.52593	0.000422002	0.0064319
chr16	11359845	11527247	ENSG00000188897	-	112.323	0.616451	0.220302	2.79821	0.00513868	0.0429222
chr17	17212212	17237188	FLCN	-	1607.41	0.616581	0.120421	5.12022	3.05183e-07	1.36254e-05
chr1	11919591	11926428	KIAA2013	-	1344.96	0.617693	0.130195	4.74437	2.09155e-06	7.50074e-05
chr17	83079609	83095122	METRNL	+	1076.87	0.618919	0.161877	3.82338	0.000131636	0.00246017
chr16	57882340	57971128	CNGB1	-	263.579	0.619162	0.206381	3.00009	0.00269897	0.0267927
chr8	40153482	40155310	TCIM	+	2383.14	0.61961	0.138333	4.47913	7.49463e-06	0.000226892
chr9	128729786	128772414	ZER1	-	1762.6	0.620329	0.145138	4.27405	1.9195e-05	0.000504261
chr19	47745546	47757058	NOP53	+	4687.62	0.620463	0.124487	4.98415	6.22332e-07	2.59501e-05
chrX	152830967	152869729	NSDHL	+	3345.44	0.620841	0.151143	4.10764	3.99719e-05	0.000932327
chr10	93306429	93482334	MYOF	-	15594.7	0.621965	0.134838	4.61268	3.97514e-06	0.000130876
chr15	101295419	101305737	SNRPA1-DT	+	152.343	0.622545	0.213182	2.92024	0.00349756	0.0325857
chr18	67506587	67516720	DSEL	-	5195.54	0.623221	0.122121	5.10333	3.33737e-07	1.47881e-05
chr1	230837119	230869589	C1orf198	-	1037.09	0.623847	0.128347	4.86062	1.17019e-06	4.5671e-05
chr1	110947190	110963965	LRIF1	-	581.787	0.624007	0.144901	4.30643	1.65913e-05	0.000446861
chrX	48521806	48545469	ENSG00000286268	+	7369.02	0.624768	0.156329	3.99649	6.42875e-05	0.00136775
chr15	82041778	82046119	MEX3B	-	128.433	0.625964	0.226882	2.75899	0.00579805	0.0466514
chr4	88592434	88708541	HERC3	+	763.7	0.626009	0.186437	3.35775	0.000785785	0.0104403
chr15	91099950	91302565	SV2B	+	127.329	0.62634	0.222968	2.8091	0.00496809	0.0420267
chr7	128671693	128687877	GARIN1A	+	161.816	0.626401	0.185732	3.37262	0.000744576	0.0100107
chr2	117833937	117841658	ENSG00000236255	+	190.459	0.626439	0.183286	3.41783	0.000631235	0.00881536
chr21	44999208	45004727	PICSAR	-	471.588	0.626845	0.177679	3.52796	0.000418778	0.0063993
chr2	187464230	187565760	TFPI	-	2312.28	0.626999	0.163873	3.82613	0.000130175	0.00244061
chr16	8852942	8869012	CARHSP1	-	3871.62	0.627201	0.144191	4.3498	1.36264e-05	0.000379393
chr10	28677510	28682932	BAMBI	+	836.214	0.6274	0.137092	4.5765	4.72811e-06	0.000153207
chr22	42796502	42858106	ARFGAP3	-	2159.18	0.630173	0.170006	3.70677	0.000209919	0.00365292
chr6	138088505	138107419	PERP	-	4680.84	0.631108	0.161097	3.91756	8.94482e-05	0.00179575
chr2	9936360	9939590	ENSG00000269973	+	120.322	0.631468	0.21271	2.96867	0.00299087	0.028927
chr12	4562208	4615302	DYRK4	+	192.098	0.632588	0.17623	3.58956	0.00033124	0.00527123
chr19	45379638	45406349	PPP1R13L	-	1120.07	0.633152	0.129782	4.87858	1.06851e-06	4.20742e-05
chr6	109165831	109355063	CCDC162P	+	623.991	0.633228	0.180738	3.50357	0.000459071	0.00691344
chrX	48521799	48528716	EBP	+	7229.57	0.634212	0.157742	4.02056	5.80603e-05	0.00126417
chrX	107713221	107777342	TSC22D3	-	2279.95	0.634661	0.163954	3.87098	0.000108398	0.00209911
chr20	62642503	62685785	SLCO4A1	+	4861.79	0.635436	0.143278	4.43498	9.2081e-06	0.000270214
chr6	33410399	33416453	PHF1	+	725.928	0.636257	0.145624	4.36916	1.24724e-05	0.000351135
chr3	49716829	49719684	AMIGO3	-	329.912	0.636827	0.147885	4.30624	1.66056e-05	0.000446861
chr9	128411751	128437351	CERCAM	+	1319.74	0.638321	0.15303	4.17122	3.02968e-05	0.000740869
chr10	101570560	101609662	DPCD	+	858.475	0.638815	0.17521	3.646	0.000266358	0.00441384
chr3	45823316	45916042	LZTFL1	-	1361.51	0.639699	0.131937	4.84853	1.24379e-06	4.83301e-05
chr3	48673844	48686364	NCKIPSD	-	1712.06	0.641056	0.152911	4.19235	2.76074e-05	0.000681702
chr12	53708517	53727745	CALCOCO1	-	1222.33	0.641705	0.14286	4.49183	7.0613e-06	0.000215993
chr10	23438958	23530439	ENSG00000287124	+	195.174	0.642488	0.176885	3.63224	0.000280974	0.00461246
chr10	102394110	102402524	NFKB2	+	3775.67	0.642884	0.132002	4.87025	1.11458e-06	4.35967e-05
chr7	139025706	139036042	ZC3HAV1L	-	928.931	0.643717	0.127653	5.04272	4.58951e-07	1.95997e-05
chr7	149102784	149126324	ZNF425	-	334.416	0.644592	0.147852	4.3597	1.3024e-05	0.000364342
chrX	23783173	23786210	SAT1	+	801.99	0.644895	0.210359	3.06568	0.00217174	0.0226861
chr5	173314723	173328447	STC2	-	289.545	0.645178	0.204779	3.1506	0.00162933	0.0184044
chr9	35658290	35661511	CCDC107	+	602.749	0.645349	0.162294	3.97643	6.99589e-05	0.00145515
chr1	63593411	63660245	PGM1	+	21902.8	0.645622	0.135261	4.77317	1.81347e-06	6.66572e-05
chr7	48088628	48108736	UPP1	+	1297.27	0.646347	0.136122	4.74829	2.05145e-06	7.40198e-05
chr2	219219380	219229717	ATG9A	-	2520.66	0.64759	0.151413	4.27698	1.89447e-05	0.000499523
chr10	122879681	122898716	C10orf88B	+	361.28	0.647969	0.149806	4.3254	1.52256e-05	0.000416701
chr3	156747343	156817062	LINC00886	-	1449.98	0.64802	0.141448	4.58134	4.6201e-06	0.00015043
chr1	12567910	12618210	DHRS3	-	1574.24	0.648318	0.15888	4.08055	4.49289e-05	0.00102285
chr2	38814	46870	FAM110C	-	694.851	0.649201	0.159759	4.06362	4.83171e-05	0.00108545
chr22	39242188	39279897	ENSG00000284633	+	113.022	0.649762	0.236293	2.74981	0.00596291	0.0476602
chr5	111496033	111512590	STARD4	-	1489.7	0.650306	0.132145	4.92115	8.60381e-07	3.47295e-05
chr2	63840952	63891562	UGP2	+	5021.33	0.650962	0.160484	4.05624	4.98683e-05	0.00111322
chr12	109573255	109598125	MVK	+	2355.35	0.651521	0.125306	5.19943	1.99899e-07	9.25188e-06
chr12	56266890	56270966	COQ10A	+	710.213	0.652122	0.133293	4.89239	9.96166e-07	3.94893e-05
chr19	3538261	3574290	MFSD12	-	24679.4	0.653569	0.111839	5.84386	5.10052e-09	3.30319e-07
chr12	55743122	55757264	GDF11	+	179.031	0.654415	0.189134	3.46006	0.000540065	0.00777553
chr8	134792020	134798272	MIR30DHG	-	266.609	0.655689	0.184931	3.54558	0.000391754	0.00603855
chr20	35455164	35519280	CEP250	+	4744.49	0.656286	0.128052	5.12517	2.97275e-07	1.33736e-05
chr19	47403124	47419527	MEIS3	-	217.204	0.657942	0.196071	3.35562	0.000791867	0.0105107
chr17	40850800	40863282	ENSG00000265359	+	117.622	0.658033	0.211989	3.10409	0.00190862	0.0206434
chr7	138706294	138799560	ATP6V0A4	-	662.86	0.659191	0.15829	4.16445	3.12111e-05	0.000759026
chr5	172768096	172771195	DUSP1	-	3392.76	0.662336	0.168929	3.9208	8.82559e-05	0.00177921
chr17	75845699	75856507	WBP2	-	2812.22	0.662617	0.165623	4.00076	6.31407e-05	0.0013471
chr11	560404	564025	RASSF7	+	846.141	0.663066	0.123001	5.39073	7.01708e-08	3.57527e-06
chr20	47209214	47356889	ZMYND8	-	3485.09	0.663473	0.128575	5.16021	2.4667e-07	1.124e-05
chr7	140084746	140176983	KDM7A	-	664.927	0.663688	0.186504	3.55856	0.00037289	0.00579323
chr19	12898786	12919293	SYCE2	-	103.518	0.666318	0.231339	2.88026	0.00397344	0.0356878
chr1	55039447	55064852	PCSK9	+	10704.9	0.66705	0.135817	4.9114	9.04267e-07	3.62527e-05
chr17	28725897	28743455	NEK8	+	468.484	0.667923	0.139694	4.78132	1.74152e-06	6.49578e-05
chr18	630886	658350	TYMSOS	-	306.144	0.667933	0.162914	4.09992	4.13302e-05	0.00095769
chr8	29333064	29350684	DUSP4	-	368.365	0.668325	0.162275	4.11848	3.8138e-05	0.000895457
chr19	11483427	11505839	ZNF653	-	535.316	0.668581	0.13927	4.80061	1.5818e-06	5.93763e-05
chr7	128866330	128872047	ATP6V1FNB	+	91.4351	0.668597	0.243776	2.74267	0.00609428	0.0484845
chr2	20560448	20651130	HS1BP3	-	803.545	0.669432	0.162739	4.11353	3.89661e-05	0.000913688
chr11	73376399	73397474	RELT	+	1687.02	0.670073	0.16221	4.13091	3.61326e-05	0.000851765
chr1	39895426	39902256	MYCL	-	259.193	0.670215	0.175596	3.8168	0.000135191	0.00251522
chr1	11785723	11806455	MTHFR	-	952.876	0.670744	0.130981	5.12094	3.04018e-07	1.36077e-05
chr3	72888046	72998138	GXYLT2	+	3495.35	0.670753	0.148205	4.52583	6.01579e-06	0.000188246
chr12	95657807	95791189	NTN4	-	1429.48	0.672007	0.156138	4.30394	1.67787e-05	0.000449944
chr5	75336329	75364001	HMGCR	+	8924.64	0.672252	0.131956	5.09453	3.49606e-07	1.52996e-05
chr2	25926598	25982749	KIF3C	-	126.443	0.672435	0.202811	3.31558	0.000914539	0.0117882
chr17	44345246	44353106	GRN	+	11482	0.674441	0.163244	4.13149	3.6042e-05	0.000850765
chr10	89283694	89309271	IFIT2	+	915.254	0.674446	0.189348	3.56194	0.000368124	0.00572926
chr17	28319200	28328685	TMEM97	+	5995.26	0.674581	0.13221	5.10237	3.35433e-07	1.48261e-05
chr1	8861000	8879190	ENO1	-	123796	0.6748	0.14823	4.55239	5.30409e-06	0.000170813
chr10	23439075	23442377	OTUD1	+	181.37	0.674859	0.178422	3.78238	0.000155335	0.00283712
chr4	112274537	112285904	TIFA	-	1250.48	0.674969	0.131242	5.14294	2.70476e-07	1.22616e-05
chr15	47812729	48050507	ENSG00000259754	+	403.598	0.675562	0.227116	2.97452	0.00293446	0.0285533
chr17	76274049	76308276	QRICH2	-	631.536	0.676453	0.167926	4.02828	5.61873e-05	0.00123403
chr17	44798448	44830816	GJC1	-	613.561	0.67665	0.145161	4.66139	3.14084e-06	0.000106789
chr9	130902438	130939286	FIBCD1	-	259.7	0.676822	0.208681	3.24333	0.0011814	0.0143225
chr6	7541617	7586714	DSP	+	40547.9	0.677523	0.132592	5.10985	3.22417e-07	1.43224e-05
chr22	38290691	38318084	CSNK1E	-	6781.42	0.678684	0.123165	5.51035	3.58122e-08	1.96025e-06
chr4	86886472	86936178	ENSG00000285458	-	673.769	0.680122	0.167511	4.06016	4.90399e-05	0.00109889
chr12	127147149	127150081	ENSG00000278266	+	169.974	0.680462	0.215451	3.15831	0.00158688	0.0180193
chr8	26514031	26658178	DPYSL2	+	2878.9	0.681258	0.145648	4.67742	2.9051e-06	9.99264e-05
chr22	37469063	37486393	MFNG	-	86.9811	0.682332	0.234838	2.90554	0.00366624	0.0337775
chr13	97434169	97469128	RAP2A	+	1125.18	0.682589	0.144321	4.72967	2.24887e-06	7.98394e-05
chr10	80407829	80437115	PRXL2A	+	601.906	0.682603	0.141153	4.8359	1.32544e-06	5.0613e-05
chr10	104313308	104313479	ENSG00000287779	-	93.1722	0.682955	0.246143	2.77463	0.00552644	0.0452651
chr9	86944362	86947506	GAS1	-	3272.43	0.685003	0.131136	5.22359	1.75488e-07	8.22477e-06
chr7	143379683	143381036	FAM131B-AS2	-	87.9993	0.686599	0.231557	2.96514	0.00302548	0.0291501
chr3	170037995	170085392	GPR160	+	267.907	0.687047	0.208238	3.29933	0.000969143	0.0123536
chr16	71464555	71565089	ZNF19	-	237.36	0.687135	0.168129	4.08695	4.37081e-05	0.00100098
chr1	153774354	153780157	SLC27A3	+	243.02	0.688073	0.18508	3.71771	0.000201036	0.00352611
chr1	36306368	36329340	SH3D21	+	526.717	0.688398	0.207692	3.31452	0.000918012	0.0118126
chr8	144477969	144502121	PPP1R16A	+	1892.45	0.689314	0.163754	4.20946	2.55985e-05	0.000642048
chr9	129332300	129359549	LINC01503	+	106.18	0.691282	0.242901	2.84594	0.00442808	0.0388827
chr16	68225969	68229145	ENSG00000262160	-	293.206	0.6913	0.161619	4.27733	1.89148e-05	0.000499523
chr16	74712955	74774831	FA2H	-	210.936	0.69197	0.197002	3.51251	0.000443894	0.00671922
chr7	158856558	158956747	DYNC2I1	+	1947.05	0.692457	0.136373	5.07767	3.82088e-07	1.64764e-05
chr6	29941260	29945884	HLA-A	+	2925.03	0.693209	0.174202	3.97934	6.91067e-05	0.00144081
chr4	86924630	86936202	ENSG00000284968	-	367.16	0.69329	0.190522	3.63891	0.000273799	0.00451908
chr11	57460528	57477534	RTN4RL2	+	937.05	0.69455	0.150407	4.61782	3.878e-06	0.000128155
chr11	47214465	47239217	DDB2	+	2125.55	0.696222	0.12486	5.57601	2.46091e-08	1.39006e-06
chr5	126360132	126496494	GRAMD2B	+	2987.58	0.696259	0.107092	6.5015	7.95213e-11	7.02968e-09
chr7	107168961	107202522	HBP1	+	3362.06	0.697589	0.145461	4.79572	1.6209e-06	6.05866e-05
chr19	2977538	2995179	TLE6	+	251.866	0.698121	0.188405	3.70542	0.000211039	0.0036688
chr16	67148104	67150998	B3GNT9	-	99.6893	0.698683	0.227148	3.0759	0.00209871	0.0220995
chr7	102285091	102321711	SH2B2	+	327.519	0.699033	0.151355	4.61851	3.86504e-06	0.000127966
chr12	55720367	55724705	RDH5	+	197.545	0.699373	0.175636	3.98195	6.8352e-05	0.00142948
chr3	48625723	48635493	SLC26A6	-	5232.37	0.699999	0.164619	4.25224	2.11641e-05	0.000546204
chr19	11466240	11505698	ENSG00000267477	-	579.623	0.700999	0.137986	5.08022	3.76997e-07	1.62966e-05
chr14	67676800	67695793	RDH11	-	3575.97	0.702084	0.137615	5.10181	3.36416e-07	1.48325e-05
chr4	15935577	15938740	FGFBP1	-	125.11	0.702389	0.228709	3.0711	0.00213269	0.0224307
chr12	127146535	127151330	ENSG00000286791	+	247.616	0.702659	0.194682	3.60927	0.000307064	0.00496696
chr4	188091272	188109603	TRIML2	-	551.528	0.706228	0.175624	4.02126	5.78876e-05	0.00126196
chr19	45162928	45178237	TRAPPC6A	-	559.788	0.707084	0.146876	4.81416	1.47821e-06	5.60832e-05
chr15	99014526	99031054	LUNAR1	+	147.977	0.709053	0.200218	3.54141	0.000397997	0.00611877
chr16	56906534	56906956	RPS24P17	+	133.164	0.709844	0.197306	3.59768	0.00032107	0.00514596
chr15	100861924	100885329	ENSG00000272639	+	735.643	0.710075	0.143815	4.93742	7.91626e-07	3.24732e-05
chr8	142700111	142705127	LY6K	+	5744.71	0.710611	0.131124	5.4194	5.9801e-08	3.11883e-06
chr22	42364387	42369290	LINC01315	-	176.727	0.711099	0.210005	3.3861	0.000708942	0.00965331
chr17	4143168	4187310	CYB5D2	+	1199.62	0.7132	0.130191	5.47812	4.29873e-08	2.31008e-06
chr19	48968130	48993310	GYS1	-	4410.92	0.715527	0.17445	4.10161	4.10279e-05	0.000953184
chr2	218274197	218292586	TMBIM1	-	2333.56	0.71583	0.153119	4.67498	2.93983e-06	0.000100534
chr16	3930806	3950586	LINC02861	-	621.537	0.716786	0.150142	4.77405	1.80558e-06	6.66445e-05
chr2	68284171	68320051	CNRIP1	-	435.836	0.719083	0.148529	4.84137	1.28948e-06	4.96687e-05
chr12	52022832	52059507	NR4A1	+	2060.56	0.719253	0.148631	4.83918	1.30377e-06	5.00757e-05
chr15	88635670	88656483	ISG20	+	640.366	0.719797	0.218544	3.2936	0.000989149	0.0125633
chr17	63849292	63864379	TCAM1P	+	125.126	0.721186	0.225389	3.19975	0.00137549	0.0161801
chr12	98512973	98516422	TMPO-AS1	-	424.014	0.721749	0.146618	4.92263	8.53872e-07	3.46249e-05
chr19	29665459	29675477	PLEKHF1	+	380.549	0.721919	0.153322	4.7085	2.49542e-06	8.73644e-05
chr14	72969451	73027131	ZFYVE1	-	436.438	0.721924	0.170474	4.2348	2.28757e-05	0.000585299
chr17	76712832	76726799	JMJD6	-	2963.44	0.722238	0.14395	5.0173	5.2404e-07	2.21122e-05
chr19	49119544	49151026	PPFIA3	+	658.301	0.723797	0.159269	4.54448	5.50702e-06	0.000176384
chr11	9758268	9811335	SBF2-AS1	+	1141.04	0.72391	0.132369	5.46886	4.52928e-08	2.4266e-06
chr7	1464497	1467522	ENSG00000273230	-	155.772	0.724305	0.228386	3.17141	0.001517	0.0174386
chr6	692530	796781	ENSG00000271727	+	263.049	0.725119	0.219714	3.30029	0.000965851	0.0123205
chr8	11795573	11839304	FDFT1	+	9395.62	0.725383	0.132338	5.48131	4.22188e-08	2.2757e-06
chr19	55132698	55149206	TNNT1	-	2976.03	0.726214	0.163882	4.43133	9.36523e-06	0.000273681
chr19	11164270	11197791	KANK2	-	3570.48	0.72738	0.137418	5.2932	1.20194e-07	5.83798e-06
chr3	129555214	129606676	PLXND1	-	2467.07	0.72813	0.143059	5.08971	3.58603e-07	1.5616e-05
chr7	102433106	102456825	ORAI2	+	88.5716	0.729	0.237901	3.06429	0.00218185	0.0227179
chr17	74424851	74451653	GPRC5C	+	1387.02	0.729232	0.185466	3.93188	8.42838e-05	0.00171084
chr1	153678688	153693992	NPR1	+	4024.3	0.729317	0.135753	5.37239	7.77017e-08	3.91386e-06
chr5	904319	912587	ENSG00000287600	-	115.02	0.730987	0.224915	3.25006	0.00115379	0.014049
chr15	48408313	48645721	FBN1	-	2716.87	0.732029	0.17394	4.20852	2.57044e-05	0.000642048
chr11	63573195	63616883	PLAAT3	-	1726.91	0.733351	0.138503	5.29482	1.19132e-07	5.81838e-06
chr15	100849831	100876836	GCAWKR	+	1311.09	0.733538	0.130947	5.60179	2.12147e-08	1.22174e-06
chr11	64245838	64248221	PPP1R14B-AS1	+	246.444	0.735153	0.201495	3.64848	0.000263792	0.00437919
chr12	31019434	31073847	DDX11-AS1	-	186.76	0.736293	0.207647	3.54588	0.000391304	0.00603687
chr15	39799008	39920266	GPR176	-	663.635	0.736914	0.165796	4.44471	8.80103e-06	0.000260204
chr6	1389576	1395603	FOXF2	+	343.09	0.738102	0.1676	4.40394	1.06304e-05	0.000305601
chr17	18183078	18209954	ALKBH5	+	6470.58	0.738135	0.131488	5.61369	1.98059e-08	1.14809e-06
chr17	27294076	27315926	WSB1	+	3289.7	0.740105	0.160406	4.61395	3.95095e-06	0.000130322
chr6	31394289	31395495	ENSG00000272221	-	75.3167	0.740568	0.265883	2.78531	0.00534765	0.0442633
chr12	89708959	89712590	ATP2B1-AS1	+	74.6035	0.741048	0.25138	2.94792	0.00319917	0.0303671
chr11	65916810	65919062	C11orf68	-	315.781	0.741273	0.176355	4.2033	2.63048e-05	0.000651636
chr3	47562238	47580792	CSPG5	-	281.492	0.741522	0.177492	4.17777	2.94376e-05	0.000723862
chr2	30146941	30160533	YPEL5	+	960.212	0.742587	0.146931	5.05399	4.32683e-07	1.85226e-05
chr11	118721104	118729412	ENSG00000287238	-	828.29	0.743179	0.15549	4.77958	1.75663e-06	6.52464e-05
chr19	47220822	47232766	BBC3	-	266.278	0.745222	0.182633	4.08043	4.4952e-05	0.00102285
chr3	122886941	122892416	LINC02035	+	241.965	0.74561	0.188546	3.95452	7.66896e-05	0.00158027
chr19	45485294	45497055	RTN2	-	488.292	0.745939	0.167919	4.44224	8.90261e-06	0.00026233
chr1	155063748	155086807	ENSG00000251246	+	686.78	0.746253	0.138432	5.39077	7.01545e-08	3.57527e-06
chr14	54566117	54793315	SAMD4A	+	1339.65	0.747235	0.188778	3.95828	7.54913e-05	0.00155921
chr1	44187943	44189049	ENSG00000271329	-	94.7393	0.747475	0.244832	3.05302	0.00226553	0.0233862
chr6	29887752	29890482	HLA-H	+	127.274	0.749437	0.222351	3.37052	0.000750268	0.0100643
chr12	57517712	57520480	ENSG00000285133	-	254.493	0.749459	0.204451	3.66571	0.000246653	0.00414027
chr6	31268749	31272130	HLA-C	-	1816.13	0.749521	0.175463	4.27168	1.94002e-05	0.000508142
chr10	29457338	29736959	SVIL	-	7181.79	0.749542	0.143693	5.21628	1.8255e-07	8.5158e-06
chr14	23295652	23302859	PPP1R3E	-	324.349	0.750488	0.176034	4.26332	2.01412e-05	0.000523671
chr7	75092573	75149817	GTF2IRD2B	+	111.554	0.75133	0.234433	3.20489	0.00135115	0.0159255
chr6	29826967	29831125	HLA-G	+	139.071	0.752436	0.242334	3.10496	0.00190307	0.0206346
chr10	73110375	73131828	NUDT13	+	165.613	0.752657	0.203865	3.69193	0.00022256	0.00382397
chr9	124777133	124814885	OLFML2A	+	1373.27	0.756592	0.158394	4.77665	1.78241e-06	6.59267e-05
chr17	43766125	43778977	DUSP3	-	4371.44	0.758404	0.123817	6.12521	9.05655e-10	6.56228e-08
chr1	32333839	32336233	MARCKSL1	-	616.681	0.758878	0.162675	4.66498	3.08641e-06	0.00010514
chr11	2883213	2885775	CDKN1C	-	360.653	0.759459	0.160429	4.73392	2.20229e-06	7.83429e-05
chr10	7158624	7411488	SFMBT2	-	4526.65	0.760127	0.14577	5.21455	1.84263e-07	8.57309e-06
chr1	20633458	20651511	PINK1	+	4029.67	0.76156	0.149845	5.08233	3.7284e-07	1.61564e-05
chr6	2987967	2991173	LINC01011	+	79.4667	0.762383	0.26825	2.84206	0.00448226	0.039134
chr5	150053291	150113372	CSF1R	-	140.823	0.763183	0.270078	2.82579	0.00471645	0.0405918
chr12	127130005	127207706	ENSG00000286016	+	524.72	0.763565	0.173741	4.39485	1.10851e-05	0.000315596
chr19	11377207	11384342	EPOR	-	373.662	0.764015	0.162599	4.69877	2.61737e-06	9.14526e-05
chr5	173056352	173139284	CREBRF	+	711.88	0.76414	0.14434	5.29402	1.19654e-07	5.82779e-06
chr7	106248298	106285966	NAMPT	-	2545.21	0.7647	0.141516	5.40362	6.5311e-08	3.34695e-06
chr6	10429255	10435015	LINC00518	-	66.0382	0.765247	0.265137	2.88623	0.00389883	0.0353494
chr4	47593999	47838106	CORIN	-	344.612	0.765791	0.189129	4.04904	5.14281e-05	0.00114515
chr7	54752250	54759974	SEC61G	-	3141.3	0.765825	0.18859	4.0608	4.89055e-05	0.00109727
chr2	206274663	206314427	ZDBF2	+	1917.33	0.767086	0.141134	5.43516	5.47475e-08	2.88936e-06
chr10	125896564	126009592	FANK1	+	413.24	0.767655	0.184355	4.16399	3.12731e-05	0.000759489
chr14	102501767	102509799	ANKRD9	-	838.442	0.767689	0.135719	5.65646	1.5453e-08	9.10695e-07
chr10	95311771	95561414	SORBS1	-	1048.86	0.768396	0.146016	5.26241	1.42181e-07	6.81237e-06
chr3	48636463	48662886	CELSR3	-	1092.55	0.769724	0.143782	5.35341	8.63111e-08	4.33517e-06
chr3	134351852	134356561	RPL39P5	-	651.582	0.774255	0.186028	4.16203	3.15434e-05	0.000763956
chr12	31589923	31615666	DENND5B-AS1	+	306.538	0.775083	0.183604	4.22149	2.42693e-05	0.000616497
chr16	15434475	15625028	BMERB1	+	96.742	0.77604	0.250692	3.0956	0.00196418	0.0210848
chr17	7913339	7916289	RNF227	-	263.635	0.777915	0.172475	4.5103	6.47372e-06	0.000200799
chr6	31353872	31367067	HLA-B	-	935.164	0.77843	0.193375	4.02549	5.68566e-05	0.00124275
chr12	131029110	131035487	ENSG00000256810	-	114.918	0.778696	0.279739	2.78365	0.0053751	0.0443452
chr5	132440440	132508719	IRF1	-	920.484	0.779508	0.120983	6.44313	1.17033e-10	9.99585e-09
chr22	50529710	50532506	ODF3B	-	194.726	0.78166	0.182097	4.29256	1.76628e-05	0.000472432
chr11	65773898	65780976	AP5B1	-	1674.14	0.782965	0.135677	5.7708	7.88948e-09	4.96391e-07
chr19	1446302	1473244	APC2	+	68.0056	0.783189	0.281231	2.78486	0.00535515	0.0443047
chr3	134355347	134375479	AMOTL2	-	5776	0.784421	0.157252	4.98831	6.09101e-07	2.55187e-05
chrX	149511509	149526264	ENSG00000238039	-	96.1519	0.785155	0.287235	2.73349	0.00626668	0.0496578
chr15	59594875	59640239	GCNT3	+	114.311	0.787388	0.256831	3.06579	0.00217099	0.0226861
chr19	10566460	10569059	CDKN2D	-	160.61	0.787974	0.195572	4.02906	5.59997e-05	0.00123144
chr5	96390333	96434143	PCSK1	-	8653.82	0.78856	0.131563	5.99376	2.05039e-09	1.4216e-07
chr2	20447074	20449440	RHOB	+	12979.2	0.788902	0.125798	6.2712	3.58265e-10	2.81517e-08
chr12	57128483	57213361	LRP1	+	2854.77	0.789428	0.177749	4.44126	8.94316e-06	0.000263087
chr6	142751469	142956698	HIVEP2	-	2992.27	0.789556	0.187285	4.2158	2.48897e-05	0.000629543
chr6	7726099	7881728	BMP6	+	5554.58	0.789884	0.185578	4.25634	2.07799e-05	0.000537905
chr8	47736913	47738164	CEBPD	-	560.985	0.789958	0.157151	5.02674	4.989e-07	2.11831e-05
chr22	45604432	45620858	LINC01589	-	131.005	0.790157	0.200635	3.93828	8.20686e-05	0.00167163
chr3	196012511	196082153	TFRC	-	96761.9	0.790258	0.150926	5.23608	1.64023e-07	7.72912e-06
chr14	74480133	74480204	MIR4709	-	246.76	0.796229	0.186173	4.27682	1.89582e-05	0.000499523
chr3	156673235	156706770	TIPARP	+	4173.56	0.797715	0.142938	5.58083	2.39369e-08	1.36047e-06
chr17	1633858	1645744	SCARF1	-	96.3079	0.798299	0.244648	3.26305	0.00110219	0.0136462
chr1	998962	1000172	HES4	-	294.935	0.798941	0.177697	4.49609	6.92135e-06	0.000212216
chr5	177611240	177619754	ENSG00000247679	+	75.5994	0.799082	0.257309	3.10554	0.00189935	0.0206142
chr11	64234584	64239264	VEGFB	+	872.863	0.805758	0.158295	5.09022	3.57644e-07	1.56127e-05
chr20	45252239	45254564	SLPI	-	1634.9	0.805909	0.160333	5.02646	4.99624e-07	2.11831e-05
chr8	140636281	140638283	ERICD	+	61.5074	0.806642	0.28501	2.83022	0.00465159	0.0402349
chr8	94925972	94949378	TP53INP1	-	227.668	0.807011	0.211801	3.81023	0.000138838	0.00257302
chrX	7147237	7804358	STS	+	1804.86	0.807543	0.159145	5.07427	3.88982e-07	1.67329e-05
chr10	97426191	97433444	PGAM1	+	1544.57	0.808174	0.143301	5.63971	1.70339e-08	9.93925e-07
chr2	200810594	200827338	BZW1	+	10062.9	0.808359	0.1643	4.92002	8.65354e-07	3.47715e-05
chr19	41350853	41425001	ENSG00000255730	+	3189.5	0.810744	0.146144	5.54759	2.89638e-08	1.61031e-06
chr9	136803927	136808848	CCDC183-AS1	-	211.193	0.811044	0.192958	4.20321	2.63161e-05	0.000651636
chr19	48047843	48110817	PLA2G4C	-	97.9377	0.812242	0.220458	3.68434	0.000229298	0.00390239
chr19	36034984	36054739	THAP8	-	148.639	0.813468	0.204304	3.98166	6.84368e-05	0.00142948
chr19	44631573	44725217	CEACAM16-AS1	-	342.553	0.813946	0.15691	5.18733	2.13331e-07	9.79662e-06
chrX	16946658	17153272	REPS2	+	731.414	0.815477	0.179885	4.53333	5.80618e-06	0.000183966
chr7	5274369	5306912	SLC29A4	+	73.0324	0.815591	0.267242	3.05188	0.00227411	0.0234516
chr18	23453287	23486603	RIOK3	+	1861.58	0.816498	0.178753	4.56775	4.92999e-06	0.000159346
chr17	21238870	21253410	NATD1	-	190.162	0.81751	0.181832	4.49596	6.92582e-06	0.000212216
chr1	58784384	58901109	LINC01135	+	795.059	0.81775	0.22341	3.66032	0.000251901	0.00421345
chr8	134715820	134799296	ENSG00000289405	-	474.244	0.820263	0.173503	4.72765	2.27131e-06	8.04744e-05
chr7	92112159	92179511	ENSG00000285772	-	11621.2	0.821987	0.140998	5.82977	5.55035e-09	3.55544e-07
chr7	92084987	92134803	CYP51A1	-	11791.3	0.822289	0.140726	5.8432	5.12089e-09	3.30428e-07
chr22	23862188	23895223	ENSG00000251357	+	23071.2	0.822333	0.125167	6.56986	5.03629e-11	4.53251e-09
chr22	47630827	48023004	EPIC1	+	1876.12	0.8243	0.211293	3.90122	9.57086e-05	0.00189913
chr6	159669069	159762529	SOD2	-	6227.34	0.824925	0.155798	5.29483	1.19124e-07	5.81838e-06
chr10	36521721	36524234	NAMPTP1	-	136.698	0.826696	0.228802	3.61315	0.000302503	0.00490665
chr15	40952962	40956512	CHAC1	+	189.766	0.826971	0.28219	2.93055	0.0033836	0.0318135
chr2	200586014	200677064	AOX1	+	69.0521	0.82818	0.292087	2.83539	0.00457699	0.0397843
chr17	82458180	82490537	NARF	+	2925.26	0.829117	0.11723	7.0726	1.52062e-12	1.69085e-10
chr9	136945185	136946975	C8G	+	101.162	0.830246	0.247823	3.35016	0.000807643	0.010672
chr9	97501180	97601743	TMOD1	+	332.995	0.831247	0.200502	4.14582	3.38593e-05	0.000807524
chr6	159762045	159779112	ACAT2	+	9074.28	0.831806	0.153181	5.43023	5.62828e-08	2.94403e-06
chr5	181195496	181203103	TRIM7-AS1	+	51.2091	0.832281	0.294323	2.82778	0.0046872	0.040444
chr4	185363872	185395924	LRP2BP	-	116.019	0.832783	0.258652	3.21971	0.00128319	0.0152466
chr6	139371807	139374648	CITED2	-	2745.62	0.834045	0.137153	6.08114	1.19332e-09	8.50718e-08
chr5	109237120	109326369	ENSG00000249476	-	73.3093	0.834205	0.285602	2.92087	0.00349057	0.0325835
chr17	7834217	7854796	KDM6B	+	273.298	0.836269	0.198699	4.20871	2.56828e-05	0.000642048
chr21	26917922	26967088	ADAMTS5	-	396.323	0.836639	0.155245	5.38915	7.07911e-08	3.59652e-06
chr7	27193503	27200091	HOXA13	-	213.82	0.837224	0.204284	4.09834	4.16123e-05	0.000962966
chr14	75649791	75660876	ERG28	-	1395.19	0.837285	0.158395	5.28605	1.24987e-07	6.03762e-06
chrX	135037281	135040355	ENSG00000286964	+	68.5946	0.840531	0.278585	3.01714	0.00255171	0.0256331
chr3	156809551	156810732	PA2G4P4	-	75.2147	0.840981	0.267699	3.14152	0.00168075	0.0188442
chr8	133454848	133571940	ST3GAL1	-	91.826	0.84167	0.2459	3.42282	0.000619753	0.00869621
chr4	173369969	173377532	SAP30	+	1381.97	0.842965	0.14128	5.96662	2.42222e-09	1.65347e-07
chr6	143940300	144064599	PLAGL1	-	2108.72	0.844266	0.178322	4.73451	2.19585e-06	7.82714e-05
chr14	70808811	70816935	MAP3K9-DT	+	52.653	0.844379	0.302582	2.79058	0.00526136	0.0437128
chr11	65354751	65357613	TIGD3	+	76.1521	0.844747	0.251295	3.36158	0.000774981	0.0103175
chr17	8220624	8224043	LINC00324	-	147.864	0.847089	0.232335	3.64598	0.000266378	0.00441384
chr5	38845858	38945596	OSMR	+	5979.97	0.847247	0.165687	5.11354	3.16179e-07	1.40807e-05
chr2	38121935	38123881	ENSG00000280276	-	82.4191	0.847737	0.268982	3.15165	0.00162352	0.0183646
chr2	38132637	38138946	ENSG00000229160	-	74.1844	0.848631	0.272439	3.11495	0.00183979	0.0201354
chr22	23894383	23895227	MIF	+	22310.4	0.848965	0.126854	6.69244	2.19485e-11	2.08629e-09
chr7	140177184	140179640	KDM7A-DT	+	52.4699	0.849666	0.293057	2.89932	0.00373971	0.0342403
chr9	2421597	2622457	VLDLR-AS1	-	458.096	0.850188	0.231033	3.67994	0.000233288	0.00394693
chr16	2209253	2210905	BRICD5	-	177.324	0.851642	0.220672	3.85931	0.000113707	0.00218041
chr19	45333434	45351520	KLC3	+	59.7918	0.85288	0.282749	3.01638	0.00255809	0.0256826
chr9	136799223	136810042	ENSG00000273066	+	487.129	0.85368	0.152018	5.61567	1.95806e-08	1.13876e-06
chr21	41175231	41186788	PLAC4	-	2719.68	0.853855	0.148324	5.75668	8.57837e-09	5.34201e-07
chr3	183635610	183684519	KLHL24	+	2499.05	0.854128	0.115354	7.40438	1.31764e-13	1.7385e-11
chr8	22713251	23000000	PEBP4	-	52.379	0.855612	0.308328	2.775	0.00552011	0.045246
chr15	90160604	90229679	SEMA4B	+	1800.61	0.857028	0.141273	6.06648	1.30741e-09	9.28312e-08
chr19	4448810	4450836	ENSG00000280239	+	224.324	0.858547	0.2116	4.05741	4.96201e-05	0.00110908
chr3	101827991	101861022	NFKBIZ	+	871.738	0.860807	0.162526	5.29642	1.18093e-07	5.79968e-06
chr15	40323692	40326715	INAFM2	+	59.1325	0.86127	0.274075	3.14246	0.00167536	0.0188065
chr15	84817356	84873479	ALPK3	+	61.4181	0.862142	0.28685	3.00555	0.00265098	0.0263989
chr13	109269634	109278512	ENSG00000275216	+	498.846	0.862678	0.162319	5.31473	1.06818e-07	5.3049e-06
chr1	150794880	150809577	CTSK	-	84.104	0.862857	0.253943	3.39784	0.000679211	0.00932333
chr7	23235967	23275108	GPNMB	+	1060.27	0.863207	0.158095	5.46003	4.76045e-08	2.54157e-06
chr2	219279342	219286898	DNAJB2	+	1012.98	0.866211	0.186652	4.64078	3.47104e-06	0.000116596
chr21	44885953	44931989	ITGB2	-	124.747	0.86628	0.235895	3.67231	0.000240371	0.00405125
chr18	46803218	46920160	PIAS2	-	3312.6	0.867802	0.166615	5.20841	1.90461e-07	8.83818e-06
chr14	74476192	74494177	NPC2	-	2248.76	0.868219	0.139243	6.23527	4.50992e-10	3.41851e-08
chrX	39991276	40012662	ENSG00000289570	-	164.606	0.86905	0.217812	3.98991	6.60993e-05	0.00139622
chr11	122655722	122814473	UBASH3B	+	2139.97	0.869783	0.1281	6.78985	1.12247e-11	1.09643e-09
chr14	104724229	104747325	ADSS1	+	330.439	0.870293	0.193159	4.50558	6.61929e-06	0.000204239
chr9	137077517	137084539	UAP1L1	+	837.445	0.871503	0.140929	6.18397	6.25077e-10	4.624e-08
chr17	28703197	28711888	PROCA1	-	169.534	0.873266	0.221545	3.9417	8.09058e-05	0.00165327
chr13	99973526	99980034	ENSG00000288060	-	44.305	0.874549	0.312242	2.80087	0.00509655	0.042725
chr17	69147214	69244846	ABCA10	-	152.333	0.87466	0.267388	3.27113	0.00107118	0.0133841
chr12	80099537	80380880	OTOGL	+	63.8275	0.882259	0.310263	2.84359	0.00446089	0.0389859
chr2	237574322	237601614	RAB17	-	1833.4	0.885363	0.11261	7.86223	3.77345e-15	6.17727e-13
chr17	82453181	82458521	NARF-AS2	-	65.3657	0.886333	0.266887	3.32101	0.000896926	0.011618
chr9	7177577	7203458	ENSG00000285688	+	48.7317	0.886797	0.307649	2.88249	0.00394541	0.0355603
chr3	196319342	196338503	TM4SF19	-	74.3175	0.88696	0.301723	2.93965	0.00328581	0.030983
chrX	15319452	15335554	PIGA	-	2475.79	0.887697	0.163358	5.43405	5.50886e-08	2.89871e-06
chr6	137823673	137868233	WAKMAR2	-	105.015	0.88896	0.221836	4.00728	6.14225e-05	0.0013163
chr19	41397808	41425002	BCKDHA	+	2887.77	0.889094	0.153992	5.77362	7.75862e-09	4.89901e-07
chr16	589357	629272	RAB40C	+	2199.99	0.890468	0.157862	5.64079	1.69268e-08	9.90944e-07
chr6	89080751	89085160	PNRC1	+	2144.74	0.89325	0.148741	6.00542	1.90837e-09	1.32835e-07
chr1	15236521	15400283	FHAD1	+	204.776	0.893431	0.173443	5.15115	2.5889e-07	1.17665e-05
chr19	10271093	10286615	ICAM1	+	1757.95	0.893917	0.170117	5.25472	1.48246e-07	7.08375e-06
chr3	88059255	88144660	ZNF654	+	2334.58	0.894797	0.136287	6.56551	5.18536e-11	4.63016e-09
chrX	134796395	134854835	PABIR3	+	1006.38	0.895888	0.174841	5.12401	2.99107e-07	1.34219e-05
chr17	7036015	7040117	SLC16A13	+	133.486	0.897043	0.255527	3.51056	0.000447164	0.00676293
chr7	29650227	29742594	DPY19L2P3	+	60.3875	0.897372	0.277832	3.2299	0.00123831	0.0148623
chr12	49064676	49070025	RHEBL1	-	173.99	0.897822	0.205911	4.36024	1.29919e-05	0.000364019
chr2	11677595	11827409	LPIN1	+	4180.64	0.898702	0.124323	7.22876	4.87423e-13	5.9432e-11
chr17	41866917	41930542	ACLY	-	38365.3	0.899175	0.144484	6.22336	4.86608e-10	3.66095e-08
chr9	129476946	129513687	LINC00963	+	2866.95	0.899794	0.134284	6.70069	2.07443e-11	1.98248e-09
chr5	149551947	149634968	ARHGEF37	+	607.928	0.901456	0.171974	5.24181	1.59011e-07	7.51686e-06
chr2	101345550	101387503	CREG2	-	1679.4	0.903557	0.157762	5.72734	1.02019e-08	6.24114e-07
chr11	9754770	9759533	LINC02709	-	71.8511	0.903607	0.284465	3.17651	0.00149057	0.0172469
chr12	131894622	131923150	ULK1	+	2855.08	0.907834	0.167699	5.41347	6.18147e-08	3.18876e-06
chr1	155308748	155320666	FDPS	+	23804.4	0.908067	0.145564	6.23829	4.42388e-10	3.3713e-08
chr19	2096429	2099593	IZUMO4	+	53.805	0.908811	0.313036	2.90321	0.00369358	0.0339234
chr5	1008802	1038943	NKD2	+	627.211	0.909443	0.136078	6.68324	2.33716e-11	2.19793e-09
chr8	17801345	17861069	MTUS1-DT	+	200.423	0.909804	0.200579	4.53589	5.73622e-06	0.000182403
chr2	38203363	38239590	ENSG00000227292	-	248.856	0.913004	0.192345	4.74671	2.06756e-06	7.42976e-05
chr10	104353833	104455102	CFAP58	+	118.476	0.915275	0.266273	3.43735	0.000587428	0.00833525
chr8	22114419	22133384	HR	-	200.348	0.916983	0.237183	3.86614	0.000110571	0.00213185
chr19	11089462	11133820	LDLR	+	9309.86	0.924613	0.131055	7.05517	1.72392e-12	1.88142e-10
chr5	24487100	24644978	CDH10	-	5502.03	0.925083	0.161396	5.73176	9.93952e-09	6.14443e-07
chr4	185143266	185150382	SLC25A4	+	2928.15	0.925576	0.158617	5.8353	5.36948e-09	3.45209e-07
chr6	31857659	31862905	NEU1	-	1782.3	0.927964	0.194108	4.78065	1.74729e-06	6.5036e-05
chr1	11934205	11975538	PLOD1	+	6606.62	0.929608	0.162293	5.72796	1.01646e-08	6.24037e-07
chr3	149384179	149385800	ENSG00000243885	-	46.5116	0.930954	0.326912	2.84772	0.00440336	0.03879
chr6	7540447	7543114	DSP-AS1	-	110.215	0.931278	0.238473	3.90518	9.4156e-05	0.00187887
chr11	102317450	102339403	BIRC3	+	766.48	0.932164	0.137057	6.80128	1.03693e-11	1.02419e-09
chr22	27748277	27801756	MN1	-	2189.97	0.932302	0.148499	6.27815	3.42619e-10	2.70529e-08
chrX	19360056	19515508	MAP3K15	-	699.356	0.932509	0.160742	5.80128	6.58101e-09	4.17033e-07
chr8	22599599	22604150	C8orf58	+	409.461	0.932528	0.147383	6.32723	2.49608e-10	2.03367e-08
chr5	6686325	6707711	LINC02102	-	102.664	0.934465	0.251621	3.71379	0.000204181	0.00357024
chr8	124998497	125022283	SQLE	+	6840.35	0.934905	0.149728	6.24402	4.26452e-10	3.29087e-08
chr10	72059034	72089032	SPOCK2	-	284.012	0.935167	0.194428	4.80983	1.51059e-06	5.70668e-05
chr4	88709298	88730103	FAM13A-AS1	+	115.535	0.936901	0.288265	3.25013	0.00115351	0.014049
chr12	92140278	92145846	BTG1	-	1927.04	0.937711	0.187977	4.98843	6.08717e-07	2.55187e-05
chr15	55408495	55418798	PIERCE2	+	97.3747	0.939008	0.255963	3.66853	0.000243953	0.00410379
chr15	22664359	22686213	WHAMMP3	+	123.768	0.939397	0.235162	3.99467	6.47842e-05	0.00137172
chr10	102869470	102901899	AS3MT	+	55.4857	0.939508	0.302254	3.10834	0.00188139	0.0205074
chr22	24417879	24442357	ADORA2A	+	246.72	0.941555	0.197116	4.77665	1.7824e-06	6.59267e-05
chr10	73253762	73358864	CFAP70	-	169.286	0.946324	0.226955	4.16966	3.05053e-05	0.000744936
chr1	15409888	15430339	EFHD2	+	3098.94	0.947407	0.108438	8.73689	2.39625e-18	5.53306e-16
chr12	131924736	131929351	ENSG00000255992	-	84.0159	0.947712	0.242593	3.90659	9.36094e-05	0.00187007
chr11	73405297	73410682	ENSG00000256448	+	64.2579	0.9495	0.303003	3.13363	0.00172656	0.019259
chr3	146069440	146163653	PLOD2	-	13681.9	0.951603	0.16797	5.66531	1.46755e-08	8.70684e-07
chr20	46364551	46397994	ENSG00000273828	+	59.5564	0.952494	0.278575	3.41916	0.000628144	0.00878606
chr1	40161387	40240921	RLF	+	4173.61	0.954201	0.125158	7.62397	2.45999e-14	3.65485e-12
chr19	18868545	18896158	GDF1	-	60.1357	0.954284	0.291809	3.27024	0.00107457	0.0134169
chr11	65866441	65873592	EFEMP2	-	44.5353	0.954832	0.341222	2.79827	0.00513771	0.0429222
chr15	75647912	75662301	SNX33	+	1820.4	0.955272	0.160591	5.94848	2.70638e-09	1.82629e-07
chr20	62596732	62603355	LINC02970	-	68.0426	0.955542	0.327226	2.92013	0.00349883	0.0325857
chr16	84294846	84329844	WFDC1	+	2060.03	0.958179	0.123236	7.77517	7.5344e-15	1.18936e-12
chr3	149377778	149386583	TM4SF1-AS1	+	124.725	0.95945	0.224304	4.27745	1.89045e-05	0.000499523
chr22	37805229	37807432	H1-0	+	1400.82	0.961759	0.179999	5.34313	9.13576e-08	4.54987e-06
chr4	76251721	76311129	FAM47E-STBD1	+	468.541	0.963414	0.176463	5.45958	4.77263e-08	2.54157e-06
chr2	177612999	177618742	TTC30A	-	158.297	0.964223	0.247968	3.8885	0.000100864	0.00199017
chr19	18207961	18255419	ENSG00000285188	-	80.3413	0.965613	0.26917	3.58737	0.000334032	0.00529658
chr19	18207965	18248200	PDE4C	-	80.3413	0.965613	0.26917	3.58737	0.000334032	0.00529658
chr19	18868545	18896727	CERS1	-	60.4766	0.966523	0.291279	3.3182	0.000905992	0.011709
chr7	1428465	1459470	MICALL2	-	740.279	0.967054	0.184301	5.24713	1.54485e-07	7.36197e-06
chr1	42925353	42958893	SLC2A1	-	18136.1	0.967791	0.134282	7.20718	5.71216e-13	6.82372e-11
chr19	676392	683392	FSTL3	+	21245	0.967814	0.149316	6.48163	9.07354e-11	7.86374e-09
chr7	155295918	155297541	INSIG1-DT	-	93.8893	0.969125	0.248746	3.89604	9.7779e-05	0.00193371
chr8	33547754	33567128	RNF122	-	186.935	0.969189	0.197595	4.90492	9.34639e-07	3.73012e-05
chr2	232378724	232382889	ALPP	+	2722.32	0.970209	0.175779	5.5195	3.39969e-08	1.86666e-06
chr7	20328289	20331781	ITGB8-AS1	-	43.4799	0.971541	0.323042	3.00747	0.0026343	0.0262539
chr1	161403409	161470523	ENSG00000283360	-	145.496	0.972819	0.240468	4.04553	5.22059e-05	0.0011552
chr4	76306733	76311130	STBD1	+	463.011	0.973617	0.177269	5.49231	3.96718e-08	2.15153e-06
chr6	41026895	41039221	UNC5CL	-	77.3982	0.97378	0.251618	3.87008	0.0001088	0.00210099
chr4	184755595	184826818	ACSL1	-	1089.26	0.975332	0.171126	5.69949	1.20164e-08	7.2017e-07
chr8	102805517	102810039	GASAL1	+	133.068	0.97807	0.261323	3.74276	0.000182009	0.00326362
chr19	12791486	12793315	JUNB	+	2434.85	0.978421	0.178019	5.49616	3.88153e-08	2.11155e-06
chr2	200853009	200864691	CLK1	-	3155.57	0.978653	0.149603	6.54166	6.08409e-11	5.40536e-09
chr2	113157325	113209396	PSD4	+	49.0195	0.979487	0.33592	2.91583	0.00354744	0.0329406
chr8	28348287	28490278	FBXO16	-	1338.3	0.980838	0.147226	6.6621	2.69934e-11	2.52509e-09
chr3	194685883	194689037	FAM43A	+	111.093	0.981466	0.236548	4.14912	3.33752e-05	0.000798475
chr19	1392170	1396467	ENSG00000248015	-	57.1046	0.98226	0.304169	3.22933	0.00124082	0.014873
chr18	3653030	3656282	ENSG00000266401	+	55.0351	0.983085	0.315251	3.11842	0.00181825	0.0200166
chr15	100861843	100874369	ENSG00000259604	+	506.917	0.985983	0.152586	6.46183	1.03447e-10	8.92168e-09
chr12	12891559	12917937	GPRC5A	+	8750.46	0.986301	0.174053	5.66668	1.45589e-08	8.66674e-07
chr3	48564073	48595329	COL7A1	-	1604.48	0.987592	0.217175	4.54744	5.43021e-06	0.00017424
chr11	75422394	75433203	KLHL35	-	612.636	0.990072	0.141439	7	2.55956e-12	2.72608e-10
chr17	38671703	38674957	EPOP	-	1312.09	0.991183	0.123723	8.01131	1.13492e-15	1.9672e-13
chr15	40087890	40108892	BMF	-	134.264	0.991309	0.224239	4.42078	9.83466e-06	0.000286453
chr19	4447304	4448217	ENSG00000267030	+	81.8505	0.993605	0.284908	3.48746	0.000487639	0.00719055
chr3	143971823	144048719	DIPK2A	+	1687.38	0.993638	0.161189	6.16444	7.07336e-10	5.21071e-08
chr12	57516588	57521737	DDIT3	-	979.297	0.994842	0.205157	4.84918	1.23972e-06	4.82781e-05
chr11	111768668	111778364	ENSG00000254990	-	52.8115	0.996795	0.306075	3.2567	0.00112714	0.0138643
chr8	23135588	23164027	TNFRSF10D	-	323.332	0.997986	0.162118	6.15591	7.46467e-10	5.47615e-08
chr15	74890005	74902219	MPI	+	1620.8	0.998373	0.168312	5.93167	2.99877e-09	2.00069e-07
chr1	42952202	42952641	ATP6V0CP4	-	35.9476	1.00223	0.361002	2.77623	0.0054993	0.0451265
chr17	18172625	18184753	ENSG00000266677	-	32.3004	1.00309	0.365409	2.74512	0.00604886	0.0481946
chr7	1530702	1543043	MAFK	+	2914.27	1.0032	0.164487	6.09896	1.06759e-09	7.6417e-08
chr17	81528377	81537130	FSCN2	+	125.438	1.00624	0.26354	3.81818	0.000134438	0.00250915
chr8	119416446	119424434	CCN3	+	278.019	1.00909	0.245424	4.11161	3.92902e-05	0.000920067
chr20	44656451	44696096	ENSG00000132832	-	235.262	1.01245	0.193015	5.24547	1.55881e-07	7.40852e-06
chr10	30655489	30717266	SVIL2P	+	37.8024	1.01356	0.361644	2.80264	0.00506865	0.0425903
chr6	113969701	114471705	HDAC2-AS2	+	118.166	1.0136	0.261691	3.87328	0.00010738	0.00208624
chr19	781002	782651	ENSG00000272473	-	104.669	1.01511	0.224468	4.52228	6.11767e-06	0.000191096
chr6	26195554	26196633	H1-12P	+	35.6882	1.01718	0.360118	2.82458	0.00473425	0.0406911
chr10	26438341	26567803	APBB1IP	+	49.8831	1.0194	0.332553	3.06537	0.002174	0.0226861
chrX	134887632	134915257	MOSPD1	-	4853.89	1.0197	0.180217	5.6582	1.52972e-08	9.0453e-07
chr17	68267026	68291267	SLC16A6	-	1805.23	1.02156	0.172003	5.93918	2.8645e-09	1.91835e-07
chr1	161433444	161440996	ENSG00000283317	-	87.27	1.02239	0.276122	3.70266	0.000213347	0.00369801
chr4	171812254	173041559	GALNTL6	+	175.832	1.02346	0.211569	4.83747	1.31499e-06	5.03226e-05
chr13	112894378	113099742	MCF2L	+	49.4294	1.02421	0.314723	3.25431	0.00113667	0.0139059
chr3	134313498	134327944	LINC02004	+	185.837	1.02554	0.189431	5.41381	6.16969e-08	3.18876e-06
chr16	88874858	88977207	CBFA2T3	-	580.831	1.0292	0.18711	5.50054	3.78627e-08	2.06609e-06
chr12	6534512	6538374	GAPDH	+	163024	1.03125	0.161733	6.37627	1.81448e-10	1.51321e-08
chr16	15726674	15732993	ENSG00000263335	+	33.7302	1.03187	0.365115	2.82616	0.00471095	0.0405849
chr15	39770559	39801333	ENSG00000259580	-	264.769	1.03645	0.164613	6.29629	3.04856e-10	2.45475e-08
chr16	88936779	88939651	ENSG00000261226	-	83.8822	1.03908	0.277886	3.73923	0.000184585	0.00329975
chr16	3065297	3082192	IL32	+	82.2812	1.04362	0.353623	2.95124	0.00316503	0.0301496
chr3	7951263	8611924	LMCD1-AS1	-	71.9748	1.04646	0.353111	2.96356	0.00304106	0.0292842
chr1	228650241	228651379	DUSP5P1	+	44.2453	1.05328	0.326231	3.22863	0.00124385	0.0148891
chr19	15107401	15114985	SYDE1	+	2467.98	1.05381	0.162473	6.48605	8.81176e-11	7.71247e-09
chr12	69825227	69959097	MYRFL	+	60.9615	1.05518	0.360142	2.92989	0.00339087	0.0318378
chr11	73963657	73970287	ENSG00000255847	-	37.8673	1.05701	0.355492	2.97337	0.00294546	0.0285973
chr7	138594285	138701362	SVOPL	-	5348.65	1.05758	0.134535	7.86104	3.80967e-15	6.17936e-13
chr9	133376366	133406096	STKLD1	+	30.6695	1.05777	0.369987	2.85892	0.0042508	0.0376147
chr19	4454014	4455286	ENSG00000267769	+	46.0488	1.05915	0.318751	3.32283	0.000891093	0.0115626
chr3	187721377	187745725	BCL6	-	1315.19	1.06592	0.159385	6.68767	2.26744e-11	2.14377e-09
chr9	98807670	98850081	GALNT12	+	30.1431	1.06621	0.379595	2.80882	0.00497242	0.0420432
chr2	120346136	120351803	INHBB	+	186.997	1.0681	0.190619	5.60331	2.10299e-08	1.21506e-06
chr16	88651935	88663161	MVD	-	3913.67	1.07391	0.147892	7.26144	3.82985e-13	4.7022e-11
chr4	158315311	158653372	RXFP1	+	62.0426	1.07424	0.28284	3.79804	0.000145844	0.00268317
chr7	155203671	155217134	ENSG00000287865	+	60.6289	1.07464	0.281485	3.81775	0.000134677	0.00250915
chr12	124776856	124882668	SCARB1	-	8564.18	1.07616	0.154358	6.97184	3.12824e-12	3.27262e-10
chr12	102304355	102463491	LINC02456	+	76.3275	1.0776	0.311741	3.45673	0.000546764	0.00784006
chr2	74723873	74778780	ENSG00000287687	-	42.3736	1.08134	0.354862	3.04721	0.00230978	0.0236462
chr3	146066344	146069185	LNCSRLR	-	176.411	1.08163	0.225515	4.79625	1.61666e-06	6.05563e-05
chr10	101007679	101032295	PDZD7	-	68.0303	1.08311	0.353138	3.0671	0.00216147	0.0226257
chr15	45448427	45513767	ENSG00000259354	+	74.2294	1.08386	0.264576	4.09659	4.19277e-05	0.000968995
chr1	16014028	16019594	HSPB7	-	2233.49	1.08387	0.153152	7.07708	1.47226e-12	1.65794e-10
chr19	10572671	10587315	AP1M2	-	1797.33	1.08441	0.164551	6.59015	4.39389e-11	3.9838e-09
chr8	28345590	28402701	ZNF395	-	2052.24	1.08477	0.145645	7.44805	9.47276e-14	1.27846e-11
chr19	5558167	5578349	TINCR	-	760.801	1.08537	0.196171	5.53279	3.1518e-08	1.74137e-06
chr10	1039152	1049119	IDI1	-	11703.9	1.08574	0.131073	8.28349	1.19612e-16	2.3239e-14
chr19	2071036	2096673	MOB3A	-	744.124	1.08813	0.180928	6.01416	1.80822e-09	1.26361e-07
chrX	39787132	39788136	GAPDHP1	-	216.011	1.08842	0.22546	4.82755	1.38221e-06	5.26671e-05
chr11	61959718	61967634	FTH1	-	19365.8	1.09477	0.154766	7.0737	1.50861e-12	1.68812e-10
chr6	30876421	30900156	DDR1	+	8207.43	1.09845	0.154373	7.11555	1.11465e-12	1.28563e-10
chr9	22646200	22824213	LINC01239	+	48.8274	1.10277	0.329007	3.35181	0.00080285	0.0106325
chr11	33698261	33700826	C11orf91	-	42.0665	1.1033	0.340831	3.23708	0.00120761	0.0145737
chr19	48872421	48876058	PPP1R15A	+	1033.07	1.10343	0.169968	6.49201	8.46972e-11	7.44998e-09
chr19	45001461	45038192	RELB	+	1089.94	1.10518	0.186593	5.92296	3.16194e-09	2.09375e-07
chr15	59995648	60004054	ENSG00000289162	-	108.947	1.10861	0.220121	5.03636	4.74466e-07	2.02134e-05
chr1	43525187	43623666	PTPRF	+	5640.53	1.11112	0.164866	6.73953	1.58905e-11	1.53521e-09
chr17	79018131	79027673	C1QTNF1-AS1	-	57.9849	1.113	0.338885	3.28429	0.00102241	0.0129023
chr11	72223701	72239147	INPPL1	+	13393.1	1.1136	0.124308	8.95834	3.29612e-19	8.69783e-17
chr19	43192702	43207299	PSG4	-	38.4756	1.11863	0.355953	3.14263	0.00167435	0.0188065
chr15	90083045	90102477	IDH2	-	2228.15	1.11887	0.14138	7.91394	2.49364e-15	4.15921e-13
chr21	46188141	46228824	LSS	-	11441.5	1.11896	0.123858	9.03424	1.65145e-19	4.70928e-17
chr6	30798211	30830659	LINC00243	-	128.804	1.12057	0.235778	4.75266	2.00762e-06	7.27575e-05
chr22	42692121	42721298	A4GALT	-	577.094	1.12129	0.155307	7.21979	5.20667e-13	6.26217e-11
chr19	4969113	5153598	KDM4B	+	3901.24	1.12248	0.12409	9.04566	1.48763e-19	4.31169e-17
chr19	10111693	10115372	P2RY11	+	835.294	1.1226	0.165078	6.80044	1.043e-11	1.02446e-09
chr16	86566829	86569728	FOXC2	+	259.088	1.12389	0.180934	6.2116	5.24482e-10	3.92917e-08
chr19	55181247	55209506	PTPRH	-	882.043	1.12421	0.386073	2.91192	0.00359214	0.0332161
chr8	17808361	17822183	ENSG00000253671	+	94.6638	1.12551	0.267617	4.20567	2.60308e-05	0.000646383
chr10	38356380	38378505	HSD17B7P2	+	178.026	1.12656	0.184135	6.11812	9.46869e-10	6.83291e-08
chr2	127638381	127681786	LIMS2	-	158.236	1.13014	0.203483	5.55397	2.79257e-08	1.5575e-06
chr9	98943179	99070792	COL15A1	+	2367.26	1.13324	0.177046	6.40083	1.54534e-10	1.30103e-08
chr6	11183298	11382348	NEDD9	-	4472.41	1.13439	0.170649	6.64751	2.98096e-11	2.75934e-09
chr11	71428193	71452868	DHCR7	-	4324.79	1.13552	0.161904	7.01355	2.32347e-12	2.48963e-10
chr12	12915829	12915918	MIR614	+	59.9845	1.13762	0.301655	3.77127	0.000162417	0.00295425
chr1	162790702	162812823	HSD17B7	+	965.873	1.13914	0.131966	8.63209	6.02426e-18	1.31492e-15
chr7	20330702	20415754	ITGB8	+	2386.54	1.13986	0.126683	8.99775	2.30392e-19	6.34035e-17
chr12	7954216	7972759	ENSG00000288043	+	81.0656	1.14	0.278643	4.09126	4.29033e-05	0.000986386
chr7	112819147	112939875	BMT2	-	757.399	1.1424	0.155569	7.34341	2.08222e-13	2.66765e-11
chr11	66975277	66977009	C11orf86	+	1310.42	1.14415	0.204952	5.58251	2.37072e-08	1.35207e-06
chr8	144266453	144268481	SCX	+	39.1606	1.14467	0.351204	3.25927	0.00111701	0.0137718
chr8	11797928	11802568	ENSG00000255046	-	31.5031	1.1448	0.37498	3.05297	0.00226587	0.0233862
chr2	70124034	70132923	LINC01816	-	63.6333	1.1455	0.280091	4.08974	4.31856e-05	0.000990301
chr4	183097017	183099199	WWC2-AS2	-	42.7776	1.14777	0.343088	3.3454	0.000821641	0.0108327
chr4	24321454	24323679	ENSG00000289902	+	135.623	1.15084	0.252897	4.55063	5.34851e-06	0.00017193
chr22	49933197	49935277	ENSG00000278869	-	139.421	1.15121	0.229269	5.0212	5.13498e-07	2.17192e-05
chr10	13099449	13138308	OPTN	+	1096.95	1.15195	0.160263	7.1879	6.57959e-13	7.8072e-11
chr8	22106874	22109419	NUDT18	-	184.818	1.15643	0.228511	5.06072	4.17683e-07	1.79239e-05
chr7	44064908	44066079	ENSG00000239775	+	99.4876	1.15698	0.267281	4.32871	1.49983e-05	0.000412395
chr14	52639915	52695900	ERO1A	-	7128.41	1.15729	0.180494	6.4118	1.43812e-10	1.21655e-08
chr11	59669312	59676041	PATL1-DT	+	61.5503	1.15836	0.272212	4.25535	2.08723e-05	0.000539507
chr19	45467995	45475179	FOSB	+	33.4156	1.15907	0.420184	2.75849	0.00580683	0.0466779
chr9	136848770	136849648	ENSG00000288873	-	116.926	1.16046	0.214361	5.41356	6.17852e-08	3.18876e-06
chr6	87151803	87265943	ZNF292	+	4366.13	1.16176	0.144036	8.06578	7.27706e-16	1.28943e-13
chr7	2631986	2664802	TTYH3	+	552.505	1.16296	0.190655	6.0998	1.06199e-09	7.63254e-08
chr11	47437764	47449143	RAPSN	-	71.5569	1.16363	0.263128	4.42229	9.76607e-06	0.000284924
chr12	57797376	57818734	AVIL	-	69.5794	1.16661	0.275891	4.22851	2.35244e-05	0.000600161
chr16	30092314	30096915	YPEL3	-	139.933	1.16806	0.210165	5.55783	2.73152e-08	1.52827e-06
chr4	165327667	165343164	MSMO1	+	4821.18	1.17018	0.153602	7.6183	2.57038e-14	3.78703e-12
chr1	20589086	20618903	CDA	+	869.165	1.17367	0.205152	5.72096	1.05923e-08	6.45765e-07
chr17	82244770	82245591	ENSG00000275888	+	50.859	1.17383	0.318315	3.68763	0.00022635	0.00386281
chr15	90074512	90082207	ZNF710-AS1	-	47.8981	1.17511	0.341973	3.43627	0.000589791	0.00836207
chr16	28239693	28240668	GAPDHP35	-	520.379	1.17673	0.173652	6.77637	1.23236e-11	1.19715e-09
chr11	6319127	6360454	ENSG00000282556	+	252.962	1.17693	0.187315	6.28315	3.31777e-10	2.64226e-08
chr14	73537143	73543796	ACOT1	+	95.6374	1.17866	0.245482	4.80142	1.57546e-06	5.92642e-05
chr10	100373099	100454043	OLMALINC	+	411.51	1.18175	0.247731	4.7703	1.83954e-06	6.74751e-05
chr1	231363797	231528603	ENSG00000287856	-	6752.63	1.1842	0.13665	8.66593	4.47842e-18	1.01511e-15
chr21	44994362	44995185	LINC00165	-	45.4439	1.18517	0.314736	3.76558	0.00016616	0.00300994
chr16	73092349	73099337	HCCAT5	+	33.6133	1.18818	0.387106	3.0694	0.00214487	0.0224974
chr8	124271667	124279580	ENSG00000253227	+	40.6302	1.18851	0.344337	3.45159	0.000557299	0.00796071
chr3	177816865	177899224	LINC02015	+	27.6644	1.18878	0.401832	2.95841	0.00309231	0.0296165
chr2	74715269	74805979	ENSG00000286739	+	41.7129	1.19114	0.383253	3.10797	0.00188376	0.0205206
chr19	34359480	34402413	GPI	+	48034.2	1.1934	0.147969	8.06517	7.31324e-16	1.28943e-13
chr3	194296191	194322871	LINC00887	-	318.108	1.19471	0.19976	5.98076	2.22105e-09	1.52202e-07
chr3	146059585	146061679	ENSG00000261051	-	107.444	1.19497	0.263692	4.53169	5.85124e-06	0.000185062
chr4	173397770	173409559	ENSG00000288025	+	43.3337	1.19678	0.366335	3.2669	0.0010873	0.01351
chr1	26462756	26468014	DHDDS-AS1	-	55.3055	1.19731	0.313124	3.82374	0.000131444	0.00245919
chr11	33665220	33696701	ENSG00000255202	-	46.9019	1.1992	0.309576	3.8737	0.000107195	0.00208624
chr3	81489703	81761645	GBE1	-	10130.7	1.20124	0.173227	6.93451	4.07619e-12	4.23924e-10
chr1	20482391	20486210	CAMK2N1	-	110.851	1.20276	0.234393	5.13139	2.87617e-07	1.30053e-05
chr15	72199029	72231819	PKM	-	84777.9	1.20576	0.163144	7.3908	1.45944e-13	1.91133e-11
chr17	82217934	82261129	SLC16A3	+	23953.9	1.20796	0.162797	7.42001	1.17109e-13	1.55676e-11
chr16	30053123	30070414	ENSG00000285043	+	49545.3	1.20848	0.159169	7.59242	3.13978e-14	4.55011e-12
chr10	100347233	100364826	SCD	+	46336.1	1.20908	0.193677	6.24274	4.29973e-10	3.29087e-08
chr1	85276388	85448124	BCL10-AS1	+	151.458	1.20929	0.230605	5.244	1.57135e-07	7.44813e-06
chr16	30064164	30070457	ALDOA	+	49380.7	1.20997	0.159484	7.58675	3.28034e-14	4.67713e-12
chr14	50857891	50944483	PYGL	-	2376.96	1.21025	0.171216	7.06858	1.56522e-12	1.72957e-10
chr7	88420167	88756725	ENSG00000233420	+	64.7532	1.21118	0.365209	3.31639	0.000911881	0.0117765
chr1	116111399	116138149	MAB21L3	+	402.348	1.218	0.204459	5.9572	2.56603e-09	1.7449e-07
chr1	202007945	202017183	ELF3	+	4756.64	1.22179	0.407699	2.9968	0.00272832	0.0270191
chr5	177501904	177511274	DOK3	-	220.063	1.22484	0.214628	5.70683	1.15102e-08	6.96917e-07
chr6	137867214	137883314	TNFAIP3	+	1601.08	1.22572	0.134969	9.08152	1.07066e-19	3.20834e-17
chr19	34396315	34409364	ENSG00000266953	+	20321.2	1.22807	0.154974	7.92434	2.29353e-15	3.86186e-13
chr1	231363751	231422287	EGLN1	-	6535.91	1.23011	0.13836	8.89067	6.07392e-19	1.51249e-16
chr12	9067664	9116229	A2M	-	177.781	1.23298	0.200332	6.15469	7.52255e-10	5.49581e-08
chr17	40921430	40975926	ENSG00000234477	+	52.0102	1.23511	0.297131	4.15678	3.22771e-05	0.000779588
chr17	56593699	56595611	NOG	+	221.432	1.23532	0.265411	4.65439	3.24945e-06	0.000109848
chr1	202011370	202015657	ENSG00000249007	+	3534.03	1.23716	0.409676	3.01984	0.00252908	0.0254781
chr3	10164919	10243745	IRAK2	+	274.954	1.23733	0.172367	7.17846	7.05e-13	8.3096e-11
chr20	34704339	34713439	TP53INP2	+	85.1404	1.23945	0.320895	3.86247	0.000112246	0.00216177
chr6	137657998	137763984	LINC03004	+	66.6735	1.24094	0.279139	4.44561	8.76436e-06	0.00025999
chr17	732412	742968	TLCD3A	+	1438.32	1.24111	0.152084	8.16073	3.33019e-16	6.26359e-14
chr17	60083562	60091885	WFDC21P	-	203.072	1.2442	0.231431	5.37612	7.61076e-08	3.85464e-06
chr16	14301389	14331067	MIR193BHG	+	1163.89	1.24476	0.125146	9.94647	2.61282e-23	1.09987e-20
chr17	44076746	44123702	HDAC5	-	2659.25	1.24618	0.132564	9.40054	5.4285e-21	1.81087e-18
chr6	135991936	136225751	ENSG00000237596	-	49.2467	1.2494	0.312207	4.00182	6.28562e-05	0.0013454
chr11	6318946	6320532	CAVIN3	-	1293.87	1.24952	0.177363	7.04495	1.85524e-12	2.01231e-10
chr7	95583499	95596516	PDK4	-	1330.1	1.25191	0.165008	7.58698	3.27445e-14	4.67713e-12
chr9	91409045	91423832	NFIL3	-	1133.85	1.25319	0.199614	6.27809	3.42752e-10	2.70529e-08
chr10	3141632	3167972	PITRM1-AS1	+	42.8937	1.25458	0.359433	3.49044	0.00048222	0.00713443
chr5	102753981	103029730	PAM	+	10194.5	1.25863	0.168549	7.46745	8.17628e-14	1.12059e-11
chr2	218382029	218396894	SLC11A1	+	34.1009	1.26123	0.379971	3.31928	0.000902497	0.0116809
chr7	106372251	106770207	ENSG00000243797	-	39.6186	1.26253	0.352127	3.58543	0.000336518	0.00533121
chr1	212565334	212620777	ATF3	+	1992.65	1.26258	0.194764	6.48261	9.01501e-11	7.8515e-09
chr12	15107783	15348675	RERG	-	137.969	1.26375	0.23807	5.30832	1.10641e-07	5.47936e-06
chr10	123356450	123537767	LINC02641	+	121.255	1.27018	0.266584	4.76467	1.89167e-06	6.89581e-05
chr14	24365673	24379604	NFATC4	+	71.3409	1.2749	0.273584	4.66	3.16209e-06	0.000107305
chrX	135020513	135022542	RTL8B	-	238.292	1.27738	0.202391	6.31143	2.76462e-10	2.24213e-08
chr6	11414636	11515710	ENSG00000242753	+	32.7151	1.28205	0.431222	2.97306	0.0029485	0.0286111
chr19	53066606	53103434	ZNF160	-	1535.74	1.28479	0.131515	9.76921	1.52637e-22	5.86658e-20
chr1	41478775	41484683	EDN2	-	20.8619	1.28555	0.46402	2.77047	0.00559763	0.0456326
chr2	200780495	200812170	BZW1-AS1	-	76.1474	1.28674	0.315197	4.08235	4.45828e-05	0.00101706
chr16	88663298	88687282	SNAI3-AS1	+	745.623	1.2916	0.184155	7.01364	2.32191e-12	2.48963e-10
chr17	81867721	81868552	ENSG00000262413	+	52.4316	1.29173	0.311932	4.14107	3.45691e-05	0.000819278
chr21	42371887	42396091	TMPRSS3	-	1296.49	1.29251	0.14552	8.88202	6.56559e-19	1.61222e-16
chr2	558153	578145	ENSG00000233633	+	54.5152	1.29274	0.298731	4.32745	1.50846e-05	0.000413481
chr6	159760258	159762332	SOD2-OT1	-	92.5869	1.29424	0.249451	5.18835	2.12168e-07	9.76855e-06
chr14	20684177	20698971	ANG	+	122.136	1.2946	0.293262	4.41449	1.01249e-05	0.000292498
chr10	52314281	52318042	DKK1	+	387.65	1.29662	0.202612	6.39952	1.55865e-10	1.30602e-08
chr14	20684587	20700576	ENSG00000259171	+	192.704	1.30035	0.263109	4.94225	7.72253e-07	3.17522e-05
chr20	35615829	35621094	SPAG4	+	170.502	1.30324	0.281198	4.63461	3.57616e-06	0.00011918
chr14	20684560	20701216	RNASE4	+	193.197	1.30553	0.263113	4.96185	6.98257e-07	2.89793e-05
chr4	24457352	24472951	ENSG00000289201	-	23.809	1.30595	0.41925	3.11497	0.00183962	0.0201354
chr8	90791741	90959393	NECAB1	+	19.0697	1.30621	0.475138	2.74911	0.00597565	0.0476919
chr5	136734830	136763409	ENSG00000250284	+	27.7139	1.30787	0.411697	3.17677	0.00148926	0.017243
chr1	76699789	76700538	TPI1P1	+	138.409	1.31132	0.22528	5.82086	5.85467e-09	3.73685e-07
chr6	85449584	85495791	NT5E	+	559.735	1.31279	0.147395	8.90664	5.26016e-19	1.34782e-16
chr20	44714844	44728509	CCN5	+	6180.38	1.31878	0.149997	8.79208	1.46822e-18	3.50786e-16
chr1	155185824	155192916	MUC1	-	147.315	1.32569	0.287626	4.60909	4.04438e-06	0.000132662
chrX	24465244	24550466	PDK3	+	3009.33	1.32649	0.178451	7.43335	1.05881e-13	1.41816e-11
chr15	34378935	34437808	GOLGA8A	-	1608.4	1.3271	0.186524	7.11491	1.11984e-12	1.28563e-10
chr19	925781	975939	ARID3A	+	1270.12	1.33195	0.171382	7.77183	7.73597e-15	1.21037e-12
chr7	106654360	106661158	CCDC71L	-	36.4894	1.33506	0.367938	3.62848	0.000285094	0.0046671
chr11	18693122	18704785	TMEM86A	+	27.7522	1.33965	0.394116	3.39914	0.000675977	0.00929337
chr10	72273919	72276036	DDIT4	+	9084.33	1.34029	0.178929	7.49061	6.85529e-14	9.46886e-12
[truncated: 241 more rows]

## Sheet: EXOK583R_vs_FLAGwt padj005
V1	V2	V3	V4	V6	baseMean	log2FoldChange	lfcSE	stat	pvalue	padj
chrX	48458537	48470260	SLC38A5	-	89.6789	-5.56074	1.59095	-3.49524	0.000473633	0.0147205
chrX	56618391	56624458	ENSG00000230105	+	14.1582	-4.52422	1.29825	-3.48487	0.000492375	0.0150275
chr9	134880810	134887523	FCN2	+	14.305	-4.14041	1.23543	-3.35138	0.000804099	0.0217632
chr12	119171555	119224855	HSPB8	+	15.9004	-4.13882	1.14294	-3.6212	0.00029324	0.0104557
chr17	18744026	18779349	FBXW10	+	19.9754	-3.83264	1.09802	-3.4905	0.000482118	0.0148359
chr10	75094432	75109221	DUSP13	-	15.8294	-3.3647	1.05846	-3.17887	0.00147853	0.0330594
chr11	126543947	126610948	KIRREL3-AS1	+	19.5352	-2.91545	0.959848	-3.0374	0.00238625	0.0458413
chr19	48837097	48868617	PLEKHA4	-	71.2648	-2.56953	0.520725	-4.93452	8.03465e-07	8.74759e-05
chr5	91642643	91799234	ENSG00000286121	+	60.9483	-2.5459	0.583963	-4.35969	1.30244e-05	0.000956218
chr1	17755333	17827063	ACTL8	+	507.779	-2.51167	0.297444	-8.44418	3.06188e-17	2.59536e-14
chr1	11637018	11655785	FBXO2	-	50.0174	-2.50908	0.614661	-4.08206	4.46391e-05	0.00257718
chr18	50795120	50825402	MRO	-	97.3571	-2.48276	0.456741	-5.43582	5.45454e-08	8.76865e-06
chr21	41304212	41357727	FAM3B	+	65.2141	-2.47157	0.522752	-4.72799	2.26754e-06	0.00021574
chr1	31576485	31587686	TINAGL1	+	39.9784	-2.34599	0.670281	-3.50001	0.000465235	0.0145855
chr12	102304355	102463491	LINC02456	+	117.466	-2.2643	0.448257	-5.05135	4.38701e-07	5.38217e-05
chr19	39306566	39320863	LRFN1	-	64.8482	-2.09314	0.539798	-3.87764	0.000105473	0.00483257
chr6	63275951	63319983	LGSN	-	368.827	-2.04266	0.35601	-5.73764	9.60022e-09	1.75317e-06
chr10	84139482	84154841	GHITM	+	7196.52	-2.03695	0.244801	-8.32083	8.73497e-17	6.51559e-14
chr19	8848844	8981342	MUC16	-	236.416	-2.02771	0.348804	-5.81331	6.12504e-09	1.16551e-06
chr19	38935297	38938632	ERVK9-11	-	45.0636	-1.95716	0.613298	-3.1912	0.00141685	0.0324189
chr9	35673928	35681159	CA9	+	183.287	-1.93987	0.365277	-5.31069	1.09214e-07	1.61636e-05
chr3	7951263	8611924	LMCD1-AS1	-	123.618	-1.89874	0.432489	-4.39026	1.13217e-05	0.000847902
chr6	109390215	109441171	PPIL6	-	113.497	-1.88945	0.428325	-4.41126	1.02773e-05	0.000788686
chr2	189674290	189761193	ANKAR	+	69.7108	-1.87676	0.503199	-3.72965	0.000191746	0.00755959
chr15	74202705	74336472	CCDC33	+	65.6242	-1.87364	0.512631	-3.65494	0.000257244	0.00948788
chr15	74179466	74212267	STRA6	-	621.837	-1.84128	0.293389	-6.2759	3.47608e-10	9.00305e-08
chr2	105744912	105894274	NCK2	+	77.7773	-1.81534	0.471351	-3.85137	0.000117461	0.00525579
chr11	27888838	27891033	HSP90AA2P	-	72.4044	-1.79047	0.491548	-3.64253	0.000269976	0.00987186
chr11	119364359	119526664	USP2-AS1	+	259.266	-1.74897	0.349371	-5.00605	5.55582e-07	6.51603e-05
chr13	50104833	50105174	ENSG00000273541	+	134.513	-1.72083	0.458929	-3.74966	0.000177071	0.00708589
chr11	68683779	68691175	GAL	+	131.478	-1.71968	0.430969	-3.99027	6.59992e-05	0.00345717
chr3	50674927	51384198	DOCK3	+	187.771	-1.63339	0.414132	-3.94414	8.00873e-05	0.0039108
chrX	87707579	87750883	ENSG00000282914	-	150.168	-1.61775	0.381117	-4.24476	2.18823e-05	0.00141688
chr17	15565483	15619704	FBXW10B	-	88.7594	-1.6071	0.453723	-3.54203	0.000397055	0.0130587
chr8	122485194	122733804	LINC01151	-	108.259	-1.57205	0.415606	-3.78254	0.000155236	0.0063763
chr3	32105689	32168709	GPD1L	+	1995.69	-1.56848	0.250775	-6.25451	3.98761e-10	1.01864e-07
chrX	87723928	87728679	ENSG00000289575	-	137.427	-1.56486	0.393923	-3.9725	7.11227e-05	0.00363775
chr7	100620416	100642779	TFR2	-	138.721	-1.55777	0.433513	-3.59337	0.000326431	0.0112937
chr17	50164214	50175928	SGCA	+	187.526	-1.55455	0.364313	-4.26707	1.98058e-05	0.00132856
chr15	40278176	40307935	PLCB2	-	71.2291	-1.52679	0.487333	-3.13294	0.00173066	0.036716
chr20	35172072	35216240	PROCR	+	341.306	-1.50994	0.308811	-4.88954	1.01074e-06	0.000107093
chr17	48997385	49056145	IGF2BP1	+	503.133	-1.49726	0.28571	-5.24049	1.60155e-07	2.27982e-05
chr10	1022618	1045425	IDI2-AS1	+	112.245	-1.48815	0.424392	-3.50655	0.000453949	0.0143709
chr21	43092956	43107570	U2AF1	-	82.2841	-1.44613	0.468758	-3.08503	0.00203531	0.0409434
chr9	137062127	137070557	SAPCD2	-	1267.66	-1.44155	0.325776	-4.42496	9.64586e-06	0.000743289
chr5	179678628	179731641	CANX	+	41525.1	-1.42806	0.241028	-5.92485	3.12573e-09	6.47652e-07
chr11	120236640	120319945	POU2F3	+	112.766	-1.42529	0.406371	-3.50737	0.000452561	0.0143616
chr20	46557823	46684467	SLC13A3	-	121.425	-1.42213	0.406404	-3.49929	0.000466507	0.0145855
chr3	8619386	8745040	SSUH2	-	405.389	-1.41627	0.303121	-4.67228	2.9787e-06	0.000268342
chr22	29480218	29491390	NEFH	+	415.802	-1.41135	0.289952	-4.86753	1.13001e-06	0.000117069
chr4	121816444	121823883	CCNA2	-	2766.19	-1.40373	0.244715	-5.73618	9.68341e-09	1.75317e-06
chr19	41386371	41397362	EXOSC5	-	498.897	-1.40092	0.346591	-4.042	5.29971e-05	0.00295012
chr17	29929200	30108452	EFCAB5	+	259.197	-1.39671	0.334279	-4.17828	2.93722e-05	0.00181368
chr14	20461992	20477094	PNP	+	1968.97	-1.39375	0.257948	-5.40322	6.54553e-08	1.02572e-05
chr1	156699606	156705816	CRABP2	-	755.529	-1.38392	0.275359	-5.02588	5.01134e-07	5.99048e-05
chr20	35278907	35284985	EIF6	-	2373.99	-1.3812	0.295135	-4.67989	2.87034e-06	0.000259835
chr8	127735434	127742951	MYC	+	4756.39	-1.38029	0.265894	-5.19115	2.09005e-07	2.8449e-05
chr13	50015254	50020922	KCNRG	+	148.046	-1.37933	0.414715	-3.32597	0.000881129	0.0233068
chr6	31197760	31203968	HCG27	+	124.902	-1.37436	0.416682	-3.29833	0.000972611	0.0248492
chr12	110468415	110490385	FAM216A	+	973.356	-1.36845	0.257441	-5.31559	1.0631e-07	1.58598e-05
chr12	109111218	109125594	ENSG00000256139	+	98.6969	-1.368	0.447775	-3.05511	0.00224976	0.0441151
chr12	6439001	6451607	CD27-AS1	-	86.0595	-1.34824	0.448937	-3.00319	0.00267165	0.0498709
chr6	26270918	26271413	H3C8	-	3197.27	-1.34715	0.301822	-4.46339	8.06738e-06	0.00063746
chr3	112561709	112585579	SLC35A5	+	1786.24	-1.34157	0.264585	-5.07046	3.96856e-07	4.93372e-05
chrX	37836757	37847571	DYNLT3	-	862.829	-1.32985	0.280743	-4.73688	2.17036e-06	0.000209704
chr22	21628089	21630064	YDJC	-	714.901	-1.3284	0.376705	-3.52635	0.000421325	0.0136641
chr15	32641676	32697098	SCG5	+	462.09	-1.32776	0.315479	-4.2087	2.56847e-05	0.00162362
chr5	172641263	172691540	NEURL1B	+	293.048	-1.3273	0.309925	-4.28266	1.84672e-05	0.00125368
chr16	56608584	56609497	MT2A	+	526.682	-1.32512	0.352552	-3.75866	0.000170824	0.00689507
chr2	65203502	65227605	ENSG00000273763	-	153.911	-1.3158	0.415905	-3.16372	0.00155769	0.0343232
chr22	38952741	38992778	APOBEC3A	+	204.249	-1.31522	0.360362	-3.64974	0.000262511	0.00963641
chr22	38982347	38992804	APOBEC3B	+	204.249	-1.31522	0.360362	-3.64974	0.000262511	0.00963641
chr10	102152176	102163871	NOLC1	+	7244.21	-1.30556	0.23527	-5.5492	2.86982e-08	4.69442e-06
chr13	21153595	21176552	SKA3	-	759.861	-1.3049	0.275071	-4.74387	2.09672e-06	0.00020471
chr12	48965340	48971735	WNT10B	-	195.383	-1.30148	0.350566	-3.71249	0.000205227	0.00798972
chr19	38990714	39032785	FBXO27	-	288.992	-1.29822	0.326754	-3.97308	7.09478e-05	0.00363775
chr6	39188971	39229475	KCNK5	-	231.842	-1.29648	0.337629	-3.83996	0.000123057	0.00545073
chr8	127072694	127227541	CASC19	-	45690.4	-1.29489	0.259755	-4.98505	6.19459e-07	7.00101e-05
chr14	102080742	102139699	HSP90AA1	-	14186.4	-1.29136	0.256574	-5.0331	4.82614e-07	5.80631e-05
chr2	112736349	112764664	CKAP2L	-	1450.54	-1.28442	0.269523	-4.76553	1.88359e-06	0.000185847
chr4	120055623	120066858	MAD2L1	-	1395.58	-1.28104	0.270649	-4.73323	2.20977e-06	0.000212411
chr5	13690328	14011818	DNAH5	-	269.75	-1.28012	0.344404	-3.71692	0.000201663	0.0078839
chr11	70372246	70398488	CTTN-DT	-	232.291	-1.27918	0.328389	-3.89532	9.80679e-05	0.00452666
chr11	72189558	72196323	FOLR1	+	954.617	-1.27313	0.293028	-4.34476	1.39429e-05	0.00100778
chr1	108560089	108644900	FAM102B	+	5889.73	-1.27247	0.248187	-5.12707	2.94279e-07	3.83757e-05
chr5	176383946	176388927	NOP16	-	1439.27	-1.27153	0.260966	-4.87237	1.10266e-06	0.00011552
chr13	27424619	27435823	GTF3A	+	2262.51	-1.26297	0.250599	-5.03978	4.66057e-07	5.64353e-05
chr11	27330827	27363234	CCDC34	-	1574.79	-1.26092	0.253766	-4.96881	6.73647e-07	7.52226e-05
chr4	173331376	173334432	HMGB2	-	2502.22	-1.26015	0.240177	-5.24676	1.54798e-07	2.22052e-05
chr5	173314723	173328447	STC2	-	168.128	-1.25388	0.364533	-3.43969	0.000582384	0.0172386
chr11	119093874	119095465	H2AX	-	1041.64	-1.25343	0.367595	-3.40981	0.000650081	0.0185295
chr10	93496612	93529092	CEP55	+	3155.29	-1.22801	0.248216	-4.94734	7.52349e-07	8.25283e-05
chr19	10111693	10115372	P2RY11	+	550.739	-1.22702	0.310313	-3.95412	7.68159e-05	0.00380974
chr6	27133043	27133535	H2AC11	+	3699.49	-1.21582	0.309232	-3.93175	8.43308e-05	0.00407409
chr9	86220265	86259657	C9orf153	-	136.401	-1.21557	0.404284	-3.00673	0.00264075	0.0494425
chr5	133971871	134004975	VDAC1	-	6739.13	-1.21389	0.234598	-5.17433	2.28728e-07	3.09081e-05
chr20	45812576	45816957	UBE2C	+	1727.28	-1.21279	0.256695	-4.72465	2.30509e-06	0.0002182
chr17	78214186	78225636	BIRC5	+	4222.94	-1.20618	0.24579	-4.90737	9.23066e-07	9.9499e-05
chr20	10420546	10420737	MKKS	-	201.967	-1.20326	0.359598	-3.34612	0.000819507	0.0220134
chr8	27809624	27838082	PBK	-	3093.92	-1.20121	0.27077	-4.43628	9.15282e-06	0.00071415
chr12	57930115	57936345	GIHCG	-	143.805	-1.19634	0.376397	-3.17838	0.00148099	0.0330748
chrX	72204657	72239027	ERCC6L	-	485.797	-1.19492	0.291787	-4.09519	4.21826e-05	0.00246589
chr3	129893811	129918578	TMCC1-DT	+	537.192	-1.19111	0.286141	-4.16269	3.14521e-05	0.00192301
chr2	74549026	74557551	DOK1	+	341.408	-1.18375	0.311271	-3.80298	0.000142969	0.00604368
chrX	131273506	131578899	IGSF1	-	174.824	-1.18189	0.384983	-3.06998	0.00214074	0.0425592
chr6	27808173	27808667	H2AC13	+	2007.91	-1.18063	0.314849	-3.74982	0.000176965	0.00708589
chr6	26103933	26104337	H4C3	+	3006.15	-1.18013	0.300348	-3.92919	8.52322e-05	0.004107
chr13	91347820	91354579	MIR17HG	+	785.249	-1.17768	0.309713	-3.80249	0.000143249	0.00604368
chr6	2663629	2770330	MYLK4	-	692.778	-1.17523	0.27318	-4.30204	1.69235e-05	0.00117757
chr17	3723903	3726699	HASPIN	+	547.708	-1.16828	0.276002	-4.23285	2.30745e-05	0.0014889
chr1	228458103	228463104	H2BU1	+	301.306	-1.16652	0.361286	-3.22879	0.00124315	0.029607
chr1	53242364	53328469	LRP8	-	4063.52	-1.15244	0.235658	-4.89029	1.00685e-06	0.000107093
chr17	42572310	42577831	PSMC3IP	-	640.299	-1.14442	0.278627	-4.10734	4.00248e-05	0.00236947
chr1	3625015	3630127	TPRG1L	+	299.884	-1.1426	0.32988	-3.46368	0.000532846	0.0160266
chr6	27865317	27865798	H2AC16	+	749.314	-1.1421	0.352339	-3.24148	0.00118912	0.028761
chr6	26114873	26123926	H2BC4	-	3652.86	-1.14059	0.287962	-3.96092	7.4663e-05	0.00374278
chr12	56101331	56109289	ENSG00000257411	+	2263.71	-1.13936	0.2433	-4.68292	2.82819e-06	0.000258135
chr20	38404893	38416797	ENSG00000224635	-	239.434	-1.13787	0.323028	-3.52252	0.000427462	0.0137858
chr1	211658657	211675630	NEK2	-	2485.2	-1.13627	0.254556	-4.46372	8.05479e-06	0.00063746
chr1	156594301	156601496	GPATCH4	-	2557.21	-1.13509	0.243523	-4.66112	3.14494e-06	0.000280251
chr1	7784291	7845177	PER3	+	202.324	-1.13504	0.344829	-3.29161	0.000996145	0.0253332
chr17	74987632	75005800	CDR2L	+	773.283	-1.13116	0.33246	-3.4024	0.000667959	0.0189151
chr6	27893425	27893891	H2BC17	+	1665.22	-1.13056	0.323724	-3.49237	0.000478763	0.0147975
chr5	163460203	163491941	HMMR	+	2806.82	-1.12748	0.283029	-3.98362	6.78725e-05	0.00353544
chr3	121394772	121431198	ENSG00000287022	-	453.943	-1.12727	0.340386	-3.31173	0.000927195	0.023981
chr15	41309273	41332591	OIP5	-	975.654	-1.12416	0.255135	-4.40614	1.0523e-05	0.000800949
chr22	41367333	41399326	TEF	+	228.864	-1.12013	0.345527	-3.24182	0.0011877	0.028761
chr17	8204733	8210600	AURKB	-	1030.19	-1.11294	0.291483	-3.81819	0.000134432	0.00580824
chr6	26198784	26199293	H2AC7	-	2269.35	-1.11154	0.325019	-3.41992	0.00062639	0.0181663
chr14	67360328	67386516	EIF2S1	+	3684.5	-1.11064	0.249905	-4.44426	8.81962e-06	0.000691043
chr1	150218417	150236156	ANP32E	-	3710.79	-1.10961	0.270783	-4.09777	4.17147e-05	0.00244621
chr6	26272931	26273412	H2BC10	+	1390.07	-1.10691	0.31533	-3.51031	0.000447581	0.0142675
chr6	44219553	44234142	SLC29A1	+	813.298	-1.10654	0.287607	-3.84739	0.000119385	0.00531334
chr12	56104537	56113910	PA2G4	+	5730.65	-1.1055	0.239236	-4.62095	3.81981e-06	0.000332859
chr6	27807479	27807929	H2BC13	-	1213.5	-1.10484	0.33568	-3.29133	0.000997135	0.0253332
chr14	105140982	105168824	JAG2	-	653.733	-1.0951	0.364176	-3.00705	0.00263792	0.0494425
chr6	27892699	27893185	H2AC17	-	2096.84	-1.09509	0.300641	-3.64252	0.000269983	0.00987186
chr17	6444441	6451469	PIMREG	+	473.264	-1.09181	0.324955	-3.35988	0.000779776	0.0213697
chr2	96335766	96377091	NCAPH	+	2382.22	-1.08597	0.241642	-4.49412	6.98569e-06	0.000564026
chr1	37692481	37709719	CDCA8	+	1574.85	-1.08407	0.245819	-4.41001	1.03365e-05	0.000789979
chr6	41452889	41548621	FOXP4-AS1	-	252.294	-1.0838	0.324502	-3.33988	0.00083814	0.022392
chr6	27890315	27893106	H3C12	-	2209.7	-1.07899	0.297201	-3.63051	0.000282857	0.0101829
chr6	26277609	26285638	H4C8	-	2159.08	-1.07795	0.300439	-3.58792	0.000333327	0.0114053
chr1	43358981	43363203	CDC20	+	2807.03	-1.07715	0.267896	-4.02078	5.80046e-05	0.00314439
chr21	45493572	45573365	SLC19A1	-	956.161	-1.07618	0.301606	-3.56817	0.000359484	0.0120557
chr6	26031589	26032099	H3C2	-	4723.25	-1.07474	0.327785	-3.2788	0.00104251	0.026077
chr19	10553085	10566031	KRI1	-	1925.96	-1.07464	0.272003	-3.95083	7.78793e-05	0.00385224
chr17	42844580	42850707	AOC2	+	217.743	-1.07452	0.339964	-3.16068	0.00157404	0.0344919
chr5	91380349	91616105	ARRDC3-AS1	+	870.615	-1.07222	0.322649	-3.32318	0.000889976	0.0234742
chr20	35267885	35280043	ENSG00000261582	-	1632.55	-1.07094	0.304686	-3.5149	0.000439914	0.0140954
chr11	60914158	60923443	TMEM109	+	1240.66	-1.06918	0.278712	-3.83615	0.000124981	0.00552284
chr6	27810051	27811300	H3C10	+	2757.72	-1.06765	0.337069	-3.16745	0.00153782	0.0339777
chr6	41934934	42050357	CCND3	-	1070.94	-1.06709	0.290541	-3.67275	0.000239951	0.00903631
chr12	109277978	109309284	FOXN4	-	194.475	-1.06488	0.351507	-3.02947	0.0024498	0.0468073
chr19	45406644	45410737	POLR1G	+	685.687	-1.06453	0.319564	-3.3312	0.000864731	0.0229708
chr15	59121034	59133250	ENSG00000259732	+	582.761	-1.06027	0.273123	-3.88202	0.000103594	0.00475816
chr20	3208868	3223870	ITPA	+	1042.91	-1.05995	0.277992	-3.81289	0.00013735	0.00591526
chr6	27866792	27867588	H1-5	-	3712.06	-1.05956	0.282936	-3.74488	0.000180478	0.00719134
chr2	110637528	110678063	BUB1	-	4458.17	-1.05934	0.246588	-4.29601	1.73901e-05	0.00120355
chr9	131096476	131123152	AIF1L	+	751.142	-1.05933	0.265468	-3.99041	6.59596e-05	0.00345717
chr17	44924709	44947773	KIF18B	-	1840.29	-1.05775	0.252142	-4.19506	2.72798e-05	0.00170709
chr15	68190705	68206079	CALML4	-	864.509	-1.05683	0.257243	-4.10831	3.9856e-05	0.00236699
chr7	44983019	44986961	SNHG15	-	1231.66	-1.05191	0.272689	-3.85752	0.000114542	0.00517088
chr8	100133351	100145817	FBXO43	-	836.194	-1.05039	0.283402	-3.70636	0.000210263	0.00813483
chr14	54396849	54420218	CDKN3	+	889.923	-1.0497	0.26724	-3.92794	8.56759e-05	0.00410716
chr2	24067586	24076373	SF3B6	-	2224.24	-1.0474	0.255255	-4.10334	4.07228e-05	0.00240316
chr6	26251614	26252075	H2BC9	+	2794.17	-1.04711	0.265163	-3.94891	7.85069e-05	0.00386279
chr4	4267701	4290154	LYAR	-	992.557	-1.04579	0.25437	-4.11131	3.93426e-05	0.00234396
chr3	48157146	48188417	CDC25A	-	2696.98	-1.04525	0.237667	-4.39795	1.09279e-05	0.000821708
chr17	47649476	47685505	KPNB1	+	15088	-1.04168	0.230081	-4.52746	5.96972e-06	0.000496979
chr2	10120698	10211725	RRM2	+	3200.26	-1.03702	0.24591	-4.21707	2.47499e-05	0.0015806
chr6	26033092	26033618	H2AC4	-	1221.33	-1.03413	0.328656	-3.14654	0.00165213	0.0359078
chr3	170864875	170870208	RPL22L1	-	1848.74	-1.0338	0.24914	-4.14947	3.33246e-05	0.00203084
chr6	26195595	26199293	ENSG00000282988	-	4273.11	-1.03236	0.318959	-3.23665	0.0012094	0.0291005
chr19	2867335	2883445	ZNF556	+	250.457	-1.02967	0.31922	-3.22558	0.00125716	0.0297884
chr18	80046900	80095482	RBFADN	+	448.132	-1.02548	0.287282	-3.56958	0.000357553	0.0120138
chr17	75827225	75844785	UNC13D	-	660.846	-1.02421	0.305946	-3.3477	0.000814863	0.0219907
chr4	177309874	177362936	NEIL3	+	1342.4	-1.02048	0.300247	-3.3988	0.000676826	0.0190656
chr16	68225969	68229145	ENSG00000262160	-	286.92	-1.01839	0.330412	-3.08218	0.00205491	0.0412618
chr15	67254786	67502260	IQCH	+	884.934	-1.01631	0.290071	-3.50365	0.000458927	0.0144562
chr6	26216921	26217437	H2AC8	+	2662.73	-1.01574	0.315691	-3.21753	0.001293	0.0303677
chr16	2429394	2458854	CCNF	+	1736.18	-1.01413	0.273293	-3.71079	0.000206613	0.00801022
chr6	166969626	166999065	ENSG00000227598	-	467.138	-1.01238	0.286686	-3.53133	0.000413482	0.0135037
chr2	231453531	231483641	NCL	-	16062.9	-1.01179	0.235752	-4.29178	1.77247e-05	0.00121967
chr2	200510008	200584096	SGO2	+	1437.97	-1.01172	0.312449	-3.23804	0.00120355	0.0290348
chr2	86720291	86778041	RMND5A	+	4239.82	-1.01039	0.250213	-4.03813	5.38783e-05	0.00297255
chr1	214603195	214664571	CENPF	+	22817.2	-1.00835	0.244218	-4.12889	3.64518e-05	0.00219985
chr2	189661519	189667881	ENSG00000286165	+	1021.75	-1.00479	0.255773	-3.92846	8.54924e-05	0.00410716
chr6	26156329	26157115	H1-4	+	6692.51	-1.00455	0.307474	-3.26712	0.00108649	0.0269673
chr2	189661452	189666437	ASDURF	+	447.094	-1.00416	0.289998	-3.46264	0.000534896	0.0160624
chr13	50082169	50906856	DLEU1	+	1170.29	-1.00016	0.310431	-3.22185	0.00127365	0.0300266
chr12	6844793	6851292	CDCA3	-	736.179	-0.996873	0.270756	-3.68182	0.000231579	0.00881323
chr3	40309707	40312424	EIF1B	+	357.353	-0.996395	0.315539	-3.15776	0.00158987	0.0347323
chr6	33391823	33409896	KIFC1	+	2179.95	-0.994951	0.257827	-3.85899	0.000113856	0.00516592
chr2	189661385	189670831	ASNSD1	+	1219.67	-0.989604	0.258239	-3.83212	0.000127042	0.00558744
chr6	27125897	27132795	H2BC11	-	2462.68	-0.989438	0.31776	-3.1138	0.00184697	0.0384402
chr6	27146361	27146855	H2BC12	-	1773.96	-0.989281	0.324972	-3.0442	0.00233301	0.0454034
chr14	34709113	34714823	CFL2	-	1276.57	-0.989064	0.286967	-3.44662	0.000567654	0.0169099
chr8	27771949	27812640	ESCO2	+	1503.5	-0.98823	0.274312	-3.60257	0.000315084	0.0110375
chr1	53765478	53838463	NDC1	-	6134.81	-0.986533	0.249463	-3.95463	7.66524e-05	0.00380974
chr6	26250142	26250635	H3C7	-	2907.02	-0.985528	0.326868	-3.01506	0.00256927	0.0484937
chr12	54230942	54280133	CBX5	-	6374.05	-0.984082	0.248399	-3.96169	7.44207e-05	0.00374278
chr16	58295080	58406147	GINS3	+	616.033	-0.98328	0.268432	-3.66306	0.000249223	0.009258
chr4	1712858	1745171	TACC3	+	2231.44	-0.982519	0.2582	-3.80526	0.000141653	0.00604368
chr1	211743457	211830763	LPGAT1	-	7538.95	-0.982004	0.256926	-3.82213	0.000132306	0.00575116
chr15	81007033	81149179	CFAP161	+	263.014	-0.98193	0.32579	-3.01399	0.00257834	0.0486156
chr19	1397026	1401570	GAMT	-	948.896	-0.9814	0.314295	-3.12255	0.00179293	0.0377791
chr15	40161023	40221123	BUB1B	+	5037.21	-0.980685	0.248648	-3.94407	8.01118e-05	0.0039108
chr2	10439968	10448327	ODC1	-	2437.5	-0.980544	0.25111	-3.90484	9.42862e-05	0.00438466
chr5	69167135	69178245	CCNB1	+	6106.1	-0.978381	0.239856	-4.07903	4.52242e-05	0.00258693
chr4	107989714	108035241	HADH	+	1710.07	-0.978326	0.249174	-3.92628	8.62692e-05	0.0041109
chr8	41529218	41545030	GINS4	+	948.34	-0.977303	0.257175	-3.80015	0.000144608	0.00607355
chrX	154762742	154777689	DKC1	+	4557.04	-0.97704	0.238246	-4.10097	4.11425e-05	0.00242027
chr17	81703367	81707517	MRPL12	+	1542.44	-0.976476	0.314249	-3.10733	0.00188786	0.0391166
chr8	49054311	49076093	PPDPFL	+	1728.22	-0.975895	0.253399	-3.85123	0.000117528	0.00525579
chr11	90200429	90223077	CHORDC1	-	4647.67	-0.975753	0.297787	-3.27668	0.00105037	0.0262213
chr17	2322396	2336657	TSR1	-	6168.91	-0.974072	0.236053	-4.1265	3.68322e-05	0.00221564
chr16	19523811	19553408	CCP110	+	1522.06	-0.970403	0.274864	-3.53048	0.000414801	0.0135231
chr2	241675747	241686944	DTYMK	-	1154.86	-0.969213	0.283452	-3.41932	0.000627789	0.0181786
chr7	151207837	151227166	ABCF2-H2BK1	-	2952.84	-0.968119	0.25167	-3.84677	0.000119684	0.00531395
chr5	154887411	154938211	GEMIN5	-	2532.28	-0.967924	0.245586	-3.94128	8.10493e-05	0.00394623
chr7	151211484	151227205	ABCF2	-	2910.57	-0.964758	0.251662	-3.83354	0.00012631	0.00556841
chr10	58385345	58399220	TFAM	+	3146.21	-0.963674	0.270714	-3.55975	0.00037121	0.0123392
chr1	15659713	15662033	RSC1A1	+	424.941	-0.961764	0.295889	-3.25042	0.00115235	0.0283122
chr1	10456522	10472529	DFFA	-	2833.98	-0.960143	0.245316	-3.91391	9.08138e-05	0.00428733
chr7	36389821	36453791	ANLN	+	9463.36	-0.959175	0.245676	-3.90423	9.45265e-05	0.0043849
chr9	4490468	4587469	SLC1A1	+	297.787	-0.958942	0.312309	-3.0705	0.00213703	0.0425308
chr12	66302493	66343643	HELB	+	506.191	-0.95882	0.305254	-3.14106	0.00168339	0.0362572
chr6	27838545	27855709	H2BC15	+	1271.6	-0.957973	0.294079	-3.25753	0.00112386	0.0277219
chr1	163266576	163355764	NUF2	+	1972.23	-0.956296	0.280207	-3.41282	0.000642951	0.0184174
chr8	145052465	145066685	C8orf33	+	2967.46	-0.955309	0.25017	-3.81864	0.000134192	0.00580824
chr12	10604193	10613609	MAGOHB	-	1436.48	-0.94991	0.276993	-3.42936	0.000604996	0.0177389
chr16	46578591	46621379	SHCBP1	-	2584.9	-0.948971	0.258384	-3.67271	0.00023999	0.00903631
chr8	25459199	25507911	CDCA2	+	1992.73	-0.945866	0.247124	-3.82749	0.000129457	0.00566452
chr20	31739271	31801805	TPX2	+	5705.17	-0.944549	0.233342	-4.04792	5.16757e-05	0.00289384
chr11	46856717	46918642	LRP4	-	383.824	-0.942729	0.30988	-3.04224	0.00234828	0.045426
chr15	41320794	41381050	NUSAP1	+	6906.96	-0.939478	0.23264	-4.03833	5.38323e-05	0.00297255
chrX	14690388	14873255	FANCB	-	2574.3	-0.938069	0.302882	-3.09714	0.00195395	0.0397787
chr3	121431431	121545988	POLQ	-	4511.26	-0.936528	0.275546	-3.39881	0.000676805	0.0190656
chr15	40218500	40264890	BUB1B-PAK6	+	752.166	-0.93494	0.286189	-3.26686	0.00108748	0.0269673
chr10	100987367	100994403	TWNK	+	895.369	-0.933648	0.257289	-3.62879	0.000284751	0.0102116
chr11	102396332	102470384	TMEM123	-	5962.77	-0.932879	0.271266	-3.43899	0.000583897	0.017256
chr15	45023147	45077185	SORD	+	784.592	-0.932298	0.263854	-3.53339	0.000410267	0.0134222
chr1	202331544	202341984	UBE2T	-	2937.22	-0.929962	0.238299	-3.90251	9.52019e-05	0.00440527
chr12	98515579	98550351	TMPO	+	12697	-0.929314	0.251133	-3.70048	0.000215193	0.00829116
chr17	42810134	42833350	BECN1	-	1477.82	-0.928641	0.249982	-3.71483	0.000203342	0.00793291
chr14	105009573	105021083	CDCA4	-	844.553	-0.927159	0.279601	-3.31601	0.000913118	0.0237663
chr15	55180806	55197049	RSL24D1	-	2259.24	-0.926869	0.273948	-3.38337	0.000716013	0.0199883
chr17	40388525	40417896	TOP2A	-	18843.4	-0.925497	0.255481	-3.62256	0.000291699	0.0104407
chr20	38926312	38953106	FAM83D	+	2136.93	-0.923171	0.262849	-3.51217	0.000444458	0.0141922
chr17	5440917	5468982	DHX33	-	1527.55	-0.919064	0.244815	-3.75411	0.000173956	0.00700635
chr2	33532744	33599347	FAM98A	-	2045.66	-0.91741	0.278165	-3.29808	0.000973473	0.0248492
chr12	64404392	64451125	XPOT	+	8023.51	-0.917029	0.248811	-3.68564	0.000228128	0.00871746
chr2	74135400	74147912	BOLA3	-	746.491	-0.917018	0.26535	-3.45588	0.000548498	0.0163917
chr12	102197585	102402596	HELLPAR	+	1145.14	-0.917004	0.304325	-3.01324	0.00258475	0.0486872
chr17	4997950	5028401	KIF1C	+	6080.5	-0.916981	0.262696	-3.49065	0.000481844	0.0148359
chr6	38675925	38703145	GLO1	-	7011.27	-0.915884	0.255922	-3.57877	0.000345217	0.0116977
chr6	26199516	26199988	H2BC7	+	1772.59	-0.915653	0.301315	-3.03886	0.00237478	0.0457574
chr7	152644776	152676193	XRCC2	-	1709.37	-0.912848	0.253411	-3.60225	0.000315477	0.0110375
chr20	9986126	10058303	ANKEF1	+	781.822	-0.911021	0.267054	-3.41138	0.000646357	0.0184866
chr14	77457870	77469472	AHSA1	+	3133.91	-0.909803	0.247704	-3.67294	0.000239772	0.00903631
chr15	32613860	32697095	ARHGAP11A-SCG5	+	2752.47	-0.909297	0.267636	-3.39752	0.000680005	0.0191263
chr2	61868085	61888671	CCT4	-	11832.7	-0.90805	0.239151	-3.79697	0.000146473	0.00609695
chr1	52684449	52698347	COA7	-	2227.68	-0.906389	0.246521	-3.67673	0.000236244	0.00895423
chr2	168834132	168913371	SPC25	-	619.41	-0.902741	0.298451	-3.02476	0.00248832	0.0473009
chr15	59105126	59125045	CCNB2	+	2144.49	-0.901962	0.248103	-3.63543	0.000277516	0.0100488
chr1	25884181	25906991	STMN1	-	5263.26	-0.900595	0.241057	-3.73603	0.000186945	0.00741735
chr20	56369389	56392337	AURKA	-	4406.68	-0.900511	0.237113	-3.79782	0.000145976	0.00609695
chrX	107628428	107651993	PRPS1	+	2895.88	-0.898014	0.245116	-3.66363	0.000248667	0.009258
chr17	58083419	58095542	DYNLL2	+	1854.43	-0.897197	0.246625	-3.6379	0.000274867	0.00999167
chr15	40217428	40277487	PAK6	+	948.154	-0.889696	0.280394	-3.17302	0.0015086	0.0335709
chr6	85607779	85644063	SYNCRIP	-	7235.61	-0.887829	0.254619	-3.48689	0.000488671	0.0149635
chr12	2857680	2877174	FOXM1	-	2503.32	-0.885741	0.254795	-3.4763	0.000508392	0.0153904
chr21	36069941	36073166	CBR1	+	1593.71	-0.884037	0.279451	-3.16348	0.00155897	0.0343232
chr4	158709127	158723396	PPID	-	1115.78	-0.883331	0.267846	-3.29791	0.000974085	0.0248492
chr17	75272981	75289510	SLC25A19	-	955.875	-0.882325	0.292253	-3.01905	0.00253569	0.0481033
chr6	26204610	26205021	H4C5	+	2968.38	-0.882279	0.279016	-3.1621	0.00156633	0.0343635
chr5	160421855	160428739	PTTG1	+	2769.45	-0.882099	0.252026	-3.50003	0.000465206	0.0145855
chr13	113297239	113323672	LAMP1	+	8512.24	-0.880664	0.261293	-3.37041	0.000750564	0.0207972
chr17	30378927	30469989	CPD	+	7346.33	-0.875912	0.260746	-3.35925	0.000781538	0.0213697
chr9	89311195	89316703	CKS2	+	2855.45	-0.875489	0.245732	-3.56278	0.000366947	0.0122361
chr1	1401909	1407293	MRPL20	-	1078.51	-0.872566	0.266033	-3.27991	0.00103839	0.026077
chr7	158631169	158704804	NCAPG2	-	4283.35	-0.87152	0.25531	-3.41357	0.000641172	0.0184103
chr16	23677656	23690367	PLK1	+	1266.75	-0.870918	0.2682	-3.24727	0.00116519	0.0284404
chr1	89524829	89597861	LRRC8B	+	862.188	-0.870761	0.269996	-3.22509	0.00125932	0.0298018
chr11	68754620	68844410	CPT1A	-	3522.62	-0.87016	0.241832	-3.59819	0.000320434	0.0111482
chr5	171387116	171411810	NPM1	+	17010	-0.868941	0.234574	-3.70434	0.000211942	0.00818282
chr19	34428352	34471251	UBA2	+	6231.68	-0.868198	0.242347	-3.58245	0.000340383	0.0115619
chrX	154348524	154374634	FLNA	-	47418.3	-0.86798	0.287828	-3.01562	0.00256454	0.0484937
chr16	20702816	20742084	THUMPD1	-	1259.86	-0.86648	0.254812	-3.40047	0.000672698	0.0190068
chr1	211571568	211579161	SLC30A1	-	5304.16	-0.864992	0.267374	-3.23514	0.00121583	0.0291813
chr1	200551497	200620751	KIF14	-	3932.81	-0.864573	0.280651	-3.0806	0.00206582	0.0412871
chr11	57325986	57335892	SSRP1	-	7381.23	-0.863503	0.240829	-3.58554	0.000336375	0.0114885
chr20	2652593	2658393	NOP56	+	4839.56	-0.862001	0.240112	-3.59	0.000330684	0.0113767
chr4	177430774	177442437	AGA	-	493.311	-0.860699	0.282574	-3.04593	0.00231965	0.0452598
chr1	93866284	93879918	DNTTIP2	-	4939.65	-0.85705	0.254736	-3.36447	0.000766918	0.021156
chr18	50375040	50394168	SKA1	+	618.136	-0.856863	0.273178	-3.13664	0.00170894	0.0365565
chr5	169583636	169604778	SPDL1	+	2665.72	-0.856135	0.266778	-3.20917	0.0013312	0.0310514
chr10	128096659	128126423	MKI67	-	7212.4	-0.855415	0.244426	-3.49969	0.000465808	0.0145855
chr1	65147549	65232145	AK4	+	2520.27	-0.850282	0.246759	-3.4458	0.000569371	0.016934
chr16	4257186	4273075	TFAP4	-	932.769	-0.848895	0.27356	-3.10314	0.00191477	0.0391951
chr1	201829149	201884291	IPO9	+	8355.51	-0.847955	0.230019	-3.68645	0.0002274	0.0087075
chr9	137241287	137243707	TUBB4B	+	6033.12	-0.846864	0.272715	-3.1053	0.00190085	0.0391255
chr15	83016423	83067252	BTBD1	-	5352.69	-0.846516	0.257353	-3.28932	0.00100429	0.0254804
chr11	60842113	60851081	CCDC86	+	1025.89	-0.845683	0.269018	-3.14359	0.00166888	0.0360715
chr15	44537125	44563029	EIF3J	+	3413.5	-0.844873	0.265892	-3.1775	0.0014855	0.0331358
chr5	10249929	10266389	CCT5	+	39550.5	-0.843198	0.231824	-3.63723	0.000275584	0.00999824
chr22	39519695	39522683	ATF4	+	4224.89	-0.842778	0.254291	-3.31422	0.000918977	0.0238346
chr9	113275642	113294009	PRPF4	+	2427.26	-0.841432	0.237683	-3.54014	0.000399914	0.0131296
chr15	32615144	32639941	ARHGAP11A	+	2229.04	-0.840549	0.267606	-3.14099	0.00168376	0.0362572
chr21	46229196	46259390	MCM3AP-AS1	+	642.187	-0.838831	0.274406	-3.0569	0.00223637	0.0439914
chr3	197960200	198043720	LMLN	+	622.453	-0.837754	0.274139	-3.05595	0.0022435	0.0440852
chr18	21612314	21633524	SNRPD1	+	1792.24	-0.835576	0.246667	-3.38746	0.000705429	0.0197224
chr1	154962298	154974395	SHC1	-	4049.53	-0.835442	0.258869	-3.22728	0.00124975	0.0296884
chr1	225401502	225428925	LBR	-	4151.39	-0.833991	0.263449	-3.16567	0.00154729	0.0341465
chr1	174999163	175012027	CACYBP	+	3520.17	-0.831802	0.249424	-3.3349	0.000853309	0.0227192
chr11	125591712	125625215	STT3A	+	4265.92	-0.831066	0.233081	-3.56556	0.000363076	0.0121338
chr6	36854827	36874803	PPIL1	-	999.535	-0.830462	0.256135	-3.24228	0.00118577	0.028761
chr8	10725399	10839847	PINX1	-	639.928	-0.828906	0.275205	-3.01196	0.00259566	0.0488434
chr9	37485948	37503697	POLR1E	+	1893.66	-0.828446	0.242982	-3.40949	0.000650836	0.0185295
chr1	35599541	35641526	PSMB2	-	4530.23	-0.82809	0.236111	-3.5072	0.000452843	0.0143616
chr1	15617458	15669044	DDI2	+	2171.82	-0.82584	0.253263	-3.2608	0.00111099	0.0274407
chr6	110958706	110967890	GTF3C6	+	1374.8	-0.823368	0.27414	-3.00346	0.0026693	0.0498709
chr7	76326799	76358991	YWHAG	-	8728.36	-0.823196	0.233291	-3.52862	0.000417725	0.0135947
chr12	2794970	2805423	FKBP4	+	4030.41	-0.822215	0.248322	-3.31108	0.000929368	0.024004
chr15	68184032	68229718	ENSG00000260007	-	2925.45	-0.822196	0.247988	-3.31546	0.000914909	0.0237663
chr16	69741871	69754926	NOB1	-	1324.82	-0.811857	0.260106	-3.12125	0.00180084	0.0378603
chr1	19251805	19260128	MRTO4	+	1406.87	-0.811101	0.261369	-3.10328	0.00191389	0.0391951
chr3	124730433	124749273	UMPS	+	2475.25	-0.810725	0.238027	-3.40602	0.000659171	0.0187096
chr9	96385941	96418370	ZNF367	-	1926.34	-0.810575	0.2601	-3.1164	0.00183076	0.0382308
chr12	53268299	53293638	ESPL1	+	2227.72	-0.810062	0.260918	-3.10466	0.00190501	0.0391255
chr5	150357629	150400308	TCOF1	+	4725.64	-0.809732	0.255447	-3.16986	0.0015251	0.0337768
chr1	23778418	23788232	PITHD1	+	862.354	-0.809202	0.257306	-3.14491	0.0016614	0.0360253
chr16	58231157	58283836	CCDC113	+	771.008	-0.808813	0.263728	-3.06684	0.00216334	0.0428714
chr7	2354086	2380745	EIF3B	+	9547.58	-0.804477	0.258807	-3.10841	0.001881	0.0390177
chr11	236966	252984	PSMD13	+	2545.35	-0.804347	0.239432	-3.35939	0.000781147	0.0213697
chr20	58839718	58911192	GNAS	+	29493.7	-0.804033	0.25637	-3.13622	0.00171138	0.0365565
chr1	229626247	229660200	URB2	+	2616.18	-0.803633	0.238275	-3.37272	0.000744306	0.0206545
chr6	10694972	10709782	PAK1IP1	+	1685.63	-0.800899	0.251318	-3.18679	0.00143861	0.032574
chr9	110243810	110256507	TXN	-	7678.33	-0.800614	0.241132	-3.32022	0.000899453	0.0236239
chr8	65602458	65634217	ARMC1	-	2015.61	-0.800494	0.251074	-3.18827	0.00143124	0.032509
chr15	40382721	40394288	KNSTRN	+	2301.48	-0.800071	0.240219	-3.33058	0.000866639	0.0229887
chr12	46183063	46270017	SLC38A1	-	25064.5	-0.794567	0.253835	-3.13025	0.00174659	0.0369699
chr20	20017310	20033655	NAA20	+	1490.4	-0.792137	0.250942	-3.15666	0.00159588	0.034807
chr6	44246166	44253888	HSP90AB1	+	31302.7	-0.791191	0.231553	-3.41689	0.000633416	0.0182932
chr11	123057489	123063230	HSPA8	-	43409.7	-0.790716	0.231886	-3.40993	0.000649795	0.0185295
chr4	99948086	99950355	H2AZ1	-	7994.59	-0.790291	0.250581	-3.15383	0.00161142	0.0350638
chr9	113407235	113410675	POLE3	-	2538.43	-0.78977	0.253975	-3.10963	0.0018732	0.0389426
chr2	233833416	233854566	HJURP	-	1338.92	-0.789293	0.247589	-3.18792	0.00143301	0.0325095
chr5	34915677	34925996	BRIX1	+	6710.06	-0.788299	0.253927	-3.10443	0.00190645	0.0391255
chr3	44761721	44873376	KIF15	+	2269.55	-0.787206	0.249303	-3.15763	0.00159059	0.0347323
chr10	92574105	92655395	KIF11	+	5677.03	-0.783877	0.257622	-3.04274	0.00234435	0.045426
chr1	67407810	67430415	SERBP1	-	26103.7	-0.781701	0.240637	-3.24847	0.00116029	0.0283818
chr7	156949712	156973176	NOM1	+	1832.35	-0.780351	0.243843	-3.20022	0.00137325	0.0317444
chr12	110614027	110663431	TCTN1	+	924.939	-0.778613	0.2568	-3.03199	0.00242951	0.0464671
chr13	113584721	113641473	TFDP1	+	4141.27	-0.775074	0.244161	-3.17444	0.00150128	0.0334478
chr12	120446444	120463749	GATC	+	1748.22	-0.774591	0.246529	-3.14199	0.00167806	0.0362181
chr9	132670035	132694953	GTF3C4	+	2523.39	-0.773799	0.241403	-3.20542	0.00134864	0.0313193
chr13	26132115	26222314	RNF6	-	1889.13	-0.772266	0.24567	-3.14351	0.00166933	0.0360715
chr20	5114953	5126626	PCNA	-	5544.19	-0.77215	0.235079	-3.28464	0.00102112	0.0257672
chr14	22920525	22929408	PRMT5	-	2567.34	-0.769867	0.253752	-3.03393	0.00241389	0.0462158
chr14	50857891	50944483	PYGL	-	1636.47	-0.769743	0.247959	-3.10432	0.00190718	0.0391255
chr2	202265736	202303661	NOP58	+	5981.3	-0.769156	0.241642	-3.18304	0.0014574	0.0327959
chr1	117929720	117966543	WDR3	+	6090	-0.767419	0.237231	-3.2349	0.00121685	0.0291813
chr18	57600656	57622213	NARS1	-	7215.84	-0.766645	0.236292	-3.24448	0.00117664	0.0286448
chr9	78297125	78330093	PSAT1	+	1920.7	-0.766374	0.240989	-3.18012	0.00147213	0.032956
chr9	37512547	37592469	ENSG00000256966	-	2775.15	-0.762913	0.239255	-3.1887	0.00142913	0.0325019
chr4	2937933	2963406	NOP14	-	2319.63	-0.759972	0.248209	-3.06183	0.00219991	0.0434116
chr9	37582646	37592604	TOMM5	-	2333.15	-0.756942	0.241345	-3.13635	0.00171065	0.0365565
chr20	646626	675800	ENSG00000270299	-	1342.97	-0.755698	0.248988	-3.03507	0.00240477	0.0460886
chr14	69380128	69398299	ERH	-	2544.19	-0.75476	0.241583	-3.12422	0.00178277	0.0376252
chr9	36572862	36677683	MELK	+	3945.55	-0.754676	0.248098	-3.04184	0.00235135	0.0454384
chr10	56357227	56361273	ZWINT	-	3643.34	-0.754568	0.240409	-3.13868	0.0016971	0.0364603
chr15	90966040	90995629	PRC1	-	7461.61	-0.753832	0.232285	-3.2453	0.00117328	0.0286004
chr20	646615	653200	SRXN1	-	1341.12	-0.75326	0.248818	-3.02735	0.00246709	0.0470412
chr7	16646131	16706523	BZW2	+	4882.07	-0.75087	0.243367	-3.08533	0.00203323	0.0409434
chr3	133573686	133590261	CDV3	+	9485.43	-0.750836	0.243062	-3.08907	0.00200786	0.0406922
chr20	49046246	49096960	CSE1L	+	13892	-0.750089	0.242934	-3.08762	0.00201765	0.0407199
chr6	34757505	34773857	SNRPC	+	2497.17	-0.749234	0.238315	-3.14387	0.00166728	0.0360715
chr9	128683424	128696400	SET	+	8794.64	-0.748773	0.238922	-3.13396	0.00172466	0.0367069
chr6	159778498	159789703	TCP1	-	8356.14	-0.748089	0.232008	-3.22441	0.00126233	0.0298352
chr13	113491021	113554590	TMCO3	+	3550.66	-0.747381	0.24263	-3.08034	0.00206767	0.0412871
chr10	13161558	13211110	MCM10	+	1860.34	-0.747169	0.24171	-3.09118	0.00199366	0.0404545
chr11	4094707	4138932	RRM1	+	12172.2	-0.746978	0.230922	-3.23476	0.00121745	0.0291813
chr7	56051685	56063989	CCT6A	+	15460	-0.742005	0.238077	-3.11666	0.00182912	0.0382308
chr2	112541915	112579818	POLR1B	+	4183.21	-0.740785	0.23642	-3.13334	0.00172826	0.0367069
chr12	111842228	111902222	MAPKAPK5	+	2482.4	-0.738614	0.238271	-3.09989	0.00193594	0.0394983
chr16	11833850	11851580	RSL1D1	-	7037.68	-0.731085	0.233785	-3.12717	0.00176499	0.037317
chr16	74296814	74306288	PSMD7	+	3928.64	-0.728783	0.234702	-3.10514	0.00190191	0.0391255
chr3	64010550	64024010	PSMD6	-	3449.55	-0.722067	0.240464	-3.00281	0.00267498	0.0498831
chr2	197486584	197516737	HSPD1	-	19157.3	-0.719898	0.237889	-3.0262	0.00247652	0.0471246
chr12	49976923	50033136	RACGAP1	-	5474.4	-0.716056	0.23849	-3.00245	0.00267815	0.0498922
chr17	32444379	32483319	PSMD11	+	5418.56	-0.713712	0.234474	-3.04388	0.00233548	0.0454034
chr10	119033670	119080823	EIF3A	-	18940.6	-0.697029	0.229376	-3.0388	0.00237523	0.0457574
chr3	149369022	149377692	TM4SF1	-	31753	0.72201	0.232544	3.10483	0.0019039	0.0391255
chr1	202724495	202808487	KDM5B	-	4808.95	0.730894	0.237867	3.0727	0.00212132	0.0422633
chr18	50560087	50731826	MAPK4	+	16631.6	0.746553	0.230619	3.23717	0.00120723	0.0290859
chr3	15601341	15722311	BTD	+	1134.61	0.752689	0.250468	3.00513	0.00265469	0.0496537
chr8	23020133	23069031	TNFRSF10B	-	4585.48	0.753421	0.233236	3.2303	0.00123662	0.029489
chr11	47214465	47239217	DDB2	+	2923.55	0.756149	0.241323	3.13335	0.00172822	0.0367069
chr2	25042076	25159135	EFR3B	+	2618.23	0.758383	0.242008	3.1337	0.00172615	0.0367069
chr2	46293667	46386697	EPAS1	+	3547.92	0.759917	0.236814	3.20892	0.00133233	0.0310514
chr10	68087897	68212017	MYPN	+	14315.7	0.759933	0.242209	3.1375	0.00170393	0.0365565
chr6	37257772	37332970	TBC1D22B	+	1504.1	0.764603	0.251032	3.04585	0.00232027	0.0452598
chr5	14704800	14871778	ANKH	-	2881.31	0.76509	0.238162	3.21248	0.00131596	0.030752
chr4	185585444	185956652	SORBS2	-	9524.74	0.76676	0.242408	3.16309	0.00156102	0.0343277
chr4	86935002	87141039	AFF1	+	13786.1	0.770069	0.252411	3.05085	0.00228195	0.0446056
chr15	48408313	48645721	FBN1	-	4743.02	0.77132	0.236094	3.267	0.00108692	0.0269673
chr9	73151865	73170393	ANXA1	+	6434.84	0.777342	0.241969	3.21256	0.00131557	0.030752
chr10	1177313	1737525	ADARB2	-	42010.5	0.782224	0.233861	3.34482	0.00082335	0.0220601
chr17	7240427	7244635	ENSG00000262526	-	1986.31	0.782584	0.25928	3.0183	0.00254201	0.0481742
chr7	93921735	93928610	GNG11	+	1070.81	0.783055	0.258611	3.02793	0.00246234	0.0469987
chr3	190514051	190659750	IL1RAP	+	10603.8	0.790293	0.262072	3.01556	0.00256508	0.0484937
chr1	45016399	45306209	ZSWIM5	-	1629.49	0.790867	0.260056	3.04114	0.00235681	0.0454967
chr18	76978827	77133683	MBP	-	702.127	0.794516	0.263887	3.01082	0.00260545	0.0489783
chr20	11890723	11926609	BTBD3	+	14393.6	0.795401	0.240475	3.30762	0.000940936	0.0242356
chr18	7566782	8406861	PTPRM	+	15348	0.800216	0.250059	3.20011	0.00137375	0.0317444
chr6	117453817	117569858	DCBLD1	+	1705.32	0.801647	0.250784	3.19657	0.00139072	0.0320571
chr15	31475398	31870789	OTUD7A	-	2136.35	0.802092	0.247585	3.23966	0.00119671	0.0289072
chr19	34254552	34355566	GARRE1	+	2387.34	0.80683	0.246061	3.27898	0.00104183	0.026077
chrX	54807599	54816015	MAGED2	+	2823.84	0.807929	0.249241	3.24155	0.0011888	0.028761
chr17	7240008	7242449	GABARAP	-	1754.4	0.809277	0.25961	3.11728	0.00182526	0.0382308
chr14	67533290	67589612	PLEKHH1	+	1628.11	0.81026	0.2537	3.19377	0.00140429	0.032245
chr5	37106228	37249376	CPLANE1	-	16272.4	0.81225	0.260431	3.11887	0.00181547	0.0381098
chr1	233904676	234324511	SLC35F3	+	9579.34	0.814832	0.257223	3.1678	0.00153596	0.033977
chr3	98579446	98593648	CPOX	-	750.348	0.814934	0.26775	3.04364	0.00233737	0.0454034
chr17	15229773	15272292	PMP22	-	2237.44	0.815432	0.242803	3.35841	0.000783919	0.0213945
chr1	207321519	207386804	CD55	+	19408.4	0.816813	0.232469	3.51364	0.000442014	0.0141384
chr9	72114595	72257193	GDA	+	9639.27	0.818434	0.255074	3.20861	0.00133377	0.0310514
chr1	112396214	112463456	CTTNBP2NL	+	1768.53	0.820813	0.24743	3.31735	0.000908754	0.0237663
chr10	67921899	68075301	HERC4	-	17433.6	0.821679	0.266075	3.08815	0.0020141	0.0406922
chr15	90529923	90645345	CRTC3	+	5879.63	0.823333	0.24055	3.42271	0.000620009	0.0180655
chr9	17579066	17797124	SH3GL2	+	8232.93	0.824967	0.249522	3.30619	0.000945755	0.0243261
chr4	86886472	86936178	ENSG00000285458	-	687.713	0.825544	0.271354	3.04231	0.00234772	0.045426
chr12	26971579	27014434	TM7SF3	-	4425.44	0.827072	0.236814	3.4925	0.000478525	0.0147975
chr22	27748277	27801756	MN1	-	1663.8	0.828382	0.275477	3.00708	0.00263771	0.0494425
chr7	44606572	44709066	OGDH	+	7807.05	0.830265	0.258143	3.2163	0.00129853	0.0304527
chr1	175156986	175192999	KIAA0040	-	997.812	0.831791	0.252939	3.28851	0.0010072	0.0255194
chr1	201539127	201826969	NAV1	+	3513.87	0.833425	0.251521	3.31355	0.000921212	0.0238594
chr7	50590063	50793462	GRB10	-	2036.54	0.834608	0.240417	3.4715	0.00051755	0.0156422
chr13	51930436	52012125	ATP7B	-	1712.94	0.835752	0.244849	3.41334	0.000641715	0.0184103
chr20	34872146	34927962	ACSS2	+	1575.37	0.835986	0.251052	3.32993	0.000868663	0.0230097
chr2	30146941	30160533	YPEL5	+	1151.34	0.839184	0.269395	3.11507	0.00183902	0.0383601
chr11	27654893	27722058	BDNF	-	1514.59	0.839884	0.263671	3.18535	0.00144581	0.0326411
chr3	189956728	190122437	P3H2	-	6810.51	0.840956	0.249716	3.36765	0.00075812	0.0209754
chr12	7089587	7109238	C1RL	-	1005.84	0.841681	0.271124	3.10442	0.00190655	0.0391255
chr3	185643130	185825042	IGF2BP2	-	1463.09	0.841935	0.272856	3.08564	0.00203116	0.0409434
chrX	18425583	18653629	CDKL5	+	2125.69	0.845146	0.244845	3.45175	0.000556957	0.0166178
chr1	213051233	213274774	RPS6KC1	+	8204.72	0.845187	0.26568	3.18122	0.00146654	0.0328703
chr8	139727725	140458579	TRAPPC9	-	10743.1	0.846783	0.234259	3.61472	0.000300669	0.0106392
chr9	99104038	99154192	TGFBR1	+	16054.8	0.848346	0.266041	3.18878	0.00142873	0.0325019
chr12	48337180	48351414	ZNF641	-	1795.92	0.848659	0.242551	3.49889	0.000467191	0.0145855
chrX	117897813	118117340	KLHL13	-	20798.2	0.848707	0.258862	3.27861	0.00104319	0.026077
chr3	99638475	99799226	COL8A1	+	829.997	0.850598	0.26702	3.18553	0.00144491	0.0326411
chr17	49289206	49362473	ZNF652	-	3770.94	0.850908	0.257111	3.30949	0.000934652	0.024107
chr13	20973036	21061586	LATS2	-	4510.32	0.855908	0.236589	3.61771	0.000297224	0.0105776
chr16	18791669	18801572	ARL6IP1	-	3134.85	0.856689	0.256043	3.34588	0.000820225	0.0220134
chr3	122795069	122881139	SLC49A4	+	2281.51	0.857222	0.252529	3.39454	0.000687434	0.0192771
chr17	64449037	64468643	MILR1	+	2616.48	0.857814	0.240212	3.57106	0.000355535	0.0119675
chr11	122028325	122556721	MIR100HG	-	14835.2	0.86005	0.275776	3.11865	0.0018168	0.0381098
chr10	88953813	89029605	FAS	+	1120.37	0.861304	0.277033	3.10902	0.00187706	0.0389794
chr10	23694746	24547848	KIAA1217	+	932.36	0.866385	0.264054	3.28108	0.00103409	0.0260239
chrX	134796395	134854835	PABIR3	+	1473.02	0.866701	0.248404	3.48908	0.000484689	0.0148659
chr7	95583499	95596516	PDK4	-	1153.42	0.870554	0.273635	3.18144	0.00146546	0.0328703
chr5	150601080	150659207	SYNPO	+	1785.64	0.871003	0.281529	3.09384	0.00197587	0.040181
chr7	138594285	138701362	SVOPL	-	4251.47	0.87553	0.233699	3.7464	0.00017939	0.0071633
chr3	30606601	30694142	TGFBR2	+	1595.39	0.875833	0.249111	3.51584	0.000438367	0.01407
chr22	30693782	30907824	OSBP2	+	3445.18	0.876821	0.25125	3.48983	0.00048333	0.0148487
chr20	59123381	59259113	ZNF831	+	20279.5	0.877559	0.233249	3.76233	0.000168341	0.00681589
chr1	148290889	148519604	LINC01138	-	1198.27	0.878096	0.258096	3.40221	0.00066844	0.0189151
chr17	50426158	50474845	ACSF2	+	1780.66	0.878736	0.27189	3.23196	0.00122945	0.0293934
chr8	76980258	77001044	PEX2	-	1028.49	0.879746	0.261594	3.36302	0.00077095	0.0212045
chr5	795605	858973	ZDHHC11	-	4128.45	0.880134	0.252038	3.49207	0.000479285	0.0147975
chr12	43835967	44389762	TMEM117	+	6092.88	0.881142	0.285293	3.08855	0.00201134	0.0406922
chr11	128965060	129279324	ARHGAP32	-	4568.47	0.885612	0.284342	3.1146	0.00184195	0.0383784
chr5	95962001	96631085	ENSG00000251314	+	2148.53	0.886611	0.284451	3.11692	0.00182751	0.0382308
chr2	72175984	72826041	EXOC6B	-	6997.24	0.887884	0.28113	3.15827	0.00158706	0.0347323
chr7	69598296	70793506	AUTS2	+	6985.7	0.888523	0.265535	3.34616	0.000819392	0.0220134
chr10	32958437	33082409	ITGB1-DT	+	403.885	0.889933	0.28959	3.07308	0.00211858	0.0422538
chr18	9708275	9862551	RAB31	+	2194.71	0.890808	0.242601	3.6719	0.000240755	0.00903631
chrX	31097677	33339609	DMD	-	6385.43	0.894826	0.271164	3.29994	0.000967055	0.0247715
chr20	10637684	10673999	JAG1	-	371.479	0.899318	0.295423	3.04417	0.00233322	0.0454034
chr17	1711447	1717174	MIR22HG	-	763.347	0.900037	0.275453	3.26748	0.0010851	0.0269673
chr2	144364364	144521057	ZEB2	-	812.085	0.903502	0.269052	3.3581	0.000784811	0.0213945
chr12	20368537	20688583	PDE3A	+	66609.1	0.903738	0.282996	3.19346	0.00140579	0.032245
chr10	99659509	99711241	ENTPD7	+	1817.93	0.907823	0.249309	3.64136	0.000271198	0.00989686
chr22	29767369	29770413	UQCR10	+	1680.51	0.910522	0.265556	3.42873	0.000606403	0.0177523
chr12	57738013	57750219	TSPAN31	+	479.804	0.913019	0.28285	3.22792	0.00124694	0.0296593
chr5	173056352	173139284	CREBRF	+	802.115	0.914425	0.287407	3.18164	0.00146445	0.0328703
chr8	43140464	43202855	HGSNAT	+	2403.01	0.9175	0.2384	3.84857	0.000118808	0.0053003
chr3	136818647	136855888	SLC35G2	+	610.359	0.918647	0.275118	3.33911	0.000840482	0.0224225
chr12	114670255	114684175	TBX3	-	1173.07	0.91923	0.265215	3.46598	0.000528295	0.0159154
chr20	5544439	5611006	GPCPD1	-	5181.65	0.922914	0.244099	3.7809	0.000156264	0.00640442
chr6	18387350	18468870	RNF144B	+	1202.9	0.925968	0.2706	3.42191	0.000621836	0.018066
chr9	99821855	99866891	NR4A3	+	1450.68	0.92621	0.255761	3.62139	0.000293025	0.0104557
chr2	36531805	36646087	FEZ2	-	2722.65	0.928312	0.263351	3.525	0.000423476	0.01371
chr14	99971449	100144236	EVL	+	2928.92	0.930382	0.249364	3.73101	0.00019071	0.00753467
chr4	111804418	112112273	LINC02945	-	7068.69	0.930773	0.292397	3.18325	0.0014563	0.0327959
chr10	58512872	58831435	BICC1	+	6781.1	0.931017	0.286347	3.25136	0.00114855	0.0282577
chr5	24487100	24644978	CDH10	-	10963.3	0.931249	0.299802	3.10621	0.00189499	0.0391255
chr15	71096952	71783383	THSD4	+	1975.05	0.933835	0.260961	3.57845	0.000345636	0.0116977
chr17	60677453	61392838	BCAS3	+	2790.51	0.93808	0.269814	3.47677	0.0005075	0.0153884
chr12	106301929	106347003	TCP11L2	+	355.575	0.942181	0.309666	3.04257	0.00234566	0.045426
chr8	126552443	126558478	LRATD2	-	683.731	0.943118	0.272778	3.45746	0.000545292	0.016322
chr1	207165496	207183910	C4BPAP1	+	357.006	0.943665	0.296477	3.18293	0.00145795	0.0327959
chr8	74320613	74518007	GDAP1	+	4763.59	0.943879	0.276428	3.41456	0.000638858	0.0183929
chr3	141876124	141926549	ATP1B3	+	15355.3	0.945514	0.232492	4.06687	4.76494e-05	0.00270081
chr5	73552190	73565667	ANKRA2	-	529.009	0.946696	0.291991	3.2422	0.00118609	0.028761
chr5	73626158	73941993	ARHGEF28	+	3166.26	0.947012	0.263826	3.58953	0.000331271	0.0113767
chr1	37474580	37484377	ZC3H12A	+	1039.87	0.948606	0.288139	3.29218	0.000994149	0.0253264
chr14	36677921	37172606	SLC25A21	-	2100.42	0.948803	0.281885	3.36592	0.000762895	0.0210762
chrX	17375200	17735994	NHS	+	12241.9	0.951503	0.238742	3.98549	6.73403e-05	0.00351754
chr18	24138987	24161600	CABYR	+	617.055	0.953466	0.269142	3.54261	0.000396192	0.0130534
chr12	50924969	50970700	ENSG00000289695	+	2912.06	0.953813	0.242481	3.93355	8.36999e-05	0.00405412
chr6	43037617	43053943	CUL7	-	2130.84	0.954086	0.283995	3.35952	0.000780792	0.0213697
chr6	75749201	75919537	MYO6	+	2013.9	0.955912	0.294235	3.2488	0.00115892	0.0283818
chr6	83193357	83198935	RWDD2A	+	371.847	0.958619	0.300028	3.19509	0.00139785	0.0321817
chr17	7402975	7404097	TMEM256	-	1000.67	0.959515	0.313162	3.06396	0.00218431	0.043241
chr3	178960121	179072215	ZMAT3	-	7666.67	0.964732	0.267575	3.60546	0.000311596	0.0109635
chr16	89919165	89936092	ENSG00000198211	+	718.6	0.96534	0.315235	3.06229	0.0021965	0.0433902
chr7	1530702	1543043	MAFK	+	2567.7	0.965555	0.319056	3.02629	0.00247577	0.0471246
chr5	52787916	52959209	ITGA1	+	6058.14	0.965635	0.240413	4.01656	5.90527e-05	0.00319193
chr16	56865207	56915850	SLC12A3	+	8732.97	0.966705	0.274033	3.52769	0.000419197	0.0136188
chr12	50923472	50932510	METTL7A	+	2941.39	0.968268	0.24238	3.99483	6.47394e-05	0.00342
chr6	25061626	25452263	CMAHP	-	1405.07	0.96991	0.269646	3.59697	0.000321945	0.0111799
chr3	36826819	36945057	TRANK1	-	608.675	0.972542	0.270201	3.59932	0.000319046	0.0111207
chr12	19129733	19376400	PLEKHA5	+	707.855	0.973918	0.290809	3.349	0.000811051	0.0219195
chr4	86924630	86936202	ENSG00000284968	-	372.87	0.975054	0.299893	3.25134	0.00114861	0.0282577
chr20	10172395	10308258	SNAP25	+	7615.88	0.97833	0.246714	3.96544	7.32602e-05	0.00371238
chr7	143279957	143288048	TMEM139	+	648.386	0.980434	0.279635	3.50613	0.000454679	0.0143709
chrX	16946658	17153272	REPS2	+	574.506	0.980645	0.275275	3.56242	0.00036745	0.0122361
chr17	60083562	60091885	WFDC21P	-	294.573	0.982811	0.311607	3.15401	0.00161043	0.0350638
chr4	39546336	39638902	SMIM14	-	1554.95	0.983044	0.250336	3.9269	8.60484e-05	0.0041109
chr1	110150494	110202202	SLC6A17	+	317.518	0.984571	0.318803	3.08833	0.00201282	0.0406922
chr8	144148016	144261927	MROH1	+	2281.48	0.985808	0.30735	3.20745	0.00133918	0.0311385
chr1	56494761	56645301	PLPP3	-	648.722	0.987396	0.267828	3.68668	0.000227201	0.0087075
chr12	106063345	106138954	NUAK1	-	578.113	0.987734	0.273082	3.61699	0.000298049	0.0105867
chr10	35126791	35212958	CREM	+	1226.07	0.989861	0.260773	3.79587	0.000147126	0.00610767
chr16	57610652	57665580	ADGRG1	+	512.892	0.991891	0.300309	3.3029	0.000956892	0.0245449
chr4	85475150	86002668	ARHGAP24	+	2996.96	0.995174	0.279787	3.5569	0.000375263	0.0124518
chr3	37381062	37440186	APRG1	+	640.388	0.997171	0.270657	3.68426	0.000229366	0.00874688
chr19	18153163	18170532	PIK3R2	+	2004.73	0.99737	0.328363	3.0374	0.00238629	0.0458413
chr12	80099537	80380880	OTOGL	+	786.333	0.998816	0.285545	3.49793	0.000468888	0.0145974
chr3	111732497	111976517	PHLDB2	+	7880.98	0.998979	0.255309	3.91283	9.12215e-05	0.00429228
chr5	96050115	96215519	MIR583HG	+	823.593	0.999301	0.305208	3.27417	0.00105974	0.0264199
chr3	174438573	175810548	NAALADL2	+	1837.49	1.00158	0.322912	3.10171	0.00192405	0.0392986
chr8	8234341	8244667	ALG1L13P	-	1363.13	1.00294	0.264461	3.7924	0.000149201	0.00616918
chr2	171522247	171558129	CYBRD1	+	2471.2	1.00754	0.252968	3.98287	6.80869e-05	0.00353672
chr3	186046314	186110318	ETV5	-	470.506	1.00851	0.282399	3.57124	0.0003553	0.0119675
chr18	3593732	3598363	DLGAP1-AS1	+	589.485	1.00857	0.275329	3.66312	0.000249158	0.009258
chr12	12891559	12917937	GPRC5A	+	4512.82	1.00859	0.232937	4.32987	1.492e-05	0.00104992
chr3	129087569	129122801	RAB43	-	302.956	1.01064	0.326893	3.09165	0.00199047	0.040434
chr12	57128483	57213361	LRP1	+	2872.91	1.0115	0.264306	3.82702	0.000129706	0.00566452
chr16	58059	76355	RHBDF1	-	706.637	1.01697	0.306736	3.31546	0.000914932	0.0237663
chr12	120210439	120265771	PXN	-	1620.94	1.01722	0.296859	3.4266	0.000611186	0.0178363
chr17	45221444	45247319	FMNL1	+	2743.55	1.01791	0.287052	3.54607	0.000391016	0.0129285
chrM	10059	10404	MT-ND3	+	4593.5	1.01819	0.280276	3.63283	0.000280325	0.0101308
chr3	4979437	4985323	BHLHE40	+	590.135	1.02317	0.317644	3.22111	0.00127693	0.030066
chr2	148021011	148516971	MBD5	+	6484.35	1.02356	0.302065	3.38854	0.000702669	0.0196747
chr2	237574322	237601614	RAB17	-	1872.09	1.02663	0.26193	3.91948	8.87384e-05	0.00419998
chr7	7968796	8094272	GLCCI1	+	5435.15	1.02704	0.287296	3.57484	0.000350437	0.0118387
chr1	185157080	185291781	SWT1	+	623.054	1.0282	0.282503	3.6396	0.000273063	0.00994548
chr9	116153791	116402321	PAPPA	+	4408.83	1.03167	0.2462	4.19037	2.78498e-05	0.00173693
chr12	53708517	53727745	CALCOCO1	-	1116.22	1.03939	0.283424	3.66726	0.000245166	0.00918044
chr15	94231538	94483952	MCTP2	+	6221.63	1.041	0.274728	3.78921	0.000151127	0.00623499
chr12	12357078	12471233	BORCS5	+	1723.93	1.04166	0.244846	4.25437	2.09639e-05	0.00136691
chr1	631074	632616	MTCO1P12	+	2707.61	1.04799	0.306928	3.41444	0.000639137	0.0183929
chr15	38252836	38357249	SPRED1	+	1084.25	1.05203	0.329925	3.18869	0.00142919	0.0325019
chr12	119989236	120094494	BICDL1	+	720.456	1.05379	0.267868	3.93397	8.35542e-05	0.00405412
chr2	23018125	23199056	ENSG00000232451	-	535.313	1.05501	0.324797	3.24823	0.00116127	0.0283818
chr1	230057990	230282122	GALNT2	+	11099.6	1.05545	0.229157	4.60582	4.10846e-06	0.000354697
chr2	131647990	131767404	C2orf27A	+	2814.12	1.0559	0.278071	3.79721	0.000146332	0.00609695
chr7	110662644	111562517	IMMP2L	-	95616.2	1.0568	0.291016	3.63142	0.00028187	0.0101669
chr5	173707614	173746279	LINC01484	-	901.333	1.06313	0.292934	3.62925	0.000284245	0.0102116
chr11	104942866	104969366	CASP4	-	951.434	1.06448	0.269677	3.94726	7.90516e-05	0.00387935
chr4	108742048	108763054	ETNPPL	-	591.783	1.06541	0.303997	3.50465	0.000457202	0.0144262
chr16	69703065	69704652	ENSG00000260772	+	251.913	1.06946	0.348686	3.06711	0.0021614	0.0428714
chr8	143553207	143563062	GSDMD	+	609.404	1.07084	0.336042	3.18664	0.00143935	0.032574
chr6	31114750	31140092	PSORS1C1	+	439.623	1.07358	0.313225	3.4275	0.000609164	0.0178052
chr1	209614870	209652425	LAMB3	-	2596.45	1.07402	0.282703	3.79909	0.00014523	0.00608594
chr14	54566117	54793315	SAMD4A	+	1887.22	1.07446	0.271546	3.95681	7.59559e-05	0.00378724
chr21	45073853	45226560	ADARB1	+	8138.73	1.07481	0.231481	4.64319	3.43063e-06	0.000300963
chr9	98199011	98255649	TBC1D2	-	567.292	1.07913	0.273189	3.95011	7.81145e-05	0.00385365
chr6	7726099	7881728	BMP6	+	5251.42	1.08263	0.235056	4.60583	4.10831e-06	0.000354697
chrX	108439838	108697545	COL4A5	+	20406.1	1.08514	0.253741	4.27655	1.89808e-05	0.00128244
chr11	1554051	1572271	DUSP8	-	649.358	1.08597	0.36016	3.01524	0.00256779	0.0484937
chr14	26599755	27295516	ENSG00000258081	+	9636.59	1.08751	0.30888	3.52082	0.000430222	0.0138324
chr18	3347696	3383532	LINC01895	-	1372.67	1.08925	0.248465	4.38391	1.16567e-05	0.00086603
chr7	141074064	141480380	TMEM178B	+	7712.46	1.08949	0.255381	4.26616	1.9887e-05	0.00132922
chr7	8113184	8262687	ICA1	-	323.466	1.09064	0.303719	3.59095	0.000329473	0.0113767
chr18	63476958	63505085	SERPINB5	+	886.515	1.09081	0.278879	3.91142	9.17552e-05	0.00429912
chr17	50184101	50201632	COL1A1	-	2973.52	1.09442	0.32952	3.32126	0.000896115	0.0235695
chr3	141228726	141367753	PXYLP1	+	553.986	1.09474	0.272926	4.01114	6.04264e-05	0.00324735
chr12	113422380	113438276	SDSL	+	288.137	1.09478	0.345144	3.17194	0.00151426	0.0336567
chr10	87751512	87841361	ATAD1	-	11531.3	1.09917	0.274241	4.00806	6.12205e-05	0.00328058
chr4	141636583	141733987	IL15	+	3564.93	1.10032	0.290888	3.78263	0.000155183	0.0063763
chr1	85482281	85578250	ENSG00000282057	-	375.927	1.10048	0.307091	3.58357	0.000338925	0.0115544
chr17	74862497	74873031	FDXR	-	1042.55	1.10496	0.317257	3.48287	0.000496077	0.0151158
chr11	95976598	96343195	MAML2	-	4085.71	1.106	0.282126	3.92024	8.84618e-05	0.00419754
chr8	8317736	8386439	PRAG1	-	1100.79	1.10781	0.260018	4.26051	2.03959e-05	0.00134873
chr8	48917598	48921740	SNAI2	-	578.23	1.11029	0.280267	3.96153	7.44725e-05	0.00374278
chr20	36306336	36528637	DLGAP4	+	509.965	1.11377	0.30829	3.61275	0.00030297	0.010688
chr16	88663298	88687282	SNAI3-AS1	+	426.885	1.11631	0.349556	3.19352	0.0014055	0.032245
chr12	56521820	56596193	RBMS2	+	2085.67	1.11855	0.25788	4.33747	1.4413e-05	0.00102978
chr7	116287380	116508541	CAV2	+	980.639	1.12299	0.280836	3.99873	6.36844e-05	0.00338344
chr8	80628451	80874781	ZNF704	-	1193.05	1.12331	0.271279	4.14079	3.46114e-05	0.00210239
chr2	25227855	25342590	DNMT3A	-	442.781	1.12489	0.306359	3.67182	0.000240833	0.00903631
chr1	248681249	248748349	ENSG00000286015	-	316.544	1.12544	0.324322	3.47014	0.000520184	0.0156964
chr22	29073035	29168333	KREMEN1	+	369.014	1.1257	0.331545	3.39533	0.000685458	0.0192506
chr5	102753981	103029730	PAM	+	11460.5	1.12782	0.26443	4.2651	1.99812e-05	0.00133075
chr8	75120409	75352327	CASC9	-	1765.79	1.1288	0.30886	3.65474	0.000257447	0.00948788
chr1	77888513	77943895	NEXN	+	655.517	1.13118	0.308528	3.66639	0.000245999	0.00919318
chr1	192809039	192812275	RGS2	+	1036.91	1.13371	0.261695	4.33219	1.47632e-05	0.00104679
chr5	66596380	67169593	MAST4	+	1293.53	1.13482	0.278124	4.08025	4.49871e-05	0.00258693
chr2	142877657	143055833	KYNU	+	19315.4	1.1382	0.273041	4.16862	3.06446e-05	0.00188601
chr17	68420948	68457513	WIPI1	-	707.329	1.14174	0.263394	4.33475	1.45928e-05	0.00103865
chr12	130953907	131141469	ADGRD1	+	1925.87	1.14214	0.252951	4.51528	6.32342e-06	0.000521766
chr7	111726110	112206407	DOCK4	-	4277.08	1.14956	0.272857	4.21304	2.51954e-05	0.00159811
chr2	101345550	101387503	CREG2	-	1128.06	1.15688	0.25735	4.49536	6.94527e-06	0.000564026
chr3	149377778	149386583	TM4SF1-AS1	+	150.641	1.15909	0.374107	3.09828	0.0019465	0.0396702
chr8	124450820	124462150	TRMT12	+	312.957	1.15976	0.306935	3.77851	0.000157768	0.00643778
chr7	140084746	140176983	KDM7A	-	677.482	1.16019	0.270786	4.28454	1.8312e-05	0.00125085
chr1	9148011	9198906	MIR34AHG	-	1184.84	1.16044	0.272428	4.25961	2.04781e-05	0.00134938
chrX	17528435	17587160	ENSG00000235834	+	1427.68	1.1617	0.252992	4.59185	4.39325e-06	0.000374088
chr5	173888349	173961980	CPEB4	+	11080.1	1.16446	0.256006	4.54858	5.40099e-06	0.000453683
chrM	9207	9990	MT-CO3	+	52585.2	1.16832	0.329083	3.55022	0.000384907	0.0127491
chr11	61258286	61295316	VWCE	-	436.998	1.16949	0.323506	3.61504	0.000300302	0.0106392
chr9	2421597	2622457	VLDLR-AS1	-	718.784	1.17004	0.295305	3.96214	7.42815e-05	0.00374278
chr10	86968432	86983934	ADIRF	+	272.538	1.17354	0.352885	3.32554	0.000882467	0.0233091
chr2	229357629	229714555	DNER	-	4766.88	1.17432	0.237015	4.95461	7.24773e-07	7.99738e-05
chr7	144451941	144836395	TPK1	-	5717.81	1.17561	0.2903	4.04963	5.12986e-05	0.00288138
chr8	140023724	140096538	ENSG00000289741	-	686.708	1.17913	0.264985	4.4498	8.59507e-06	0.00067629
chr12	52022832	52059507	NR4A1	+	1131.44	1.17945	0.368852	3.19761	0.0013857	0.0319809
chr11	118721104	118729412	ENSG00000287238	-	1081.36	1.18436	0.254118	4.66065	3.15211e-06	0.000280251
chr2	8678845	8684461	ID2	+	316.035	1.18532	0.314454	3.76946	0.000163604	0.0066468
chr15	38865322	39427195	ENSG00000259345	-	417.918	1.18957	0.297852	3.99382	6.50184e-05	0.00342504
chr16	370788	387113	PGAP6	-	555.604	1.19092	0.383534	3.10513	0.00190197	0.0391255
chr4	122826708	122898236	FGF2	+	1179.54	1.1913	0.289337	4.11736	3.83241e-05	0.0022906
chr5	158695916	159099916	EBF1	-	3112.93	1.19256	0.266902	4.46816	7.88943e-06	0.000628727
chr19	676392	683392	FSTL3	+	7922.89	1.19494	0.312977	3.81797	0.000134554	0.00580824
chr13	109269634	109278512	ENSG00000275216	+	726.424	1.19904	0.266804	4.49409	6.98681e-06	0.000564026
chr11	102317450	102339403	BIRC3	+	823.381	1.20064	0.299095	4.01423	5.96389e-05	0.0032143
chr17	45247916	45269824	MAP3K14-AS1	+	275.212	1.20552	0.316708	3.80642	0.000140992	0.00603031
chr1	185734391	186190949	HMCN1	+	144.581	1.20618	0.376417	3.20438	0.00135355	0.0313554
chr10	68477998	68527523	SLC25A16	-	4305.86	1.20643	0.234165	5.15206	2.57647e-07	3.40752e-05
chr19	6677704	6730562	C3	-	1363.18	1.21473	0.264988	4.5841	4.55951e-06	0.000386481
chr1	186296279	186314567	PRG4	+	223.005	1.21991	0.380684	3.20453	0.00135284	0.0313554
chr1	97394154	97420141	DPYD-IT1	-	145.492	1.22212	0.400381	3.05238	0.00227033	0.0444251
chr18	24725762	24986980	ENSG00000266573	+	618.425	1.22262	0.287173	4.25745	2.06774e-05	0.00135296
chr4	99816827	99870190	DAPP1	+	284.909	1.22373	0.343001	3.56773	0.000360094	0.0120557
chr3	10164919	10243745	IRAK2	+	174.453	1.2262	0.359724	3.40872	0.000652684	0.0185537
chr8	100337595	100350707	ENSG00000253217	+	556.852	1.23308	0.31517	3.91241	9.13789e-05	0.00429228
chr1	151841877	151850385	C2CD4D-AS1	+	256.215	1.23311	0.319514	3.85932	0.000113702	0.00516592
chr1	97077743	97995000	DPYD	-	8311.97	1.23553	0.305407	4.04552	5.22078e-05	0.00291489
chr7	27830573	28180795	JAZF1	-	495.031	1.23605	0.279191	4.42724	9.54487e-06	0.000738559
chr12	19775451	20012261	ENSG00000255910	+	1471.26	1.23848	0.306563	4.0399	5.34734e-05	0.00296778
chr2	225399710	225729887	NYAP2	+	3594.62	1.23944	0.297743	4.16279	3.14385e-05	0.00192301
chr16	66961245	66975149	CES3	+	1695.3	1.24024	0.251381	4.93371	8.06834e-07	8.74759e-05
chr11	124115404	124147721	VWA5A	+	268.364	1.2468	0.325578	3.8295	0.000128402	0.00563399
chr3	186930325	187078553	ST6GAL1	+	4179.63	1.24692	0.234903	5.30821	1.10705e-07	1.62553e-05
chr12	10158301	10172138	OLR1	-	1690.63	1.24692	0.265597	4.69478	2.66899e-06	0.000245179
chr5	172768096	172771195	DUSP1	-	3392.97	1.25009	0.285068	4.38524	1.15857e-05	0.000864204
chr12	13196723	13219941	EMP1	+	194.185	1.25019	0.347723	3.59535	0.000323957	0.0112289
chr5	132311285	132370170	MIR3936HG	-	3448.24	1.25399	0.257474	4.87037	1.11391e-06	0.000116046
chr5	321714	438291	AHRR	+	7676.26	1.25526	0.253306	4.9555	7.21428e-07	7.99738e-05
chr10	87862638	87971930	PTEN	+	19121.4	1.2566	0.283629	4.43044	9.40399e-06	0.00073069
chr12	9228533	9275817	A2MP1	-	270.604	1.26536	0.318604	3.97158	7.13973e-05	0.00363775
chr3	101222546	101320575	IMPG2	-	181.955	1.26916	0.376	3.37542	0.000737042	0.0204834
chrM	4470	5511	MT-ND2	+	2307.12	1.27299	0.385336	3.30358	0.0009546	0.0245198
chr15	66860303	66867023	ENSG00000277152	+	132.007	1.27476	0.423933	3.00698	0.00263859	0.0494425
chr6	9596110	10211608	OFCC1	-	179.016	1.27751	0.402813	3.17147	0.00151668	0.0336704
chr5	139846779	140043299	NRG2	-	797.655	1.27818	0.28037	4.55891	5.14205e-06	0.000433886
chr9	128191655	128255248	DNM1	+	180.042	1.27976	0.409642	3.12408	0.0017836	0.0376252
chr4	139716753	140154184	MAML3	-	790.269	1.27985	0.285699	4.47973	7.47385e-06	0.000598164
chr2	174431571	174487094	GPR155	-	2657.31	1.28508	0.250875	5.12238	3.01697e-07	3.90697e-05
chr11	86791059	86952910	PRSS23	+	7915.45	1.28598	0.231839	5.54688	2.90818e-08	4.71581e-06
chrX	141934496	142740581	ENSG00000288098	+	9496.82	1.28649	0.276958	4.64508	3.39949e-06	0.000300444
chr3	46130890	46266706	CCR3	+	160.607	1.28715	0.388233	3.31542	0.000915068	0.0237663
chr1	197268204	197478455	CRB1	+	3494.43	1.28965	0.272703	4.72914	2.25476e-06	0.000215624
chr2	96143169	96145440	DUSP2	-	2081.15	1.29016	0.34985	3.68774	0.000226253	0.00869933
chr14	73237497	73274640	PAPLN	+	552.324	1.29139	0.29681	4.35091	1.35576e-05	0.000991461
chr17	50866679	50910774	TOB1-AS1	+	212.019	1.29142	0.422933	3.0535	0.00226191	0.0443069
chr6	151656691	152129619	ESR1	+	2127.55	1.29146	0.264497	4.88272	1.04632e-06	0.000110236
chr19	44051367	44067999	ZNF223	+	168.503	1.2924	0.377691	3.42185	0.000621965	0.018066
chr20	44751808	44810546	RIMS4	-	157.408	1.29254	0.366972	3.52217	0.000428035	0.0137858
chr1	204218853	204377665	PLEKHA6	-	355.778	1.30139	0.299697	4.34235	1.40968e-05	0.00101107
chr11	64917553	64934475	PPP2R5B	+	388.703	1.30146	0.360259	3.61256	0.000303193	0.010688
chr1	37350934	37474432	ZC3H12A-DT	-	404.187	1.30193	0.29954	4.34644	1.38365e-05	0.00100398
chr14	49693105	49753150	KLHDC1	+	124.325	1.30543	0.393539	3.31716	0.000909388	0.0237663
chr2	38203363	38239590	ENSG00000227292	-	173.03	1.30573	0.36253	3.60172	0.00031612	0.0110393
chr4	128292751	128519398	LINC02615	+	1514.94	1.30997	0.274193	4.77755	1.77443e-06	0.000177901
chr21	44999208	45004727	PICSAR	-	262.715	1.311	0.372075	3.5235	0.000425891	0.0137643
chr6	19323428	19839080	LNC-LBCS	-	511.12	1.31223	0.303901	4.31796	1.5748e-05	0.00110402
chr7	43582758	43650713	STK17A	+	1716.97	1.31621	0.25541	5.15332	2.55909e-07	3.40752e-05
chr12	20014780	20098868	LINC02398	+	340.78	1.31736	0.354214	3.71912	0.000199916	0.00783199
chr17	69147214	69244846	ABCA10	-	437.515	1.3243	0.325516	4.06831	4.73544e-05	0.00269227
chr11	16777297	17014415	PLEKHA7	-	227.332	1.33131	0.33519	3.9718	7.13329e-05	0.00363775
chr9	35104112	35116341	FAM214B	-	549.464	1.33326	0.312012	4.2731	1.92776e-05	0.00129779
chr8	92699742	92879502	FLJ46284	-	218.475	1.33452	0.380375	3.50844	0.000450741	0.0143437
chr1	208022242	208244384	PLXNA2	-	216.194	1.33785	0.336769	3.9726	7.10921e-05	0.00363775
chr6	160272617	160276130	ENSG00000230234	+	166.794	1.34132	0.358949	3.73679	0.000186383	0.0074108
chr6	137867214	137883314	TNFAIP3	+	681.894	1.35109	0.270659	4.99185	5.98045e-07	6.88416e-05
chr9	98943179	99070792	COL15A1	+	2404.29	1.36	0.258498	5.26117	1.43142e-07	2.06924e-05
chr6	6885713	6887257	ENSG00000288860	+	181.448	1.36757	0.408741	3.34581	0.000820428	0.0220134
chrX	18989307	19122637	ADGRG2	-	1706.13	1.36798	0.244116	5.60381	2.09689e-08	3.52278e-06
chr17	45190931	45222222	FMNL1-DT	-	857.985	1.3683	0.310706	4.40386	1.06341e-05	0.000802856
chr16	89921392	89938761	TUBB3	+	333.668	1.37589	0.34585	3.97828	6.94145e-05	0.00358571
chr19	5904841	5914707	ENSG00000267314	+	172.351	1.37734	0.45009	3.06015	0.00221229	0.0435727
chr2	187464230	187565760	TFPI	-	3916.55	1.37785	0.28726	4.79652	1.61447e-06	0.000162738
chr12	46383433	46876784	SLC38A4-AS1	+	3478.75	1.38185	0.290175	4.76212	1.91566e-06	0.000188017
chr2	85598547	85603196	TMEM150A	-	174.751	1.38224	0.375845	3.67768	0.000235367	0.00893916
chr1	221701424	221742089	DUSP10	-	245.356	1.38517	0.331508	4.17839	2.93584e-05	0.00181368
chr3	4493345	4847506	ITPR1	+	44545.7	1.38722	0.229388	6.04748	1.47129e-09	3.26627e-07
chr11	123358428	123627774	GRAMD1B	+	8098.43	1.38776	0.236353	5.87155	4.31738e-09	8.38652e-07
chr7	124743885	124765792	GPR37	-	1366.93	1.38796	0.248145	5.59335	2.22734e-08	3.70853e-06
chr7	88270892	88306894	STEAP4	-	5787.46	1.38916	0.238903	5.81473	6.07311e-09	1.16551e-06
chr5	83940554	84384880	EDIL3	-	1436.91	1.38944	0.306975	4.52622	6.00488e-06	0.000497685
chr9	16409503	16870843	BNC2	-	5786.35	1.39093	0.277397	5.01423	5.32455e-07	6.32434e-05
chr1	6247353	6261098	GPR153	-	127.491	1.40596	0.415843	3.38098	0.000722277	0.0201331
chr14	70425812	70547464	ENSG00000257759	-	257.582	1.40748	0.335285	4.19785	2.69457e-05	0.00169186
chr21	38812878	38956467	ENSG00000205622	-	201.171	1.40829	0.371049	3.79543	0.000147386	0.00610767
chr1	78649796	78664078	IFI44	+	244.48	1.41213	0.393342	3.59007	0.000330595	0.0113767
chr3	53328963	53813733	CACNA1D	+	740.851	1.41499	0.26402	5.35939	8.35039e-08	1.28965e-05
chr11	111768668	111778364	ENSG00000254990	-	113.119	1.41514	0.410811	3.44475	0.000571596	0.0169727
chr11	95150539	95234391	LNCRNA-IUR	+	168.505	1.42055	0.361843	3.92587	8.64152e-05	0.0041109
chr7	138706294	138799560	ATP6V0A4	-	490.019	1.42304	0.279396	5.09328	3.51915e-07	4.46429e-05
chr17	40475828	40501623	TNS4	-	131.752	1.42858	0.415513	3.4381	0.000585815	0.0172843
chr10	18140424	18543557	CACNB2	+	15781.8	1.43093	0.251824	5.68228	1.32908e-08	2.31632e-06
chr1	70411218	70439851	CTH	+	4389.96	1.43236	0.242197	5.91405	3.3379e-09	6.70124e-07
chr5	710355	784729	ZDHHC11B	-	512.34	1.43349	0.286507	5.00335	5.63439e-07	6.56688e-05
chr1	168695874	169103296	ENSG00000285622	-	311.926	1.44751	0.361255	4.00688	6.15269e-05	0.00328754
chr21	15368966	15627342	ENSG00000229425	-	632.102	1.45215	0.304332	4.77159	1.82779e-06	0.000182271
chr6	137823673	137868233	WAKMAR2	-	90.6509	1.45215	0.441702	3.28762	0.00101038	0.0255653
chr9	17906563	18910950	ADAMTSL1	+	723.438	1.45381	0.320826	4.53145	5.85804e-06	0.000489869
chr16	84819985	84920768	CRISPLD2	+	410.01	1.45477	0.291764	4.98612	6.16024e-07	7.00101e-05
chr2	156324437	156342348	NR4A2	-	1148.67	1.45586	0.256521	5.6754	1.38362e-08	2.36713e-06
chr7	38239580	38249572	TRGC2	-	189.792	1.46312	0.357866	4.08847	4.34236e-05	0.00251479
chr7	94656325	94669695	PEG10	+	8563.01	1.46344	0.231592	6.31905	2.63179e-10	6.91233e-08
chr1	225447233	225465400	LINC02765	-	872.015	1.46792	0.307985	4.76621	1.87726e-06	0.000185847
chr1	150508062	150513789	ECM1	+	109.727	1.47285	0.422602	3.4852	0.000491766	0.0150275
chr8	123497889	123541206	FBXO32	-	193.783	1.4747	0.346791	4.25242	2.11473e-05	0.00137406
chr1	234261706	234274465	ENSG00000231272	+	98.328	1.48005	0.428023	3.45789	0.000544433	0.016322
chr3	155024124	155183704	MME	+	4745.82	1.48152	0.257686	5.74931	8.9608e-09	1.66144e-06
chr11	78215293	78418348	GAB2	-	522.745	1.48998	0.285414	5.22042	1.78516e-07	2.52195e-05
chr15	87325829	87703852	ENSG00000259560	-	226.726	1.49086	0.342939	4.34731	1.37819e-05	0.00100392
chr7	23235967	23275108	GPNMB	+	1404	1.49172	0.247682	6.02273	1.71502e-09	3.68862e-07
chr5	125333369	126368755	ENSG00000248752	-	434.099	1.49979	0.316289	4.74183	2.11799e-06	0.00020571
chr1	168903905	169087005	LINC00970	-	243.579	1.50081	0.359107	4.17928	2.92434e-05	0.00181368
chr10	60026298	60733490	ANK3	-	102.908	1.51469	0.441065	3.43417	0.000594378	0.0174551
chr2	191834310	191847088	CAVIN2	-	91.0172	1.52359	0.454269	3.35393	0.000796718	0.0216262
chr15	82659281	82710112	AP3B2	-	181.413	1.52819	0.362462	4.21614	2.48523e-05	0.00158173
chr1	916865	921016	LINC02593	-	132.654	1.52954	0.465752	3.28403	0.00102335	0.0257885
chr2	39168045	39243983	CDKL4	-	81.9146	1.52987	0.458779	3.33466	0.000854042	0.0227192
chr4	78551747	78610451	ANXA3	+	583.277	1.53039	0.29341	5.21589	1.82939e-07	2.565e-05
chr10	123356450	123537767	LINC02641	+	117.821	1.53155	0.405767	3.77445	0.000160361	0.00652929
chr17	68267026	68291267	SLC16A6	-	1247.76	1.53296	0.269996	5.67769	1.36528e-08	2.35738e-06
chr16	27313668	27364778	IL4R	+	98.0464	1.53461	0.474474	3.23434	0.00121925	0.0291868
chr12	46537502	46652550	ENSG00000272369	+	653.681	1.53754	0.328377	4.68223	2.83771e-06	0.000258135
chr18	54717860	54895516	RAB27B	+	1063.27	1.53861	0.308335	4.99006	6.03607e-07	6.90556e-05
chr7	76090431	76108779	GTF2IP7	-	140.292	1.53953	0.386741	3.98077	6.86931e-05	0.0035583
chr17	1633858	1645744	SCARF1	-	120.618	1.5567	0.433821	3.58835	0.000332774	0.0114053
chr17	9822206	9892099	GLP2R	+	3439.26	1.56003	0.235535	6.62337	3.51103e-11	1.07334e-08
chr2	131591752	131628147	POTEKP	+	1963.03	1.56523	0.274187	5.70862	1.13897e-08	2.0228e-06
chr9	34366666	34376898	MYORG	-	387.962	1.56817	0.333641	4.70016	2.59957e-06	0.000241178
chr5	16473038	16617101	RETREG1	-	641.121	1.56999	0.293183	5.35497	8.55692e-08	1.30795e-05
chr1	46175073	46185962	TSPAN1	+	135.236	1.57265	0.393609	3.99546	6.45679e-05	0.00342
chr2	28956611	29052230	TOGARAM2	+	471.316	1.57335	0.294123	5.3493	8.82973e-08	1.33867e-05
chr20	34704339	34713439	TP53INP2	+	118.323	1.57653	0.440026	3.58281	0.000339916	0.0115619
chr8	56300005	56320776	SDR16C5	-	228.113	1.58596	0.352072	4.50465	6.64811e-06	0.00054614
chr2	11372612	11403175	LINC00570	+	86.8016	1.58606	0.469525	3.37801	0.000730121	0.0203213
chr9	110365248	110579880	SVEP1	-	1085.46	1.58846	0.275494	5.76584	8.12517e-09	1.53049e-06
chr5	96390333	96434143	PCSK1	-	8027.27	1.58847	0.240305	6.61022	3.83747e-11	1.15421e-08
chr21	36445731	36532408	CLDN14-AS1	+	66.4135	1.5915	0.505963	3.14549	0.00165806	0.0359948
chr7	95035731	95214338	PPP1R9A-AS1	-	381.341	1.59254	0.3287	4.84497	1.26632e-06	0.000130466
chrX	49187815	49200218	SYP	-	64.3987	1.59298	0.52447	3.03732	0.00238695	0.0458413
chr1	229087114	229205428	LINC02814	-	64.7197	1.59486	0.509297	3.13148	0.00173925	0.0368563
chrX	153687926	153696588	SLC6A8	+	74.8295	1.60331	0.523943	3.06008	0.00221275	0.0435727
chr11	118226690	118252365	MPZL3	-	333.188	1.60908	0.312609	5.14726	2.64325e-07	3.47122e-05
chr10	1957589	1960190	ENSG00000287653	+	158.023	1.62166	0.420836	3.85341	0.000116484	0.00523422
chr12	95657807	95791189	NTN4	-	1399.25	1.63167	0.2651	6.15492	7.51144e-10	1.79581e-07
chr22	37180166	37199385	C1QTNF6	-	3427.88	1.63689	0.266896	6.13307	8.61984e-10	2.00928e-07
chrX	108155607	108439497	COL4A6	-	1432.5	1.64198	0.253014	6.48967	8.6022e-11	2.43051e-08
chr5	21616262	21779522	ENSG00000253766	+	242.098	1.65312	0.350442	4.71723	2.39072e-06	0.000224046
chr4	89410960	89726752	ENSG00000251095	+	81.7802	1.65636	0.527973	3.13721	0.00170561	0.0365565
chr13	113815630	113845744	GAS6-AS1	+	132.272	1.66452	0.46177	3.60466	0.000312568	0.010977
chr1	210328252	210676296	HHAT	+	709.297	1.66663	0.269769	6.178	6.49179e-10	1.57219e-07
chr19	589881	617159	HCN2	+	571.365	1.67026	0.363131	4.59962	4.2327e-06	0.000363739
chr4	15935577	15938740	FGFBP1	-	75.3302	1.67729	0.500174	3.35342	0.000798195	0.0216348
chr1	246724409	246768137	SCCPDH	+	617.897	1.68518	0.274444	6.14036	8.23363e-10	1.94355e-07
chr8	100475667	100501148	ENSG00000253666	+	147.134	1.68572	0.393637	4.28241	1.84879e-05	0.00125368
chr12	10372353	10410146	KLRC4-KLRK1	-	140.097	1.69455	0.439205	3.85823	0.000114213	0.00516951
chr12	51590266	51812864	SCN8A	+	305.45	1.69893	0.313503	5.41917	5.98775e-08	9.46267e-06
chr2	96145602	96147012	ENSG00000228873	-	141.777	1.7091	0.44689	3.82442	0.000131082	0.00571124
chr5	39371675	39462300	DAB2	-	5859.47	1.7234	0.258819	6.65872	2.76215e-11	8.73025e-09
chr5	39331773	39424868	ENSG00000289699	-	5914.07	1.72517	0.259527	6.64736	2.98405e-11	9.27443e-09
chr5	173911682	173912938	ENSG00000289085	+	142.87	1.72936	0.384794	4.49425	6.98158e-06	0.000564026
chrX	23783278	23783367	ENSG00000288706	+	88.2009	1.73961	0.46677	3.7269	0.000193846	0.00762624
chr4	171812254	173041559	GALNTL6	+	544.937	1.74213	0.284734	6.11846	9.44868e-10	2.1753e-07
chr6	55753653	55875590	BMP5	-	270.469	1.74892	0.371757	4.70447	2.54523e-06	0.000237317
chr12	116856144	116881441	HRK	-	51.9055	1.76021	0.57144	3.0803	0.0020679	0.0412871
chr2	33436324	33564750	RASGRP3	+	103.673	1.76305	0.427339	4.12564	3.69704e-05	0.0022168
chr11	74235801	74311640	P4HA3	-	58.5693	1.76711	0.541775	3.26171	0.00110744	0.0273894
chr13	66302834	67230445	PCDH9	-	762.484	1.77334	0.347879	5.09758	3.44017e-07	4.39399e-05
chr16	53035690	53052897	ENSG00000277639	-	152.133	1.77369	0.377612	4.69713	2.63842e-06	0.00024357
chr17	8063936	8072533	ALOXE3P1	+	72.3026	1.79181	0.490167	3.65551	0.000256672	0.00948788
chr6	113969701	114471705	HDAC2-AS2	+	249.953	1.79302	0.336961	5.32115	1.03113e-07	1.55069e-05
chr16	15434475	15625028	BMERB1	+	185.948	1.79822	0.371998	4.83396	1.33844e-06	0.000135648
chr17	75587800	75626849	MYO15B	+	174.461	1.80329	0.41894	4.3044	1.67435e-05	0.00116941
chr18	23957754	23982556	LINC02958	-	784.121	1.80835	0.264176	6.84524	7.6348e-12	2.77842e-09
chr21	36430360	36481070	ENSG00000230479	+	52.1411	1.81394	0.563728	3.21776	0.00129194	0.0303677
chr11	1571353	1599184	KRTAP5-AS1	+	486.085	1.81966	0.307695	5.91385	3.342e-09	6.70124e-07
chr10	69220332	69267552	HKDC1	+	182.101	1.8213	0.363797	5.00636	5.54686e-07	6.51603e-05
chr6	35220370	35224630	ENSG00000272374	-	96.0545	1.82144	0.446467	4.07968	4.50977e-05	0.00258693
chr19	47403124	47419527	MEIS3	-	178	1.82163	0.43068	4.22967	2.34039e-05	0.00150495
chrX	153735626	153766478	PLXNB3-AS1	-	52.238	1.82268	0.554557	3.28674	0.00101354	0.0256105
chr3	54122547	55074557	CACNA2D3	+	2546.27	1.82498	0.266794	6.84041	7.89663e-12	2.77842e-09
chr19	18607430	18621039	TMEM59L	+	61.3912	1.82837	0.585747	3.12143	0.00179976	0.0378603
chr8	123178960	123210079	FAM83A	+	53.7051	1.84495	0.562563	3.27954	0.00103977	0.026077
chr5	39284140	39371324	C9	-	79.4408	1.84574	0.484281	3.81131	0.000138235	0.00593964
chr18	47912207	47912504	ENSG00000279366	-	43.8548	1.84693	0.608265	3.0364	0.00239424	0.045934
chr4	1793293	1808872	FGFR3	+	282.326	1.85092	0.382354	4.84084	1.29288e-06	0.000132471
chr2	131637025	131649615	LINC01087	+	866.429	1.85758	0.290873	6.3862	1.70053e-10	4.59587e-08
chr14	61187559	61550976	PRKCH	+	41.0723	1.8766	0.620775	3.023	0.00250282	0.047528
chr6	150599883	150843665	PLEKHG1	+	445.388	1.87755	0.300295	6.25234	4.04342e-10	1.01894e-07
chr19	47332175	47347329	C5AR2	+	1723.9	1.88342	0.259789	7.24982	4.17335e-13	1.80988e-10
chr21	26917922	26967088	ADAMTS5	-	772.757	1.8879	0.279984	6.74288	1.55276e-11	4.99239e-09
chr1	71794232	71837012	NEGR1-IT1	-	119.691	1.89045	0.46211	4.09091	4.29682e-05	0.00249617
chr8	101686542	102124907	NCALD	-	48.9192	1.90012	0.584743	3.24949	0.00115611	0.0283672
chr7	20330702	20415754	ITGB8	+	1797.51	1.90251	0.289812	6.56463	5.2163e-11	1.54402e-08
chr6	10429255	10435015	LINC00518	-	46.0556	1.91072	0.602673	3.17041	0.00152222	0.033753
chr1	71395943	72282539	NEGR1	-	10353	1.91408	0.315856	6.05997	1.3615e-09	3.09625e-07
chr1	95510059	95782342	LINC02607	+	88.685	1.91767	0.504277	3.80281	0.000143061	0.00604368
chr10	88935074	88991339	ACTA2	-	379.765	1.92487	0.304556	6.32027	2.61101e-10	6.91233e-08
chr21	43322417	43332039	LINC00322	-	467.672	1.92548	0.326705	5.89362	3.77831e-09	7.41662e-07
chr17	80169992	80209331	CARD14	+	2006.3	1.93406	0.301375	6.41746	1.38571e-10	3.85681e-08
chrX	40262917	40299061	ENSG00000236393	+	59.2933	1.94003	0.529711	3.66244	0.000249821	0.00926175
chr1	186671791	186680922	PTGS2	-	44.6862	1.95017	0.597847	3.26199	0.00110633	0.0273894
chr6	21664184	22654455	CASC15	+	100.145	1.95049	0.446049	4.37281	1.22659e-05	0.000904089
chr11	102862736	102874982	MMP12	-	2823.67	1.9512	0.248946	7.83784	4.58364e-15	2.75728e-12
chrX	23783173	23786210	SAT1	+	1560.3	1.95463	0.245424	7.96429	1.66176e-15	1.03295e-12
chr6	116494989	116545684	TRAPPC3L	-	160.191	1.96467	0.386337	5.08539	3.66875e-07	4.62262e-05
chr7	137381037	137847092	DGKI	-	123.947	1.9672	0.423711	4.64277	3.43765e-06	0.000300963
chr1	231626790	232041272	DISC1	+	76.3619	1.97196	0.489369	4.02959	5.5875e-05	0.00305559
chr4	188091272	188109603	TRIML2	-	905.501	1.97492	0.271382	7.27728	3.40613e-13	1.54921e-10
chr12	10412312	10436001	ENSG00000255641	-	207.636	1.98011	0.384057	5.15577	2.52593e-07	3.38874e-05
chr11	57484534	57515780	SLC43A1	-	927.691	1.98431	0.290019	6.84202	7.80843e-12	2.77842e-09
chr12	9067664	9116229	A2M	-	147.134	1.98443	0.390739	5.07867	3.8009e-07	4.757e-05
chr5	43376645	43412391	CCL28	-	327.861	1.99087	0.321945	6.18389	6.25408e-10	1.53455e-07
chr2	215611563	215848954	LINC00607	-	38.5779	1.99474	0.647573	3.08033	0.00206772	0.0412871
chr2	39786453	40255209	SLC8A1-AS1	+	66.453	2.00698	0.537572	3.73342	0.000188899	0.00747896
chr17	28364288	28368012	ENSG00000273171	-	1676.79	2.02193	0.297318	6.80054	1.04225e-11	3.53379e-09
chr6	4304942	4583871	ENSG00000285424	-	83.6348	2.02799	0.506899	4.00078	6.31329e-05	0.00336372
chr12	80402178	80680273	PTPRQ	+	146.778	2.03598	0.407115	5.00099	5.70356e-07	6.60621e-05
chr18	3962353	4024150	DLGAP1-AS4	+	42.5874	2.04349	0.608806	3.35655	0.000789204	0.0214535
chr12	10412315	10420595	KLRC3	-	170.361	2.05709	0.405931	5.06759	4.02878e-07	4.97541e-05
chr19	43460787	43465608	LYPD3	-	754.651	2.06086	0.292577	7.04382	1.87043e-12	7.58255e-10
chr12	87782163	87784568	MKRN9P	-	212.967	2.06173	0.342356	6.02218	1.72088e-09	3.68862e-07
chr17	28367284	28373091	VTN	-	5197.1	2.07408	0.297805	6.96455	3.2945e-12	1.25379e-09
chr4	108808725	109302752	COL25A1	-	191.549	2.0804	0.383094	5.43051	5.61932e-08	8.95632e-06
chr13	67121081	67156624	ENSG00000285588	+	188.143	2.08963	0.454919	4.59341	4.3606e-06	0.000373012
chr8	142670308	142682725	PSCA	+	90.5819	2.09229	0.481806	4.34259	1.4081e-05	0.00101107
chr17	40921430	40975926	ENSG00000234477	+	44.0345	2.09683	0.61369	3.41676	0.00063371	0.0182932
chrX	11117651	11665920	ARHGAP6	-	160.82	2.12057	0.406699	5.2141	1.84711e-07	2.57052e-05
chr14	52111122	52129625	LINC02319	-	45.5709	2.12452	0.607965	3.49447	0.000475008	0.0147387
chr5	144856890	145228982	ENSG00000251031	-	183.951	2.14298	0.385399	5.56042	2.69121e-08	4.44121e-06
chr1	15490832	15526534	CASP9	-	1593.8	2.15894	0.276081	7.81998	5.28335e-15	3.07887e-12
chr2	37489453	37605384	ENSG00000289545	+	47.4045	2.16	0.706916	3.05552	0.00224667	0.044101
chr5	659862	693352	TPPP	-	309.333	2.16743	0.361917	5.98874	2.11469e-09	4.48122e-07
chr14	70453541	70483775	ADAM20P1	-	42.4592	2.17858	0.622702	3.49859	0.000467725	0.0145855
chr18	23598926	23662911	ANKRD29	-	330.219	2.18129	0.322491	6.76387	1.34357e-11	4.39558e-09
chr4	94757955	95158448	BMPR1B	+	718.757	2.1817	0.33392	6.5336	6.42077e-11	1.87085e-08
chr14	38738155	38948273	LINC00639	-	37.13	2.18426	0.67611	3.23063	0.0012352	0.029489
chr3	189631389	189897276	TP63	+	204.733	2.19499	0.389724	5.63218	1.77945e-08	3.01666e-06
chr1	200478020	200483604	ENSG00000282849	-	51.4335	2.19659	0.566574	3.87698	0.000105762	0.00483397
chrX	70120353	70121474	MTCYBP31	-	48.3276	2.20712	0.691855	3.19015	0.00142201	0.0324971
chr1	230314490	230426332	PGBD5	-	61.7962	2.21496	0.544898	4.0649	4.80527e-05	0.00271541
chr17	80824170	80826900	ENSG00000287403	-	39.5366	2.21711	0.645543	3.43449	0.000593681	0.0174551
chr6	36676460	36687337	CDKN1A	+	1458.29	2.22823	0.267345	8.33467	7.7717e-17	6.03861e-14
chr2	206175316	206218047	CMKLR2	-	71.2118	2.22889	0.505992	4.40499	1.05791e-05	0.000801945
chr19	43192702	43207299	PSG4	-	110.283	2.23633	0.429794	5.20326	1.95824e-07	2.70499e-05
chr2	176989418	177164656	ENSG00000236501	-	72.8255	2.23714	0.555572	4.02673	5.65585e-05	0.00308393
chr20	6767686	6780246	BMP2	+	7155.05	2.24154	0.234168	9.57235	1.04508e-21	1.39204e-18
chr9	92141298	92160114	LINC00475	+	31.5476	2.25322	0.705651	3.1931	0.00140752	0.032245
chr5	174336295	174532457	LINC01411	+	148.896	2.25783	0.382724	5.89937	3.649e-09	7.23899e-07
chr17	40850800	40863282	ENSG00000265359	+	173.795	2.2642	0.381931	5.92831	3.06068e-09	6.41299e-07
chr1	53506237	53739164	GLIS1	-	965.554	2.27156	0.261953	8.67162	4.26021e-18	4.18128e-15
chr8	94925972	94949378	TP53INP1	-	741.562	2.27312	0.284024	8.00326	1.21171e-15	7.79171e-13
chr22	32801705	32863041	TIMP3	+	63.2323	2.2814	0.589534	3.86983	0.000108912	0.00496573
chr7	18086949	19002416	HDAC9	+	206.654	2.28414	0.377281	6.05421	1.41107e-09	3.17031e-07
chr12	14880864	14885857	MGP	-	476.68	2.29444	0.338536	6.77753	1.22244e-11	4.07074e-09
chr5	134926660	134928036	MTND4P12	-	128.336	2.29737	0.595639	3.85698	0.000114797	0.00517088
chr3	49554477	49671549	BSN	+	47.5008	2.31286	0.608027	3.80387	0.000142452	0.00604368
chr7	38257879	38265678	TRGC1	-	1600.64	2.32474	0.254005	9.15237	5.56989e-20	6.92449e-17
chr3	28349178	29767537	ENSG00000283563	+	783.619	2.32816	0.363599	6.40311	1.52246e-10	4.17513e-08
chr8	19901717	19967259	LPL	+	8474.92	2.33439	0.24038	9.71124	2.70043e-22	3.87367e-19
chr10	52314281	52318042	DKK1	+	314.527	2.33811	0.324663	7.20166	5.94822e-13	2.52096e-10
chr7	117363222	117428123	ASZ1	-	45.387	2.35001	0.748656	3.13897	0.0016954	0.0364603
chr1	77881348	77889539	NEXN-AS1	-	51.819	2.37299	0.580007	4.09132	4.28927e-05	0.00249617
chr7	38259643	38273636	TARP	-	2035.17	2.37845	0.261482	9.09604	9.36845e-20	1.09189e-16
chr15	47812729	48050507	ENSG00000259754	+	940.864	2.37954	0.293026	8.12058	4.63949e-16	3.20434e-13
chr7	31751179	32428131	PDE1C	-	49.3133	2.37978	0.590033	4.0333	5.49992e-05	0.00302544
chr2	40097270	40611053	SLC8A1	-	90.8259	2.38043	0.478016	4.97981	6.36471e-07	7.14995e-05
chr1	78303884	78540701	PTGFR	+	26.7633	2.38865	0.779917	3.06269	0.00219355	0.0433778
chr1	89006679	89022894	GBP3	-	44.1813	2.39678	0.639107	3.7502	0.000176691	0.00708589
chr2	227871054	227924344	DAW1	+	67.6077	2.3974	0.514419	4.6604	3.15597e-06	0.000280251
chr2	74518131	74526281	DQX1	-	90.1759	2.42786	0.467583	5.19237	2.0763e-07	2.8449e-05
chr9	136994608	136996568	CLIC3	-	47.2191	2.45583	0.627994	3.91059	9.20693e-05	0.00430303
chr15	47956521	47988044	ENSG00000287439	-	25.3062	2.48764	0.786638	3.16237	0.00156489	0.0343635
chr6	31765590	31777328	VWA7	-	110.72	2.50917	0.531916	4.71722	2.39088e-06	0.000224046
chr1	108712908	108742749	FNDC7	+	41.853	2.51505	0.633819	3.96809	7.24502e-05	0.00368134
chr4	101411286	102074812	BANK1	+	32.0237	2.51969	0.731547	3.44432	0.000572492	0.0169727
chr15	98880659	98893535	ENSG00000259621	-	264.089	2.53295	0.339009	7.47162	7.92118e-14	3.78754e-11
chr2	37562486	37646698	ENSG00000236213	+	38.5921	2.54139	0.684772	3.7113	0.000206201	0.00801022
chr18	54901509	54959461	CCDC68	-	220.744	2.5476	0.363911	7.00062	2.54841e-12	1.01112e-09
chr12	14942031	14961728	ARHGDIB	-	107.445	2.56743	0.433669	5.92025	3.21458e-09	6.58742e-07
chr7	151428832	151440813	CRYGN	-	40.7946	2.57078	0.661295	3.8875	0.000101283	0.00466353
chr2	144666312	145262988	TEX41	+	59.7444	2.58571	0.575701	4.49142	7.07503e-06	0.000568686
chr5	1008802	1038943	NKD2	+	347.564	2.58614	0.453928	5.69724	1.21761e-08	2.14207e-06
chr10	69215333	69232490	ENSG00000229261	-	24.7249	2.59613	0.804624	3.22652	0.00125305	0.0297289
chr12	57010000	57028883	TAC3	-	294.247	2.59888	0.347722	7.474	7.77905e-14	3.78754e-11
chr14	53685139	53850882	LINC02331	-	36.8945	2.63664	0.674372	3.90977	9.23832e-05	0.0043069
chr7	81489204	81691406	ENSG00000233491	-	51.8576	2.65905	0.623615	4.26392	2.00867e-05	0.00133302
chr12	71125085	71441898	TSPAN8	-	190.906	2.6678	0.408485	6.53096	6.53484e-11	1.8748e-08
chr6	106360717	106572017	CRYBG1	+	24.5937	2.71985	0.818821	3.32167	0.000894807	0.0235683
chrX	23772992	23782956	ENSG00000233785	-	53.5072	2.73517	0.648435	4.21812	2.46352e-05	0.00157869
chr3	133824235	133895882	RAB6B	-	62.5429	2.74527	0.56013	4.90112	9.52911e-07	0.000102126
chr19	18374731	18389176	GDF15	+	376.38	2.74605	0.36692	7.48405	7.20671e-14	3.63218e-11
chr21	26393635	26569252	CYYR1-AS1	+	318.386	2.75216	0.343368	8.0152	1.09954e-15	7.32293e-13
chr20	35558737	35607562	FER1L4	-	21.6109	2.77226	0.869284	3.18913	0.001427	0.0325019
chr1	11066618	11099869	EXOSC10	-	14097.6	2.77325	0.242329	11.4442	2.51542e-30	5.21194e-27
chr2	37466781	37524807	ENSG00000287316	+	26.695	2.77804	0.863818	3.216	0.00129989	0.0304527
chr1	184387029	184629019	C1orf21	+	138.793	2.85877	0.473118	6.04241	1.5183e-09	3.33097e-07
chr1	78229599	78369464	MGC27382	+	32.2704	2.89676	0.761393	3.80455	0.00014206	0.00604368
chr2	136765545	137677718	THSD7B	+	20.6441	2.90306	0.941914	3.08208	0.00205557	0.0412618
chr12	10372353	10391874	KLRK1	-	25.0914	2.92917	0.826654	3.5434	0.000395002	0.0130372
chr21	26378552	26471698	ENSG00000232692	+	293.017	2.93698	0.348502	8.42744	3.5332e-17	2.86466e-14
chr22	50089879	50161690	MOV10L1	+	39.4589	2.95849	0.683155	4.33063	1.48683e-05	0.00104992
chr3	178419123	178843300	ENSG00000275163	+	21.77	2.99426	0.902532	3.31762	0.000907867	0.0237663
chr6	116529013	116561127	CALHM4	+	37.3368	2.99584	0.712606	4.20405	2.62176e-05	0.00165171
chr7	110108031	110534757	ENSG00000226965	-	222.066	3.0056	0.38812	7.744	9.63354e-15	5.28371e-12
chr3	178272932	178844429	KCNMB2	+	22.1274	3.01956	0.899291	3.35772	0.000785889	0.0213945
chr17	41619442	41624842	KRT17	-	1007.53	3.039	0.302896	10.0331	1.08997e-23	1.69381e-20
chr5	161847063	161899981	GABRA1	+	322.415	3.04529	0.353876	8.60555	7.59525e-18	7.08181e-15
chr14	62699464	63102037	KCNH5	-	307.593	3.04897	0.391213	7.79362	6.51158e-15	3.67963e-12
chr6	74530248	74734319	ENSG00000272243	-	19.8923	3.17947	0.951734	3.34071	0.00083565	0.0223575
chr8	119416446	119424434	CCN3	+	122.051	3.22459	0.452598	7.12461	1.04374e-12	4.32526e-10
chr12	117099481	117142091	TESC-AS1	+	19.1137	3.2356	1.0431	3.10191	0.0019228	0.0392986
chr8	143419182	143430732	MAFA	-	59.474	3.2575	0.637595	5.10905	3.2379e-07	4.16416e-05
chr5	128257909	128659185	FBN2	-	23.9379	3.26516	0.863735	3.78028	0.000156653	0.00640629
chr12	57028517	57051198	MYO1A	-	1362.53	3.2766	0.294959	11.1087	1.13852e-28	1.93011e-25
chr5	39520398	39524726	LINC02104	+	29.2157	3.28635	0.795242	4.13252	3.58813e-05	0.00217245
chr5	24135160	24271863	ENSG00000286134	-	20.9982	3.30425	0.961185	3.43768	0.00058671	0.0172843
chr17	41500981	41505705	KRT13	-	33.2437	3.35471	0.76574	4.38101	1.1813e-05	0.000874161
chr3	150308236	150331009	ENSG00000289524	-	20.4364	3.35965	0.965629	3.47924	0.000502841	0.015272
chr22	32583300	32584204	SYN3-AS1	+	70.6068	3.38227	0.588364	5.7486	8.99858e-09	1.66144e-06
chr2	190343570	190371665	INPP1	+	14.6145	3.39109	1.10075	3.08071	0.00206511	0.0412871
chr1	218912757	218918714	LINC01710	-	51.5089	3.40811	0.6451	5.28307	1.27034e-07	1.85073e-05
chr2	223596940	223602361	SCG2	-	52.7959	3.40899	0.636123	5.35901	8.36806e-08	1.28965e-05
chr12	70515870	70637440	PTPRB	-	26.3723	3.45241	0.856693	4.02993	5.57934e-05	0.00305559
chr15	51208057	51338601	CYP19A1	-	16.6887	3.47256	1.10758	3.13527	0.00171696	0.0366338
chr4	109731008	109802150	CFI	-	95.0457	3.49394	0.511446	6.8315	8.40331e-12	2.90194e-09
chr21	41175231	41186788	PLAC4	-	1976.14	3.52237	0.288097	12.2263	2.24904e-34	5.99145e-31
chr16	4882507	4960741	PPL	-	2196.64	3.6588	0.274296	13.3389	1.37501e-40	4.27354e-37
chr2	162170684	162245151	FAP	-	88.7672	3.69497	0.596043	6.19917	5.67623e-10	1.41134e-07
chr2	37617328	37661861	ENSG00000290100	+	16.3539	3.69632	1.14685	3.22301	0.00126849	0.0299429
chr1	11068471	11073097	ENSG00000226849	+	103.225	3.73396	0.491797	7.59249	3.13807e-14	1.67196e-11
chr19	42752686	42855691	PSG8	-	13.8421	3.77951	1.2316	3.06878	0.00214932	0.0426842
chr3	178419201	178457309	LINC01014	+	15.8561	3.98014	1.18335	3.36345	0.000769739	0.0212025
chrM	3230	3304	MT-TL1	+	33.7628	3.9912	0.99196	4.02355	5.73273e-05	0.00311673
chr8	22114419	22133384	HR	-	148.516	4.00492	0.489363	8.18394	2.7471e-16	1.97031e-13
chr4	176213673	176277571	ASB5	-	15.3282	4.25799	1.22363	3.47979	0.000501802	0.0152653
chr3	161600438	161735399	ENSG00000288087	+	2648.45	4.41275	0.294292	14.9945	7.97749e-51	3.71911e-47
chr16	66366622	66404784	CDH5	+	64.1132	4.44112	0.648492	6.84838	7.46886e-12	2.77842e-09
chr8	105546089	106060524	ZFPM2-AS1	-	93.6223	4.45076	0.587302	7.5783	3.50106e-14	1.81355e-11
chr3	28574791	30010391	RBMS3	+	590.737	4.55701	0.38856	11.7279	9.16691e-32	2.13681e-28
chr8	96645242	97149654	CPQ	+	17.9031	4.57065	1.21492	3.76209	0.000168497	0.00681589
chrX	27042907	27176298	ENSG00000242021	-	18.1304	4.5923	1.20563	3.80906	0.000139497	0.00598009
chr2	213188417	213201737	ENSG00000289002	+	19.6867	4.63004	1.16915	3.96019	7.48909e-05	0.00374414
chr4	74445136	74455005	AREG	+	43.6456	4.86994	0.85238	5.71335	1.10777e-08	1.98631e-06
chr2	21221169	21970959	ENSG00000233005	+	75.5702	4.88143	0.671571	7.26867	3.63033e-13	1.61187e-10
chr8	144409742	144416844	SLC39A4	-	22.6833	4.9262	1.14876	4.28829	1.80057e-05	0.00123445
chr3	12287368	12434356	PPARG	+	124.313	4.93341	0.557356	8.85144	8.63947e-19	9.47699e-16
chr2	21317660	21561313	ENSG00000231204	+	17.1078	5.08378	1.36461	3.72545	0.000194969	0.00765427
chr8	119165034	119245673	MAL2	+	617.615	5.09493	0.361993	14.0747	5.4358e-45	2.02734e-41
chr20	2814968	2818066	ENSG00000241690	+	17.4592	5.13202	1.3499	3.80177	0.000143668	0.00604768
chr5	9035033	9546075	SEMA5A	-	106.249	5.17013	0.608466	8.49699	1.94564e-17	1.72772e-14
chr12	78863993	79452008	SYT1	+	66.0742	5.34936	0.767079	6.97368	3.08747e-12	1.19948e-09
chr8	87540835	87755718	ENSG00000253500	-	1098.87	5.36235	0.350209	15.3118	6.37261e-53	3.96121e-49
chr7	45080437	45088969	NACAD	-	12.7763	5.64557	1.70267	3.31572	0.000914072	0.0237663
chr12	57623409	57633239	B4GALNT1	-	14.8337	5.85745	1.65644	3.53616	0.000405983	0.0133054
chr5	1201595	1225111	SLC6A19	+	36.3479	6.19451	1.22906	5.04004	4.65434e-07	5.64353e-05
chr8	87598462	87601634	IARS2P1	-	21.8073	6.40211	1.57018	4.07731	4.55588e-05	0.00259811
chr8	122781655	122974510	ZHX2	+	589.67	6.5923	0.413441	15.945	3.08783e-57	2.87909e-53
chr14	36070427	36165288	LINC00609	+	25.8518	6.64328	1.54655	4.29555	1.74259e-05	0.00120355
chr8	80967810	81112068	PAG1	-	244.206	6.88265	0.603931	11.3964	4.3568e-30	8.12456e-27
chr8	142212080	142403182	TSNARE1	-	90.2183	6.9012	0.948049	7.27937	3.35381e-13	1.54921e-10
chr8	120535745	120813273	SNTB1	-	837.271	6.93665	0.388677	17.8468	3.05901e-71	5.70444e-67
chr4	100421655	100474461	ENSG00000286150	+	13.1996	7.09909	1.74682	4.064	4.8238e-05	0.00271765
chr8	122807746	122816517	ENSG00000253372	+	38.9213	7.23645	1.49606	4.837	1.31812e-06	0.000134319
chr1	86424171	86456553	CLCA2	+	15.8312	7.3516	1.72623	4.25877	2.05554e-05	0.00134971
chr8	104489231	104589258	LRP12	-	186.206	7.94183	0.914693	8.68251	3.87118e-18	4.01055e-15

## Sheet: EXOK583R_vs_EXOWT_padj005
V1	V2	V3	V4	V6	baseMean	log2FoldChange	lfcSE	stat	pvalue	padj
chrX	13770939	13938638	GPM6B	-	47.9817	-5.02244	0.766682	-6.55088	5.71982e-11	1.79512e-07
chr8	29288506	29320284	ENSG00000288735	-	22.0835	-3.38724	0.834625	-4.0584	4.94103e-05	0.0328938
chr15	80404350	80597933	ARNT2	+	71.4762	-3.06952	0.497023	-6.17581	6.58255e-10	1.6068e-06
chr17	39210541	39225945	STAC2	-	59.6585	-2.73275	0.528582	-5.16997	2.34135e-07	0.000342914
chr9	35673928	35681159	CA9	+	319.572	-2.69607	0.30977	-8.70345	3.2195e-18	1.41458e-14
chr1	184387029	184629019	C1orf21	+	952.004	-2.58511	0.241844	-10.6892	1.14396e-26	1.25658e-22
chr14	95620914	95643285	ENSG00000258927	+	79.2109	-2.29471	0.435512	-5.269	1.3717e-07	0.000215249
chr15	59995648	60004054	ENSG00000289162	-	213.814	-1.95724	0.312606	-6.26105	3.82403e-10	1.05013e-06
chrX	131273506	131578899	IGSF1	-	238.876	-1.57749	0.291611	-5.40957	6.31775e-08	0.000106765
chr1	186671791	186680922	PTGS2	-	158.228	-1.55321	0.379876	-4.08872	4.33756e-05	0.0307393
chrX	87707579	87750883	ENSG00000282914	-	162.598	-1.53811	0.333671	-4.60965	4.03346e-06	0.0051164
chrX	87723928	87728679	ENSG00000289575	-	152.235	-1.52746	0.34376	-4.4434	8.85469e-06	0.00926327
chr13	28820339	29505947	MTUS2	+	175.906	-1.5065	0.332972	-4.52441	6.05636e-06	0.0066526
chr9	114155537	114312511	COL27A1	+	865.383	-1.42323	0.243766	-5.83852	5.26651e-09	9.64167e-06
chr2	21221169	21970959	ENSG00000233005	+	297.765	-1.40742	0.302064	-4.65936	3.17195e-06	0.00435528
chr8	87540835	87755718	ENSG00000253500	-	4390.52	-1.40336	0.232248	-6.04251	1.51733e-09	3.03038e-06
chr5	139846779	140043299	NRG2	-	2109.36	-1.21158	0.263294	-4.60163	4.19206e-06	0.0051164
chr11	72189558	72196323	FOLR1	+	1040.37	-1.20499	0.263404	-4.57469	4.76916e-06	0.0055144
chr17	48997385	49056145	IGF2BP1	+	464.808	-1.09766	0.261753	-4.19349	2.7469e-05	0.0215524
chr1	108560089	108644900	FAM102B	+	5489.4	-0.872098	0.216138	-4.03491	5.46237e-05	0.0352949
chr8	19901717	19967259	LPL	+	12161.7	0.918617	0.223186	4.11592	3.85639e-05	0.0292142
chr12	57028517	57051198	MYO1A	-	2098.71	0.974796	0.224395	4.34411	1.3984e-05	0.0133571
chr7	95035731	95214338	PPP1R9A-AS1	-	468.097	1.13207	0.267894	4.22581	2.3808e-05	0.0193718
chr17	19737984	19748943	ALDH3A1	-	320.404	1.22162	0.284424	4.29505	1.74655e-05	0.0147576
chr1	230314490	230426332	PGBD5	-	74.5507	1.73512	0.425487	4.07797	4.54309e-05	0.0311897
chr22	36253071	36267530	APOL1	+	71.0485	1.91973	0.439434	4.36865	1.25019e-05	0.0124843
chr9	92383268	92404696	OGN	-	74.7695	1.93434	0.449138	4.30678	1.6565e-05	0.0145566
chr13	51222334	51284239	FAM124A	+	104.091	2.37326	0.388714	6.10541	1.02537e-09	2.25263e-06
chr1	159958035	159984750	LINC01133	+	43.0739	2.477	0.572375	4.32758	1.50755e-05	0.0137998
chr12	14942031	14961728	ARHGDIB	-	119.259	2.71958	0.376569	7.22199	5.12328e-13	1.87589e-09
chr3	161600438	161735399	ENSG00000288087	+	3171.42	3.115	0.234072	13.3079	2.08247e-40	4.57498e-36
chrX	18890296	18894974	PHKA2-AS1	+	304.385	3.1625	0.297903	10.6159	2.5137e-26	1.84078e-22
chr12	71125085	71441898	TSPAN8	-	201.394	3.50666	0.35751	9.80856	1.03434e-22	5.68083e-19
chr12	57623409	57633239	B4GALNT1	-	16.9523	5.19293	1.26795	4.09554	4.21181e-05	0.0307393

## Sheet: EXOSC10wt_vs_FLAGwt_padj005
V1	V2	V3	V4	V6	baseMean	log2FoldChange	lfcSE	stat	pvalue	padj
chr9	134880810	134887523	FCN2	+	15.1081	-5.07671	1.35464	-3.74765	0.000178498	0.0072667
chr17	63381231	63414430	ENSG00000226797	-	17.2254	-4.10664	1.13174	-3.62859	0.000284969	0.0103535
chr8	22024125	22036897	NPM2	+	16.091	-3.71407	1.20607	-3.07948	0.00207365	0.043497
chr1	31576485	31587686	TINAGL1	+	39.0797	-3.56876	0.713152	-5.0042	5.6094e-07	6.20773e-05
chr1	159958035	159984750	LINC01133	+	80.4649	-3.56178	0.546091	-6.52232	6.92268e-11	1.77737e-08
chr17	18744026	18779349	FBXW10	+	22.1339	-3.30816	0.954476	-3.46595	0.000528367	0.0165254
chr16	30896614	30903547	CTF1	+	27.8122	-3.30366	0.820735	-4.02524	5.69169e-05	0.00293046
chr5	91642643	91799234	ENSG00000286121	+	61.0194	-3.21243	0.605013	-5.30969	1.09813e-07	1.49969e-05
chr2	218880852	218899581	WNT10A	+	20.6822	-3.12428	0.968085	-3.22728	0.00124974	0.0301566
chr11	126543947	126610948	KIRREL3-AS1	+	20.7125	-3.0645	1.00461	-3.05043	0.00228513	0.0463183
chrX	56618391	56624458	ENSG00000230105	+	16.5442	-2.94891	0.968511	-3.04479	0.00232844	0.0467533
chr15	74152800	74179226	ENSG00000261543	-	28.8619	-2.91133	0.784401	-3.71153	0.000206012	0.0080466
chr12	11212219	11251389	ENSG00000275119	+	30.521	-2.72426	0.756014	-3.60346	0.000314009	0.011115
chr9	92383268	92404696	OGN	-	110.733	-2.69414	0.499652	-5.39202	6.96689e-08	1.03996e-05
chr19	8848844	8981342	MUC16	-	234.76	-2.69193	0.419537	-6.41642	1.3952e-10	3.27634e-08
chr3	7951263	8611924	LMCD1-AS1	-	121.098	-2.59636	0.434536	-5.97502	2.30067e-09	4.2192e-07
chr1	11637018	11655785	FBXO2	-	53.6486	-2.51247	0.600913	-4.18109	2.90117e-05	0.00171748
chrX	18890296	18894974	PHKA2-AS1	+	190.318	-2.46756	0.354913	-6.95258	3.58663e-12	1.1322e-09
chr16	28284885	28292064	ENSG00000246465	-	30.6444	-2.31089	0.708816	-3.26021	0.00111329	0.0279498
chr6	63275951	63319983	LGSN	-	380.9	-2.30415	0.318186	-7.24153	4.43649e-13	1.70858e-10
chr20	31819308	31834689	MYLK2	+	40.4939	-2.24405	0.656757	-3.41687	0.000633451	0.0189605
chr1	159927039	159945613	IGSF9	-	45.277	-2.20381	0.632645	-3.48348	0.000494932	0.015675
chr18	50795120	50825402	MRO	-	107.685	-2.19391	0.437673	-5.01267	5.36797e-07	5.97489e-05
chr15	41848146	41894053	SPTBN5	-	88.4649	-2.13715	0.515443	-4.14623	3.37994e-05	0.00191989
chr1	17755333	17827063	ACTL8	+	570.125	-2.10828	0.29078	-7.25042	4.1548e-13	1.63275e-10
chr1	156699606	156705816	CRABP2	-	722.926	-2.09211	0.275358	-7.59779	3.01231e-14	1.56771e-11
chr17	15565483	15619704	FBXW10B	-	88.2592	-2.07166	0.465313	-4.45218	8.50038e-06	0.00062237
chr21	41304212	41357727	FAM3B	+	73.8264	-1.99553	0.478178	-4.17321	3.00343e-05	0.00173812
chr22	36253071	36267530	APOL1	+	70.1571	-1.99526	0.495222	-4.02902	5.60094e-05	0.00289924
chr8	122485194	122733804	LINC01151	-	109.26	-1.95573	0.414014	-4.72381	2.31464e-06	0.000208351
chr10	84139482	84154841	GHITM	+	7797.01	-1.9529	0.267059	-7.31261	2.61995e-13	1.09673e-10
chr2	105744912	105894274	NCK2	+	81.6392	-1.94493	0.466147	-4.17234	3.01481e-05	0.00173812
chr19	39306566	39320863	LRFN1	-	70.9567	-1.93916	0.515974	-3.75825	0.000171107	0.00707047
chr15	74179466	74212267	STRA6	-	656.807	-1.93323	0.300191	-6.44002	1.19457e-10	2.87534e-08
chr12	110501655	110533556	RAD9B	+	90.4541	-1.92416	0.489356	-3.93203	8.4232e-05	0.00405493
chr17	63391191	63431089	ENSG00000263644	-	45.4654	-1.90253	0.582558	-3.26583	0.00109146	0.0276497
chr11	119364359	119526664	USP2-AS1	+	272.305	-1.87048	0.378745	-4.93862	7.86756e-07	8.18907e-05
chr20	1186092	1207036	ENSG00000274269	+	44.4636	-1.86903	0.604746	-3.09061	0.00199747	0.0425527
chr5	95652181	95698711	SPATA9	-	62.5526	-1.83867	0.55488	-3.31364	0.000920902	0.0242491
chr17	82359247	82363775	TEX19	+	44.7077	-1.83261	0.593522	-3.08769	0.00201719	0.0427888
chr15	40278176	40307935	PLCB2	-	72.158	-1.83043	0.552149	-3.3151	0.000916099	0.0241649
chr17	19737984	19748943	ALDH3A1	-	407.837	-1.78598	0.339254	-5.26445	1.4061e-07	1.8673e-05
chr15	74202705	74336472	CCDC33	+	70.8579	-1.78565	0.539673	-3.30876	0.000937091	0.0244176
chr19	38935297	38938632	ERVK9-11	-	49.4902	-1.78152	0.581348	-3.06447	0.00218057	0.0448284
chr14	105140982	105168824	JAG2	-	617.819	-1.76127	0.372245	-4.73147	2.229e-06	0.00020342
chr3	50674927	51384198	DOCK3	+	197.112	-1.73471	0.40229	-4.31209	1.6172e-05	0.00104499
chr12	109277978	109309284	FOXN4	-	183.717	-1.72228	0.362393	-4.75251	2.00902e-06	0.000187795
chr20	35172072	35216240	PROCR	+	352.875	-1.71373	0.308529	-5.55451	2.78387e-08	4.43026e-06
chr12	6439001	6451607	CD27-AS1	-	86.5569	-1.68234	0.450509	-3.73431	0.000188227	0.00753534
chr5	173314723	173328447	STC2	-	167.117	-1.66612	0.359033	-4.64059	3.47424e-06	0.000296017
chr11	68683779	68691175	GAL	+	143.331	-1.62988	0.413508	-3.94158	8.09455e-05	0.00393608
chr22	29480218	29491390	NEFH	+	429.992	-1.6032	0.289056	-5.54631	2.91754e-08	4.60493e-06
chr18	26655737	27190698	AQP4-AS1	+	99.4387	-1.59354	0.442558	-3.60076	0.000317292	0.0111567
chr7	90245174	90311063	CFAP69	+	91.6857	-1.59349	0.504449	-3.15887	0.00158383	0.0361574
chr6	100962701	102081622	GRIK2	+	76.3714	-1.59163	0.505984	-3.14562	0.00165735	0.0373261
chr5	172641263	172691540	NEURL1B	+	299.098	-1.57678	0.316521	-4.98159	6.30644e-07	6.87174e-05
chr11	120236640	120319945	POU2F3	+	117.565	-1.57234	0.401137	-3.91972	8.86534e-05	0.00422552
chr3	52451100	52454041	TNNC1	-	65.2206	-1.56188	0.508057	-3.07422	0.00211056	0.0437907
chr8	143758153	143771870	ENSG00000254973	-	78.1669	-1.559	0.463006	-3.36714	0.000759529	0.0209798
chr17	75827225	75844785	UNC13D	-	636.924	-1.54948	0.303718	-5.10172	3.36586e-07	4.05081e-05
chr1	116423724	116478842	LINC01762	-	68.506	-1.54774	0.502652	-3.07914	0.00207597	0.0434981
chr16	56608584	56609497	MT2A	+	545.434	-1.51184	0.305893	-4.9424	7.71674e-07	8.07573e-05
chr6	31197760	31203968	HCG27	+	129.643	-1.5066	0.407754	-3.69486	0.000220006	0.00848986
chr8	25508779	25509735	ENSG00000289357	+	74.7479	-1.47566	0.483164	-3.05415	0.00225698	0.0459898
chr3	32105689	32168709	GPD1L	+	2174.73	-1.46973	0.245099	-5.99649	2.0163e-09	3.73326e-07
chr17	1742836	1755265	SERPINF2	+	83.3542	-1.46617	0.452923	-3.23713	0.00120737	0.0295191
chr13	50104833	50105174	ENSG00000273541	+	150.229	-1.46227	0.434082	-3.36864	0.000755398	0.0209489
chr6	109390215	109441171	PPIL6	-	130.683	-1.46168	0.396716	-3.68446	0.000229192	0.00872325
chr2	189674290	189761193	ANKAR	+	80.1897	-1.46041	0.476579	-3.06436	0.00218136	0.0448284
chr10	1022618	1045425	IDI2-AS1	+	120.272	-1.44822	0.420002	-3.44814	0.000564471	0.0173356
chr20	35278907	35284985	EIF6	-	2516.87	-1.43639	0.288869	-4.97248	6.61033e-07	7.11109e-05
chr1	31727117	31764893	ADGRB2	-	271.221	-1.43436	0.339709	-4.22231	2.41808e-05	0.00146423
chr9	137062127	137070557	SAPCD2	-	1361.27	-1.43137	0.313412	-4.56704	4.94655e-06	0.000391978
chr11	65499312	65507432	TALAM1	-	479.97	-1.40806	0.370054	-3.80501	0.000141798	0.0060798
chr8	49054311	49076093	PPDPFL	+	1691.26	-1.40188	0.286235	-4.89764	9.69952e-07	9.8302e-05
chr17	29929200	30108452	EFCAB5	+	277.868	-1.39613	0.329131	-4.24186	2.21677e-05	0.00136814
chr2	151788984	151828492	ARL5A	-	2083.07	-1.38443	0.296666	-4.66662	3.06199e-06	0.000264275
chr12	102304355	102463491	LINC02456	+	144.209	-1.36443	0.406589	-3.3558	0.000791345	0.0215705
chr14	20461992	20477094	PNP	+	2121.91	-1.36193	0.265934	-5.1213	3.03435e-07	3.72162e-05
chr17	50164214	50175928	SGCA	+	208.475	-1.35854	0.351426	-3.86578	0.000110734	0.0050054
chr4	121816444	121823883	CCNA2	-	2991.04	-1.35289	0.268769	-5.03364	4.81257e-07	5.38784e-05
chr8	127735434	127742951	MYC	+	5125.5	-1.34911	0.259564	-5.19761	2.01865e-07	2.52904e-05
chrX	48458537	48470260	SLC38A5	-	131.234	-1.34757	0.424077	-3.17765	0.00148475	0.0344049
chr6	26270918	26271413	H3C8	-	3433.09	-1.33611	0.295243	-4.52546	6.02641e-06	0.000460494
chr6	39188971	39229475	KCNK5	-	246.574	-1.336	0.329801	-4.05092	5.10171e-05	0.00269146
chr2	151802651	151973949	ENSG00000283228	-	996.058	-1.33304	0.297485	-4.48103	7.42853e-06	0.0005514
chr12	109111218	109125594	ENSG00000256139	+	106.721	-1.32909	0.424582	-3.13036	0.00174594	0.038433
chr1	149813225	149813693	H3C13	-	269.407	-1.32819	0.423265	-3.13797	0.00170124	0.037828
chr13	50015254	50020922	KCNRG	+	159.725	-1.32756	0.39174	-3.38888	0.000701797	0.0201098
chr20	46557823	46684467	SLC13A3	-	132.067	-1.3275	0.38302	-3.46587	0.00052852	0.0165254
chr12	47753916	47782751	SLC48A1	+	214.121	-1.30449	0.348973	-3.73809	0.000185426	0.00744388
chr6	27831174	27831560	H4C12	-	153.17	-1.28944	0.382296	-3.37289	0.000743849	0.0208328
chr3	112561709	112585579	SLC35A5	+	1932.21	-1.28917	0.274232	-4.70101	2.5888e-06	0.000229723
chr1	228458103	228463104	H2BU1	+	315.579	-1.28333	0.361378	-3.55123	0.000383441	0.0129083
chr22	21628089	21630064	YDJC	-	773.983	-1.28078	0.364666	-3.51221	0.0004444	0.0144306
chr20	38404893	38416797	ENSG00000224635	-	248.878	-1.27978	0.321414	-3.98173	6.84164e-05	0.0033867
chr19	41386371	41397362	EXOSC5	-	548.639	-1.27462	0.326855	-3.89965	9.63307e-05	0.00448054
chr1	111431046	111433068	ENSG00000260948	-	131.997	-1.24973	0.406297	-3.0759	0.0020987	0.0436893
chr16	30757423	30762221	CFAP119	-	152.812	-1.23765	0.384821	-3.21619	0.00129907	0.0310359
chr7	100620416	100642779	TFR2	-	158.948	-1.22893	0.390503	-3.14704	0.00164932	0.0373199
chr12	110468415	110490385	FAM216A	+	1072.25	-1.22693	0.266629	-4.60162	4.1921e-06	0.00034497
chrX	37836757	37847571	DYNLT3	-	943.227	-1.22647	0.349989	-3.50432	0.000457781	0.0147656
chr13	27424619	27435823	GTF3A	+	2442.54	-1.22434	0.268148	-4.56591	4.97324e-06	0.000392479
chr5	146084313	146105577	PLAC8L1	-	177.984	-1.22077	0.386594	-3.15776	0.00158985	0.0362298
chr19	55399745	55407788	UBE2S	-	1061.53	-1.21944	0.354955	-3.43549	0.000591484	0.0180501
chr6	26103933	26104337	H4C3	+	3202.08	-1.20787	0.313171	-3.85691	0.000114831	0.00509491
chr5	13690328	14011818	DNAH5	-	292.977	-1.20257	0.341106	-3.52552	0.000422653	0.0138884
chr17	78214186	78225636	BIRC5	+	4533.27	-1.19536	0.251833	-4.74663	2.06839e-06	0.000191485
chr6	2663629	2770330	MYLK4	-	738.035	-1.19446	0.277434	-4.30539	1.66694e-05	0.0010664
chr4	173331376	173334432	HMGB2	-	2717.93	-1.19205	0.264932	-4.49945	6.81302e-06	0.000514476
chr17	74987632	75005800	CDR2L	+	818.418	-1.19076	0.315727	-3.7715	0.000162268	0.00676328
chr19	1397026	1401570	GAMT	-	970.903	-1.19045	0.294703	-4.0395	5.35654e-05	0.00280227
chr5	133971871	134004975	VDAC1	-	7253.04	-1.18959	0.240613	-4.94399	7.65401e-07	8.05386e-05
chr4	120055623	120066858	MAD2L1	-	1523.17	-1.18763	0.288493	-4.11666	3.84405e-05	0.00214554
chr20	3208868	3223870	ITPA	+	1087.15	-1.18577	0.27006	-4.39077	1.12948e-05	0.000782345
chr5	179678628	179731641	CANX	+	46712.7	-1.18084	0.256712	-4.59984	4.22806e-06	0.000346449
chr3	129893811	129918578	TMCC1-DT	+	576.224	-1.17882	0.277139	-4.25355	2.10411e-05	0.00131548
chr5	91380349	91616105	ARRDC3-AS1	+	909.778	-1.17763	0.304857	-3.86288	0.00011206	0.00505346
chr11	70372246	70398488	CTTN-DT	-	253.763	-1.17592	0.348423	-3.37497	0.000738243	0.020783
chr6	27133043	27133535	H2AC11	+	3998.54	-1.17376	0.289167	-4.0591	4.92618e-05	0.00263496
chr6	27893425	27893891	H2BC17	+	1770.48	-1.16792	0.294009	-3.97239	7.11537e-05	0.00350418
chr6	26031589	26032099	H3C2	-	4960.87	-1.16573	0.320436	-3.63794	0.000274828	0.0100769
chr6	27807479	27807929	H2BC13	-	1285.08	-1.16111	0.31811	-3.65004	0.000262202	0.0096909
chr2	112736349	112764664	CKAP2L	-	1594.18	-1.15728	0.265446	-4.35976	1.30208e-05	0.000870057
chr6	27865317	27865798	H2AC16	+	801.192	-1.15614	0.340508	-3.39534	0.000685442	0.0199573
chr20	45812576	45816957	UBE2C	+	1874.21	-1.15352	0.282673	-4.08077	4.48868e-05	0.00245551
chr6	27810051	27811300	H3C10	+	2899.98	-1.15349	0.328049	-3.51621	0.000437756	0.0143302
chr6	26114873	26123926	H2BC4	-	3908.11	-1.14686	0.284153	-4.03606	5.43552e-05	0.00282882
chr11	27330827	27363234	CCDC34	-	1727.04	-1.14633	0.261407	-4.38522	1.1587e-05	0.000791205
chr21	36135079	36146562	CBR3	+	271.254	-1.13858	0.330125	-3.44893	0.000562816	0.0173124
chr9	131096476	131123152	AIF1L	+	790.356	-1.13842	0.265685	-4.28485	1.82862e-05	0.00115449
chr2	84516455	84819589	DNAH6	+	277.084	-1.13809	0.344399	-3.30455	0.000951278	0.0247424
chr16	68225969	68229145	ENSG00000262160	-	299.407	-1.13596	0.325919	-3.4854	0.0004914	0.0155888
chr9	136658856	136672678	EGFL7	+	470.7	-1.13464	0.351109	-3.2316	0.00123098	0.0300047
chr10	93496612	93529092	CEP55	+	3445.92	-1.13457	0.270973	-4.18704	2.82618e-05	0.00168486
chr20	35267885	35280043	ENSG00000261582	-	1726.88	-1.12934	0.292571	-3.86006	0.00011336	0.00508638
chr7	101308270	101314800	EMSLR	+	185.407	-1.1284	0.360479	-3.13028	0.00174641	0.038433
chr6	26026896	26027283	H4C2	-	2347.59	-1.12739	0.308578	-3.6535	0.000258686	0.0095978
chr3	8619386	8745040	SSUH2	-	459.699	-1.12647	0.30073	-3.7458	0.000179817	0.00728961
chr6	26277609	26285638	H4C8	-	2289.85	-1.12452	0.311276	-3.61261	0.000303133	0.0108497
chr20	10420546	10420737	MKKS	-	219.755	-1.12295	0.353744	-3.17447	0.00150111	0.0346586
chr3	71581721	71628558	ENSG00000277855	+	208.725	-1.12091	0.338503	-3.31137	0.00092842	0.0242903
chr6	27146361	27146855	H2BC12	-	1846.04	-1.11962	0.305009	-3.67078	0.00024181	0.00907658
chr2	24067586	24076373	SF3B6	-	2343.87	-1.11897	0.288389	-3.88007	0.000104424	0.00475366
chr13	50082169	50906856	DLEU1	+	1219.95	-1.1145	0.286936	-3.88415	0.000102687	0.00468564
chr5	176383946	176388927	NOP16	-	1594.41	-1.11353	0.253321	-4.39573	1.10399e-05	0.000770234
chr6	26198784	26199293	H2AC7	-	2432.26	-1.11057	0.297111	-3.73791	0.000185556	0.00744388
chr13	91347820	91354579	MIR17HG	+	852.739	-1.10801	0.28515	-3.88571	0.000102032	0.00467792
chr8	127072694	127227541	CASC19	-	50902.2	-1.10528	0.261105	-4.23308	2.30514e-05	0.00140914
chr19	2867335	2883445	ZNF556	+	263.88	-1.10426	0.325281	-3.39477	0.000686858	0.0199573
chr6	26272931	26273412	H2BC10	+	1491.86	-1.1013	0.293149	-3.75678	0.000172114	0.00709686
chr6	26251614	26252075	H2BC9	+	2958.44	-1.09977	0.274822	-4.00178	6.28688e-05	0.0031915
chr9	136940435	136944738	FBXW5	-	2762.47	-1.09969	0.329554	-3.3369	0.000847172	0.0226571
chr1	211658657	211675630	NEK2	-	2684.94	-1.09507	0.285169	-3.84009	0.000122992	0.00537036
chr6	27892699	27893185	H2AC17	-	2247.15	-1.09416	0.290423	-3.76748	0.000164906	0.00684359
chr11	62337448	62393412	ASRGL1	+	268.125	-1.08672	0.320118	-3.39475	0.000686906	0.0199573
chr12	6844793	6851292	CDCA3	-	773.492	-1.08122	0.271159	-3.98739	6.68035e-05	0.00332395
chr14	67360328	67386516	EIF2S1	+	3975.27	-1.07585	0.259863	-4.14006	3.47221e-05	0.001955
chr12	56101331	56109289	ENSG00000257411	+	2460.29	-1.07217	0.245177	-4.37304	1.22528e-05	0.000830773
chr14	34709113	34714823	CFL2	-	1341.14	-1.07154	0.317709	-3.3727	0.000744338	0.0208328
chr6	41934934	42050357	CCND3	-	1146.13	-1.07152	0.289565	-3.70045	0.000215216	0.00832389
chr6	26156329	26157115	H1-4	+	7062.19	-1.07102	0.289067	-3.7051	0.000211304	0.00820336
chr9	110190048	110208159	C9orf152	-	338.544	-1.06946	0.315678	-3.38781	0.000704527	0.0201581
chr11	66856647	66860475	LRFN4	+	1357.48	-1.06902	0.341842	-3.12724	0.00176458	0.0387002
chr6	26033092	26033618	H2AC4	-	1299	-1.06861	0.316155	-3.38002	0.000724815	0.0205251
chr6	27890315	27893106	H3C12	-	2374.85	-1.06522	0.288748	-3.6891	0.000225049	0.00864979
chr1	43358981	43363203	CDC20	+	3017.48	-1.06095	0.268919	-3.94525	7.97171e-05	0.00390593
chr21	36069941	36073166	CBR1	+	1639.11	-1.05913	0.277915	-3.811	0.000138407	0.00596233
chr2	74549026	74557551	DOK1	+	376.2	-1.05665	0.302633	-3.49151	0.0004803	0.0153123
chr5	163460203	163491941	HMMR	+	3052.68	-1.05562	0.290678	-3.63158	0.000281695	0.0102869
chr17	3723903	3726699	HASPIN	+	601.644	-1.05479	0.278648	-3.7854	0.000153461	0.00643802
chr6	26250142	26250635	H3C7	-	3066.73	-1.05358	0.325293	-3.23887	0.00120005	0.0293997
chr12	56104537	56113910	PA2G4	+	6208.99	-1.05314	0.237706	-4.43045	9.40365e-06	0.000675659
chr13	21153595	21176552	SKA3	-	858.988	-1.04808	0.271593	-3.85901	0.000113846	0.00508638
chr17	6444441	6451469	PIMREG	+	512.874	-1.04621	0.308499	-3.39128	0.000695679	0.0200414
chr22	24594811	24629005	GGT1	+	336.733	-1.04337	0.309753	-3.36838	0.000756102	0.0209489
chr6	27808173	27808667	H2AC13	+	2217.88	-1.04228	0.298149	-3.49584	0.000472574	0.0151161
chr6	27125897	27132795	H2BC11	-	2607.14	-1.04227	0.306409	-3.40157	0.000669993	0.019743
chr1	3625015	3630127	TPRG1L	+	328.27	-1.0419	0.323175	-3.22397	0.00126428	0.0303553
chr11	369499	382117	B4GALNT4	+	724.733	-1.03563	0.335665	-3.08531	0.00203341	0.0429335
chr22	21102984	21122286	BCRP2	+	265.661	-1.03098	0.337905	-3.0511	0.00228002	0.0463123
chr3	170864875	170870208	RPL22L1	-	1981.73	-1.02937	0.279283	-3.68576	0.000228021	0.00872325
chr15	41309273	41332591	OIP5	-	1068.27	-1.02392	0.25612	-3.99782	6.39281e-05	0.00322251
chr8	27809624	27838082	PBK	-	3443.96	-1.02323	0.28741	-3.56018	0.000370608	0.012542
chr10	102152176	102163871	NOLC1	+	8241.34	-1.02278	0.238325	-4.29154	1.77437e-05	0.00112763
chr21	45493572	45573365	SLC19A1	-	1036.76	-1.02166	0.311306	-3.28186	0.00103124	0.0264415
chr3	121394772	121431198	ENSG00000287022	-	497.01	-1.01947	0.321895	-3.16708	0.00153979	0.0353398
chr14	54396849	54420218	CDKN3	+	960.367	-1.01515	0.283841	-3.57648	0.000348256	0.0119324
chr11	60914158	60923443	TMEM109	+	1345.51	-1.01485	0.27674	-3.66716	0.000245261	0.00918822
chr6	27866792	27867588	H1-5	-	4019.83	-1.01207	0.277775	-3.64348	0.000268972	0.00992209
chr22	41367333	41399326	TEF	+	251.872	-1.01015	0.325023	-3.10793	0.001884	0.0405797
chr19	45406644	45410737	POLR1G	+	745.181	-1.00523	0.292043	-3.44207	0.000577291	0.017645
chr6	26195595	26199293	ENSG00000282988	-	4610	-1.00209	0.297354	-3.37002	0.000751626	0.0209234
chr2	189661452	189666437	ASDURF	+	479.296	-1.00055	0.301301	-3.32076	0.00089774	0.0237457
chr15	32641676	32697098	SCG5	+	529.774	-0.999333	0.313213	-3.19059	0.00141983	0.0333013
chr1	149782689	149812373	H2BC18	-	810.565	-0.997596	0.274239	-3.63769	0.000275097	0.0100769
chrX	107628428	107651993	PRPS1	+	3030.81	-0.994873	0.254945	-3.90231	9.52801e-05	0.00444538
chr16	2429394	2458854	CCNF	+	1868.05	-0.99459	0.276243	-3.60042	0.000317704	0.0111567
chr11	10858179	10908972	ZBED5-AS1	+	340.167	-0.99308	0.308162	-3.22259	0.00127037	0.0304635
chr1	150218417	150236156	ANP32E	-	4080.19	-0.990843	0.264372	-3.74791	0.000178312	0.0072667
chr6	27147106	27147562	H2AC12	+	2298.64	-0.989858	0.316441	-3.1281	0.00175942	0.0386752
chr9	136673143	136687457	AGPAT2	-	1030.15	-0.987256	0.32277	-3.0587	0.00222302	0.0454427
chr1	37692481	37709719	CDCA8	+	1724.92	-0.983728	0.245041	-4.01455	5.95603e-05	0.00305025
chr6	26216200	26216688	H2BC8	-	2816.24	-0.982642	0.305826	-3.21307	0.00131323	0.0313352
chr3	48157146	48188417	CDC25A	-	2931.52	-0.980041	0.241122	-4.06451	4.81336e-05	0.002589
chr8	145052465	145066685	C8orf33	+	3159.81	-0.979104	0.253083	-3.86871	0.000109414	0.00495735
chr10	100980507	100985614	ENSG00000236662	-	331.308	-0.975294	0.306618	-3.18081	0.00146864	0.0341547
chr17	8204733	8210600	AURKB	-	1139.31	-0.973343	0.283883	-3.42868	0.000606519	0.0184394
chr17	15571491	15651653	ENSG00000251537	-	1125.55	-0.969879	0.268589	-3.61102	0.000304999	0.010876
chr6	44219553	44234142	SLC29A1	+	899.119	-0.967982	0.285786	-3.38708	0.000706398	0.0201816
chr2	189661519	189667881	ENSG00000286165	+	1103.83	-0.967631	0.287781	-3.36239	0.000772709	0.0212561
chr15	67254786	67502260	IQCH	+	957.82	-0.966023	0.287999	-3.35426	0.000795772	0.0216432
chr1	211743457	211830763	LPGAT1	-	8102.03	-0.965597	0.257492	-3.75	0.000176833	0.00724548
chr2	189661385	189670831	ASNSD1	+	1313.37	-0.965407	0.283291	-3.40782	0.000654831	0.019429
chrX	72204657	72239027	ERCC6L	-	547.346	-0.962599	0.281328	-3.42162	0.000622491	0.0187292
chr2	10439968	10448327	ODC1	-	2622.07	-0.962139	0.279483	-3.44257	0.00057621	0.0176399
chr17	47649476	47685505	KPNB1	+	16471	-0.958177	0.236227	-4.05617	4.98834e-05	0.00265347
chr19	10111693	10115372	P2RY11	+	626.749	-0.956431	0.300253	-3.18541	0.00144548	0.0338203
chr1	156594301	156601496	GPATCH4	-	2853.89	-0.952209	0.244626	-3.89251	9.92117e-05	0.00458134
chr2	86720291	86778041	RMND5A	+	4601.57	-0.951909	0.255733	-3.72227	0.00019744	0.00779077
chr2	74135400	74147912	BOLA3	-	794.101	-0.946925	0.283399	-3.34131	0.000833828	0.0223624
chr17	4997950	5028401	KIF1C	+	6468.62	-0.945318	0.258281	-3.66004	0.000252179	0.00939259
chrX	154348524	154374634	FLNA	-	49851.8	-0.945266	0.286525	-3.29907	0.000970062	0.0250732
chr7	44983019	44986961	SNHG15	-	1353.75	-0.942866	0.275453	-3.42296	0.000619435	0.0186664
chr5	69167135	69178245	CCNB1	+	6595.21	-0.941854	0.256116	-3.67745	0.000235573	0.00891197
chr18	80046900	80095482	RBFADN	+	489.097	-0.940403	0.286128	-3.28665	0.00101386	0.0260306
chr2	219209772	219218994	ABCB6	-	2126.12	-0.937198	0.287917	-3.2551	0.00113351	0.0282366
chr1	1401909	1407293	MRPL20	-	1137.54	-0.936554	0.265712	-3.52469	0.000423972	0.013908
chr19	44664131	44666158	ENSG00000279095	+	348.14	-0.935624	0.301432	-3.10393	0.00190966	0.0410219
chr6	26158122	26171349	H2BC5	+	3681.75	-0.93484	0.299363	-3.12277	0.00179161	0.0390262
chr6	26199516	26199988	H2BC7	+	1891.03	-0.934378	0.282312	-3.30974	0.000933832	0.0243657
chr18	46917492	47103478	KATNAL2	+	527.454	-0.934008	0.292472	-3.1935	0.00140561	0.0330885
chr17	18697998	18736118	TRIM16L	+	746.172	-0.928441	0.284619	-3.26205	0.0011061	0.0278418
chr8	27771949	27812640	ESCO2	+	1632.75	-0.927153	0.287489	-3.225	0.00125972	0.0302835
chr12	54230942	54280133	CBX5	-	6916.08	-0.927023	0.247138	-3.75103	0.00017611	0.00724548
chr1	10456522	10472529	DFFA	-	3059.17	-0.926925	0.249579	-3.71396	0.000204045	0.00798596
chr6	27838545	27855709	H2BC15	+	1373.38	-0.925781	0.284798	-3.25066	0.00115137	0.0284606
chr20	38926312	38953106	FAM83D	+	2287.42	-0.925714	0.267133	-3.46537	0.000529505	0.0165254
chr8	66429014	66430733	RRS1	+	753.752	-0.924681	0.294243	-3.14258	0.00167466	0.0376721
chr17	3860315	3894891	CAMKK1	-	1344.66	-0.922958	0.263765	-3.49918	0.0004667	0.014978
chr6	96889315	96897891	NDUFAF4	-	431.815	-0.921806	0.298349	-3.08969	0.00200364	0.0425851
chr1	53242364	53328469	LRP8	-	4585.18	-0.92179	0.24633	-3.7421	0.000182491	0.00738244
chr8	91070196	91087095	OTUD6B	+	1412.24	-0.921762	0.295049	-3.1241	0.00178353	0.0389825
chr19	18306236	18323112	LSM4	-	4162.45	-0.921197	0.270521	-3.40527	0.000660977	0.0195812
chr15	68190705	68206079	CALML4	-	956.046	-0.916956	0.257469	-3.56143	0.000368839	0.0125042
chr19	19033575	19060311	ARMC6	+	1487.87	-0.916056	0.294498	-3.11057	0.00186726	0.0403094
chr5	160421855	160428739	PTTG1	+	2941.41	-0.915523	0.273179	-3.35137	0.000804124	0.0218395
chr12	64404392	64451125	XPOT	+	8596.88	-0.913993	0.26103	-3.50149	0.00046267	0.0148983
chr4	107989714	108035241	HADH	+	1859.68	-0.911881	0.244368	-3.7316	0.00019027	0.00756993
chr7	36389821	36453791	ANLN	+	10256.8	-0.907617	0.245867	-3.6915	0.000222937	0.00858574
chr8	100133351	100145817	FBXO43	-	925.28	-0.9061	0.268647	-3.37283	0.000744002	0.0208328
chr6	33391823	33409896	KIFC1	+	2384.47	-0.905887	0.259802	-3.48683	0.000488779	0.0155312
chr1	211571568	211579161	SLC30A1	-	5623.19	-0.905184	0.277202	-3.26543	0.00109298	0.0276497
chr1	19251805	19260128	MRTO4	+	1472.36	-0.904957	0.262144	-3.45213	0.000556178	0.01714
chr17	58083419	58095542	DYNLL2	+	1982.95	-0.902996	0.248922	-3.62763	0.000286037	0.0103727
chr9	37485948	37503697	POLR1E	+	1991.68	-0.902275	0.24687	-3.65486	0.000257318	0.00956546
chr9	33441156	33447596	AQP3	-	5794.83	-0.901404	0.259263	-3.47679	0.00050746	0.0160454
chr4	4267701	4290154	LYAR	-	1100.15	-0.89867	0.262254	-3.42671	0.000610936	0.0184681
chr17	44924709	44947773	KIF18B	-	2045.63	-0.898332	0.255508	-3.51586	0.000438331	0.0143302
chr9	137241287	137243707	TUBB4B	+	6387.15	-0.894692	0.267425	-3.34558	0.000821104	0.022199
chr1	156668763	156677407	NES	-	485.214	-0.893873	0.281383	-3.17671	0.00148957	0.034475
chr15	40161023	40221123	BUB1B	+	5505.14	-0.893871	0.243136	-3.67642	0.000236528	0.00893055
chr12	98515579	98550351	TMPO	+	13716.8	-0.892059	0.276109	-3.23082	0.00123437	0.0300475
chr2	241675747	241686944	DTYMK	-	1261.22	-0.889579	0.275704	-3.22657	0.00125282	0.0301932
chr2	121726945	121736911	NIFK	-	1999.97	-0.885433	0.270269	-3.27612	0.00105245	0.0268781
chr1	149884459	149886682	H2BC21	-	2342.23	-0.883417	0.275823	-3.20284	0.00136082	0.0321915
chr2	61868085	61888671	CCT4	-	12750.1	-0.882442	0.261385	-3.37602	0.000735423	0.0207644
chr2	110637528	110678063	BUB1	-	4978.52	-0.879336	0.246235	-3.57113	0.000355442	0.012157
chr15	41320794	41381050	NUSAP1	+	7505.65	-0.878256	0.246599	-3.56147	0.000368778	0.0125042
chr17	40388525	40417896	TOP2A	-	20410.7	-0.877352	0.261424	-3.35605	0.000790656	0.0215705
chr1	202331544	202341984	UBE2T	-	3185.8	-0.877038	0.260155	-3.37121	0.000748387	0.0208962
chr9	113407235	113410675	POLE3	-	2662.04	-0.875101	0.27883	-3.13847	0.00169832	0.037828
chr1	53765478	53838463	NDC1	-	6745.61	-0.874868	0.25755	-3.39689	0.000681573	0.0199505
chr1	25884181	25906991	STMN1	-	5671.42	-0.874821	0.267348	-3.27222	0.00106708	0.0271079
chr6	38675925	38703145	GLO1	-	7588.65	-0.871187	0.285715	-3.04914	0.00229494	0.0464195
chr16	58295080	58406147	GINS3	+	678.631	-0.865386	0.27012	-3.20371	0.00135671	0.0321338
chr4	177309874	177362936	NEIL3	+	1490.26	-0.865142	0.284075	-3.04548	0.00232312	0.0467441
chr2	174559572	174682916	WIPF1	-	1918.85	-0.861952	0.26433	-3.2609	0.00111061	0.0279189
chr6	26055740	26056470	H1-2	-	10331.2	-0.859213	0.266414	-3.2251	0.00125928	0.0302835
chr9	113275642	113294009	PRPF4	+	2588.26	-0.859008	0.251423	-3.41659	0.000634118	0.0189605
chr20	56369389	56392337	AURKA	-	4766.91	-0.85886	0.245387	-3.50001	0.000465232	0.0149558
chr9	136401922	136410614	ENTR1	-	1983.78	-0.857444	0.281335	-3.04777	0.00230543	0.0465339
chr21	43789513	43805293	RRP1	+	1946.46	-0.856499	0.278334	-3.07723	0.00208933	0.0436358
chr16	4257186	4273075	TFAP4	-	997.677	-0.854661	0.282057	-3.03011	0.00244468	0.0483314
chr14	104937244	104978374	AHNAK2	-	4574.5	-0.854543	0.262524	-3.2551	0.00113351	0.0282366
chr2	33532744	33599347	FAM98A	-	2223.29	-0.85428	0.261687	-3.26451	0.00109655	0.0276738
chr17	2322396	2336657	TSR1	-	6800.25	-0.853547	0.252124	-3.38543	0.000710678	0.0202438
chr1	52684449	52698347	COA7	-	2416.43	-0.853373	0.257602	-3.31276	0.000923818	0.0242491
chrX	48476021	48486364	FTSJ1	+	1850.25	-0.852502	0.269146	-3.16743	0.0015379	0.0353387
chr3	142815922	142889206	PCOLCE2	-	1492	-0.851164	0.246359	-3.45497	0.000550356	0.017038
chr22	39519695	39522683	ATF4	+	4516.26	-0.851087	0.263487	-3.23009	0.00123751	0.0300475
chr6	36854827	36874803	PPIL1	-	1064.98	-0.851013	0.262012	-3.24799	0.00116222	0.028692
chr8	25459199	25507911	CDCA2	+	2183.05	-0.850907	0.249466	-3.41092	0.000647445	0.019329
chr19	10553085	10566031	KRI1	-	2174.63	-0.850467	0.273376	-3.11098	0.00186466	0.0402985
chr12	57747727	57756013	CDK4	-	3322.02	-0.843824	0.265066	-3.18345	0.0014553	0.0339264
chr1	38862493	38873368	MYCBP	-	1170.27	-0.843545	0.274748	-3.07025	0.0021388	0.044212
chr14	105009573	105021083	CDCA4	-	923.71	-0.842515	0.275354	-3.05975	0.00221518	0.0453783
chr15	59121034	59133250	ENSG00000259732	+	656.982	-0.841962	0.273694	-3.07629	0.00209596	0.0436795
chr7	151211484	151227205	ABCF2	-	3211.47	-0.841731	0.250674	-3.35787	0.000785454	0.021484
chr11	236966	252984	PSMD13	+	2701.43	-0.839991	0.242352	-3.466	0.000528261	0.0165254
chr14	102080742	102139699	HSP90AA1	-	16810.9	-0.839032	0.238798	-3.51356	0.000442149	0.0144086
chr1	35599541	35641526	PSMB2	-	4838.41	-0.838419	0.247276	-3.39063	0.000697329	0.0200414
chr3	121431431	121545988	POLQ	-	4945.68	-0.838179	0.260205	-3.22123	0.00127643	0.0305708
chr7	151207837	151227166	ABCF2-H2BK1	-	3263.94	-0.83775	0.250383	-3.34587	0.000820247	0.022199
chr10	86958599	86963258	SNCG	+	4011.15	-0.835683	0.271344	-3.07979	0.00207149	0.043497
chr16	23677656	23690367	PLK1	+	1368.57	-0.83547	0.27514	-3.03653	0.00239317	0.0477544
chr1	214603195	214664571	CENPF	+	25476.8	-0.833141	0.241929	-3.44374	0.000573727	0.0175919
chr17	42810134	42833350	BECN1	-	1620.54	-0.830703	0.248702	-3.34016	0.000837316	0.0224247
chr12	120446444	120463749	GATC	+	1846.97	-0.827535	0.250556	-3.3028	0.000957262	0.0248089
chr5	154887411	154938211	GEMIN5	-	2805.95	-0.826025	0.240994	-3.42757	0.000609004	0.0184493
chr3	133573686	133590261	CDV3	+	9968	-0.824456	0.271715	-3.03427	0.00241119	0.0480143
chr22	42508344	42519796	RRP7A	-	2104.05	-0.821239	0.260129	-3.15704	0.00159378	0.0362764
chr18	26226445	26391685	TAF4B	+	1452.2	-0.820389	0.270456	-3.03335	0.00241852	0.0480305
chr13	113297239	113323672	LAMP1	+	9255	-0.819909	0.263123	-3.11607	0.00183276	0.0396981
chr15	59105126	59125045	CCNB2	+	2345.57	-0.815582	0.25229	-3.23272	0.00122619	0.029926
chrX	154762742	154777689	DKC1	+	5075.49	-0.814957	0.241877	-3.36931	0.000753566	0.0209389
chr7	76326799	76358991	YWHAG	-	9369.22	-0.813514	0.243466	-3.34139	0.000833612	0.0223624
chr20	58839718	58911192	GNAS	+	31531.1	-0.811097	0.249898	-3.24571	0.00117159	0.0288861
chr16	46578591	46621379	SHCBP1	-	2863.11	-0.809387	0.249424	-3.24503	0.0011744	0.0289185
chr2	96335766	96377091	NCAPH	+	2723.66	-0.808659	0.240187	-3.36679	0.000760484	0.0209798
chr15	45023147	45077185	SORD	+	866.319	-0.807455	0.265517	-3.04106	0.00235743	0.0472862
chr20	2652593	2658393	NOP56	+	5257	-0.80499	0.240713	-3.34419	0.000825234	0.0222248
chr1	111438638	111441364	ENSG00000243960	-	1696.13	-0.802715	0.257033	-3.123	0.00179016	0.0390262
chr1	205712822	205750182	NUCKS1	-	20683	-0.802326	0.26258	-3.05555	0.00224647	0.0458728
chr19	34428352	34471251	UBA2	+	6782.83	-0.802111	0.242747	-3.3043	0.000952124	0.0247424
chr20	31739271	31801805	TPX2	+	6329.45	-0.799555	0.235807	-3.39072	0.000697098	0.0200414
chr6	85607779	85644063	SYNCRIP	-	7917.85	-0.799551	0.260465	-3.0697	0.00214272	0.0442231
chr2	26308547	26395885	SELENOI	+	4023.55	-0.798405	0.252021	-3.16801	0.00153486	0.0353109
chr1	154962298	154974395	SHC1	-	4378.09	-0.798188	0.247106	-3.23015	0.00123727	0.0300475
chr1	225401502	225428925	LBR	-	4490.22	-0.792979	0.260433	-3.04485	0.00232797	0.0467533
chr11	62689289	62709845	BSCL2	-	1333.96	-0.790352	0.260663	-3.03208	0.00242872	0.0481642
chr2	10120698	10211725	RRM2	+	3636.36	-0.789444	0.24281	-3.25129	0.00114884	0.0284606
chr12	52948871	52952906	KRT18	+	13460	-0.78383	0.251117	-3.12138	0.00180006	0.0391661
chr14	77457870	77469472	AHSA1	+	3464.27	-0.782312	0.254393	-3.07521	0.00210354	0.0437428
chr12	2857680	2877174	FOXM1	-	2751.4	-0.781863	0.253295	-3.08676	0.00202348	0.0428648
chr9	37512547	37592469	ENSG00000256966	-	2958.1	-0.780705	0.249646	-3.12725	0.0017645	0.0387002
chr15	40382721	40394288	KNSTRN	+	2481.81	-0.773105	0.242943	-3.18224	0.00146139	0.0340273
chr2	233833416	233854566	HJURP	-	1442.31	-0.766155	0.248138	-3.08762	0.00201767	0.0427888
chr6	34757505	34773857	SNRPC	+	2665.36	-0.762315	0.24704	-3.0858	0.00203004	0.0429335
chr17	19648136	19685760	ALDH3A2	+	3896.36	-0.750801	0.247754	-3.03044	0.002442	0.048328
chr1	65147549	65232145	AK4	+	2767.41	-0.749874	0.246143	-3.0465	0.00231522	0.0466337
chr13	113584721	113641473	TFDP1	+	4467.95	-0.746263	0.246209	-3.03102	0.00243731	0.0482848
chr12	111842228	111902222	MAPKAPK5	+	2658.99	-0.737	0.23887	-3.08536	0.00203303	0.0429335
chr2	231453531	231483641	NCL	-	18408	-0.734506	0.231606	-3.17136	0.00151728	0.0349901
chr1	229626247	229660200	URB2	+	2855.95	-0.728304	0.239009	-3.04718	0.00231002	0.0465777
chr1	201829149	201884291	IPO9	+	9257.58	-0.713971	0.232556	-3.0701	0.00213988	0.044212
chr6	44246166	44253888	HSP90AB1	+	34274.9	-0.705025	0.230275	-3.06167	0.00220109	0.0451376
chr8	23020133	23069031	TNFRSF10B	-	4907.09	0.751906	0.236099	3.18471	0.00144899	0.0338613
chr1	202724495	202808487	KDM5B	-	5202.65	0.754825	0.241657	3.12353	0.00178694	0.0390128
chr9	17579066	17797124	SH3GL2	+	8566.88	0.760258	0.246748	3.08111	0.00206231	0.043401
chr14	81260652	81436465	STON2	-	5887.47	0.768599	0.236971	3.24343	0.001181	0.0290439
chr3	172630249	172711218	NCEH1	-	2232.27	0.774056	0.252745	3.0626	0.00219426	0.0450454
chr10	68087897	68212017	MYPN	+	15507.8	0.786817	0.248954	3.16049	0.00157503	0.0360362
chr6	25962802	25991231	TRIM38	+	1407.56	0.787578	0.250193	3.14789	0.00164455	0.0372559
chr9	72114595	72257193	GDA	+	10180.8	0.787786	0.252473	3.12028	0.00180679	0.0392681
chr9	114155537	114312511	COL27A1	+	947.789	0.791927	0.258153	3.06767	0.00215738	0.0444306
chr3	41194741	41260096	CTNNB1	+	34882	0.794517	0.247575	3.2092	0.00133103	0.0317207
chr6	37257772	37332970	TBC1D22B	+	1633.4	0.796869	0.258842	3.0786	0.00207979	0.0435231
chr2	144364364	144521057	ZEB2	-	829.377	0.799002	0.261924	3.05051	0.0022845	0.0463183
chr15	31475398	31870789	OTUD7A	-	2285.06	0.800239	0.259527	3.08345	0.00204615	0.043108
chr6	26087281	26098343	HFE	+	1156.05	0.800568	0.258573	3.0961	0.00196083	0.0418715
chr5	73626158	73941993	ARHGEF28	+	3174.41	0.801221	0.255173	3.13991	0.00169002	0.037828
chr18	50560087	50731826	MAPK4	+	18325.6	0.811923	0.241283	3.36502	0.000765379	0.0210846
chr4	169094259	169270956	SH3RF1	-	10216.7	0.814123	0.254543	3.19837	0.00138207	0.0326142
chr12	26971579	27014434	TM7SF3	-	4725.32	0.820541	0.265526	3.09025	0.00199991	0.0425527
chr17	49289206	49362473	ZNF652	-	4002.96	0.831795	0.265307	3.13522	0.00171726	0.0380963
chr10	68827531	68895432	STOX1	+	721.412	0.833164	0.27416	3.03897	0.00237386	0.0474673
chr13	48975912	49209779	FNDC3A	+	18242.1	0.838326	0.262337	3.1956	0.0013954	0.0328883
chr4	39546336	39638902	SMIM14	-	1559.98	0.838897	0.267006	3.14186	0.00167876	0.0376763
chr2	176108790	176119937	HOXD10	+	1633.59	0.84096	0.264597	3.17827	0.00148158	0.0343725
chr11	83455012	85627922	DLG2	-	2948.54	0.841628	0.268512	3.13441	0.00172198	0.0381131
chr15	99251362	99390729	LRRC28	+	935.738	0.842023	0.266823	3.15573	0.00160097	0.0363541
chr8	76980258	77001044	PEX2	-	1083.21	0.843152	0.268022	3.14583	0.00165617	0.0373261
chr7	24698355	24757940	GSDME	-	3873.19	0.844662	0.238802	3.53708	0.000404581	0.013409
chr2	88556741	88691518	EIF2AK3	-	3657.96	0.844663	0.248935	3.3931	0.000691061	0.0199806
chr7	50590063	50793462	GRB10	-	2191.03	0.845495	0.252796	3.34458	0.000824076	0.0222247
chr4	141636583	141733987	IL15	+	3396.4	0.84697	0.279921	3.02574	0.00248023	0.0488836
chr8	43140464	43202855	HGSNAT	+	2497.48	0.851186	0.242292	3.51306	0.000442972	0.0144086
chrX	117897813	118117340	KLHL13	-	22294.3	0.851588	0.250823	3.39518	0.000685829	0.0199573
chr17	1711447	1717174	MIR22HG	-	801.132	0.852701	0.271682	3.1386	0.00169757	0.037828
chr3	98579446	98593648	CPOX	-	817.314	0.853652	0.279592	3.05321	0.00226406	0.046072
chr2	182139968	182523359	PDE1A	-	17691.8	0.855292	0.264846	3.22939	0.00124053	0.0300475
chr14	75649791	75660876	ERG28	-	666.813	0.858291	0.273792	3.13483	0.00171951	0.0381023
chr12	50924969	50970700	ENSG00000289695	+	2993.05	0.862963	0.266193	3.24186	0.0011875	0.0291666
chr11	73264498	73305103	P2RY6	+	6674.4	0.864126	0.269505	3.20634	0.00134434	0.0319588
chr19	43646095	43670547	PLAUR	-	965.551	0.864355	0.273643	3.15869	0.0015848	0.0361574
chr10	58512872	58831435	BICC1	+	7061.37	0.870129	0.272579	3.19221	0.0014119	0.0331961
chr16	18791669	18801572	ARL6IP1	-	3377.81	0.870954	0.274774	3.16971	0.00152593	0.0351475
chr7	44606572	44709066	OGDH	+	8517.07	0.871703	0.262219	3.32434	0.000886295	0.0235076
chr3	149369022	149377692	TM4SF1	-	36365.3	0.87475	0.277763	3.14926	0.00163682	0.0371244
chr1	226631690	226739323	ITPKB	-	1694.18	0.875369	0.253441	3.45394	0.000552463	0.0170758
chr1	85580761	85584589	CCN1	+	1322.15	0.875861	0.27364	3.20078	0.00137055	0.0323819
chr12	50923472	50932510	METTL7A	+	3023	0.877583	0.265875	3.30074	0.000964312	0.024958
chr9	116153791	116402321	PAPPA	+	4399.43	0.877951	0.253324	3.46573	0.000528799	0.0165254
chr22	29767369	29770413	UQCR10	+	1774.34	0.878198	0.268299	3.27321	0.00106333	0.0270483
chr18	23506184	23586506	NPC1	-	3272.14	0.881725	0.23908	3.68799	0.00022603	0.00867019
chr17	76868404	76950393	MGAT5B	+	2995.12	0.882737	0.292137	3.02165	0.00251399	0.0494983
chr4	185585444	185956652	SORBS2	-	10743	0.884463	0.243571	3.63123	0.000282068	0.0102869
chr1	153678688	153693992	NPR1	+	2396.52	0.88487	0.287864	3.07392	0.00211267	0.0437907
chr3	15601341	15722311	BTD	+	1288.67	0.885528	0.24987	3.54395	0.000394181	0.0131321
chr5	173056352	173139284	CREBRF	+	847.321	0.885698	0.283505	3.1241	0.0017835	0.0389825
chr1	99703970	99766635	FRRS1	-	1790.67	0.888103	0.269656	3.29347	0.000989597	0.0254755
chr10	104309698	104338465	ITPRIP	-	3296.07	0.889976	0.260458	3.41696	0.000633234	0.0189605
chr3	81986138	82463675	LINC02008	+	9579.27	0.890169	0.283663	3.13812	0.00170035	0.037828
chr1	241628851	241640369	CHML	-	7442.59	0.891004	0.288842	3.08474	0.00203727	0.0429678
chr17	50426158	50474845	ACSF2	+	1922.27	0.896256	0.27688	3.23699	0.00120799	0.0295191
chr3	189956728	190122437	P3H2	-	7476.57	0.897032	0.250593	3.57964	0.000344068	0.0118147
chr12	119989236	120094494	BICDL1	+	718.768	0.899382	0.270517	3.32467	0.000885224	0.0235076
chr3	185506262	185552588	LIPH	-	402.154	0.900328	0.296821	3.03323	0.00241948	0.0480305
chr15	90529923	90645345	CRTC3	+	6524.79	0.903258	0.261081	3.45969	0.000540797	0.0168232
chr8	144148016	144261927	MROH1	+	2354.09	0.903427	0.298343	3.02815	0.00246052	0.0485946
chr1	145848522	145859836	PIAS3	-	545.446	0.905364	0.293892	3.0806	0.00206583	0.0434275
chr1	197268204	197478455	CRB1	+	3121.14	0.90649	0.259496	3.49328	0.000477128	0.0152364
chr11	95976598	96343195	MAML2	-	3992.98	0.909453	0.286445	3.17497	0.00149852	0.0346405
chr14	54842008	54902826	GCH1	-	546.061	0.909525	0.285672	3.18381	0.0014535	0.0339257
chr12	20368537	20688583	PDE3A	+	71533.9	0.910858	0.279781	3.25561	0.00113148	0.0282366
chr12	19129733	19376400	PLEKHA5	+	736.169	0.911787	0.284231	3.20791	0.00133704	0.0318245
chr22	27748277	27801756	MN1	-	1852.28	0.914538	0.26943	3.39435	0.000687922	0.0199573
chrX	57286706	57489193	FAAH2	+	4375.29	0.917989	0.271963	3.37542	0.000737036	0.0207795
chr7	138594285	138701362	SVOPL	-	4642.88	0.919423	0.268069	3.4298	0.000604031	0.0184038
chr2	237574322	237601614	RAB17	-	1910.32	0.92099	0.259219	3.55295	0.00038094	0.0128466
chr13	20973036	21061586	LATS2	-	4975.71	0.922174	0.254593	3.62216	0.000292158	0.010555
chr13	43213130	43786972	ENOX1	-	3542.65	0.922284	0.262515	3.51326	0.000442644	0.0144086
chr6	31857659	31862905	NEU1	-	1190.84	0.923017	0.261656	3.52759	0.000419358	0.0138037
chr1	207321519	207386804	CD55	+	21797	0.923338	0.255027	3.62055	0.000293983	0.0105812
chr10	121478332	121598458	FGFR2	-	427.703	0.929428	0.285153	3.2594	0.00111649	0.0279936
chr3	53328963	53813733	CACNA1D	+	628.744	0.931645	0.278782	3.34185	0.000832235	0.0223624
chr15	88635670	88656483	ISG20	+	597.23	0.932836	0.297855	3.13185	0.00173709	0.0384034
chr1	180632022	180890279	XPR1	+	7388.81	0.934972	0.26056	3.58831	0.000332823	0.0115683
chr22	30693782	30907824	OSBP2	+	3788.03	0.935218	0.259775	3.60011	0.000318085	0.0111567
chr5	137617500	137736089	KLHL3	-	468.052	0.937963	0.301773	3.10817	0.00188249	0.0405797
chr8	139727725	140458579	TRAPPC9	-	11989.6	0.938921	0.274109	3.42535	0.000613997	0.0185316
chr20	59123381	59259113	ZNF831	+	22331.7	0.939652	0.236479	3.97352	7.08181e-05	0.0034966
chr8	8234341	8244667	ALG1L13P	-	1419.55	0.941459	0.262049	3.59268	0.000327294	0.0113967
chr3	100492619	100577444	TMEM45A	+	2469.71	0.942638	0.250055	3.76972	0.000163431	0.00679705
chrX	150361422	150514178	MAMLD1	+	4387.72	0.9428	0.268911	3.506	0.000454903	0.0146973
chr3	122886941	122892416	LINC02035	+	372.566	0.943311	0.294339	3.20485	0.00135135	0.0320463
chr21	34787801	36004667	RUNX1	-	1472.89	0.943367	0.261199	3.61167	0.000304229	0.0108687
chr7	144451941	144836395	TPK1	-	5490.09	0.943732	0.277828	3.39682	0.000681732	0.0199505
chr16	58059	76355	RHBDF1	-	732.806	0.945637	0.300967	3.142	0.001678	0.0376763
chr6	105993463	106109939	PRDM1	+	561.916	0.946203	0.279614	3.38396	0.000714481	0.0202921
chr17	60677453	61392838	BCAS3	+	2998.44	0.946824	0.26451	3.57954	0.000344206	0.0118147
chrX	31097677	33339609	DMD	-	7000.84	0.947623	0.261508	3.62369	0.000290429	0.0105122
chrX	16946658	17153272	REPS2	+	606.731	0.949545	0.278594	3.40835	0.000653575	0.0194261
chr6	44000580	44007612	C6orf223	+	1125.41	0.951633	0.274007	3.47303	0.000514617	0.0162184
chr5	24487100	24644978	CDH10	-	11859.8	0.954405	0.290184	3.28897	0.00100555	0.0258517
chr3	190514051	190659750	IL1RAP	+	12220.3	0.9548	0.260061	3.67144	0.000241187	0.0090709
chr3	37381062	37440186	APRG1	+	672.072	0.954909	0.289068	3.3034	0.000955199	0.0247888
chr6	14117256	14136918	CD83	+	4620.31	0.955095	0.249846	3.82274	0.000131978	0.00572381
chr1	631074	632616	MTCO1P12	+	2779.14	0.956062	0.265515	3.60079	0.000317256	0.0111567
chr1	209614870	209652425	LAMB3	-	2636.14	0.958071	0.267427	3.58255	0.000340255	0.0117412
chr4	139716753	140154184	MAML3	-	726.111	0.959132	0.290832	3.29789	0.000974126	0.0251108
chr7	1530702	1543043	MAFK	+	2747.05	0.962107	0.295938	3.25104	0.00114983	0.0284606
chr4	111804418	112112273	LINC02945	-	7679.05	0.963252	0.283813	3.39397	0.000688868	0.0199573
chr12	104303739	104305205	EID3	+	292.403	0.964058	0.3092	3.11791	0.00182141	0.0395331
chr10	32958437	33082409	ITGB1-DT	+	447.551	0.965791	0.29283	3.29813	0.000973321	0.0251108
chr14	73237497	73274640	PAPLN	+	507.062	0.966038	0.291625	3.3126	0.000924326	0.0242491
chr3	30606601	30694142	TGFBR2	+	1780.19	0.967263	0.248906	3.88606	0.000101884	0.00467792
chr9	113876282	114056593	ZNF618	+	737.062	0.968229	0.285631	3.38978	0.000699478	0.0200732
chr11	17493895	17544416	USH1C	-	2341.02	0.973202	0.262434	3.70837	0.000208598	0.00811467
chr1	56494761	56645301	PLPP3	-	689.823	0.973445	0.271392	3.58687	0.000334677	0.0116118
chr3	178960121	179072215	ZMAT3	-	8248.87	0.975698	0.276059	3.53438	0.000408728	0.0135231
chr15	38252836	38357249	SPRED1	+	1120.25	0.977097	0.304819	3.2055	0.0013483	0.0320133
chr2	36531805	36646087	FEZ2	-	2981.26	0.977848	0.260761	3.74998	0.000176847	0.00724548
chr12	106301929	106347003	TCP11L2	+	387.272	0.981082	0.303842	3.22893	0.00124256	0.0300587
chr17	45221444	45247319	FMNL1	+	2890.15	0.98163	0.275393	3.56448	0.000364585	0.0124256
chrX	141934496	142740581	ENSG00000288098	+	8800.05	0.983549	0.267204	3.68089	0.000232423	0.0088275
chr10	99659509	99711241	ENTPD7	+	2016.25	0.985238	0.249879	3.94286	8.05159e-05	0.0039251
chr6	31927698	31952048	ENSG00000244255	+	704.907	0.985988	0.265022	3.7204	0.000198907	0.00783183
chr2	46293667	46386697	EPAS1	+	4219.45	0.993813	0.248727	3.9956	6.45294e-05	0.00323588
chr5	150601080	150659207	SYNPO	+	2025.44	0.996721	0.267052	3.7323	0.000189736	0.00756993
chr14	26599755	27295516	ENSG00000258081	+	9888	0.997017	0.295594	3.37292	0.000743743	0.0208328
chr12	53708517	53727745	CALCOCO1	-	1173.59	0.997995	0.26266	3.79956	0.000144951	0.00616153
chr7	116287380	116508541	CAV2	+	990.464	0.998663	0.301732	3.30977	0.000933717	0.0243657
chr7	110662644	111562517	IMMP2L	-	99719.4	1.00077	0.282139	3.54708	0.000389519	0.0130445
chr13	43607313	43629464	ENSG00000287842	-	323.283	1.00297	0.323955	3.09602	0.00196137	0.0418715
chr5	44742420	44808777	MRPS30-DT	-	674.465	1.00528	0.302996	3.31779	0.000907324	0.0239663
chr4	108742048	108763054	ETNPPL	-	617.537	1.00915	0.324882	3.10621	0.00189505	0.0407721
chr3	136818647	136855888	SLC35G2	+	681.544	1.01015	0.283204	3.56686	0.000361281	0.0123348
chr8	142700111	142705127	LY6K	+	2924.49	1.01287	0.304797	3.3231	0.000890215	0.0235791
chrX	17375200	17735994	NHS	+	13490	1.01417	0.242315	4.18534	2.84738e-05	0.00169226
chrM	5904	7445	MT-CO1	+	47904.7	1.01557	0.305244	3.32709	0.000877575	0.0233703
chr3	36826819	36945057	TRANK1	-	665.766	1.02015	0.269775	3.78149	0.000155895	0.00651176
chr2	96143169	96145440	DUSP2	-	1961.9	1.02163	0.33517	3.04809	0.00230302	0.0465339
chr1	213051233	213274774	RPS6KC1	+	9518.88	1.02201	0.26546	3.84996	0.000118137	0.00521753
chr8	124450820	124462150	TRMT12	+	314.871	1.0245	0.305312	3.35558	0.000791979	0.0215705
chr16	69703065	69704652	ENSG00000260772	+	263.835	1.0259	0.336031	3.05298	0.0022658	0.046072
chr12	12891559	12917937	GPRC5A	+	4872.6	1.0267	0.237979	4.31425	1.60147e-05	0.00103831
chr9	99104038	99154192	TGFBR1	+	18647.1	1.0273	0.261955	3.92167	8.79382e-05	0.00420183
chr19	3594507	3606875	TBXA2R	-	589.569	1.03266	0.326754	3.16036	0.00157574	0.0360362
chr1	110362851	110391082	SLC16A4	-	767.903	1.0339	0.285496	3.62142	0.000292988	0.0105651
chr14	70425812	70547464	ENSG00000257759	-	229.76	1.03472	0.336132	3.07833	0.00208168	0.0435231
chr1	192809039	192812275	RGS2	+	1060.69	1.0366	0.299788	3.45776	0.00054468	0.0168895
chr11	1554051	1572271	DUSP8	-	681.993	1.04203	0.343496	3.03361	0.00241645	0.0480305
chr18	3347696	3383532	LINC01895	-	1437.57	1.04238	0.24949	4.17806	2.94011e-05	0.00172082
chr1	78649796	78664078	IFI44	+	217.994	1.04255	0.342991	3.0396	0.00236892	0.0474179
chr14	72969451	73027131	ZFYVE1	-	457.471	1.04285	0.321844	3.24024	0.0011943	0.0292961
chr16	57610652	57665580	ADGRG1	+	564.571	1.0477	0.280074	3.74082	0.000183424	0.00740465
chr8	30384511	30572256	RBPMS	+	1090	1.0485	0.26982	3.88592	0.000101943	0.00467792
chr8	80628451	80874781	ZNF704	-	1232.86	1.04916	0.266061	3.9433	8.03664e-05	0.0039251
chr9	98199011	98255649	TBC1D2	-	598.906	1.05012	0.307913	3.41045	0.000648553	0.0193321
chr16	84294846	84329844	WFDC1	+	1490.6	1.05134	0.2622	4.00968	6.08011e-05	0.00309732
chr17	15229773	15272292	PMP22	-	2668.07	1.05195	0.243329	4.32316	1.53809e-05	0.00100059
chr5	52787916	52959209	ITGA1	+	6756.35	1.05365	0.257048	4.09903	4.14877e-05	0.00229565
chr10	116671192	116850251	HSPA12A	-	257.841	1.05535	0.322041	3.27706	0.00104893	0.0268236
chr1	36306368	36329340	SH3D21	+	466.335	1.05712	0.311194	3.39698	0.000681327	0.0199505
chr20	34872146	34927962	ACSS2	+	1866.97	1.05818	0.25957	4.07668	4.56839e-05	0.002485
chr17	67377281	67697256	PITPNC1	+	4646.33	1.05878	0.274932	3.85106	0.000117608	0.00520611
chr18	24138987	24161600	CABYR	+	693.36	1.05906	0.287428	3.6846	0.00022906	0.00872325
chr5	795605	858973	ZDHHC11	-	4800.93	1.05974	0.280115	3.78323	0.000154806	0.00648031
chr11	694438	727727	EPS8L2	+	2010.05	1.06252	0.313367	3.39066	0.000697239	0.0200414
chr7	8113184	8262687	ICA1	-	342.282	1.06807	0.302617	3.52944	0.000416444	0.0137312
chr5	14704800	14871778	ANKH	-	3539.1	1.06812	0.241763	4.41806	9.95888e-06	0.000702448
chr6	31945650	31952086	CFB	+	675.077	1.06879	0.268143	3.9859	6.72255e-05	0.00333633
chr1	248681249	248748349	ENSG00000286015	-	329.791	1.06889	0.335433	3.18659	0.00143959	0.0337235
chr12	13196723	13219941	EMP1	+	190.563	1.0689	0.35165	3.03968	0.00236826	0.0474179
chr18	63476958	63505085	SERPINB5	+	939.894	1.07002	0.297379	3.59817	0.000320465	0.0112155
chr21	45073853	45226560	ADARB1	+	8694.8	1.07012	0.240091	4.45714	8.30608e-06	0.000610465
chr10	35126791	35212958	CREM	+	1362.72	1.07089	0.255114	4.19771	2.69632e-05	0.00162251
chrX	134796395	134854835	PABIR3	+	1731.98	1.07115	0.256709	4.17262	3.01117e-05	0.00173812
chr18	24725762	24986980	ENSG00000266573	+	616.12	1.07209	0.29473	3.63753	0.000275263	0.0100769
chr1	185157080	185291781	SWT1	+	681.16	1.07359	0.282243	3.80379	0.000142499	0.00608416
chr8	140023724	140096538	ENSG00000289741	-	699.495	1.07569	0.28917	3.71991	0.000199294	0.00783183
chr4	38966744	39032922	TMEM156	-	226.924	1.0757	0.346666	3.10299	0.00191578	0.0410451
chr8	74320613	74518007	GDAP1	+	5425.99	1.07798	0.279414	3.85799	0.000114322	0.00509491
chr1	201539127	201826969	NAV1	+	4208.89	1.07851	0.290777	3.70907	0.000208019	0.00810852
chrX	108439838	108697545	COL4A5	+	21803.9	1.08104	0.250952	4.30777	1.64912e-05	0.00105851
chr12	56521820	56596193	RBMS2	+	2197.54	1.08471	0.277571	3.90786	9.31191e-05	0.00439486
chr4	86886472	86936178	ENSG00000285458	-	829.058	1.08577	0.271891	3.99342	6.51269e-05	0.00325736
chr20	10172395	10308258	SNAP25	+	8580.59	1.08803	0.245368	4.43427	9.23868e-06	0.000666292
chr2	217799588	218033982	TNS1	-	2575.4	1.08844	0.283043	3.84548	0.000120319	0.00528963
chr17	50184101	50201632	COL1A1	-	3177.11	1.08873	0.300986	3.6172	0.000297803	0.0106987
chr12	57128483	57213361	LRP1	+	3200.46	1.09575	0.283944	3.85905	0.00011383	0.00508638
chr16	89921392	89938761	TUBB3	+	312	1.09603	0.350075	3.13085	0.00174299	0.038433
chrX	18425583	18653629	CDKL5	+	2555.35	1.09768	0.244454	4.49034	7.11084e-06	0.000532787
chr2	232378724	232382889	ALPP	+	504.171	1.09806	0.289097	3.79825	0.000145721	0.00617262
chr12	120210439	120265771	PXN	-	1804.63	1.09955	0.310593	3.54017	0.000399874	0.0132758
chr3	111732497	111976517	PHLDB2	+	8845.75	1.10026	0.249254	4.41423	1.01372e-05	0.000709827
chr8	48917598	48921740	SNAI2	-	617.092	1.10186	0.301032	3.66027	0.000251948	0.00939259
chr12	12357078	12471233	BORCS5	+	1899.19	1.10259	0.254709	4.32884	1.49898e-05	0.00098178
chr3	122795069	122881139	SLC49A4	+	2736.41	1.10429	0.25332	4.35928	1.30493e-05	0.000870057
chrM	7586	8269	MT-CO2	+	20554.2	1.1049	0.333638	3.31167	0.000927401	0.0242903
chr4	122826708	122898236	FGF2	+	1214.32	1.11014	0.284886	3.89679	9.74743e-05	0.00452281
chr4	78551747	78610451	ANXA3	+	507.357	1.11089	0.299077	3.71439	0.000203696	0.00798596
chr7	111726110	112206407	DOCK4	-	4494.5	1.11096	0.265751	4.18045	2.90938e-05	0.00171748
chr7	7968796	8094272	GLCCI1	+	6057.57	1.1132	0.275916	4.03455	5.47066e-05	0.00283944
chr10	87751512	87841361	ATAD1	-	12456.5	1.11829	0.268735	4.16129	3.16451e-05	0.00181357
chr12	130953907	131141469	ADGRD1	+	2039.03	1.11835	0.278898	4.00988	6.07486e-05	0.00309732
chr17	64449037	64468643	MILR1	+	3160.62	1.1188	0.247152	4.5268	5.98845e-06	0.000459417
chr8	126552443	126558478	LRATD2	-	795.323	1.12028	0.295462	3.79162	0.00014967	0.00630646
chr17	68420948	68457513	WIPI1	-	750.214	1.12116	0.26863	4.17361	2.99805e-05	0.00173812
chr12	106063345	106138954	NUAK1	-	659.398	1.12452	0.276218	4.07114	4.67832e-05	0.00252489
chr12	113422380	113438276	SDSL	+	313.283	1.12736	0.359535	3.1356	0.00171503	0.0380907
chr5	158695916	159099916	EBF1	-	3230.75	1.12809	0.264206	4.26973	1.95708e-05	0.00123156
chr1	112396214	112463456	CTTNBP2NL	+	2182.18	1.13	0.252202	4.48055	7.44516e-06	0.0005514
chr16	87773304	87779374	ENSG00000260498	-	496.959	1.13008	0.30144	3.74893	0.00017759	0.00726044
chr1	110150494	110202202	SLC6A17	+	364.457	1.13198	0.317638	3.56373	0.000365615	0.0124387
chrM	10059	10404	MT-ND3	+	5189.57	1.13238	0.281151	4.02767	5.63329e-05	0.00290817
chr6	31114750	31140092	PSORS1C1	+	484.677	1.13391	0.338958	3.34529	0.000821972	0.022199
chr8	100337595	100350707	ENSG00000253217	+	568.244	1.13519	0.321627	3.52951	0.000416332	0.0137312
chr12	80099537	80380880	OTOGL	+	897.42	1.13692	0.268816	4.22934	2.34373e-05	0.00142369
chr10	68477998	68527523	SLC25A16	-	4459.58	1.13697	0.236071	4.81621	1.46311e-06	0.000141576
chr1	196651754	196752476	CFH	+	306.07	1.13779	0.337928	3.36695	0.000760049	0.0209798
chr5	66596380	67169593	MAST4	+	1386.81	1.13875	0.27248	4.17919	2.9255e-05	0.00171748
chr1	196651852	196795393	ENSG00000289697	+	306.988	1.14408	0.337847	3.38637	0.000708247	0.0202044
chr6	117453817	117569858	DCBLD1	+	2140	1.14779	0.24774	4.63303	3.60347e-06	0.000301689
chr1	97077743	97995000	DPYD	-	8560.81	1.15577	0.294678	3.92215	8.7761e-05	0.00420183
chr12	54395261	54419266	ITGA5	-	527.836	1.16113	0.278941	4.16263	3.146e-05	0.00180834
chr19	3538261	3574290	MFSD12	-	22031.9	1.16278	0.295767	3.9314	8.44519e-05	0.00405538
chr11	64917553	64934475	PPP2R5B	+	390.974	1.16823	0.347841	3.35852	0.000783613	0.0214641
chr9	2421597	2622457	VLDLR-AS1	-	768.537	1.16915	0.285805	4.09072	4.30029e-05	0.0023659
chr15	39588357	39782841	FSIP1	-	518.127	1.17088	0.3143	3.72536	0.000195038	0.00771182
chr16	370788	387113	PGAP6	-	590.081	1.17154	0.376508	3.11161	0.00186072	0.0402585
chr17	45247916	45269824	MAP3K14-AS1	+	289.816	1.17163	0.322789	3.62969	0.000283757	0.010329
chr14	54566117	54793315	SAMD4A	+	2115.48	1.17198	0.269682	4.34579	1.38778e-05	0.00091832
chr8	92699742	92879502	FLJ46284	-	216.077	1.17673	0.365367	3.22067	0.0012789	0.0305919
chr12	48337180	48351414	ZNF641	-	2240.26	1.17801	0.252862	4.6587	3.1821e-06	0.000272331
chr5	132311285	132370170	MIR3936HG	-	3564.75	1.18209	0.269463	4.38684	1.15008e-05	0.000790393
chr10	87862638	87971930	PTEN	+	19750.3	1.18288	0.284642	4.15567	3.24331e-05	0.00184773
chr2	131591752	131628147	POTEKP	+	1735.8	1.18344	0.278435	4.25034	2.13447e-05	0.00132159
chr1	30869466	30908758	SDC3	-	927.688	1.18346	0.317377	3.72888	0.000192329	0.00763605
chr19	39406847	39409412	ZFP36	+	182.454	1.18588	0.376903	3.14638	0.00165305	0.0373261
chr18	3593732	3598363	DLGAP1-AS1	+	686.824	1.18647	0.2717	4.36684	1.26059e-05	0.00084874
chr12	10158301	10172138	OLR1	-	1759.93	1.18857	0.293289	4.05254	5.06637e-05	0.00268017
chr1	85482281	85578250	ENSG00000282057	-	419.804	1.1901	0.3025	3.9342	8.34753e-05	0.00402857
chr13	44399540	44405984	TUSC8	-	616.594	1.19884	0.271184	4.42076	9.83564e-06	0.000698255
chr17	9644698	9729687	USP43	+	2580.07	1.20062	0.256982	4.672	2.98283e-06	0.000258727
chr2	174431571	174487094	GPR155	-	2735.87	1.20482	0.256603	4.69527	2.6625e-06	0.000235179
chr6	75749201	75919537	MYO6	+	2424.52	1.20635	0.278964	4.3244	1.52947e-05	0.000998354
chr4	88709298	88730103	FAM13A-AS1	+	149.792	1.20965	0.370663	3.26349	0.00110051	0.0277375
chr1	9148011	9198906	MIR34AHG	-	1300.9	1.21202	0.292462	4.1442	3.41e-05	0.00193126
chr17	45190931	45222222	FMNL1-DT	-	852.789	1.21439	0.299121	4.05986	4.91027e-05	0.00263376
chr7	141074064	141480380	TMEM178B	+	8765.63	1.21477	0.262949	4.61981	3.84099e-06	0.000318803
chr14	99971449	100144236	EVL	+	3589.04	1.21717	0.250893	4.85136	1.22615e-06	0.000121081
chr9	110365248	110579880	SVEP1	-	963.653	1.21795	0.271489	4.48618	7.25129e-06	0.000541205
chr5	102753981	103029730	PAM	+	12831.8	1.22124	0.267103	4.57218	4.82676e-06	0.000388888
chrX	17528435	17587160	ENSG00000235834	+	1574.34	1.22283	0.257077	4.75667	1.96808e-06	0.000185772
chr9	99821855	99866891	NR4A3	+	1785.75	1.22355	0.255188	4.7947	1.62919e-06	0.000156078
chr1	168695874	169103296	ENSG00000285622	-	298.549	1.22361	0.359673	3.402	0.000668952	0.019743
chr3	149377778	149386583	TM4SF1-AS1	+	166.853	1.22398	0.363085	3.37107	0.000748774	0.0208962
chr2	28956611	29052230	TOGARAM2	+	422.685	1.22429	0.34504	3.54825	0.000387807	0.0130325
chr19	676392	683392	FSTL3	+	8631.9	1.22974	0.297686	4.13099	3.612e-05	0.00202778
chr5	96390333	96434143	PCSK1	-	7176.62	1.23021	0.249234	4.93598	7.97473e-07	8.25599e-05
chr12	87782163	87784568	MKRN9P	-	147.548	1.23432	0.37949	3.25257	0.00114367	0.0284162
chr7	140084746	140176983	KDM7A	-	752.135	1.23599	0.26668	4.63473	3.5741e-06	0.000300537
chr11	111768668	111778364	ENSG00000254990	-	111.05	1.23599	0.406816	3.03821	0.00237989	0.0475385
chr11	86791059	86952910	PRSS23	+	8272.24	1.23606	0.251468	4.91538	8.86114e-07	9.1246e-05
chr5	84382424	84490765	EDIL3-DT	+	173.547	1.23914	0.366885	3.37745	0.00073161	0.020687
chr1	6247353	6261098	GPR153	-	126.025	1.23925	0.405156	3.05869	0.00222305	0.0454427
chr22	29073035	29168333	KREMEN1	+	418.159	1.24058	0.322448	3.84738	0.000119388	0.00526074
chr8	29333064	29350684	DUSP4	-	180.17	1.24104	0.355538	3.4906	0.000481933	0.015339
chr5	173707614	173746279	LINC01484	-	1051.62	1.24171	0.284059	4.3713	1.23506e-05	0.00083447
chr11	104942866	104969366	CASP4	-	1111.29	1.24677	0.277529	4.4924	7.04263e-06	0.000529738
chr4	1793293	1808872	FGFR3	+	221.77	1.2483	0.383774	3.25269	0.00114317	0.0284162
chr6	151656691	152129619	ESR1	+	2229.49	1.24848	0.255614	4.88424	1.03828e-06	0.00010413
chr11	124115404	124147721	VWA5A	+	288.68	1.25186	0.328246	3.81378	0.000136858	0.00591818
chr20	5544439	5611006	GPCPD1	-	6489.66	1.25557	0.253486	4.95323	7.29906e-07	7.72256e-05
chr2	85598547	85603196	TMEM150A	-	177.25	1.26837	0.366601	3.45981	0.000540558	0.0168232
chr4	86924630	86936202	ENSG00000284968	-	459.332	1.27059	0.292011	4.35118	1.35409e-05	0.000899118
chr7	124743885	124765792	GPR37	-	1383.75	1.2746	0.255879	4.98128	6.31646e-07	6.87174e-05
chr3	146192335	146251179	PLSCR4	-	968.523	1.27906	0.298384	4.28661	1.81417e-05	0.00114913
chrX	139581770	139708216	MCF2	-	1213.66	1.28074	0.269484	4.75258	2.00838e-06	0.000187795
chr9	16409503	16870843	BNC2	-	5868.48	1.28239	0.271763	4.7188	2.37245e-06	0.000212483
chr10	18140424	18543557	CACNB2	+	15703.3	1.2842	0.266199	4.82422	1.40554e-06	0.000136692
chr17	1633858	1645744	SCARF1	-	113.177	1.28619	0.409771	3.1388	0.0016964	0.037828
chr21	44999208	45004727	PICSAR	-	278.68	1.28858	0.363247	3.54739	0.000389071	0.0130445
chr20	44656451	44696096	ENSG00000132832	-	463.165	1.2926	0.304043	4.25137	2.12464e-05	0.00131974
chr2	101345550	101387503	CREG2	-	1290.24	1.29275	0.263705	4.90225	9.47468e-07	9.65315e-05
chr8	56300005	56320776	SDR16C5	-	210.516	1.29328	0.358758	3.60487	0.000312312	0.0110753
chr3	186046314	186110318	ETV5	-	577.374	1.29511	0.273004	4.74392	2.09624e-06	0.000192717
chr3	161600438	161735399	ENSG00000288087	+	439.734	1.29594	0.315176	4.11179	3.92607e-05	0.00217869
chr7	27830573	28180795	JAZF1	-	549.016	1.30754	0.280239	4.6658	3.07425e-06	0.000264275
chr1	185734391	186190949	HMCN1	+	163.35	1.3127	0.386039	3.40042	0.000672814	0.0197797
chr1	168903905	169087005	LINC00970	-	237.157	1.31417	0.357296	3.67809	0.00023499	0.0089074
chrM	9207	9990	MT-CO3	+	60466.1	1.31501	0.32507	4.0453	5.22565e-05	0.00274932
chr12	46388856	46392126	ENSG00000275481	+	151.759	1.31535	0.428431	3.07015	0.00213954	0.044212
chr5	172768096	172771195	DUSP1	-	3760.66	1.31925	0.282364	4.67217	2.9804e-06	0.000258727
chr1	246724409	246768137	SCCPDH	+	550.218	1.32446	0.304987	4.34267	1.4076e-05	0.000925077
chr16	84819985	84920768	CRISPLD2	+	411.128	1.32719	0.316936	4.18758	2.81946e-05	0.00168486
chr1	204218853	204377665	PLEKHA6	-	385.986	1.32961	0.327654	4.05796	4.9504e-05	0.00264058
chr20	36306336	36528637	DLGAP4	+	608.256	1.33505	0.350096	3.81339	0.000137075	0.00591818
chr10	67796669	67838188	DNAJC12	-	119.335	1.34167	0.443253	3.02687	0.00247103	0.0487522
chr15	66860303	66867023	ENSG00000277152	+	146.376	1.34326	0.439705	3.05491	0.00225126	0.0459219
chr14	67533290	67589612	PLEKHH1	+	2242	1.3449	0.252354	5.32942	9.8529e-08	1.36495e-05
chr9	35104112	35116341	FAM214B	-	593.438	1.34728	0.29761	4.52701	5.98243e-06	0.000459417
chr5	94703690	95285094	MCTP1	-	129.29	1.35075	0.398	3.39383	0.000689219	0.0199573
chr13	109269634	109278512	ENSG00000275216	+	837.997	1.35195	0.263084	5.13886	2.76404e-07	3.43383e-05
chr11	102317450	102339403	BIRC3	+	949.087	1.35207	0.304328	4.44279	8.87982e-06	0.000647688
chr2	113211421	113276581	PAX8-AS1	+	197.318	1.35221	0.357097	3.78669	0.00015267	0.00641881
chr1	221701424	221742089	DUSP10	-	258.368	1.35363	0.323885	4.17936	2.92327e-05	0.00171748
chr19	48047843	48110817	PLA2G4C	-	272.239	1.35433	0.320147	4.23035	2.33331e-05	0.00142184
chr1	151841877	151850385	C2CD4D-AS1	+	291.241	1.35555	0.310968	4.35913	1.30581e-05	0.000870057
chr2	25227855	25342590	DNMT3A	-	530.518	1.35606	0.3086	4.39422	1.1117e-05	0.000772809
chr9	128191655	128255248	DNM1	+	200.671	1.35645	0.395764	3.42742	0.000609357	0.0184493
chr15	94231538	94483952	MCTP2	+	7757.07	1.35705	0.261109	5.19725	2.0226e-07	2.52904e-05
chr5	173888349	173961980	CPEB4	+	13033.8	1.35711	0.26463	5.12833	2.92316e-07	3.60823e-05
chr6	9596110	10211608	OFCC1	-	199.123	1.36084	0.388044	3.50693	0.000453304	0.0146703
chr17	69147214	69244846	ABCA10	-	476.401	1.36176	0.307493	4.42858	9.48541e-06	0.000679
chr2	38203363	38239590	ENSG00000227292	-	190.626	1.36361	0.35471	3.84428	0.000120905	0.00530332
chr4	94757955	95158448	BMPR1B	+	496.796	1.36532	0.331951	4.11303	3.90502e-05	0.00217327
chr2	229357629	229714555	DNER	-	5607.68	1.36652	0.236741	5.77222	7.82318e-09	1.34503e-06
chr16	88663298	88687282	SNAI3-AS1	+	518.661	1.37154	0.323985	4.23335	2.30234e-05	0.00140914
chr2	187464230	187565760	TFPI	-	4181.22	1.37251	0.291895	4.70207	2.57536e-06	0.000229589
chr3	129087569	129122801	RAB43	-	387.104	1.37841	0.354809	3.88492	0.000102363	0.00468196
chr12	19775451	20012261	ENSG00000255910	+	1687.44	1.37933	0.297508	4.63627	3.54747e-06	0.000300537
chr12	56007659	56038435	IKZF4	+	118.518	1.38048	0.422228	3.26952	0.00107729	0.027331
chr3	4979437	4985323	BHLHE40	+	752.36	1.38184	0.306814	4.50385	6.67347e-06	0.000505923
chr1	218345336	218444619	TGFB2	+	363.541	1.38599	0.303313	4.56951	4.88871e-06	0.000388996
chr1	46175073	46185962	TSPAN1	+	131.76	1.3881	0.401274	3.45923	0.000541725	0.0168249
chr3	141876124	141926549	ATP1B3	+	20362.7	1.39145	0.251746	5.5272	3.25387e-08	5.09403e-06
chr14	64535905	64546173	HSPA2	+	193.593	1.39421	0.403878	3.45206	0.000556319	0.01714
chr12	52022832	52059507	NR4A1	+	1349.37	1.39499	0.330451	4.22147	2.42709e-05	0.00146508
chr7	43582758	43650713	STK17A	+	1913.17	1.39646	0.261552	5.33913	9.33923e-08	1.32232e-05
chr9	17906563	18910950	ADAMTSL1	+	751.899	1.39671	0.315541	4.42641	9.5815e-06	0.000683338
chr5	125333369	126368755	ENSG00000248752	-	440.614	1.3972	0.308314	4.53175	5.84974e-06	0.000454204
chr7	38239580	38249572	TRGC2	-	196.601	1.39792	0.373978	3.73798	0.000185504	0.00744388
chr7	138706294	138799560	ATP6V0A4	-	517.925	1.39862	0.281228	4.97325	6.58403e-07	7.11109e-05
chr2	142877657	143055833	KYNU	+	23490.5	1.39865	0.259165	5.39675	6.78588e-08	1.02889e-05
chr2	189031898	189225312	COL5A2	-	147.043	1.40126	0.384822	3.64133	0.000271232	0.0099863
chr18	54717860	54895516	RAB27B	+	1062.17	1.40363	0.300337	4.67353	2.96064e-06	0.000258727
chr5	21616262	21779522	ENSG00000253766	+	227.923	1.4058	0.345321	4.07101	4.68106e-05	0.00252489
chr2	131637025	131649615	LINC01087	+	733.021	1.40933	0.318841	4.42015	9.86319e-06	0.000698255
chr8	19901717	19967259	LPL	+	5507.69	1.41574	0.249898	5.66528	1.46783e-08	2.3953e-06
chr9	12698554	12814377	LURAP1L-AS1	-	139.788	1.41638	0.433789	3.26513	0.00109416	0.0276497
chr15	38865322	39427195	ENSG00000259345	-	500.381	1.41639	0.294381	4.8114	1.49879e-06	0.000144303
chr8	123497889	123541206	FBXO32	-	201.847	1.41987	0.347519	4.08572	4.39399e-05	0.00241056
chr3	141228726	141367753	PXYLP1	+	696.403	1.42285	0.26674	5.33423	9.59501e-08	1.34862e-05
chr13	113953705	113974076	C13orf46	-	127.989	1.42594	0.469724	3.0357	0.00239979	0.0478368
chr2	8678845	8684461	ID2	+	382.427	1.42826	0.350494	4.07499	4.60171e-05	0.00249607
chr7	76090431	76108779	GTF2IP7	-	141.601	1.43211	0.392085	3.65255	0.000259653	0.00961514
chr5	83940554	84384880	EDIL3	-	1571.63	1.4331	0.294929	4.85912	1.17906e-06	0.000117031
chr6	2851230	2881407	SERPINB9P1	-	232.02	1.44669	0.336288	4.30193	1.69314e-05	0.00107957
chr17	75587800	75626849	MYO15B	+	155.492	1.4496	0.417169	3.47485	0.000511131	0.016135
chr2	225399710	225729887	NYAP2	+	4308.72	1.46703	0.290733	5.04598	4.5121e-07	5.26576e-05
chr6	7726099	7881728	BMP6	+	6791.29	1.46769	0.238078	6.16474	7.05985e-10	1.41609e-07
chrX	23783278	23783367	ENSG00000288706	+	82.762	1.47539	0.457155	3.22733	0.0012495	0.0301566
chr6	160272617	160276130	ENSG00000230234	+	191.406	1.47799	0.346522	4.2652	1.99719e-05	0.0012527
chr11	61258286	61295316	VWCE	-	546.463	1.48051	0.325849	4.54356	5.53123e-06	0.000431212
chr12	46383433	46876784	SLC38A4-AS1	+	3914.63	1.48103	0.283497	5.22415	1.7496e-07	2.23114e-05
chr12	20014780	20098868	LINC02398	+	395.49	1.48165	0.337986	4.38374	1.16657e-05	0.000793759
chr6	32937364	32953122	ENSG00000248993	-	153.228	1.48389	0.44787	3.31321	0.000922321	0.0242491
chrM	15888	15953	MT-TT	+	117.274	1.49321	0.443101	3.36991	0.000751922	0.0209234
chr2	39168045	39243983	CDKL4	-	86.1334	1.49543	0.449518	3.32674	0.000878693	0.0233703
chr1	150508062	150513789	ECM1	+	119.099	1.4967	0.4089	3.66032	0.000251903	0.00939259
chr7	88270892	88306894	STEAP4	-	6558.08	1.50096	0.249475	6.01648	1.78251e-09	3.33243e-07
chr8	100475667	100501148	ENSG00000253666	+	143.411	1.51504	0.387819	3.90656	9.36213e-05	0.00440776
chr11	123358428	123627774	GRAMD1B	+	9265.26	1.51824	0.244375	6.21276	5.20617e-10	1.06649e-07
chr17	9822206	9892099	GLP2R	+	3610.78	1.52162	0.238529	6.37918	1.78039e-10	4.08133e-08
chr1	230057990	230282122	GALNT2	+	14954.3	1.52273	0.234451	6.49487	8.31043e-11	2.07826e-08
chr3	186930325	187078553	ST6GAL1	+	5140.64	1.52363	0.236045	6.45483	1.08343e-10	2.64082e-08
chr5	16473038	16617101	RETREG1	-	669.763	1.5238	0.284841	5.34966	8.81203e-08	1.2663e-05
chr1	210328252	210676296	HHAT	+	705.496	1.52667	0.267989	5.69676	1.22102e-08	2.03584e-06
chr21	15368966	15627342	ENSG00000229425	-	703.044	1.52699	0.302699	5.0446	4.54475e-07	5.27191e-05
chr7	137381037	137847092	DGKI	-	104.42	1.52922	0.426906	3.5821	0.000340847	0.0117412
chr5	710355	784729	ZDHHC11B	-	577.067	1.53216	0.299486	5.11598	3.12124e-07	3.80396e-05
chr17	7036015	7040117	SLC16A13	+	120.369	1.53248	0.494025	3.10202	0.00192203	0.0411229
chr7	95583499	95596516	PDK4	-	1703.72	1.53673	0.332204	4.62587	3.73037e-06	0.000310961
chr10	87859158	87863533	KLLN	-	84.6303	1.53815	0.457859	3.35945	0.000780984	0.0214226
chr6	2617144	2640001	LINC02521	+	82.7873	1.54108	0.455395	3.38405	0.000714248	0.0202921
chr19	47403124	47419527	MEIS3	-	164.706	1.54373	0.433712	3.55935	0.000371775	0.0125595
chr1	28239509	28241453	ENSG00000270605	-	71.6722	1.54778	0.484943	3.19166	0.00141456	0.033218
chr1	71395943	72282539	NEGR1	-	9142.85	1.55315	0.29533	5.25904	1.44811e-07	1.90992e-05
chr1	44674692	44725591	ARMH1	+	116.566	1.55843	0.454562	3.42842	0.000607114	0.0184394
chr7	94656325	94669695	PEG10	+	9656.27	1.56433	0.234526	6.67015	2.5554e-11	6.93054e-09
chr3	157259742	157533619	VEPH1	-	283.511	1.5655	0.324073	4.83071	1.36049e-06	0.000133662
chr19	589881	617159	HCN2	+	580.273	1.56566	0.331445	4.72374	2.3155e-06	0.000208351
chr3	4493345	4847506	ITPR1	+	52279.8	1.56717	0.231327	6.77471	1.24657e-11	3.58267e-09
chr3	189631389	189897276	TP63	+	155.488	1.56796	0.400345	3.91652	8.98378e-05	0.0042714
chr3	155024124	155183704	MME	+	5323.46	1.57232	0.246835	6.3699	1.89147e-10	4.28495e-08
chr21	36445731	36532408	CLDN14-AS1	+	70.3256	1.5735	0.501172	3.13964	0.00169155	0.037828
chr9	98943179	99070792	COL15A1	+	2881.45	1.58069	0.260845	6.05987	1.36236e-09	2.62335e-07
chr5	6686325	6707711	LINC02102	-	132.143	1.58369	0.395789	4.00135	6.29814e-05	0.0031915
chr1	71794232	71837012	NEGR1-IT1	-	108.989	1.58825	0.466948	3.40135	0.000670539	0.019743
chr16	3065297	3082192	IL32	+	84.7734	1.58947	0.454392	3.49802	0.000468724	0.0150179
chr7	23235967	23275108	GPNMB	+	1586.19	1.59535	0.252246	6.3246	2.53897e-10	5.61958e-08
chr21	38812878	38956467	ENSG00000205622	-	238.153	1.60952	0.352165	4.57036	4.86876e-06	0.000388996
chr5	43376645	43412391	CCL28	-	286.731	1.61193	0.353661	4.55784	5.16828e-06	0.000404554
chr11	118226690	118252365	MPZL3	-	358.214	1.61617	0.325974	4.95797	7.12354e-07	7.5785e-05
chr9	34366666	34376898	MYORG	-	426.519	1.61728	0.329668	4.90577	9.30606e-07	9.53178e-05
chr2	156324437	156342348	NR4A2	-	1342.57	1.62467	0.24995	6.49999	8.03265e-11	2.03522e-08
chr17	79022814	79049788	C1QTNF1	+	127.867	1.62605	0.439428	3.70038	0.000215273	0.00832389
chrX	18989307	19122637	ADGRG2	-	2092.87	1.63357	0.243894	6.69786	2.11494e-11	5.81789e-09
chr10	88935074	88991339	ACTA2	-	349.538	1.64203	0.310419	5.28971	1.22508e-07	1.64966e-05
chr12	46537502	46652550	ENSG00000272369	+	739.583	1.64533	0.322913	5.09526	3.48257e-07	4.16524e-05
chr13	67121081	67156624	ENSG00000285588	+	158.493	1.65092	0.458488	3.6008	0.000317241	0.0111567
chrX	153687926	153696588	SLC6A8	+	82.3707	1.65104	0.507867	3.25094	0.00115026	0.0284606
chr4	171812254	173041559	GALNTL6	+	556.105	1.6516	0.284953	5.79602	6.79068e-09	1.17803e-06
chr4	188091272	188109603	TRIML2	-	815.997	1.65486	0.27894	5.93268	2.98023e-09	5.36329e-07
chr6	4304942	4583871	ENSG00000285424	-	73.0411	1.66325	0.531284	3.13063	0.00174434	0.038433
chr12	95657807	95791189	NTN4	-	1526.32	1.66788	0.257506	6.47705	9.35331e-11	2.30907e-08
chr1	77888513	77943895	NEXN	+	919.038	1.67059	0.289612	5.76836	8.00471e-09	1.36406e-06
chr6	6885713	6887257	ENSG00000288860	+	228.437	1.67887	0.401917	4.17715	2.95179e-05	0.00172241
chr1	225447233	225465400	LINC02765	-	1042.91	1.67996	0.364891	4.604	4.14453e-06	0.00034252
chr3	54122547	55074557	CACNA2D3	+	2523.44	1.68084	0.266588	6.30501	2.88175e-10	6.23494e-08
chr20	9067825	9504593	PLCB4	+	144.888	1.68246	0.421023	3.99612	6.43878e-05	0.00323588
chr16	66961245	66975149	CES3	+	2274.83	1.6837	0.250076	6.73274	1.66496e-11	4.71478e-09
chr12	114670255	114684175	TBX3	-	1834.65	1.68753	0.276502	6.10312	1.04017e-09	2.04383e-07
chr22	37180166	37199385	C1QTNF6	-	3784.07	1.6943	0.269864	6.27837	3.4215e-10	7.24004e-08
chr6	19323428	19839080	LNC-LBCS	-	665.855	1.69757	0.298027	5.69601	1.22641e-08	2.03584e-06
chr15	87325829	87703852	ENSG00000259560	-	270.073	1.70193	0.325457	5.22935	1.70104e-07	2.18368e-05
chr1	186296279	186314567	PRG4	+	304.819	1.70206	0.387774	4.38932	1.13706e-05	0.000784774
chr4	128292751	128519398	LINC02615	+	1983.21	1.70321	0.271165	6.28109	3.36204e-10	7.19327e-08
chr5	173911682	173912938	ENSG00000289085	+	150.903	1.70644	0.374113	4.5613	5.08384e-06	0.000399569
chr6	113969701	114471705	HDAC2-AS2	+	255.332	1.70831	0.338047	5.05347	4.3386e-07	5.09416e-05
chr11	57484534	57515780	SLC43A1	-	857.002	1.71127	0.290336	5.89411	3.76715e-09	6.71669e-07
chr12	14880864	14885857	MGP	-	370.765	1.71625	0.362882	4.7295	2.25079e-06	0.000204439
chr10	1957589	1960190	ENSG00000287653	+	177.382	1.71687	0.374056	4.58987	4.43528e-06	0.000361888
chr7	20330702	20415754	ITGB8	+	1741.6	1.71801	0.284076	6.04773	1.46899e-09	2.80067e-07
chr19	6677704	6730562	C3	-	1886.25	1.71859	0.303578	5.66113	1.50376e-08	2.43331e-06
chr1	70411218	70439851	CTH	+	5496.02	1.73351	0.243761	7.11152	1.14769e-12	4.09257e-10
chr19	43192702	43207299	PSG4	-	89.5897	1.73901	0.47199	3.68442	0.000229225	0.00872325
chr4	24321454	24323679	ENSG00000289902	+	63.3735	1.74127	0.509115	3.4202	0.000625762	0.0187982
chr11	78215293	78418348	GAB2	-	638.516	1.7422	0.292364	5.959	2.53793e-09	4.61042e-07
chr6	36676460	36687337	CDKN1A	+	1202.75	1.75522	0.265945	6.59992	4.11389e-11	1.08517e-08
chr3	10164919	10243745	IRAK2	+	245.954	1.7632	0.344904	5.11215	3.18512e-07	3.8574e-05
chr15	82659281	82710112	AP3B2	-	220.095	1.76482	0.360543	4.89489	9.83622e-07	9.91656e-05
chr19	55158939	55177540	DNAAF3-AS1	+	71.2353	1.76875	0.574919	3.07652	0.00209429	0.0436795
chrX	108155607	108439497	COL4A6	-	1641.85	1.77076	0.254427	6.95981	3.4074e-12	1.09355e-09
chr5	39331773	39424868	ENSG00000289699	-	6520.26	1.78026	0.260017	6.84671	7.55668e-12	2.27362e-09
chr5	39284140	39371324	C9	-	81.7671	1.78074	0.468061	3.80452	0.000142081	0.0060798
chr2	176989418	177164656	ENSG00000236501	-	60.686	1.78187	0.580811	3.0679	0.0021557	0.0444306
chr5	39371675	39462300	DAB2	-	6478.29	1.78375	0.259487	6.87415	6.23627e-12	1.90612e-09
chr6	137823673	137868233	WAKMAR2	-	115.792	1.78851	0.411799	4.34317	1.40441e-05	0.000925077
chrX	40262917	40299061	ENSG00000236393	+	58.483	1.78912	0.528891	3.38278	0.000717558	0.0203495
chr12	57010000	57028883	TAC3	-	200.321	1.79949	0.35387	5.08518	3.6727e-07	4.36553e-05
chr11	1571353	1599184	KRTAP5-AS1	+	515.211	1.8006	0.340232	5.29226	1.20812e-07	1.63828e-05
chr3	28349178	29767537	ENSG00000283563	+	628.005	1.81162	0.359485	5.0395	4.66757e-07	5.31827e-05
chr1	231626790	232041272	DISC1	+	74.6788	1.81173	0.505487	3.58413	0.000338202	0.011692
chr6	116494989	116545684	TRAPPC3L	-	158.186	1.81903	0.382078	4.76089	1.92737e-06	0.000182825
chr19	54497879	54510687	LAIR2	+	88.8034	1.82539	0.46249	3.94687	7.91804e-05	0.00388954
chr16	53035690	53052897	ENSG00000277639	-	170.166	1.85316	0.367508	5.04251	4.59476e-07	5.2941e-05
chrX	49187815	49200218	SYP	-	80.0419	1.86503	0.491053	3.79803	0.000145853	0.00617262
chr6	35220370	35224630	ENSG00000272374	-	105.677	1.87265	0.488626	3.83248	0.000126859	0.00552668
chr6	137867214	137883314	TNFAIP3	+	958.928	1.87315	0.282131	6.6393	3.15176e-11	8.42922e-09
chr18	3962353	4024150	DLGAP1-AS4	+	41.5592	1.87463	0.609817	3.07409	0.00211148	0.0437907
chr17	8063936	8072533	ALOXE3P1	+	81.2945	1.8819	0.485592	3.87547	0.000106417	0.00483295
chr10	60026298	60733490	ANK3	-	134.08	1.89619	0.399753	4.74339	2.10171e-06	0.000192717
chr16	81100875	81220370	PKD1L2	-	212.756	1.90869	0.422145	4.52139	6.14339e-06	0.000467577
chrX	23783173	23786210	SAT1	+	1630.34	1.90945	0.280689	6.80273	1.02655e-11	2.99502e-09
chr11	74235801	74311640	P4HA3	-	67.8593	1.91327	0.512684	3.73187	0.000190067	0.00756993
chr16	15434475	15625028	BMERB1	+	213.8	1.93099	0.368462	5.24068	1.59983e-07	2.09567e-05
chr2	206175316	206218047	CMKLR2	-	64.7164	1.93132	0.515434	3.74698	0.000178975	0.00727078
chr16	27313668	27364778	IL4R	+	130.143	1.93263	0.448596	4.30818	1.64601e-05	0.00105851
chr1	629640	630683	MTND2P28	+	213.565	1.93952	0.479855	4.0419	5.30196e-05	0.00278187
chr20	34704339	34713439	TP53INP2	+	155.196	1.95166	0.387596	5.0353	4.771e-07	5.38784e-05
chr18	23957754	23982556	LINC02958	-	913.753	1.96291	0.261273	7.51286	5.78509e-14	2.71702e-11
chr5	174336295	174532457	LINC01411	+	135.458	1.96804	0.390895	5.03471	4.78566e-07	5.38784e-05
chr2	165957188	166390771	SCN1A-AS1	+	72.3171	1.97217	0.488291	4.03891	5.36995e-05	0.00280227
chr8	40161458	40172612	ENSG00000254143	+	53.3385	1.98684	0.554045	3.58607	0.000335701	0.0116264
chr5	144856890	145228982	ENSG00000251031	-	180.925	1.99553	0.377378	5.28787	1.2375e-07	1.65481e-05
chr17	28364288	28368012	ENSG00000273171	-	1770.9	1.99631	0.297125	6.71875	1.83294e-11	5.11522e-09
chr20	6767686	6780246	BMP2	+	6704.54	2.00462	0.264456	7.58016	3.45131e-14	1.70406e-11
chr12	59523278	59524184	LINC02448	-	45.4634	2.00613	0.596761	3.36171	0.000774626	0.0212785
chr2	225668964	225670631	ENSG00000289265	+	37.1349	2.00678	0.64674	3.10291	0.00191626	0.0410451
chr4	57109762	57207459	IGFBP7-AS1	+	58.1674	2.00822	0.631854	3.1783	0.00148141	0.0343725
chr2	39786453	40255209	SLC8A1-AS1	+	72.0777	2.02878	0.53506	3.79169	0.000149628	0.00630646
chr2	40097270	40611053	SLC8A1	-	79.3078	2.03067	0.477635	4.25151	2.12335e-05	0.00131974
chr2	163743913	164352223	ENSG00000237844	-	55.6883	2.03259	0.562519	3.61337	0.000302238	0.0108378
chr2	20451042	20452947	ENSG00000228950	+	44.6453	2.04026	0.669085	3.04933	0.00229352	0.0464195
chr17	39210541	39225945	STAC2	-	61.8724	2.05041	0.521135	3.93451	8.33678e-05	0.00402857
chr11	118721104	118729412	ENSG00000287238	-	1824.23	2.05496	0.271354	7.57299	3.64738e-14	1.75585e-11
chr14	38738155	38948273	LINC00639	-	36.7846	2.0583	0.655742	3.13888	0.00169594	0.037828
chr19	47332175	47347329	C5AR2	+	2058.45	2.07955	0.254181	8.18139	2.80578e-16	2.00104e-13
chr11	102862736	102874982	MMP12	-	3250.29	2.08105	0.316054	6.5845	4.56427e-11	1.1877e-08
chr17	28367284	28373091	VTN	-	5622.18	2.09163	0.297389	7.0333	2.017e-12	6.81392e-10
chr19	13862063	13880757	NANOS3	+	55.0439	2.09556	0.639117	3.27884	0.00104235	0.0266907
chr8	94925972	94949378	TP53INP1	-	725.717	2.11538	0.29707	7.12081	1.07296e-12	3.89827e-10
chr17	80169992	80209331	CARD14	+	2381.82	2.11845	0.295919	7.15888	8.13373e-13	3.07104e-10
chr2	162170684	162245151	FAP	-	35.913	2.12231	0.680743	3.11763	0.00182309	0.0395331
chr21	43322417	43332039	LINC00322	-	562.747	2.13203	0.311534	6.84364	7.72042e-12	2.28715e-09
chr11	95150539	95234391	LNCRNA-IUR	+	264.537	2.13563	0.332019	6.43225	1.25731e-10	2.98898e-08
chr2	33436324	33564750	RASGRP3	+	136.205	2.13565	0.396021	5.39277	6.93779e-08	1.03996e-05
chr4	108808725	109302752	COL25A1	-	216.041	2.17017	0.395764	5.4835	4.16997e-08	6.42375e-06
chr12	51590266	51812864	SCN8A	+	425.631	2.18148	0.295549	7.3811	1.5699e-13	7.03024e-11
chr1	15490832	15526534	CASP9	-	1730.31	2.18207	0.263962	8.26663	1.37798e-16	1.02055e-13
chr21	26393635	26569252	CYYR1-AS1	+	244.208	2.18436	0.370803	5.89091	3.84084e-09	6.78525e-07
chr5	659862	693352	TPPP	-	336.412	2.1925	0.361551	6.06415	1.32655e-09	2.58021e-07
chrX	11117651	11665920	ARHGAP6	-	182.72	2.22965	0.393206	5.67045	1.42421e-08	2.34398e-06
chr1	200478020	200483604	ENSG00000282849	-	56.1835	2.23294	0.550796	4.05403	5.03436e-05	0.00267057
chr15	47812729	48050507	ENSG00000259754	+	925.107	2.23327	0.285889	7.81169	5.64246e-15	3.19562e-12
chr18	23598926	23662911	ANKRD29	-	364.745	2.2351	0.316004	7.07301	1.51607e-12	5.30789e-10
chr17	68267026	68291267	SLC16A6	-	1966.87	2.24341	0.266695	8.4119	4.03408e-17	3.23668e-14
chr4	89410960	89726752	ENSG00000251095	+	120.967	2.24592	0.512042	4.38621	1.15341e-05	0.000790393
chr2	144666312	145262988	TEX41	+	52.2467	2.25666	0.578313	3.90215	9.53438e-05	0.00444538
chr17	40850800	40863282	ENSG00000265359	+	185.488	2.26295	0.370032	6.11555	9.62231e-10	1.91018e-07
chr22	32801705	32863041	TIMP3	+	68.3229	2.28556	0.583974	3.91381	9.08512e-05	0.00429835
chr8	142670308	142682725	PSCA	+	108.985	2.29064	0.437513	5.2356	1.64454e-07	2.13968e-05
chr2	74518131	74526281	DQX1	-	89.7031	2.29546	0.458877	5.00234	5.66387e-07	6.2322e-05
chr12	57028517	57051198	MYO1A	-	810.04	2.30278	0.29818	7.72279	1.13807e-14	6.08742e-12
chr1	95510059	95782342	LINC02607	+	117.56	2.3061	0.464701	4.96255	6.95754e-07	7.44302e-05
chr7	38257879	38265678	TRGC1	-	1705.51	2.31616	0.299318	7.73813	1.00889e-14	5.55061e-12
chr1	53506237	53739164	GLIS1	-	1063.19	2.32054	0.290978	7.97496	1.52432e-15	9.17257e-13
chr17	40921430	40975926	ENSG00000234477	+	53.8693	2.32484	0.567427	4.09716	4.18249e-05	0.00230768
chr21	26378552	26471698	ENSG00000232692	+	219.269	2.33765	0.374007	6.25029	4.09679e-10	8.48256e-08
chr1	95743096	95759470	ENSG00000271252	+	59.3572	2.36132	0.627271	3.76443	0.000166929	0.00691267
chr7	38259643	38273636	TARP	-	2161.81	2.36478	0.284991	8.29775	1.06106e-16	8.17269e-14
chr12	9067664	9116229	A2M	-	195.903	2.36503	0.383392	6.1687	6.88527e-10	1.39561e-07
chr6	53930022	53997667	ENSG00000236740	+	35.1856	2.36924	0.675023	3.50987	0.000448329	0.0145337
chr6	150599883	150843665	PLEKHG1	+	632.066	2.37846	0.304471	7.8118	5.6377e-15	3.19562e-12
chr21	26917922	26967088	ADAMTS5	-	1093.76	2.38387	0.264944	8.99764	2.3062e-19	2.46712e-16
chr10	69220332	69267552	HKDC1	+	269.381	2.3896	0.342011	6.98691	2.81007e-12	9.32943e-10
chr6	31765590	31777328	VWA7	-	113.141	2.41898	0.501165	4.82672	1.38803e-06	0.000135675
chrX	70120353	70121474	MTCYBP31	-	59.4341	2.43715	0.6774	3.5978	0.000320925	0.0112155
chr7	110108031	110534757	ENSG00000226965	-	170.084	2.45363	0.388493	6.31576	2.6883e-10	5.88248e-08
chr14	52111122	52129625	LINC02319	-	59.1392	2.46322	0.557786	4.41607	1.0051e-05	0.000706359
chr11	18693122	18704785	TMEM86A	+	94.5306	2.47452	0.459398	5.38644	7.18653e-08	1.06449e-05
chr8	48818293	48824062	ENSG00000286878	+	35.3076	2.476	0.688297	3.59729	0.000321549	0.0112169
chr13	28820339	29505947	MTUS2	+	146.673	2.48231	0.47607	5.21417	1.84647e-07	2.33919e-05
chr5	139846779	140043299	NRG2	-	1652.03	2.49061	0.281234	8.85601	8.29284e-19	7.60414e-16
chr2	157257705	157318491	GALNT5	+	27.8086	2.5023	0.76847	3.25621	0.00112909	0.0282361
chr17	40475828	40501623	TNS4	-	256.066	2.50832	0.40127	6.25095	4.07976e-10	8.48256e-08
chr15	47956521	47988044	ENSG00000287439	-	27.6948	2.52541	0.758581	3.32912	0.000871212	0.0232355
chr1	43145153	43156396	FAM183A	+	29.2952	2.52686	0.771611	3.27478	0.00105743	0.0269694
chrX	23772992	23782956	ENSG00000233785	-	50.7765	2.52909	0.649523	3.89376	9.87011e-05	0.00456872
chr2	227871054	227924344	DAW1	+	79.526	2.55649	0.488546	5.23285	1.66917e-07	2.15715e-05
chr19	43460787	43465608	LYPD3	-	1078.84	2.5615	0.314997	8.13182	4.22906e-16	2.90839e-13
chr18	54901509	54959461	CCDC68	-	243.178	2.59828	0.35255	7.36995	1.70692e-13	7.30408e-11
chr19	38867830	38878275	RINL	-	35.7586	2.60251	0.684552	3.80177	0.000143667	0.00612046
chr7	31751179	32428131	PDE1C	-	60.393	2.60521	0.556429	4.68202	2.84068e-06	0.000249773
chr12	80402178	80680273	PTPRQ	+	219.722	2.6232	0.361518	7.25608	3.9848e-13	1.59857e-10
chr8	101686542	102124907	NCALD	-	79.3525	2.63853	0.491928	5.36365	8.1555e-08	1.18271e-05
chr1	205913048	205943460	SLC26A9	-	37.0903	2.6664	0.683016	3.90386	9.46721e-05	0.00443554
chr1	77881348	77889539	NEXN-AS1	-	67.9121	2.71381	0.534039	5.08166	3.74143e-07	4.41993e-05
chr5	1008802	1038943	NKD2	+	401.557	2.72233	0.842951	3.22953	0.00123994	0.0300475
chr7	18086949	19002416	HDAC9	+	285.999	2.72697	0.337445	8.08125	6.41079e-16	4.25677e-13
chr7	81489204	81691406	ENSG00000233491	-	57.9771	2.73823	0.598401	4.57592	4.74142e-06	0.000383617
chr5	15112120	15266541	LINC02149	-	35.0408	2.757	0.706126	3.9044	9.44589e-05	0.00443554
chr1	89006679	89022894	GBP3	-	59.3859	2.77538	0.584159	4.75107	2.02347e-06	0.000188232
chr12	25409307	25648579	LMNTD1	-	22.4069	2.7998	0.885156	3.16306	0.00156122	0.035789
chr1	11066618	11099869	EXOSC10	-	15822.5	2.85054	0.237202	12.0174	2.88041e-33	6.93315e-30
chr6	21664184	22654455	CASC15	+	180.741	2.85433	0.387131	7.37303	1.66792e-13	7.29941e-11
chr15	59995648	60004054	ENSG00000289162	-	184.09	2.87233	0.378794	7.58282	3.38125e-14	1.70406e-11
chr1	108712908	108742749	FNDC7	+	56.3622	2.90343	0.575906	5.0415	4.61886e-07	5.2941e-05
chr17	80824170	80826900	ENSG00000287403	-	64.8884	2.92724	0.545618	5.365	8.09502e-08	1.18271e-05
chr8	143419182	143430732	MAFA	-	51.9857	2.92878	0.65499	4.47149	7.7677e-06	0.000573084
chr1	218912757	218918714	LINC01710	-	40.8853	2.93739	0.662034	4.43691	9.12588e-06	0.000660632
chr3	49554477	49671549	BSN	+	75.1764	2.9589	0.530462	5.57797	2.43339e-08	3.90477e-06
chr10	52314281	52318042	DKK1	+	492.767	2.97475	0.329697	9.02269	1.83534e-19	2.07891e-16
chr19	18374731	18389176	GDF15	+	464.67	2.97604	0.369542	8.05333	8.05732e-16	5.17172e-13
chr10	69215333	69232490	ENSG00000229261	-	34.5625	3.03304	0.729248	4.15913	3.19464e-05	0.0018254
chr8	31639222	32855666	NRG1	+	38.0708	3.05484	0.687844	4.44118	8.94681e-06	0.000650112
chr5	39520398	39524726	LINC02104	+	27.2345	3.05881	0.820615	3.72747	0.000193414	0.00766335
chr4	22989147	23193740	ENSG00000248837	+	27.7673	3.06166	0.793793	3.857	0.000114788	0.00509491
chr3	178419123	178843300	ENSG00000275163	+	24.645	3.08692	0.855233	3.60945	0.000306843	0.0109014
chr21	38121451	38156511	DSCR8	+	23.0842	3.0922	0.871922	3.54641	0.000390511	0.013055
chr3	178272932	178844429	KCNMB2	+	25.2251	3.12289	0.849691	3.67532	0.00023755	0.0089516
chr17	41619442	41624842	KRT17	-	1155.42	3.14802	0.295274	10.6613	1.54352e-26	2.47683e-23
chr13	112894378	113099742	MCF2L	+	67.9156	3.14869	0.647107	4.8658	1.13993e-06	0.000113734
chrX	136146702	136211359	FHL1	+	26.7171	3.16681	0.911956	3.47255	0.000515544	0.0162211
chr8	123614219	123667248	ENSG00000253286	+	19.5103	3.16752	1.02497	3.09036	0.00199916	0.0425527
chr8	119416446	119424434	CCN3	+	127.3	3.18216	0.457938	6.9489	3.68151e-12	1.1434e-09
chr5	161847063	161899981	GABRA1	+	382.84	3.21278	0.339958	9.45051	3.37181e-21	4.05797e-18
chr5	128257909	128659185	FBN2	-	25.068	3.22586	0.847418	3.80669	0.000140841	0.00605364
chr15	98880659	98893535	ENSG00000259621	-	446.105	3.27866	0.314513	10.4246	1.91544e-25	2.83721e-22
chr14	62699464	63102037	KCNH5	-	384.701	3.30345	0.367786	8.982	2.65881e-19	2.69463e-16
chr2	67086446	67311439	LINC01828	+	29.6234	3.33755	0.795712	4.19442	2.7357e-05	0.00164108
chr17	41500981	41505705	KRT13	-	35.6877	3.36674	0.743152	4.53035	5.88847e-06	0.000455375
chr22	50089879	50161690	MOV10L1	+	54.6897	3.38478	0.616271	5.49235	3.96618e-08	6.15909e-06
chr14	95620914	95643285	ENSG00000258927	+	68.4134	3.38593	0.633242	5.34697	8.94392e-08	1.27573e-05
chr20	35558737	35607562	FER1L4	-	34.7302	3.41424	0.744984	4.58297	4.58421e-06	0.000372462
chr6	116529013	116561127	CALHM4	+	52.3827	3.42397	0.6384	5.36336	8.16889e-08	1.18271e-05
chr1	186671791	186680922	PTGS2	-	122.343	3.50291	0.495805	7.0651	1.60499e-12	5.51889e-10
chr8	22114419	22133384	HR	-	117.141	3.52325	0.482423	7.30323	2.8093e-13	1.15098e-10
chr1	23191895	23217502	HTR1D	-	18.6943	3.52719	1.05367	3.34753	0.000815347	0.0221131
chr16	4882507	4960741	PPL	-	2164.95	3.52931	0.289469	12.1924	3.41398e-34	9.39137e-31
chr4	109731008	109802150	CFI	-	104.16	3.52978	0.505909	6.9771	3.01329e-12	9.83455e-10
chr9	84275457	84340758	SLC28A3	-	23.798	3.55562	0.902631	3.93918	8.17619e-05	0.00396576
chr12	85874295	85882992	NTS	+	19.1026	3.55611	1.06683	3.33334	0.000858103	0.0229177
chr14	69569799	69574871	CCDC177	-	17.3051	3.61437	1.06163	3.40455	0.000662729	0.0196029
chr11	57597387	57619171	SERPING1	+	26.5962	3.63481	0.928444	3.91495	9.04247e-05	0.00428872
chr2	223596940	223602361	SCG2	-	66.5289	3.66796	0.609645	6.01655	1.7817e-09	3.33243e-07
chr21	41175231	41186788	PLAC4	-	2456.44	3.75446	0.305026	12.3087	8.13703e-35	2.61145e-31
chr8	29288506	29320284	ENSG00000288735	-	20.613	3.81673	0.997461	3.82645	0.000130004	0.00565091
chr1	11068471	11073097	ENSG00000226849	+	117.037	3.81841	0.47499	8.03893	9.06262e-16	5.62935e-13
chr3	28574791	30010391	RBMS3	+	400.845	3.86368	0.389185	9.92762	3.15701e-23	4.34224e-20
chr3	178419201	178457309	LINC01014	+	17.6137	4.03388	1.13765	3.54581	0.000391403	0.0130621
chr15	80404350	80597933	ARNT2	+	65.0793	4.05159	0.632525	6.40543	1.49949e-10	3.47883e-08
chr14	38034287	38194281	ENSG00000259048	-	13.3506	4.05268	1.29716	3.12426	0.00178251	0.0389825
chr8	96645242	97149654	CPQ	+	13.4713	4.06443	1.2919	3.14609	0.00165468	0.0373261
chr22	32583300	32584204	SYN3-AS1	+	119.911	4.08323	0.551708	7.40107	1.35087e-13	6.1934e-11
chr12	70515870	70637440	PTPRB	-	46.8369	4.2239	0.732779	5.76421	8.2041e-09	1.38577e-06
chr5	9035033	9546075	SEMA5A	-	61.1626	4.24234	0.667347	6.35702	2.05699e-10	4.60575e-08
chr20	2816302	2820284	TMEM239	+	12.4959	4.54402	1.43976	3.15609	0.00159898	0.0363518
chr7	130730697	130734207	KLF14	-	13.3173	4.63168	1.41468	3.27401	0.00106031	0.0270072
chr8	144409742	144416844	SLC39A4	-	21.7892	4.75899	1.14915	4.14131	3.45324e-05	0.00195002
chr20	2814968	2818066	ENSG00000241690	+	14.7465	4.79057	1.40557	3.40829	0.000653724	0.0194261
chr6	13924446	13980310	RNF182	+	15.5424	4.85579	1.37034	3.54349	0.000394876	0.0131325
chr8	119165034	119245673	MAL2	+	592.796	4.9327	0.363294	13.5777	5.43014e-42	2.09125e-38
chr4	74445136	74455005	AREG	+	49.3511	4.94637	0.842631	5.87015	4.35405e-09	7.62197e-07
chr4	176213673	176277571	ASB5	-	28.6283	5.09627	1.0687	4.76865	1.85466e-06	0.000176799
chr8	105546089	106060524	ZFPM2-AS1	-	161.331	5.14698	0.527403	9.75911	1.68622e-22	2.16466e-19
chr16	66366622	66404784	CDH5	+	110.282	5.15264	0.595335	8.65503	4.92799e-18	4.31333e-15
chr21	34668994	34718227	CLIC6	+	11.1796	5.32748	1.71647	3.10374	0.00191092	0.0410219
chr5	1201595	1225111	SLC6A19	+	23.0366	5.41702	1.27935	4.23421	2.2936e-05	0.00140914
chr1	184387029	184629019	C1orf21	+	794.37	5.45505	0.373922	14.5887	3.31218e-48	1.59448e-44
chr13	52488993	52587095	TPTE2P3	+	12.6297	5.50283	1.68914	3.25777	0.0011229	0.0281178
chr5	74627406	74641424	ENC1	-	27.5842	5.67841	1.24265	4.56959	4.88687e-06	0.000388996
chr3	12287368	12434356	PPARG	+	238.657	5.78716	0.49672	11.6507	2.27486e-31	4.38048e-28
chr7	45080437	45088969	NACAD	-	16.0891	5.86039	1.62354	3.60964	0.000306626	0.0109014
chr12	78863993	79452008	SYT1	+	113.135	6.05782	0.710068	8.53133	1.44676e-17	1.21126e-14
chr2	21221169	21970959	ENSG00000233005	+	207.567	6.25935	0.573828	10.9081	1.05489e-27	1.84663e-24
chr14	36070427	36165288	LINC00609	+	21.4348	6.28028	1.56993	4.00037	6.32446e-05	0.00319642
chr2	21317660	21561313	ENSG00000231204	+	45.4102	6.39893	1.17518	5.44508	5.17826e-08	7.91369e-06
chr17	64099	76866	LINC02887	-	24.4881	6.48518	1.58954	4.07992	4.50508e-05	0.0024575
chr8	122781655	122974510	ZHX2	+	691.778	6.72594	0.427917	15.7179	1.14063e-55	7.32133e-52
chr8	87540835	87755718	ENSG00000253500	-	3060.51	6.7689	0.324354	20.8689	1.0273e-96	1.97817e-92
chr8	87575598	87576508	VTA1P2	-	11.6822	6.84123	1.78111	3.84098	0.000122544	0.00536296
chr19	20776304	20809995	ZNF66	+	11.8515	6.86223	1.77793	3.85967	0.000113542	0.00508638
chr8	142212080	142403182	TSNARE1	-	94.5203	6.87814	0.96204	7.14954	8.70666e-13	3.22414e-10
chr8	120535745	120813273	SNTB1	-	914.07	6.9649	0.388667	17.92	8.23948e-72	7.93297e-68
chr3	151294086	151316820	GPR87	-	12.84	6.96562	1.74472	3.9924	6.54068e-05	0.00326288
chr8	122807746	122816517	ENSG00000253372	+	34.8339	6.98493	1.50704	4.63486	3.57176e-06	0.000300537
chr1	86424171	86456553	CLCA2	+	13.0581	6.9917	1.73875	4.0211	5.79263e-05	0.00297448
chr8	80967810	81112068	PAG1	-	291.476	7.04178	0.597411	11.7872	4.54614e-32	9.72671e-29
chr1	184408337	184412360	ENSG00000230470	+	14.0998	7.10922	1.72359	4.12465	3.71291e-05	0.00207837
chr8	87598462	87601634	IARS2P1	-	60.7738	7.78188	1.46063	5.32777	9.94245e-08	1.36751e-05
chr8	104489231	104589258	LRP12	-	212.967	8.0371	0.905917	8.87179	7.1979e-19	6.93014e-16
chr4	100421655	100474461	ENSG00000286150	+	34.2902	8.3856	1.57256	5.33247	9.68867e-08	1.35192e-05
